# Supplementary material for: Identification of Faba bean genetic loci associated with quantitative resistance to the fungus Botrytis fabae, causal agent of chocolate spot
Source: Front Plant Sci. 2024 Apr 19;15:1383396. doi: 10.3389/fpls.2024.1383396 (PMC11067873; doi:10.3389/fpls.2024.1383396)
Supplement: Supplementary file 1 [file Table_1.xlsx]

## Sheet: Table_S1
Table S1: Linkage map of NV640 x NV293 with markers anchored to genes of reference genome GCA_948472305.1 for Vicia faba "Hedin 2" (Jayakodi et al., 2023).						Table S1b: Linkage map of NV640 x NV293, summary.
DArT-marker	Linkage group	pos. (cM)	Vfaba Hedin gene			Linkage group	markers	LG-length (cM)	ave.spacing (cM)	max.spacing (cM)
32611019|F|0-39:C>T-39:C>T	LG1	0				LG1	1105	540.9	0.5	6.6
13911615|F|0-21:T>C-21:T>C	LG1	0				LG2	643	281	0.4	4.1
3519463|F|0-58:A>T-58:A>T	LG1	0				LG3	632	254.6	0.4	4.4
3522215|F|0-63:A>T-63:A>T	LG1	0	Vfaba.Hedin2.R1g001840			LG4	566	226.9	0.4	5.1
3520969|F|0-61:C>T-61:C>T	LG1	0.331829				LG5	460	204.3	0.4	5.1
32608481|F|0-67:G>T-67:G>T	LG1	0.331829	Vfaba.Hedin2.R1g001840			LG6	491	206	0.4	4.4
3518988|F|0-24:G>A-24:G>A	LG1	0.996873				overall	3897	1713.7	0.4	6.6
3515824|F|0-27:T>A-27:T>A	LG1	2.66999	Vfaba.Hedin2.R1g005880
3521405|F|0-37:G>A-37:G>A	LG1	3.00177
3516686|F|0-56:C>T-56:C>T	LG1	3.00177
3524058|F|0-42:A>T-42:A>T	LG1	3.00177	Vfaba.Hedin2.R1g007120
3521819|F|0-61:C>T-61:C>T	LG1	5.35358	Vfaba.Hedin2.R1g010400
13864643|F|0-48:G>A-48:G>A	LG1	6.0184	Vfaba.Hedin2.R1g010960
3520927|F|0-52:A>C-52:A>C	LG1	6.0184	Vfaba.Hedin2.R1g011880
3528323|F|0-21:T>C-21:T>C	LG1	6.0184	Vfaba.Hedin2.R1g010680
3507818|F|0-12:G>A-12:G>A	LG1	12.5888	Vfaba.Hedin2.R1g014720
13910283|F|0-12:C>G-12:C>G	LG1	12.5888
13904754|F|0-43:C>T-43:C>T	LG1	14.5989	Vfaba.Hedin2.R1g015840
32612545|F|0-21:G>T-21:G>T	LG1	17.291
3511226|F|0-9:C>T-9:C>T	LG1	17.291	Vfaba.Hedin2.R1g018880
3524149|F|0-5:G>A-5:G>A	LG1	17.291
3511347|F|0-61:C>A-61:C>A	LG1	17.6227	Vfaba.Hedin2.R1.4g070720
3519410|F|0-50:C>T-50:C>T	LG1	17.6227	Vfaba.Hedin2.R1g019720
3520291|F|0-18:T>G-18:T>G	LG1	18.9575	Vfaba.Hedin2.R1g020360
3519798|F|0-24:C>T-24:C>T	LG1	18.9575
3521266|F|0-33:C>A-33:C>A	LG1	19.6222	Vfaba.Hedin2.R1g022120
3508194|F|0-30:T>C-30:T>C	LG1	19.9539
18318820|F|0-12:A>G-12:A>G	LG1	19.9539	Vfaba.Hedin2.R1g022080
3518915|F|0-29:T>A-29:T>A	LG1	21.6254
3519401|F|0-45:C>T-45:C>T	LG1	22.9597	Vfaba.Hedin2.R1g023720
39979320|F|0-28:T>C-28:T>C	LG1	22.9597	Vfaba.Hedin2.R1g023720
13905771|F|0-22:G>A-22:G>A	LG1	22.9597
32613019|F|0-30:G>A-30:G>A	LG1	23.6243
3530064|F|0-45:G>C-45:G>C	LG1	23.956	Vfaba.Hedin2.R1g024640
13911051|F|0-25:A>C-25:A>C	LG1	23.956
3519901|F|0-37:G>C-37:G>C	LG1	24.2877
3507627|F|0-15:G>A-15:G>A	LG1	26.636	Vfaba.Hedin2.R1g027560
3521618|F|0-63:T>G-63:T>G	LG1	26.636
3531163|F|0-14:C>G-14:C>G	LG1	26.636
32608563|F|0-46:A>T-46:A>T	LG1	26.636	Vfaba.Hedin2.R1g025600
13911149|F|0-24:G>A-24:G>A	LG1	26.636
3522927|F|0-27:G>A-27:G>A	LG1	27.6348	Vfaba.Hedin2.R1g027920
3530300|F|0-13:G>C-13:G>C	LG1	27.6348
3519763|F|0-34:G>T-34:G>T	LG1	27.6348	Vfaba.Hedin2.R1g026600
3531997|F|0-19:A>T-19:A>T	LG1	27.6348
3512314|F|0-55:G>A-55:G>A	LG1	27.6348
3513889|F|0-63:A>T-63:A>T	LG1	29.3065	Vfaba.Hedin2.R1g029560
39974262|F|0-26:G>A-26:G>A	LG1	29.3065
13908660|F|0-23:A>G-23:A>G	LG1	29.9713
3526817|F|0-38:G>A-38:G>A	LG1	31.3059
39975943|F|0-15:A>G-15:A>G	LG1	31.6377
3523348|F|0-49:T>C-49:T>C	LG1	31.9694
39972535|F|0-63:C>T-63:C>T	LG1	33.9783
3526593|F|0-22:A>C-22:A>C	LG1	33.9783
3526707|F|0-34:G>A-34:G>A	LG1	33.9783
3520044|F|0-24:C>T-24:C>T	LG1	34.6429
13913229|F|0-9:C>T-9:C>T	LG1	34.9746
13908277|F|0-7:G>A-7:G>A	LG1	35.3064
3512561|F|0-58:C>G-58:C>G	LG1	35.6381
13868679|F|0-20:T>C-20:T>C	LG1	35.6381
13911626|F|0-42:T>C-42:T>C	LG1	35.9698
13865523|F|0-54:T>A-54:T>A	LG1	35.9698
3508036|F|0-39:C>T-39:C>T	LG1	35.9698
3529687|F|0-48:T>C-48:T>C	LG1	36.3015
3531629|F|0-8:A>G-8:A>G	LG1	36.6333
13909338|F|0-13:A>G-13:A>G	LG1	36.6333
22856352|F|0-45:G>C-45:G>C	LG1	37.6324
39983066|F|0-37:T>G-37:T>G	LG1	37.9642
22856393|F|0-32:C>T-32:C>T	LG1	38.6289
3520369|F|0-9:T>G-9:T>G	LG1	38.6289
22856751|F|0-37:A>G-37:A>G	LG1	38.6289	Vfaba.Hedin2.R1g039440
3511820|F|0-19:A>G-19:A>G	LG1	40.6396
13866823|F|0-30:T>A-30:T>A	LG1	40.6396
3528875|F|0-52:G>C-52:G>C	LG1	41.9745
3518698|F|0-61:C>T-61:C>T	LG1	42.3062	Vfaba.Hedin2.R1g043320
3521040|F|0-50:C>T-50:C>T	LG1	43.6411	Vfaba.Hedin2.R1g044680
13865565|F|0-6:A>G-6:A>G	LG1	43.6411
3508377|F|0-27:A>T-27:A>T	LG1	43.6411
39983226|F|0-65:A>C-65:A>C	LG1	44.6403
13867931|F|0-17:C>G-17:C>G	LG1	44.6403
13865537|F|0-8:G>C-8:G>C	LG1	44.6403
3521144|F|0-35:C>G-35:C>G	LG1	45.6396
22857479|F|0-23:C>T-23:C>T	LG1	46.6389
3527652|F|0-58:T>C-58:T>C	LG1	46.6389
32610098|F|0-15:C>T-15:C>T	LG1	46.6389
3525093|F|0-50:G>A-50:G>A	LG1	46.6389	Vfaba.Hedin2.R1.6g007320
13911995|F|0-31:G>A-31:G>A	LG1	47.3037	Vfaba.Hedin2.R1g050400
3509331|F|0-40:C>T-40:C>T	LG1	47.3037
13912421|F|0-23:C>T-23:C>T	LG1	47.3037	Vfaba.Hedin2.R1g051600
13867663|F|0-47:C>T-47:C>T	LG1	47.9685
13910695|F|0-68:A>G-68:A>G	LG1	47.9685
3525670|F|0-9:T>G-9:T>G	LG1	47.9685
3521794|F|0-50:G>A-50:G>A	LG1	48.3002
3509923|F|0-36:A>C-36:A>C	LG1	49.9715
39981679|F|0-67:A>G-67:A>G	LG1	51.9808
32612126|F|0-38:T>C-38:T>C	LG1	52.3125	Vfaba.Hedin2.R1g055800
13869033|F|0-7:T>C-7:T>C	LG1	52.3125	Vfaba.Hedin2.R1g055360
13912387|F|0-6:T>A-6:T>A	LG1	52.3125
3508376|F|0-7:T>C-7:T>C	LG1	52.3125
18317276|F|0-11:G>T-11:G>T	LG1	52.9772
18321046|F|0-42:T>C-42:T>C	LG1	52.9772	Vfaba.Hedin2.R1g056440
18320958|F|0-24:C>T-24:C>T	LG1	52.9772	Vfaba.Hedin2.R1g057000
3521553|F|0-30:G>A-30:G>A	LG1	54.3116
32611385|F|0-37:T>G-37:T>G	LG1	54.3116	Vfaba.Hedin2.R1.Ung008840
3529864|F|0-19:T>C-19:T>C	LG1	59.0891
3526603|F|0-23:A>G-23:A>G	LG1	60.4238
3522530|F|0-32:G>C-32:G>C	LG1	60.4238
3519988|F|0-50:G>T-50:G>T	LG1	60.4238	Vfaba.Hedin2.R1g059120
39972652|F|0-27:T>C-27:T>C	LG1	60.4238
3514808|F|0-29:T>A-29:T>A	LG1	60.4238
39977855|F|0-38:G>A-38:G>A	LG1	60.4238	Vfaba.Hedin2.R1g060160
3513337|F|0-29:C>A-29:C>A	LG1	61.7581
3512114|F|0-12:C>G-12:C>G	LG1	62.4226
13904483|F|0-50:G>A-50:G>A	LG1	63.0872
3526846|F|0-47:T>C-47:T>C	LG1	64.0858	Vfaba.Hedin2.R1g063000
39983126|F|0-5:C>T-5:C>T	LG1	64.7502
3522383|F|0-63:T>C-63:T>C	LG1	66.7575	Vfaba.Hedin2.R1g064000
3526656|F|0-22:T>C-22:T>C	LG1	70.1293	Vfaba.Hedin2.R1g066760
13904812|F|0-34:A>G-34:A>G	LG1	70.461
3522073|F|0-11:G>T-11:G>T	LG1	70.7926	Vfaba.Hedin2.R1g065200
3523340|F|0-38:C>T-38:C>T	LG1	70.7926	Vfaba.Hedin2.R1g065280
3531678|F|0-12:C>T-12:C>T	LG1	71.1243	Vfaba.Hedin2.R1g065320
3512200|F|0-12:T>C-12:T>C	LG1	71.7888	Vfaba.Hedin2.R1.3g089080
3530939|F|0-24:C>G-24:C>G	LG1	73.7964
3511429|F|0-57:T>C-57:T>C	LG1	74.4608
3526530|F|0-5:A>G-5:A>G	LG1	75.4592
3523637|F|0-49:T>A-49:T>A	LG1	75.7909	Vfaba.Hedin2.R1g068640
3527456|F|0-67:A>T-67:A>T	LG1	76.4553	Vfaba.Hedin2.R1g069520
32612358|F|0-41:T>G-41:T>G	LG1	77.1197
3522777|F|0-7:C>A-7:C>A	LG1	77.1197	Vfaba.Hedin2.R1g069760
3522835|F|0-12:C>G-12:C>G	LG1	81.1836	Vfaba.Hedin2.R1.Ung085120
3523578|F|0-18:G>A-18:G>A	LG1	81.1836
39974523|F|0-5:C>T-5:C>T	LG1	81.1836
13906134|F|0-8:C>G-8:C>G	LG1	82.8542
3521300|F|0-35:A>T-35:A>T	LG1	84.1879
3528227|F|0-13:G>A-13:G>A	LG1	84.8523
3527310|F|0-11:C>T-11:C>T	LG1	85.184
3514664|F|0-10:A>G-10:A>G	LG1	85.184
3530976|F|0-22:G>A-22:G>A	LG1	86.5175
3513645|F|0-30:T>C-30:T>C	LG1	86.8492	Vfaba.Hedin2.R1g076120
18320432|F|0-63:T>A-63:T>A	LG1	89.8787
3514116|F|0-66:T>A-66:T>A	LG1	89.8787
3526594|F|0-7:A>G-7:A>G	LG1	89.8787
32610944|F|0-15:A>C-15:A>C	LG1	89.8787
13868239|F|0-12:G>A-12:G>A	LG1	90.5432	Vfaba.Hedin2.R1g080240
13911618|F|0-53:T>C-53:T>C	LG1	90.5432	Vfaba.Hedin2.R1g080200
3529337|F|0-67:C>T-67:C>T	LG1	91.2077
22857894|F|0-23:A>T-23:A>T	LG1	91.2077
3531265|F|0-24:G>A-24:G>A	LG1	91.5394	Vfaba.Hedin2.R1.2g102960
13863742|F|0-61:C>A-61:C>A	LG1	91.5394
13909494|F|0-25:C>T-25:C>T	LG1	91.8711
39977579|F|0-48:G>A-48:G>A	LG1	92.5355	Vfaba.Hedin2.R1g086400
3526919|F|0-8:G>A-8:G>A	LG1	92.5355
3526919|F|0-11:C>T-11:C>T	LG1	92.5355
13867891|F|0-10:T>C-10:T>C	LG1	93.5339
32611537|F|0-54:G>A-54:G>A	LG1	93.5339
13909227|F|0-27:A>G-27:A>G	LG1	93.5339	Vfaba.Hedin2.R1g082280
3524204|F|0-55:C>A-55:C>A	LG1	93.5339
3513602|F|0-12:T>A-12:T>A	LG1	93.5339
13913247|F|0-19:G>C-19:G>C	LG1	93.8656
3512595|F|0-23:G>A-23:G>A	LG1	94.1973
3514003|F|0-15:T>A-15:T>A	LG1	94.1973	Vfaba.Hedin2.R1g087840
32611923|F|0-40:A>C-40:A>C	LG1	94.1973	Vfaba.Hedin2.R1g086880
13911531|F|0-67:T>C-67:T>C	LG1	94.1973
3511513|F|0-57:T>C-57:T>C	LG1	94.529	Vfaba.Hedin2.R1g086840
39981067|F|0-57:T>C-57:T>C	LG1	94.529
3510005|F|0-33:G>C-33:G>C	LG1	94.8607
39979259|F|0-35:A>T-35:A>T	LG1	95.8591	Vfaba.Hedin2.R1g084880
22857886|F|0-14:G>A-14:G>A	LG1	95.8591
3513115|F|0-58:A>G-58:A>G	LG1	95.8591
3512942|F|0-36:T>C-36:T>C	LG1	97.8664	Vfaba.Hedin2.R1g090360
13905243|F|0-25:A>T-25:A>T	LG1	99.1998
13908975|F|0-16:C>T-16:C>T	LG1	99.1998
32613201|F|0-61:G>A-61:G>A	LG1	100.198	Vfaba.Hedin2.R1g093720
3514275|F|0-5:C>T-5:C>T	LG1	100.53
22856928|F|0-67:G>T-67:G>T	LG1	100.53	Vfaba.Hedin2.R1g096360
3514737|F|0-66:G>C-66:G>C	LG1	100.862	Vfaba.Hedin2.R1g093800
39979726|F|0-67:G>A-67:G>A	LG1	100.862	Vfaba.Hedin2.R1g093480
22856757|F|0-43:C>T-43:C>T	LG1	100.862	Vfaba.Hedin2.R1g094520
32610148|F|0-30:A>C-30:A>C	LG1	100.862
39977925|F|0-51:A>G-51:A>G	LG1	102.869	Vfaba.Hedin2.R1g097200
3525824|F|0-51:G>A-51:G>A	LG1	102.869	Vfaba.Hedin2.R1g097240
13909213|F|0-15:C>T-15:C>T	LG1	103.867	Vfaba.Hedin2.R1g097840
13908714|F|0-30:C>T-30:C>T	LG1	105.536	Vfaba.Hedin2.R1g098920
3507811|F|0-41:A>T-41:A>T	LG1	105.536
3507811|F|0-5:T>C-5:T>C	LG1	105.536
3514286|F|0-15:A>G-15:A>G	LG1	106.201
3520983|F|0-50:G>A-50:G>A	LG1	106.201
13868999|F|0-16:T>C-16:T>C	LG1	106.865
3519634|F|0-32:T>C-32:T>C	LG1	106.865
3530146|F|0-22:C>T-22:C>T	LG1	106.865
39974223|F|0-18:A>G-18:A>G	LG1	106.865
39979196|F|0-43:T>C-43:T>C	LG1	106.865	Vfaba.Hedin2.R1g099880
32611139|F|0-12:C>T-12:C>T	LG1	107.53	Vfaba.Hedin2.R1g100440
13913286|F|0-19:G>C-19:G>C	LG1	108.194	Vfaba.Hedin2.R1g101800
3527255|F|0-29:A>G-29:A>G	LG1	108.194
22855834|F|0-13:C>G-13:C>G	LG1	108.858
13911070|F|0-8:C>A-8:C>A	LG1	110.191	Vfaba.Hedin2.R1g103480
3518860|F|0-16:C>T-16:C>T	LG1	110.191	Vfaba.Hedin2.R1g103360
13905267|F|0-33:T>C-33:T>C	LG1	110.191
3514384|F|0-43:T>G-43:T>G	LG1	110.191
13866427|F|0-60:A>T-60:A>T	LG1	110.191	Vfaba.Hedin2.R1g103440
32612048|F|0-59:C>T-59:C>T	LG1	110.191
3526645|F|0-9:C>T-9:C>T	LG1	112.197
3528154|F|0-64:T>C-64:T>C	LG1	112.197	Vfaba.Hedin2.R1g104080
32610338|F|0-39:A>G-39:A>G	LG1	113.53
13909201|F|0-52:A>G-52:A>G	LG1	113.861	Vfaba.Hedin2.R1g105360
13910700|F|0-53:T>A-53:T>A	LG1	114.526
3531256|F|0-24:T>A-24:T>A	LG1	115.19
3508889|F|0-36:T>G-36:T>G	LG1	115.19	Vfaba.Hedin2.R1g107560
39980707|F|0-14:A>G-14:A>G	LG1	115.19
3521332|F|0-16:T>C-16:T>C	LG1	115.854
13868094|F|0-51:C>A-51:C>A	LG1	115.854
3527579|F|0-65:T>C-65:T>C	LG1	115.854	Vfaba.Hedin2.R1g107560
32612697|F|0-5:T>G-5:T>G	LG1	116.518	Vfaba.Hedin2.R1g108360
13865046|F|0-63:T>C-63:T>C	LG1	116.85	Vfaba.Hedin2.R1g108240
13868925|F|0-46:T>C-46:T>C	LG1	117.848
3529366|F|0-63:G>T-63:G>T	LG1	118.179
32612540|F|0-34:G>T-34:G>T	LG1	119.849
3512544|F|0-54:T>C-54:T>C	LG1	120.18
13910875|F|0-57:T>A-57:T>A	LG1	120.18
13911725|F|0-17:A>G-17:A>G	LG1	120.18
3512340|F|0-19:C>T-19:C>T	LG1	120.18	Vfaba.Hedin2.R1g110840
13912342|F|0-28:G>A-28:G>A	LG1	120.18
39981779|F|0-27:G>A-27:G>A	LG1	120.18
39977578|F|0-36:T>A-36:T>A	LG1	120.18	Vfaba.Hedin2.R1g111360
3516798|F|0-5:T>C-5:T>C	LG1	120.512
13906258|F|0-39:A>T-39:A>T	LG1	121.51
18318748|F|0-10:G>A-10:G>A	LG1	124.882
13869255|F|0-6:A>G-6:A>G	LG1	124.882
3523017|F|0-17:G>A-17:G>A	LG1	124.882
39972627|F|0-24:T>C-24:T>C	LG1	125.88	Vfaba.Hedin2.R1g115680
13912346|F|0-9:G>A-9:G>A	LG1	125.88	Vfaba.Hedin2.R1g115680
3518039|F|0-43:G>C-43:G>C	LG1	126.212
3531505|F|0-54:C>A-54:C>A	LG1	126.876	Vfaba.Hedin2.R1g116560
18318889|F|0-61:T>C-61:T>C	LG1	126.876	Vfaba.Hedin2.R1g117360
3529371|F|0-27:A>T-27:A>T	LG1	126.876	Vfaba.Hedin2.R1g117280
3527522|F|0-22:T>C-22:T>C	LG1	127.208
3523432|F|0-8:A>G-8:A>G	LG1	127.54
3526731|F|0-22:T>C-22:T>C	LG1	128.873
3521588|F|0-45:C>G-45:C>G	LG1	129.538	Vfaba.Hedin2.R1g119840
3516165|F|0-7:A>G-7:A>G	LG1	129.538
3514819|F|0-12:G>A-12:G>A	LG1	129.538	Vfaba.Hedin2.R1.Ung032400
3510994|F|0-58:A>T-58:A>T	LG1	129.538
13864779|F|0-60:C>T-60:C>T	LG1	130.536	Vfaba.Hedin2.R1g119840
3511433|F|0-54:C>T-54:C>T	LG1	130.536
13864917|F|0-39:T>C-39:T>C	LG1	131.535	Vfaba.Hedin2.R1g121080
3511482|F|0-43:T>G-43:T>G	LG1	132.869
3522146|F|0-58:G>A-58:G>A	LG1	132.869	Vfaba.Hedin2.R1.4g181120.2
3521953|F|0-25:T>A-25:T>A	LG1	133.2	Vfaba.Hedin2.R1.3g134240
39974587|F|0-43:C>G-43:C>G	LG1	133.2	Vfaba.Hedin2.R1g123160
13869437|F|0-13:A>G-13:A>G	LG1	133.2	Vfaba.Hedin2.R1.3g134040
3518761|F|0-68:C>T-68:C>T	LG1	133.2	Vfaba.Hedin2.R1g124600
3522518|F|0-47:T>G-47:T>G	LG1	133.532	Vfaba.Hedin2.R1g122640
13909826|F|0-20:A>T-20:A>T	LG1	133.532
13912768|F|0-7:A>G-7:A>G	LG1	134.531
3506892|F|0-36:A>G-36:A>G	LG1	135.865
3508886|F|0-17:C>A-17:C>A	LG1	135.865
39979335|F|0-52:G>T-52:G>T	LG1	135.865	Vfaba.Hedin2.R1g126520.2
13904704|F|0-42:G>A-42:G>A	LG1	136.197
3512689|F|0-5:T>C-5:T>C	LG1	136.197
3530353|F|0-31:C>A-31:C>A	LG1	136.197
3507623|F|0-35:G>T-35:G>T	LG1	136.197
3512162|F|0-52:G>A-52:G>A	LG1	137.868
13909546|F|0-8:C>T-8:C>T	LG1	138.532
18318861|F|0-32:T>C-32:T>C	LG1	138.864	Vfaba.Hedin2.R1g129840
13909064|F|0-9:A>G-9:A>G	LG1	141.896	Vfaba.Hedin2.R1g132160
3523055|F|0-23:A>G-23:A>G	LG1	141.896	Vfaba.Hedin2.R1g135360
13868116|F|0-25:A>G-25:A>G	LG1	142.227	Vfaba.Hedin2.R1g133240
22857752|F|0-14:C>T-14:C>T	LG1	142.227
3513096|F|0-11:T>G-11:T>G	LG1	143.898
3509259|F|0-32:G>A-32:G>A	LG1	144.897
3523777|F|0-39:T>C-39:T>C	LG1	146.906
3524013|F|0-57:T>G-57:T>G	LG1	146.906
3524043|F|0-50:C>T-50:C>T	LG1	146.906	Vfaba.Hedin2.R1g137080
13869156|F|0-19:A>G-19:A>G	LG1	146.906
32613637|F|0-63:A>G-63:A>G	LG1	146.906
3507621|F|0-15:G>C-15:G>C	LG1	146.906
3519164|F|0-18:C>T-18:C>T	LG1	146.906
13907779|F|0-5:A>G-5:A>G	LG1	147.237
3507185|F|0-25:G>T-25:G>T	LG1	147.237	Vfaba.Hedin2.R1g050360
3511822|F|0-36:A>T-36:A>T	LG1	149.246
3508292|F|0-41:G>C-41:G>C	LG1	149.246
3531174|F|0-6:T>G-6:T>G	LG1	150.244
3508542|F|0-47:T>G-47:T>G	LG1	150.244
22857730|F|0-35:A>C-35:A>C	LG1	150.244	Vfaba.Hedin2.R1g141560
3522658|F|0-23:A>C-23:A>C	LG1	150.244
13913217|F|0-33:G>A-33:G>A	LG1	150.244	Vfaba.Hedin2.R1g140240
13904933|F|0-60:C>A-60:C>A	LG1	150.244
13865409|F|0-43:G>A-43:G>A	LG1	151.577	Vfaba.Hedin2.R1g143080
3522895|F|0-63:G>A-63:G>A	LG1	151.577	Vfaba.Hedin2.R1g143200
3523333|F|0-6:C>T-6:C>T	LG1	152.242
39979281|F|0-52:C>T-52:C>T	LG1	152.242	Vfaba.Hedin2.R1g144680
3522932|F|0-58:G>A-58:G>A	LG1	154.927
18319273|F|0-18:G>A-18:G>A	LG1	155.925	Vfaba.Hedin2.R1g159240
3515457|F|0-22:T>C-22:T>C	LG1	155.925
13906171|F|0-20:C>A-20:C>A	LG1	155.925
3517069|F|0-44:G>A-44:G>A	LG1	156.257
32610093|F|0-10:G>A-10:G>A	LG1	158.941
3532490|F|0-16:T>A-16:T>A	LG1	158.941
13904464|F|0-12:T>C-12:T>C	LG1	159.94	Vfaba.Hedin2.R1g149200.2
3524384|F|0-39:A>G-39:A>G	LG1	159.94
39982083|F|0-47:G>A-47:G>A	LG1	160.271
32608583|F|0-60:C>G-60:C>G	LG1	161.604	Vfaba.Hedin2.R1g149760
13911865|F|0-20:C>T-20:C>T	LG1	161.604
32610836|F|0-8:A>T-8:A>T	LG1	163.61
13866175|F|0-11:C>T-11:C>T	LG1	164.943
3507973|F|0-8:C>T-8:C>T	LG1	166.613	Vfaba.Hedin2.R1g152400
3512158|F|0-17:T>C-17:T>C	LG1	166.613
13904513|F|0-64:A>G-64:A>G	LG1	167.277	Vfaba.Hedin2.R1.Ung070200
32609644|F|0-27:A>G-27:A>G	LG1	168.946	Vfaba.Hedin2.R1g153920.2
3521000|F|0-68:T>G-68:T>G	LG1	168.946	Vfaba.Hedin2.R1.6g146840
3511405|F|0-66:T>C-66:T>C	LG1	169.278
3519585|F|0-12:G>A-12:G>A	LG1	169.278	Vfaba.Hedin2.R1g154520
3506796|F|0-29:G>C-29:G>C	LG1	170.947
3520909|F|0-33:A>C-33:A>C	LG1	171.279
13911170|F|0-11:C>T-11:C>T	LG1	172.612
3522693|F|0-8:T>G-8:T>G	LG1	172.944
3530479|F|0-68:G>T-68:G>T	LG1	173.275	Vfaba.Hedin2.R1g109760
3514834|F|0-8:A>C-8:A>C	LG1	174.273
3514847|F|0-61:C>T-61:C>T	LG1	174.605
3526993|F|0-53:A>G-53:A>G	LG1	174.605
3522229|F|0-9:G>A-9:G>A	LG1	174.605
3523362|F|0-63:G>A-63:G>A	LG1	175.269	Vfaba.Hedin2.R1g157280
39982350|F|0-7:C>T-7:C>T	LG1	175.934	Vfaba.Hedin2.R1g156760
3522872|F|0-52:A>G-52:A>G	LG1	175.934	Vfaba.Hedin2.R1g157360
13868490|F|0-15:C>T-15:C>T	LG1	175.934
3518284|F|0-13:C>T-13:C>T	LG1	176.932
3516289|F|0-35:C>T-35:C>T	LG1	177.263
3525810|F|0-67:A>G-67:A>G	LG1	177.595
3520536|F|0-37:A>G-37:A>G	LG1	178.593	Vfaba.Hedin2.R1g163040
3525681|F|0-47:C>T-47:C>T	LG1	178.925
3529643|F|0-6:T>C-6:T>C	LG1	178.925
3529537|F|0-66:T>A-66:T>A	LG1	178.925	Vfaba.Hedin2.R1.Ung007280
39972982|F|0-65:T>C-65:T>C	LG1	178.925	Vfaba.Hedin2.R1g163560
39972410|F|0-57:G>A-57:G>A	LG1	179.589	Vfaba.Hedin2.R1.Ung007280
13869267|F|0-8:C>T-8:C>T	LG1	179.921
22856752|F|0-27:C>T-27:C>T	LG1	179.921	Vfaba.Hedin2.R1.3g223200
22856752|F|0-14:T>C-14:T>C	LG1	179.921	Vfaba.Hedin2.R1.3g223200
3520192|F|0-16:C>T-16:C>T	LG1	181.253
13909124|F|0-17:A>T-17:A>T	LG1	182.251
3515201|F|0-49:A>C-49:A>C	LG1	182.583
3520627|F|0-14:T>G-14:T>G	LG1	182.583	Vfaba.Hedin2.R1.Ung046320
13865096|F|0-48:G>A-48:G>A	LG1	182.583	Vfaba.Hedin2.R1g166960
18320571|F|0-13:A>C-13:A>C	LG1	182.583	Vfaba.Hedin2.R1.Ung046320
13905419|F|0-62:A>G-62:A>G	LG1	183.247
32612696|F|0-45:C>T-45:C>T	LG1	184.245
3520847|F|0-23:A>G-23:A>G	LG1	184.91	Vfaba.Hedin2.R1g170200
39973859|F|0-10:G>A-10:G>A	LG1	186.579	Vfaba.Hedin2.R1g170520
3524254|F|0-56:T>C-56:T>C	LG1	186.579	Vfaba.Hedin2.R1g170440
32609554|F|0-33:T>C-33:T>C	LG1	187.244
3518737|F|0-14:G>A-14:G>A	LG1	188.914
3523264|F|0-57:A>G-57:A>G	LG1	189.578	Vfaba.Hedin2.R1g174720
39982894|F|0-17:T>C-17:T>C	LG1	191.585	Vfaba.Hedin2.R1g191720
32612893|F|0-36:T>C-36:T>C	LG1	191.585
39973905|F|0-64:G>A-64:G>A	LG1	191.916
3518595|F|0-56:T>C-56:T>C	LG1	192.581
3507020|F|0-22:A>G-22:A>G	LG1	192.581
3522031|F|0-68:A>G-68:A>G	LG1	192.581	Vfaba.Hedin2.R1g183520
3532561|F|0-20:T>C-20:T>C	LG1	192.581
3527738|F|0-55:G>A-55:G>A	LG1	192.912	Vfaba.Hedin2.R1g190640
3528061|F|0-20:T>C-20:T>C	LG1	192.912
32610234|F|0-55:C>G-55:C>G	LG1	193.911
3531205|F|0-34:C>G-34:C>G	LG1	193.911
3523917|F|0-39:C>T-39:C>T	LG1	193.911
3516693|F|0-52:C>T-52:C>T	LG1	193.911	Vfaba.Hedin2.R1g189200
3531779|F|0-21:A>G-21:A>G	LG1	193.911
3518041|F|0-29:C>T-29:C>T	LG1	193.911
13904612|F|0-64:T>G-64:T>G	LG1	194.575	Vfaba.Hedin2.R1g178280
39979695|F|0-43:C>A-43:C>A	LG1	194.575	Vfaba.Hedin2.R1g175840
39978922|F|0-52:C>A-52:C>A	LG1	194.575
3515703|F|0-7:C>A-7:C>A	LG1	194.575
3512151|F|0-14:T>G-14:T>G	LG1	194.575
3523325|F|0-9:A>G-9:A>G	LG1	195.24	Vfaba.Hedin2.R1g173560
13909186|F|0-57:C>T-57:C>T	LG1	195.24	Vfaba.Hedin2.R1g173160
39977468|F|0-15:T>C-15:T>C	LG1	195.24	Vfaba.Hedin2.R1g173800
13910923|F|0-12:T>C-12:T>C	LG1	195.24	Vfaba.Hedin2.R1.5g173160
3522233|F|0-21:C>T-21:C>T	LG1	195.571	Vfaba.Hedin2.R1g175080
3507430|F|0-44:T>A-44:T>A	LG1	195.571
3523549|F|0-10:A>G-10:A>G	LG1	196.905
3523920|F|0-44:C>T-44:C>T	LG1	196.905	Vfaba.Hedin2.R1g185320
39980712|F|0-5:C>T-5:C>T	LG1	198.912
32611783|F|0-31:T>C-31:T>C	LG1	198.912
3520807|F|0-68:C>T-68:C>T	LG1	199.576	Vfaba.Hedin2.R1g181680
3519212|F|0-8:C>T-8:C>T	LG1	201.245	Vfaba.Hedin2.R1g225280
18318887|F|0-15:G>A-15:G>A	LG1	205.661	Vfaba.Hedin2.R1g195000
3523433|F|0-63:A>G-63:A>G	LG1	209.387	Vfaba.Hedin2.R1g197000
3521011|F|0-26:G>A-26:G>A	LG1	209.387	Vfaba.Hedin2.R1g197560
39979822|F|0-16:T>A-16:T>A	LG1	211.399	Vfaba.Hedin2.R1g202080
3523455|F|0-28:C>T-28:C>T	LG1	211.399	Vfaba.Hedin2.R1g124040
13911005|F|0-20:G>A-20:G>A	LG1	211.399	Vfaba.Hedin2.R1g198680
3521477|F|0-38:G>A-38:G>A	LG1	211.73
39980138|F|0-21:A>C-21:A>C	LG1	211.73
32613137|F|0-53:C>T-53:C>T	LG1	212.062
3519851|F|0-48:G>C-48:G>C	LG1	212.062	Vfaba.Hedin2.R1g200560.2
3515923|F|0-57:A>G-57:A>G	LG1	213.398	Vfaba.Hedin2.R1g073280
13864898|F|0-55:A>T-55:A>T	LG1	213.398
13908693|F|0-15:C>G-15:C>G	LG1	213.729	Vfaba.Hedin2.R1.Ung091160.2
3523585|F|0-67:C>T-67:C>T	LG1	215.402
3527398|F|0-40:G>C-40:G>C	LG1	215.402	Vfaba.Hedin2.R1g207480
3521914|F|0-18:G>A-18:G>A	LG1	215.402	Vfaba.Hedin2.R1g207440
3522684|F|0-24:A>G-24:A>G	LG1	215.402
13864722|F|0-8:T>C-8:T>C	LG1	216.738	Vfaba.Hedin2.R1g207480
3515524|F|0-67:T>C-67:T>C	LG1	216.738
3524571|F|0-10:A>G-10:A>G	LG1	218.749
3528345|F|0-56:A>G-56:A>G	LG1	222.475
32610112|F|0-31:G>A-31:G>A	LG1	222.475
22857448|F|0-29:A>C-29:A>C	LG1	222.475
32610478|F|0-35:G>A-35:G>A	LG1	222.475	Vfaba.Hedin2.R1g209200
13868257|F|0-14:A>G-14:A>G	LG1	222.475
39981867|F|0-7:T>G-7:T>G	LG1	222.807
3507376|F|0-49:G>A-49:G>A	LG1	222.807
3529745|F|0-30:C>T-30:C>T	LG1	223.138
3522307|F|0-55:A>C-55:A>C	LG1	223.138
32608419|F|0-37:T>G-37:T>G	LG1	224.137
3518569|F|0-59:C>A-59:C>A	LG1	224.137
32609723|F|0-12:A>C-12:A>C	LG1	224.802
13868607|F|0-13:A>G-13:A>G	LG1	224.802
39974135|F|0-65:G>A-65:G>A	LG1	225.134	Vfaba.Hedin2.R1.3g060400
3519728|F|0-8:G>C-8:G>C	LG1	226.469
3531285|F|0-6:T>C-6:T>C	LG1	226.469
3523428|F|0-28:A>T-28:A>T	LG1	227.468
3523773|F|0-24:C>T-24:C>T	LG1	227.468
3527349|F|0-48:A>G-48:A>G	LG1	227.799
13869152|F|0-19:C>A-19:C>A	LG1	227.799
39982785|F|0-64:C>G-64:C>G	LG1	227.799
3519339|F|0-60:T>C-60:T>C	LG1	227.799
13912974|F|0-26:T>A-26:T>A	LG1	227.799	Vfaba.Hedin2.R1.3g030040
3521624|F|0-33:T>A-33:T>A	LG1	228.131	Vfaba.Hedin2.R1g216720
3522712|F|0-24:A>G-24:A>G	LG1	228.463
3519348|F|0-61:T>C-61:T>C	LG1	228.463
3523078|F|0-66:T>C-66:T>C	LG1	228.463	Vfaba.Hedin2.R1g223520
13909021|F|0-60:G>C-60:G>C	LG1	228.463
32610937|F|0-12:A>G-12:A>G	LG1	229.128
39981596|F|0-25:G>T-25:G>T	LG1	229.792
13868482|F|0-42:A>G-42:A>G	LG1	229.792	Vfaba.Hedin2.R1g222520
39977205|F|0-60:T>A-60:T>A	LG1	229.792	Vfaba.Hedin2.R1g222680
13913628|F|0-35:C>T-35:C>T	LG1	229.792
22857686|F|0-46:C>A-46:C>A	LG1	230.124
32612336|F|0-38:C>T-38:C>T	LG1	230.456
3527058|F|0-7:C>T-7:C>T	LG1	231.12	Vfaba.Hedin2.R1.3g063560
3523440|F|0-17:A>C-17:A>C	LG1	232.12
32611082|F|0-55:C>A-55:C>A	LG1	232.451
13910765|F|0-37:T>A-37:T>A	LG1	232.451	Vfaba.Hedin2.R1g218840
3522074|F|0-50:A>G-50:A>G	LG1	233.116
3522683|F|0-23:A>G-23:A>G	LG1	233.448
3524793|F|0-51:G>A-51:G>A	LG1	233.448	Vfaba.Hedin2.R1g225440
3521047|F|0-57:A>G-57:A>G	LG1	234.113
39974828|F|0-49:A>C-49:A>C	LG1	234.113
3511742|F|0-16:G>A-16:G>A	LG1	234.113
3517515|F|0-24:G>A-24:G>A	LG1	234.777
13866740|F|0-39:G>A-39:G>A	LG1	234.777
32612458|F|0-18:T>C-18:T>C	LG1	235.442
3526873|F|0-27:G>C-27:G>C	LG1	235.442	Vfaba.Hedin2.R1.6g187840
3520747|F|0-35:T>C-35:T>C	LG1	235.442
32612510|F|0-50:C>G-50:C>G	LG1	235.442
13863728|F|0-53:T>C-53:T>C	LG1	235.442	Vfaba.Hedin2.R1g071680
3523894|F|0-43:G>A-43:G>A	LG1	235.442	Vfaba.Hedin2.R1g227680
18319064|F|0-54:C>T-54:C>T	LG1	235.442	Vfaba.Hedin2.R1g229120
39976943|F|0-29:T>C-29:T>C	LG1	235.442
3523164|F|0-14:G>C-14:G>C	LG1	238.826
13865589|F|0-66:T>G-66:T>G	LG1	238.826
3514794|F|0-45:C>A-45:C>A	LG1	238.826
22857986|F|0-57:T>A-57:T>A	LG1	238.826	Vfaba.Hedin2.R1g231400
13908934|F|0-64:G>A-64:G>A	LG1	239.49	Vfaba.Hedin2.R1.Ung111720
3520158|F|0-6:T>A-6:T>A	LG1	239.822	Vfaba.Hedin2.R1g232960
3520678|F|0-56:G>C-56:G>C	LG1	242.173
3512326|F|0-15:C>G-15:C>G	LG1	242.173
3509613|F|0-45:A>C-45:A>C	LG1	242.505
3513947|F|0-6:G>A-6:G>A	LG1	242.836
32613376|F|0-12:T>C-12:T>C	LG1	242.836	Vfaba.Hedin2.R1g235440
3521752|F|0-67:C>T-67:C>T	LG1	242.836	Vfaba.Hedin2.R1g235200
3520321|F|0-22:G>A-22:G>A	LG1	245.188
18320997|F|0-26:A>G-26:A>G	LG1	245.188
3519049|F|0-38:T>C-38:T>C	LG1	246.187
3518993|F|0-55:T>A-55:T>A	LG1	246.187
18320331|F|0-66:T>G-66:T>G	LG1	246.187	Vfaba.Hedin2.R1g237600
13909069|F|0-22:T>C-22:T>C	LG1	247.522	Vfaba.Hedin2.R1g238800
3526089|F|0-43:A>T-43:A>T	LG1	247.522
3513703|F|0-20:T>A-20:T>A	LG1	247.522
3511926|F|0-9:G>T-9:G>T	LG1	247.522
3524686|F|0-20:A>G-20:A>G	LG1	247.854
3524438|F|0-12:C>T-12:C>T	LG1	248.186
3515672|F|0-33:C>T-33:C>T	LG1	248.517	Vfaba.Hedin2.R1.2g205280
3510603|F|0-42:T>C-42:T>C	LG1	248.517
39974282|F|0-23:G>A-23:G>A	LG1	249.516	Vfaba.Hedin2.R1g241240
3522068|F|0-17:G>C-17:G>C	LG1	249.516	Vfaba.Hedin2.R1g240880
13909679|F|0-26:C>G-26:C>G	LG1	249.848
3525085|F|0-45:T>C-45:T>C	LG1	250.513	Vfaba.Hedin2.R1g240360
3521756|F|0-12:G>T-12:G>T	LG1	250.513
3512576|F|0-16:A>T-16:A>T	LG1	250.513
3521175|F|0-53:A>G-53:A>G	LG1	251.512
3531769|F|0-7:A>G-7:A>G	LG1	252.177
3514987|F|0-29:G>T-29:G>T	LG1	253.511
3513046|F|0-60:T>A-60:T>A	LG1	253.511	Vfaba.Hedin2.R1g244360
3519388|F|0-44:G>C-44:G>C	LG1	253.511	Vfaba.Hedin2.R1g243880
3519388|F|0-67:C>A-67:C>A	LG1	253.511	Vfaba.Hedin2.R1g243880
3519388|F|0-60:T>A-60:T>A	LG1	253.511	Vfaba.Hedin2.R1g243880
13908855|F|0-66:C>T-66:C>T	LG1	253.511
39979248|F|0-7:G>T-7:G>T	LG1	253.511
3519388|F|0-57:T>G-57:T>G	LG1	253.511	Vfaba.Hedin2.R1g243880
13868793|F|0-8:A>G-8:A>G	LG1	254.176
3508129|F|0-45:G>A-45:G>A	LG1	255.847	Vfaba.Hedin2.R1.4g156600
3521169|F|0-8:G>A-8:G>A	LG1	255.847	Vfaba.Hedin2.R1g246160
39977985|F|0-11:A>G-11:A>G	LG1	255.847
3507453|F|0-57:G>A-57:G>A	LG1	255.847	Vfaba.Hedin2.R1g246160
3530954|F|0-51:T>C-51:T>C	LG1	255.847	Vfaba.Hedin2.R1g246160
13912643|F|0-5:T>C-5:T>C	LG1	257.518
3515746|F|0-63:A>T-63:A>T	LG1	258.183
3522066|F|0-26:C>G-26:C>G	LG1	258.183	Vfaba.Hedin2.R1g248000
39977012|F|0-6:A>C-6:A>C	LG1	258.183
3523434|F|0-8:C>G-8:C>G	LG1	258.183
3525638|F|0-5:G>A-5:G>A	LG1	258.183	Vfaba.Hedin2.R1.2g076520
3524097|F|0-25:G>A-25:G>A	LG1	258.183
13909242|F|0-24:C>T-24:C>T	LG1	259.181
3532445|F|0-6:T>A-6:T>A	LG1	260.18	Vfaba.Hedin2.R1g249680
3515497|F|0-67:G>T-67:G>T	LG1	261.514	Vfaba.Hedin2.R1g250360
3521133|F|0-12:C>T-12:C>T	LG1	262.179
32613220|F|0-57:G>A-57:G>A	LG1	262.51
3523992|F|0-15:A>G-15:A>G	LG1	262.51
3531947|F|0-34:A>G-34:A>G	LG1	262.51	Vfaba.Hedin2.R1g251200
3510192|F|0-10:G>A-10:G>A	LG1	262.842	Vfaba.Hedin2.R1g251200
3521063|F|0-39:C>T-39:C>T	LG1	262.842	Vfaba.Hedin2.R1g251200
3516014|F|0-47:C>A-47:C>A	LG1	264.85
3531308|F|0-67:C>A-67:C>A	LG1	265.182
39973589|F|0-30:G>A-30:G>A	LG1	266.516
3529450|F|0-35:G>C-35:G>C	LG1	267.514
13913109|F|0-17:T>C-17:T>C	LG1	267.846
13912212|F|0-52:C>T-52:C>T	LG1	268.511
3512374|F|0-54:A>G-54:A>G	LG1	268.511
3509498|F|0-65:C>T-65:C>T	LG1	272.581
3523925|F|0-27:C>T-27:C>T	LG1	273.58	Vfaba.Hedin2.R1.6g114520
3522619|F|0-65:G>A-65:G>A	LG1	273.58
13911596|F|0-14:A>C-14:A>C	LG1	276.27	Vfaba.Hedin2.R1g264040
13908894|F|0-5:G>C-5:G>C	LG1	276.27
3521744|F|0-10:C>T-10:C>T	LG1	276.601	Vfaba.Hedin2.R1g263400
3523553|F|0-32:T>C-32:T>C	LG1	277.266
3520354|F|0-10:C>A-10:C>A	LG1	277.266
39982992|F|0-17:T>A-17:T>A	LG1	277.266
3508191|F|0-27:T>A-27:T>A	LG1	277.266
3515986|F|0-28:A>G-28:A>G	LG1	277.266	Vfaba.Hedin2.R1g261920
13908896|F|0-61:T>C-61:T>C	LG1	277.598	Vfaba.Hedin2.R1g262280
13908994|F|0-52:A>T-52:A>T	LG1	277.598
3517633|F|0-21:G>T-21:G>T	LG1	278.597
3527872|F|0-19:A>T-19:A>T	LG1	279.261
13904583|F|0-17:A>G-17:A>G	LG1	279.261	Vfaba.Hedin2.R1g265440
3522165|F|0-52:A>G-52:A>G	LG1	279.261
3513942|F|0-21:C>T-21:C>T	LG1	280.596
13866671|F|0-11:T>A-11:T>A	LG1	282.605
13866825|F|0-43:G>T-43:G>T	LG1	282.605
22858140|F|0-34:C>A-34:C>A	LG1	282.605
3510953|F|0-37:T>A-37:T>A	LG1	282.937	Vfaba.Hedin2.R1g267240
3518143|F|0-49:T>C-49:T>C	LG1	283.268	Vfaba.Hedin2.R1g267840
3521262|F|0-42:C>T-42:C>T	LG1	284.267	Vfaba.Hedin2.R1g269200
3519273|F|0-31:T>C-31:T>C	LG1	284.931
13911666|F|0-22:T>G-22:T>G	LG1	285.263
39978999|F|0-55:A>C-55:A>C	LG1	286.262	Vfaba.Hedin2.R1g087840
3522740|F|0-26:T>C-26:T>C	LG1	286.262	Vfaba.Hedin2.R1g270320
13909482|F|0-12:C>T-12:C>T	LG1	286.262
3526394|F|0-18:G>C-18:G>C	LG1	286.926	Vfaba.Hedin2.R1g270520
3521617|F|0-12:T>C-12:T>C	LG1	286.926	Vfaba.Hedin2.R1g270680
13912790|F|0-26:G>T-26:G>T	LG1	287.591	Vfaba.Hedin2.R1g271360
3520174|F|0-62:C>G-62:C>G	LG1	287.591
39977754|F|0-10:G>C-10:G>C	LG1	287.591	Vfaba.Hedin2.R1g272440
39979841|F|0-58:A>T-58:A>T	LG1	290.623
13864763|F|0-41:A>G-41:A>G	LG1	290.623
39983115|F|0-38:T>C-38:T>C	LG1	290.623
32610936|F|0-8:A>G-8:A>G	LG1	290.623
3530182|F|0-16:C>T-16:C>T	LG1	290.955
13891416|F|0-22:G>A-22:G>A	LG1	292.289	Vfaba.Hedin2.R1.Ung027800
13866480|F|0-44:C>T-44:C>T	LG1	292.621
3521973|F|0-8:G>A-8:G>A	LG1	293.286	Vfaba.Hedin2.R1g275920
3530959|F|0-14:T>G-14:T>G	LG1	293.286
3507902|F|0-26:T>A-26:T>A	LG1	293.617
3521690|F|0-34:G>A-34:G>A	LG1	293.949	Vfaba.Hedin2.R1g279760
39978564|F|0-11:G>A-11:G>A	LG1	294.281
3515932|F|0-54:C>T-54:C>T	LG1	294.281
32611605|F|0-56:G>A-56:G>A	LG1	294.281	Vfaba.Hedin2.R1.6g085880
39972649|F|0-36:G>A-36:G>A	LG1	294.281	Vfaba.Hedin2.R1g275800
3523280|F|0-12:T>C-12:T>C	LG1	295.28	Vfaba.Hedin2.R1g276800
3516729|F|0-63:A>G-63:A>G	LG1	295.28	Vfaba.Hedin2.R1g277480
3515289|F|0-15:C>T-15:C>T	LG1	296.614
3519910|F|0-41:C>T-41:C>T	LG1	297.279	Vfaba.Hedin2.R1g281080
3519048|F|0-38:T>C-38:T>C	LG1	299.29	Vfaba.Hedin2.R1g283560
13909086|F|0-22:C>T-22:C>T	LG1	299.29	Vfaba.Hedin2.R1g282800.2
18320234|F|0-35:G>C-35:G>C	LG1	299.29	Vfaba.Hedin2.R1g283000
3513610|F|0-33:C>T-33:C>T	LG1	299.29
32610075|F|0-14:G>A-14:G>A	LG1	299.621
3524271|F|0-68:T>C-68:T>C	LG1	299.621	Vfaba.Hedin2.R1.3g228800
3519234|F|0-33:A>G-33:A>G	LG1	301.631	Vfaba.Hedin2.R1g284040
3509249|F|0-26:G>A-26:G>A	LG1	301.631
13908675|F|0-7:C>T-7:C>T	LG1	303.641
3518734|F|0-46:A>G-46:A>G	LG1	303.641	Vfaba.Hedin2.R1g284880
3527867|F|0-23:G>A-23:G>A	LG1	304.305
13865500|F|0-56:G>A-56:G>A	LG1	304.305	Vfaba.Hedin2.R1g282800.3
3522556|F|0-41:G>A-41:G>A	LG1	304.305
3524177|F|0-42:T>C-42:T>C	LG1	306.315
18320575|F|0-24:T>A-24:T>A	LG1	306.98	Vfaba.Hedin2.R1g285720
3509503|F|0-37:G>T-37:G>T	LG1	306.98
3521121|F|0-43:A>C-43:A>C	LG1	308.989	Vfaba.Hedin2.R1g288720
3530850|F|0-19:C>T-19:C>T	LG1	308.989
3517252|F|0-34:C>A-34:C>A	LG1	309.654
39981711|F|0-59:G>A-59:G>A	LG1	310.653
3523931|F|0-30:A>G-30:A>G	LG1	310.653	Vfaba.Hedin2.R1g287640
3520023|F|0-6:A>G-6:A>G	LG1	310.985
13904661|F|0-43:A>G-43:A>G	LG1	310.985	Vfaba.Hedin2.R1.Ung094360
3510622|F|0-40:C>T-40:C>T	LG1	311.984
32608544|F|0-24:A>T-24:A>T	LG1	311.984	Vfaba.Hedin2.R1g289200
13908987|F|0-52:A>G-52:A>G	LG1	311.984
13913312|F|0-33:A>C-33:A>C	LG1	311.984	Vfaba.Hedin2.R1g289200
3521283|F|0-33:C>T-33:C>T	LG1	312.649	Vfaba.Hedin2.R1g289800
3526553|F|0-7:G>A-7:G>A	LG1	312.649
3523671|F|0-21:A>T-21:A>T	LG1	312.649
3517702|F|0-27:T>C-27:T>C	LG1	312.98
3514197|F|0-66:A>C-66:A>C	LG1	313.645
3508031|F|0-31:T>C-31:T>C	LG1	313.977	Vfaba.Hedin2.R1g291680
3513212|F|0-29:T>C-29:T>C	LG1	314.309
13912048|F|0-10:C>T-10:C>T	LG1	314.309
3518199|F|0-6:A>C-6:A>C	LG1	314.309
39972564|F|0-28:A>G-28:A>G	LG1	314.309	Vfaba.Hedin2.R1g290320
39974041|F|0-15:T>C-15:T>C	LG1	315.981	Vfaba.Hedin2.R1g292200
3509071|F|0-64:C>T-64:C>T	LG1	316.646	Vfaba.Hedin2.R1g293240.3
3519809|F|0-60:G>C-60:G>C	LG1	316.646
3520687|F|0-35:C>G-35:C>G	LG1	316.646
3531935|F|0-41:C>A-41:C>A	LG1	317.311	Vfaba.Hedin2.R1g293680
3519454|F|0-47:C>T-47:C>T	LG1	317.311	Vfaba.Hedin2.R1.Ung041200
39982009|F|0-54:T>C-54:T>C	LG1	318.645	Vfaba.Hedin2.R1g294560
32610298|F|0-63:G>A-63:G>A	LG1	318.977	Vfaba.Hedin2.R1g295000
3516107|F|0-52:G>C-52:G>C	LG1	319.976
3516254|F|0-49:T>G-49:T>G	LG1	320.975
3507447|F|0-35:A>T-35:A>T	LG1	321.307	Vfaba.Hedin2.R1g296120
3519245|F|0-66:A>T-66:A>T	LG1	321.307	Vfaba.Hedin2.R1g296800
13867111|F|0-22:G>C-22:G>C	LG1	321.307
39982913|F|0-51:G>A-51:G>A	LG1	321.971	Vfaba.Hedin2.R1g297680
3526823|F|0-41:T>C-41:T>C	LG1	321.971	Vfaba.Hedin2.R1.Ung055600
3508725|F|0-30:C>T-30:C>T	LG1	322.303	Vfaba.Hedin2.R1g298280
3507081|F|0-30:C>T-30:C>T	LG1	322.303	Vfaba.Hedin2.R1.6g071120
3524424|F|0-66:A>G-66:A>G	LG1	322.303
3530415|F|0-25:C>T-25:C>T	LG1	322.303
3526624|F|0-31:T>G-31:T>G	LG1	323.302
3507333|F|0-37:C>T-37:C>T	LG1	323.634	Vfaba.Hedin2.R1g299360
3515090|F|0-45:C>G-45:C>G	LG1	323.966	Vfaba.Hedin2.R1g300240
39979556|F|0-25:T>G-25:T>G	LG1	324.297	Vfaba.Hedin2.R1g300240
3510963|F|0-29:A>C-29:A>C	LG1	325.296	Vfaba.Hedin2.R1g300520
3523512|F|0-60:T>C-60:T>C	LG1	326.63	Vfaba.Hedin2.R1g302160
13910625|F|0-65:G>A-65:G>A	LG1	326.962
3509015|F|0-6:T>C-6:T>C	LG1	326.962
13911709|F|0-47:A>C-47:A>C	LG1	326.962
13868250|F|0-8:G>C-8:G>C	LG1	326.962
22857685|F|0-17:G>A-17:G>A	LG1	326.962
39982575|F|0-67:T>G-67:T>G	LG1	328.971	Vfaba.Hedin2.R1g304680
3523659|F|0-27:A>G-27:A>G	LG1	330.641
13911086|F|0-23:C>A-23:C>A	LG1	330.641
39975484|F|0-29:A>G-29:A>G	LG1	331.305	Vfaba.Hedin2.R1g305560
3516928|F|0-63:A>G-63:A>G	LG1	331.637	Vfaba.Hedin2.R1g307120
3524190|F|0-58:G>A-58:G>A	LG1	331.637
3523837|F|0-18:T>C-18:T>C	LG1	332.302
3520003|F|0-11:C>A-11:C>A	LG1	332.302
3523271|F|0-49:A>T-49:A>T	LG1	332.302
3515368|F|0-50:T>G-50:T>G	LG1	332.302	Vfaba.Hedin2.R1g307880.2
3529493|F|0-16:A>G-16:A>G	LG1	332.302	Vfaba.Hedin2.R1.4g201280
3525957|F|0-55:T>C-55:T>C	LG1	332.302	Vfaba.Hedin2.R1g308160
3531050|F|0-16:A>T-16:A>T	LG1	332.302
3527700|F|0-22:T>C-22:T>C	LG1	332.302
18319279|F|0-48:T>C-48:T>C	LG1	333.636
3517322|F|0-23:G>A-23:G>A	LG1	333.968
3532473|F|0-58:C>G-58:C>G	LG1	334.299
13864951|F|0-47:C>T-47:C>T	LG1	334.299	Vfaba.Hedin2.R1.Ung099840
3523121|F|0-57:T>C-57:T>C	LG1	334.631	Vfaba.Hedin2.R1.3g208480
3523267|F|0-51:G>T-51:G>T	LG1	334.963	Vfaba.Hedin2.R1g311480
39982348|F|0-68:A>G-68:A>G	LG1	334.963
3523984|F|0-20:C>T-20:C>T	LG1	334.963	Vfaba.Hedin2.R1g315120
3520717|F|0-17:A>G-17:A>G	LG1	335.961
3520717|F|0-67:A>T-67:A>T	LG1	335.961
39983162|F|0-21:A>G-21:A>G	LG1	335.961	Vfaba.Hedin2.R1g312400
13909859|F|0-7:C>T-7:C>T	LG1	336.293
3524895|F|0-16:C>T-16:C>T	LG1	336.625
3517754|F|0-36:C>T-36:C>T	LG1	337.623
3527849|F|0-59:G>A-59:G>A	LG1	337.955
3507481|F|0-39:A>T-39:A>T	LG1	338.287
3513936|F|0-14:T>C-14:T>C	LG1	338.951
39977007|F|0-43:G>T-43:G>T	LG1	340.959
3522493|F|0-12:A>T-12:A>T	LG1	340.959
13911623|F|0-51:C>T-51:C>T	LG1	341.291
3523126|F|0-11:A>G-11:A>G	LG1	341.291
13911815|F|0-54:A>G-54:A>G	LG1	341.291
3519755|F|0-52:G>T-52:G>T	LG1	341.291
3526431|F|0-45:T>A-45:T>A	LG1	342.962
3528757|F|0-13:G>A-13:G>A	LG1	343.293	Vfaba.Hedin2.R1g321120
39983136|F|0-65:G>C-65:G>C	LG1	343.625
13910890|F|0-68:T>C-68:T>C	LG1	344.958
39983027|F|0-53:T>C-53:T>C	LG1	345.29	Vfaba.Hedin2.R1g323040
3508168|F|0-60:T>C-60:T>C	LG1	346.623	Vfaba.Hedin2.R1g324560
13867401|F|0-66:A>T-66:A>T	LG1	346.955	Vfaba.Hedin2.R1g326600
3532601|F|0-32:A>G-32:A>G	LG1	346.955
39972718|F|0-23:T>C-23:T>C	LG1	346.955
3520094|F|0-30:A>T-30:A>T	LG1	347.953
13909208|F|0-63:A>C-63:A>C	LG1	347.953	Vfaba.Hedin2.R1g323720
3523217|F|0-12:T>C-12:T>C	LG1	349.96	Vfaba.Hedin2.R1g327320
3513485|F|0-63:T>A-63:T>A	LG1	350.625	Vfaba.Hedin2.R1g327320
3514325|F|0-32:G>A-32:G>A	LG1	351.958
39978367|F|0-5:T>A-5:T>A	LG1	351.958
32611965|F|0-30:T>C-30:T>C	LG1	351.958
3515616|F|0-29:A>T-29:A>T	LG1	351.958
13909038|F|0-35:C>A-35:C>A	LG1	352.289
3507617|F|0-62:G>A-62:G>A	LG1	353.288	Vfaba.Hedin2.R1g330160
3521701|F|0-37:T>A-37:T>A	LG1	353.288	Vfaba.Hedin2.R1g330200
13868528|F|0-19:T>C-19:T>C	LG1	353.952	Vfaba.Hedin2.R1g329600
3529218|F|0-24:G>T-24:G>T	LG1	353.952	Vfaba.Hedin2.R1g330200
3531350|F|0-61:T>C-61:T>C	LG1	353.952
32612348|F|0-36:T>C-36:T>C	LG1	355.959
3532368|F|0-40:A>G-40:A>G	LG1	355.959
13908718|F|0-51:G>A-51:G>A	LG1	355.959	Vfaba.Hedin2.R1g332600
3524281|F|0-66:A>G-66:A>G	LG1	355.959
3520579|F|0-60:G>C-60:G>C	LG1	355.959
13913086|F|0-17:T>C-17:T>C	LG1	355.959	Vfaba.Hedin2.R1.6g015040
3523424|F|0-58:A>G-58:A>G	LG1	355.959
13865304|F|0-30:G>A-30:G>A	LG1	357.293	Vfaba.Hedin2.R1g333240
3511723|F|0-61:T>C-61:T>C	LG1	357.293
13865016|F|0-44:T>C-44:T>C	LG1	358.963	Vfaba.Hedin2.R1g335320
3522890|F|0-41:T>C-41:T>C	LG1	358.963
3527611|F|0-50:T>C-50:T>C	LG1	359.295
39983235|F|0-34:C>G-34:C>G	LG1	359.295
3528361|F|0-22:A>G-22:A>G	LG1	359.295	Vfaba.Hedin2.R1g335520
39981853|F|0-7:C>G-7:C>G	LG1	360.965
13864870|F|0-47:G>T-47:G>T	LG1	361.629
13905070|F|0-52:G>A-52:G>A	LG1	361.629	Vfaba.Hedin2.R1g336720
3521634|F|0-30:G>A-30:G>A	LG1	361.629
3532243|F|0-57:G>A-57:G>A	LG1	361.961
3527334|F|0-21:G>A-21:G>A	LG1	362.293	Vfaba.Hedin2.R1g338160
13904297|F|0-17:C>T-17:C>T	LG1	363.291
32612027|F|0-36:G>C-36:G>C	LG1	363.291	Vfaba.Hedin2.R1.3g107760
32610363|F|0-11:C>A-11:C>A	LG1	363.291	Vfaba.Hedin2.R1g338160
3523220|F|0-52:A>G-52:A>G	LG1	363.291	Vfaba.Hedin2.R1g338240
3506989|F|0-66:C>T-66:C>T	LG1	364.961	Vfaba.Hedin2.R1g338680
3517378|F|0-46:C>A-46:C>A	LG1	365.293
3509445|F|0-20:C>T-20:C>T	LG1	365.293
3518821|F|0-27:C>T-27:C>T	LG1	365.293
39972787|F|0-29:C>T-29:C>T	LG1	365.958	Vfaba.Hedin2.R1g338840
3516894|F|0-8:G>A-8:G>A	LG1	366.956	Vfaba.Hedin2.R1.6g130160
39982082|F|0-20:T>G-20:T>G	LG1	367.954	Vfaba.Hedin2.R1g341800
22855841|F|0-24:T>C-24:T>C	LG1	369.624
3527158|F|0-59:T>C-59:T>C	LG1	369.624	Vfaba.Hedin2.R1g343880
3510139|F|0-10:C>T-10:C>T	LG1	369.624	Vfaba.Hedin2.R1g342120.3
3520190|F|0-29:G>A-29:G>A	LG1	370.623
22857527|F|0-25:A>G-25:A>G	LG1	370.623	Vfaba.Hedin2.R1g343480
3529046|F|0-56:C>T-56:C>T	LG1	370.623	Vfaba.Hedin2.R1.2g162040
3523225|F|0-49:C>T-49:C>T	LG1	370.954	Vfaba.Hedin2.R1g343880
3523814|F|0-24:T>C-24:T>C	LG1	370.954	Vfaba.Hedin2.R1g341560
13866765|F|0-65:G>A-65:G>A	LG1	370.954	Vfaba.Hedin2.R1g341240
3512189|F|0-24:A>T-24:A>T	LG1	371.286
13910746|F|0-8:A>T-8:A>T	LG1	371.618
18321138|F|0-28:A>G-28:A>G	LG1	372.282	Vfaba.Hedin2.R1g345720
3524564|F|0-46:T>G-46:T>G	LG1	372.282	Vfaba.Hedin2.R1g345760
13869154|F|0-39:A>C-39:A>C	LG1	372.282	Vfaba.Hedin2.R1.3g108680
3526997|F|0-53:G>C-53:G>C	LG1	372.282
18318756|F|0-12:A>G-12:A>G	LG1	373.28	Vfaba.Hedin2.R1g345720
13866695|F|0-63:C>T-63:C>T	LG1	373.945
3528365|F|0-7:G>T-7:G>T	LG1	373.945
13904338|F|0-33:G>A-33:G>A	LG1	373.945	Vfaba.Hedin2.R1g344240
13869678|F|0-22:C>T-22:C>T	LG1	374.609	Vfaba.Hedin2.R1g342440
3518603|F|0-18:T>C-18:T>C	LG1	374.609
39974583|F|0-8:C>G-8:C>G	LG1	374.609
3508102|F|0-30:T>G-30:T>G	LG1	375.943
3521574|F|0-27:A>G-27:A>G	LG1	375.943
3520998|F|0-38:C>T-38:C>T	LG1	376.942	Vfaba.Hedin2.R1g343160
39978224|F|0-50:T>C-50:T>C	LG1	379.972	Vfaba.Hedin2.R1g347400
13904961|F|0-10:G>A-10:G>A	LG1	379.972
13909004|F|0-36:C>T-36:C>T	LG1	379.972	Vfaba.Hedin2.R1g348320
32610391|F|0-27:T>C-27:T>C	LG1	379.972
13909525|F|0-30:A>G-30:A>G	LG1	380.304
3522337|F|0-54:A>G-54:A>G	LG1	380.304	Vfaba.Hedin2.R1g348040
3517838|F|0-27:A>C-27:A>C	LG1	380.304	Vfaba.Hedin2.R1g348040
3521774|F|0-8:C>T-8:C>T	LG1	380.968	Vfaba.Hedin2.R1g349600
3524153|F|0-25:A>T-25:A>T	LG1	381.3
3525292|F|0-51:T>A-51:T>A	LG1	381.964
3516005|F|0-48:A>G-48:A>G	LG1	382.962	Vfaba.Hedin2.R1g352480.2
3524691|F|0-21:G>T-21:G>T	LG1	382.962
13865346|F|0-31:T>C-31:T>C	LG1	383.294	Vfaba.Hedin2.R1g353200
13865104|F|0-24:A>G-24:A>G	LG1	383.294	Vfaba.Hedin2.R1g352400
3523745|F|0-14:G>A-14:G>A	LG1	383.626	Vfaba.Hedin2.R1g351240
3530979|F|0-7:T>A-7:T>A	LG1	384.624
13867617|F|0-20:G>T-20:G>T	LG1	384.624
3522435|F|0-30:C>T-30:C>T	LG1	384.956	Vfaba.Hedin2.R1.Ung074120
3531808|F|0-39:A>G-39:A>G	LG1	385.287	Vfaba.Hedin2.R1g354040
39972876|F|0-55:C>T-55:C>T	LG1	385.287
3520639|F|0-18:T>C-18:T>C	LG1	387.975	Vfaba.Hedin2.R1g366640
13910527|F|0-20:A>C-20:A>C	LG1	387.975	Vfaba.Hedin2.R1g356960
3531130|F|0-37:T>C-37:T>C	LG1	388.306
3523033|F|0-30:C>A-30:C>A	LG1	388.306
3529701|F|0-29:G>A-29:G>A	LG1	389.305
3529291|F|0-28:A>G-28:A>G	LG1	389.305
13866328|F|0-10:G>A-10:G>A	LG1	392.337
3520437|F|0-55:C>T-55:C>T	LG1	392.669
18318963|F|0-46:C>T-46:C>T	LG1	393.334
18321202|F|0-39:G>A-39:G>A	LG1	395.005
3520612|F|0-46:T>C-46:T>C	LG1	396.004
3523701|F|0-47:G>A-47:G>A	LG1	396.004	Vfaba.Hedin2.R1g364960
13868666|F|0-5:T>C-5:T>C	LG1	396.336
13911231|F|0-35:C>T-35:C>T	LG1	397.001	Vfaba.Hedin2.R1g366240
39972780|F|0-28:A>G-28:A>G	LG1	397.001	Vfaba.Hedin2.R1g365800
32610940|F|0-39:G>T-39:G>T	LG1	397.001
3509806|F|0-65:C>T-65:C>T	LG1	397.001
39974546|F|0-23:G>A-23:G>A	LG1	397.001	Vfaba.Hedin2.R1g365480.2
3520591|F|0-59:A>G-59:A>G	LG1	397.999
13911250|F|0-30:G>A-30:G>A	LG1	397.999
39983029|F|0-68:C>G-68:C>G	LG1	398.998	Vfaba.Hedin2.R1g368640
13864928|F|0-46:C>G-46:C>G	LG1	399.663	Vfaba.Hedin2.R1g368640
32610311|F|0-60:A>G-60:A>G	LG1	399.663	Vfaba.Hedin2.R1g368720
3519944|F|0-36:G>A-36:G>A	LG1	399.663
39977937|F|0-17:G>A-17:G>A	LG1	399.663
3524235|F|0-46:C>T-46:C>T	LG1	400.327	Vfaba.Hedin2.R1g369200
13868747|F|0-50:G>A-50:G>A	LG1	400.327
13909076|F|0-15:T>C-15:T>C	LG1	400.992
3530762|F|0-34:G>A-34:G>A	LG1	402.326
3520456|F|0-20:G>C-20:G>C	LG1	402.326
13904856|F|0-37:T>C-37:T>C	LG1	402.657	Vfaba.Hedin2.R1g369880
13912680|F|0-22:C>A-22:C>A	LG1	402.657
39972062|F|0-11:G>A-11:G>A	LG1	404.328
3522525|F|0-66:T>G-66:T>G	LG1	404.992
39982795|F|0-11:C>T-11:C>T	LG1	404.992	Vfaba.Hedin2.R1g371720
3519109|F|0-16:T>G-16:T>G	LG1	404.992
3520498|F|0-44:A>G-44:A>G	LG1	405.657
13912225|F|0-16:A>G-16:A>G	LG1	405.989
13911999|F|0-17:T>C-17:T>C	LG1	405.989
3527258|F|0-21:A>T-21:A>T	LG1	408.336
22857728|F|0-43:A>G-43:A>G	LG1	408.336
13868051|F|0-48:A>T-48:A>T	LG1	409
3521219|F|0-66:C>G-66:C>G	LG1	409.332	Vfaba.Hedin2.R1.Ung020560
3519981|F|0-6:T>C-6:T>C	LG1	409.332	Vfaba.Hedin2.R1.Ung020560
32612619|F|0-37:G>C-37:G>C	LG1	409.332	Vfaba.Hedin2.R1g377000
39977819|F|0-34:A>G-34:A>G	LG1	411.002	Vfaba.Hedin2.R1.3g060400
3525789|F|0-19:T>A-19:T>A	LG1	411.002
3522517|F|0-18:G>A-18:G>A	LG1	412.337
3524291|F|0-48:C>A-48:C>A	LG1	413.001	Vfaba.Hedin2.R1g230400
3520688|F|0-10:C>T-10:C>T	LG1	413.666	Vfaba.Hedin2.R1g379240
13909640|F|0-5:C>A-5:C>A	LG1	413.666
3521700|F|0-28:G>A-28:G>A	LG1	414.664
39974479|F|0-57:T>C-57:T>C	LG1	414.664	Vfaba.Hedin2.R1g379480
3508125|F|0-63:G>A-63:G>A	LG1	415.663
39977636|F|0-34:C>G-34:C>G	LG1	415.663
3519436|F|0-24:A>C-24:A>C	LG1	415.663	Vfaba.Hedin2.R1g378520
18319393|F|0-7:T>G-7:T>G	LG1	417.671	Vfaba.Hedin2.R1g380160
3519263|F|0-37:G>A-37:G>A	LG1	418.336
3518903|F|0-63:T>C-63:T>C	LG1	418.668
3520331|F|0-49:A>C-49:A>C	LG1	420.002
39973860|F|0-20:A>G-20:A>G	LG1	421.001	Vfaba.Hedin2.R1g385760
3520719|F|0-12:C>T-12:C>T	LG1	421.666
3511724|F|0-16:C>T-16:C>T	LG1	421.666
3527966|F|0-49:C>T-49:C>T	LG1	421.666	Vfaba.Hedin2.R1g386800
39973710|F|0-37:C>T-37:C>T	LG1	421.997	Vfaba.Hedin2.R1g384680
3512520|F|0-27:C>T-27:C>T	LG1	421.997
13912777|F|0-37:A>C-37:A>C	LG1	422.662	Vfaba.Hedin2.R1g241320
3525672|F|0-6:G>A-6:G>A	LG1	422.994
3519834|F|0-30:T>C-30:T>C	LG1	422.994	Vfaba.Hedin2.R1g387440
13868908|F|0-6:A>T-6:A>T	LG1	423.658
13908604|F|0-18:A>G-18:A>G	LG1	423.658
18320418|F|0-35:A>T-35:A>T	LG1	423.658
3509277|F|0-24:C>T-24:C>T	LG1	423.658	Vfaba.Hedin2.R1g389160
3519707|F|0-11:G>C-11:G>C	LG1	424.323
3528339|F|0-21:C>T-21:C>T	LG1	424.323
13867217|F|0-7:C>T-7:C>T	LG1	425.994
32610797|F|0-18:G>A-18:G>A	LG1	425.994
32611966|F|0-53:T>G-53:T>G	LG1	425.994
3518634|F|0-56:G>A-56:G>A	LG1	425.994	Vfaba.Hedin2.R1g099040
13866463|F|0-48:G>A-48:G>A	LG1	425.994
3528827|F|0-43:A>G-43:A>G	LG1	425.994
13867713|F|0-20:G>A-20:G>A	LG1	425.994
3524172|F|0-34:A>T-34:A>T	LG1	425.994
3527420|F|0-62:G>T-62:G>T	LG1	426.659	Vfaba.Hedin2.R1g391040
3524483|F|0-9:C>G-9:C>G	LG1	426.659
3524592|F|0-35:A>G-35:A>G	LG1	426.659
3507680|F|0-36:A>G-36:A>G	LG1	427.324
3508122|F|0-54:A>G-54:A>G	LG1	427.655
3509507|F|0-47:T>G-47:T>G	LG1	427.987
3516333|F|0-27:A>G-27:A>G	LG1	427.987	Vfaba.Hedin2.R1.Ung083160
18321620|F|0-14:G>C-14:G>C	LG1	427.987
3516047|F|0-20:C>A-20:C>A	LG1	427.987
13868164|F|0-27:G>C-27:G>C	LG1	429.322
13913235|F|0-12:T>C-12:T>C	LG1	429.322
13867368|F|0-49:A>G-49:A>G	LG1	429.322	Vfaba.Hedin2.R1g394520
39974836|F|0-59:G>A-59:G>A	LG1	429.322	Vfaba.Hedin2.R1g394600
13865676|F|0-63:G>A-63:G>A	LG1	429.322	Vfaba.Hedin2.R1g394560
32609357|F|0-46:G>A-46:G>A	LG1	429.322	Vfaba.Hedin2.R1g394520
13869174|F|0-12:C>A-12:C>A	LG1	429.654
18320325|F|0-21:T>G-21:T>G	LG1	429.654
3518386|F|0-17:C>G-17:C>G	LG1	429.654
3530308|F|0-6:T>C-6:T>C	LG1	429.985
13904886|F|0-47:G>T-47:G>T	LG1	429.985
18320341|F|0-20:A>T-20:A>T	LG1	429.985
3519698|F|0-31:C>G-31:C>G	LG1	429.985
3523715|F|0-16:A>G-16:A>G	LG1	430.984	Vfaba.Hedin2.R1g395920
3526430|F|0-52:G>A-52:G>A	LG1	431.983
3526430|F|0-49:A>T-49:A>T	LG1	431.983
13868189|F|0-13:C>G-13:C>G	LG1	432.982	Vfaba.Hedin2.R1.2g067000
39981119|F|0-44:T>C-44:T>C	LG1	432.982	Vfaba.Hedin2.R1g397480
3519564|F|0-7:C>T-7:C>T	LG1	432.982
39972212|F|0-18:A>T-18:A>T	LG1	432.982
13910896|F|0-66:G>A-66:G>A	LG1	432.982	Vfaba.Hedin2.R1g397840
3518230|F|0-27:G>A-27:G>A	LG1	432.982
3513627|F|0-17:G>C-17:G>C	LG1	432.982
3520736|F|0-44:G>T-44:G>T	LG1	434.316
13869012|F|0-8:T>C-8:T>C	LG1	434.316
32611074|F|0-22:C>A-22:C>A	LG1	434.316
13911924|F|0-10:G>A-10:G>A	LG1	435.315
3514388|F|0-38:A>C-38:A>C	LG1	435.315
32610810|F|0-5:A>C-5:A>C	LG1	435.98
3509825|F|0-18:G>A-18:G>A	LG1	436.644
39974847|F|0-15:A>C-15:A>C	LG1	436.644	Vfaba.Hedin2.R1g401520
13912689|F|0-25:A>G-25:A>G	LG1	437.643	Vfaba.Hedin2.R1g056280
13865583|F|0-25:T>C-25:T>C	LG1	438.978	Vfaba.Hedin2.R1g403360
13865877|F|0-32:C>T-32:C>T	LG1	438.978
3519661|F|0-56:T>C-56:T>C	LG1	440.312	Vfaba.Hedin2.R1g404520
3521800|F|0-26:A>G-26:A>G	LG1	440.312
22856759|F|0-32:T>C-32:T>C	LG1	440.312	Vfaba.Hedin2.R1.2g199440
32611271|F|0-21:T>C-21:T>C	LG1	440.312	Vfaba.Hedin2.R1g405960
3511935|F|0-67:C>T-67:C>T	LG1	440.312
3507198|F|0-64:G>T-64:G>T	LG1	441.311
3527519|F|0-66:C>T-66:C>T	LG1	441.311
39973360|F|0-5:C>T-5:C>T	LG1	441.976
13865668|F|0-13:C>T-13:C>T	LG1	441.976	Vfaba.Hedin2.R1g092160
3518798|F|0-30:G>A-30:G>A	LG1	441.976	Vfaba.Hedin2.R1g407720
13908746|F|0-13:T>A-13:T>A	LG1	441.976	Vfaba.Hedin2.R1g407840
3532575|F|0-52:A>C-52:A>C	LG1	441.976
32611235|F|0-26:C>G-26:C>G	LG1	441.976	Vfaba.Hedin2.R1g409120
3509568|F|0-37:T>C-37:T>C	LG1	442.307
3523818|F|0-51:C>T-51:C>T	LG1	442.972	Vfaba.Hedin2.R1.5g088240
3526486|F|0-36:A>T-36:A>T	LG1	443.304	Vfaba.Hedin2.R1g410280
3511184|F|0-13:C>T-13:C>T	LG1	443.636
3528867|F|0-57:G>T-57:G>T	LG1	443.967
3522296|F|0-56:G>C-56:G>C	LG1	443.967	Vfaba.Hedin2.R1g411440
3527518|F|0-10:A>G-10:A>G	LG1	443.967
3520785|F|0-31:C>G-31:C>G	LG1	444.966	Vfaba.Hedin2.R1g411680
3518546|F|0-60:G>A-60:G>A	LG1	444.966
22857764|F|0-14:A>G-14:A>G	LG1	446.301
32611224|F|0-25:A>G-25:A>G	LG1	446.301
3530311|F|0-40:G>A-40:G>A	LG1	447.635
3521145|F|0-45:A>T-45:A>T	LG1	447.635
3520899|F|0-15:T>G-15:T>G	LG1	449.306	Vfaba.Hedin2.R1g413400
3530593|F|0-8:T>C-8:T>C	LG1	450.304
3510205|F|0-54:C>T-54:C>T	LG1	451.303
39973369|F|0-43:A>G-43:A>G	LG1	451.634
13909674|F|0-18:T>G-18:T>G	LG1	451.634	Vfaba.Hedin2.R1g414120
3513656|F|0-55:T>G-55:T>G	LG1	451.634	Vfaba.Hedin2.R1g414160
13904836|F|0-21:C>T-21:C>T	LG1	451.634
32609518|F|0-18:T>C-18:T>C	LG1	453.305	Vfaba.Hedin2.R1g415640
39980313|F|0-63:G>A-63:G>A	LG1	453.305
13904318|F|0-63:G>A-63:G>A	LG1	453.305	Vfaba.Hedin2.R1g417720
3519784|F|0-38:G>C-38:G>C	LG1	453.305
39972500|F|0-20:C>G-20:C>G	LG1	455.314
3521621|F|0-54:T>A-54:T>A	LG1	456.313	Vfaba.Hedin2.R1.4g238800
39982237|F|0-15:A>T-15:A>T	LG1	456.313
3511894|F|0-5:C>T-5:C>T	LG1	456.313	Vfaba.Hedin2.R1g416360
3524549|F|0-11:A>C-11:A>C	LG1	459.002
3507423|F|0-28:T>C-28:T>C	LG1	460.001
39972431|F|0-14:C>G-14:C>G	LG1	461
3511873|F|0-46:T>C-46:T>C	LG1	461.332
3522511|F|0-48:C>T-48:C>T	LG1	463.681	Vfaba.Hedin2.R1g423640
3527529|F|0-35:T>A-35:T>A	LG1	463.681
3515014|F|0-63:C>T-63:C>T	LG1	465.015	Vfaba.Hedin2.R1g425520
13909130|F|0-63:A>G-63:A>G	LG1	465.015
13864834|F|0-48:T>C-48:T>C	LG1	465.68
13867536|F|0-35:C>T-35:C>T	LG1	466.678	Vfaba.Hedin2.R1g427120
3522470|F|0-16:G>A-16:G>A	LG1	466.678	Vfaba.Hedin2.R1g427880
13906164|F|0-10:C>T-10:C>T	LG1	468.688
13906078|F|0-45:A>G-45:A>G	LG1	470.023	Vfaba.Hedin2.R1g432160
13911583|F|0-58:G>T-58:G>T	LG1	470.687
32612841|F|0-57:A>T-57:A>T	LG1	473.378
3515512|F|0-16:A>C-16:A>C	LG1	473.71
3522760|F|0-27:G>A-27:G>A	LG1	475.044	Vfaba.Hedin2.R1g434480
3522402|F|0-56:C>A-56:C>A	LG1	475.376
13867491|F|0-30:T>C-30:T>C	LG1	475.708	Vfaba.Hedin2.R1g434560
13867530|F|0-45:G>A-45:G>A	LG1	478.743
3521766|F|0-40:T>A-40:T>A	LG1	479.075
39982437|F|0-61:C>T-61:C>T	LG1	479.075
3517180|F|0-18:T>C-18:T>C	LG1	479.075	Vfaba.Hedin2.R1g436960
3525886|F|0-61:T>C-61:T>C	LG1	479.075	Vfaba.Hedin2.R1g439360
13863405|F|0-52:T>C-52:T>C	LG1	479.075
13908853|F|0-16:A>G-16:A>G	LG1	479.075
3514332|F|0-9:T>C-9:T>C	LG1	479.075
3517105|F|0-18:G>A-18:G>A	LG1	479.407	Vfaba.Hedin2.R1g440200
3506763|F|0-24:T>C-24:T>C	LG1	479.407
3524323|F|0-17:T>G-17:T>G	LG1	479.407
3514387|F|0-56:G>A-56:G>A	LG1	479.739	Vfaba.Hedin2.R1g439360
13866403|F|0-6:T>G-6:T>G	LG1	479.739	Vfaba.Hedin2.R1g438200
32609439|F|0-18:G>A-18:G>A	LG1	479.739	Vfaba.Hedin2.R1g438640
13865352|F|0-17:A>G-17:A>G	LG1	480.071
3523941|F|0-17:A>T-17:A>T	LG1	482.081
39982366|F|0-17:A>G-17:A>G	LG1	482.081
13905847|F|0-30:G>A-30:G>A	LG1	482.081	Vfaba.Hedin2.R1.Ung046400
13905000|F|0-18:G>A-18:G>A	LG1	482.081	Vfaba.Hedin2.R1g442400
3531397|F|0-31:A>C-31:A>C	LG1	482.081
13909749|F|0-27:C>T-27:C>T	LG1	482.081
32609641|F|0-45:T>G-45:T>G	LG1	483.416	Vfaba.Hedin2.R1g442840
3520193|F|0-68:G>A-68:G>A	LG1	483.748	Vfaba.Hedin2.R1g443240
39980332|F|0-12:A>G-12:A>G	LG1	484.413
18318947|F|0-14:C>T-14:C>T	LG1	484.413
3511061|F|0-8:C>T-8:C>T	LG1	486.763	Vfaba.Hedin2.R1.5g066760
39972783|F|0-18:G>A-18:G>A	LG1	487.095	Vfaba.Hedin2.R1.Ung108000
3517109|F|0-20:C>T-20:C>T	LG1	487.426	Vfaba.Hedin2.R1.Ung047520
32608369|F|0-48:C>G-48:C>G	LG1	488.761
3524620|F|0-46:A>G-46:A>G	LG1	490.772
3507729|F|0-33:T>C-33:T>C	LG1	490.772	Vfaba.Hedin2.R1g450520
3511199|F|0-53:T>C-53:T>C	LG1	491.437	Vfaba.Hedin2.R1g394320
13905207|F|0-29:T>C-29:T>C	LG1	491.437
13868951|F|0-29:G>A-29:G>A	LG1	491.437	Vfaba.Hedin2.R1g424320
13912017|F|0-8:G>C-8:G>C	LG1	491.437
18318751|F|0-42:G>T-42:G>T	LG1	491.768	Vfaba.Hedin2.R1g450360
13912954|F|0-29:C>T-29:C>T	LG1	491.768
13911943|F|0-19:G>A-19:G>A	LG1	491.768
13868102|F|0-33:G>T-33:G>T	LG1	491.768	Vfaba.Hedin2.R1g172080
3516189|F|0-10:A>C-10:A>C	LG1	491.768
3509816|F|0-44:T>C-44:T>C	LG1	491.768
3520424|F|0-24:G>C-24:G>C	LG1	491.768
3516597|F|0-17:C>T-17:C>T	LG1	491.768
3522404|F|0-40:C>G-40:C>G	LG1	493.779	Vfaba.Hedin2.R1g452040
3506832|F|0-11:C>G-11:C>G	LG1	494.111
3525491|F|0-11:C>A-11:C>A	LG1	495.446
3513409|F|0-68:T>G-68:T>G	LG1	495.446
18321809|F|0-28:T>G-28:T>G	LG1	496.111
13911928|F|0-30:T>G-30:T>G	LG1	496.111	Vfaba.Hedin2.R1g453640
3521118|F|0-45:A>G-45:A>G	LG1	496.776	Vfaba.Hedin2.R1g455360
3519042|F|0-47:A>T-47:A>T	LG1	496.776
32610246|F|0-60:T>C-60:T>C	LG1	498.448	Vfaba.Hedin2.R1g456440
3518805|F|0-68:A>G-68:A>G	LG1	498.448	Vfaba.Hedin2.R1g457680
18318918|F|0-6:T>C-6:T>C	LG1	498.448
3522874|F|0-29:T>C-29:T>C	LG1	498.448
39977218|F|0-17:A>T-17:A>T	LG1	499.113	Vfaba.Hedin2.R1g458320
3521796|F|0-11:T>A-11:T>A	LG1	499.113
3513251|F|0-9:T>A-9:T>A	LG1	499.445
3520378|F|0-29:T>C-29:T>C	LG1	499.445	Vfaba.Hedin2.R1.Ung017120
3518792|F|0-22:A>G-22:A>G	LG1	499.445
3521243|F|0-23:T>C-23:T>C	LG1	499.777
3521554|F|0-33:G>A-33:G>A	LG1	500.109	Vfaba.Hedin2.R1g458680
3519550|F|0-45:C>T-45:C>T	LG1	501.108
3515583|F|0-28:C>A-28:C>A	LG1	501.108
39981658|F|0-8:T>C-8:T>C	LG1	504.143
39977136|F|0-50:C>T-50:C>T	LG1	507.177	Vfaba.Hedin2.R1g463440
3518856|F|0-46:T>C-46:T>C	LG1	508.176	Vfaba.Hedin2.R1g461080
3514494|F|0-56:T>C-56:T>C	LG1	508.176
3529781|F|0-67:C>T-67:C>T	LG1	509.849	Vfaba.Hedin2.R1g462360
13868082|F|0-29:G>A-29:G>A	LG1	510.181	Vfaba.Hedin2.R1g463160
3517939|F|0-22:G>A-22:G>A	LG1	511.18
13908832|F|0-65:A>G-65:A>G	LG1	511.512	Vfaba.Hedin2.R1.6g136240
3530272|F|0-33:A>C-33:A>C	LG1	511.512
13867034|F|0-37:T>C-37:T>C	LG1	512.846
18320265|F|0-9:C>T-9:C>T	LG1	512.846	Vfaba.Hedin2.R1g468040
3523074|F|0-37:A>G-37:A>G	LG1	512.846
3509669|F|0-15:T>G-15:T>G	LG1	514.518
3523592|F|0-49:T>C-49:T>C	LG1	514.518	Vfaba.Hedin2.R1g471040
13912239|F|0-8:A>G-8:A>G	LG1	514.518
3519313|F|0-30:C>T-30:C>T	LG1	514.518
3519379|F|0-29:C>T-29:C>T	LG1	516.19
18321415|F|0-47:A>G-47:A>G	LG1	516.855
3525856|F|0-32:C>T-32:C>T	LG1	517.52
3518811|F|0-6:C>T-6:C>T	LG1	519.53	Vfaba.Hedin2.R1g473320
3521807|F|0-47:G>A-47:G>A	LG1	521.202
3523018|F|0-36:T>C-36:T>C	LG1	524.237
3522558|F|0-46:G>C-46:G>C	LG1	526.588	Vfaba.Hedin2.R1g477920
3513553|F|0-46:C>T-46:C>T	LG1	526.919
3528622|F|0-39:C>A-39:C>A	LG1	526.919
39978985|F|0-67:C>G-67:C>G	LG1	526.919	Vfaba.Hedin2.R1g477920
3510548|F|0-39:A>G-39:A>G	LG1	526.919
3517073|F|0-35:T>G-35:T>G	LG1	529.27
13911198|F|0-15:G>A-15:G>A	LG1	529.602
39979790|F|0-36:T>C-36:T>C	LG1	529.934	Vfaba.Hedin2.R1g482560
3524205|F|0-62:C>G-62:C>G	LG1	529.934
3522566|F|0-59:G>T-59:G>T	LG1	530.266	Vfaba.Hedin2.R1g482880
39983193|F|0-26:G>A-26:G>A	LG1	531.6	Vfaba.Hedin2.R1g484640
3514690|F|0-42:G>A-42:G>A	LG1	531.6	Vfaba.Hedin2.R1g484160
3530388|F|0-59:G>C-59:G>C	LG1	532.265	Vfaba.Hedin2.R1g484640
3530388|F|0-28:T>A-28:T>A	LG1	532.265	Vfaba.Hedin2.R1g484640
3514273|F|0-38:T>G-38:T>G	LG1	532.597
13867369|F|0-20:G>A-20:G>A	LG1	532.928	Vfaba.Hedin2.R1g484640
3511599|F|0-30:G>C-30:G>C	LG1	533.26
3530619|F|0-23:A>T-23:A>T	LG1	533.592
3530619|F|0-6:G>A-6:G>A	LG1	533.592
13867644|F|0-60:G>A-60:G>A	LG1	534.257	Vfaba.Hedin2.R1g483200
3518300|F|0-63:A>G-63:A>G	LG1	534.257
3511209|F|0-57:T>C-57:T>C	LG1	534.257	Vfaba.Hedin2.R1.6g118440
3510099|F|0-13:A>T-13:A>T	LG1	534.921
3518970|F|0-36:G>A-36:G>A	LG1	535.586	Vfaba.Hedin2.R1g488400
39979285|F|0-46:G>C-46:G>C	LG1	535.586
13911741|F|0-47:G>T-47:G>T	LG1	535.918
32612635|F|0-9:T>G-9:T>G	LG1	535.918	Vfaba.Hedin2.R1g488680
3526225|F|0-30:G>A-30:G>A	LG1	535.918	Vfaba.Hedin2.R1g487280
3521138|F|0-31:T>C-31:T>C	LG1	536.582	Vfaba.Hedin2.R1g488840
3526913|F|0-26:T>C-26:T>C	LG1	537.581
3520105|F|0-48:A>G-48:A>G	LG1	537.581
3514616|F|0-63:C>T-63:C>T	LG1	537.913
3519652|F|0-9:G>A-9:G>A	LG1	538.245	Vfaba.Hedin2.R1g495520
3521012|F|0-61:C>T-61:C>T	LG1	538.245	Vfaba.Hedin2.R1g490840
3521814|F|0-21:A>G-21:A>G	LG1	538.576
3510189|F|0-18:T>C-18:T>C	LG1	538.576	Vfaba.Hedin2.R1g490360.3
3506849|F|0-17:T>C-17:T>C	LG1	538.908
13913220|F|0-24:C>A-24:C>A	LG1	538.908
3523682|F|0-49:A>T-49:A>T	LG1	538.908
3522357|F|0-32:A>G-32:A>G	LG1	539.24
3518529|F|0-49:G>A-49:G>A	LG1	539.24
3529704|F|0-23:A>C-23:A>C	LG1	539.24	Vfaba.Hedin2.R1g493640
3512569|F|0-30:A>T-30:A>T	LG1	540.239
39977871|F|0-46:G>A-46:G>A	LG1	540.239
13866320|F|0-58:A>G-58:A>G	LG1	540.903
3516511|F|0-10:G>C-10:G>C	LG1	540.903
13904559|F|0-21:G>C-21:G>C	LG1	540.903	Vfaba.Hedin2.R1g495120
3508204|F|0-30:T>A-30:T>A	LG2	0	Vfaba.Hedin2.R1.2g007880
39974187|F|0-27:C>T-27:C>T	LG2	0
13867714|F|0-11:A>G-11:A>G	LG2	0
3530287|F|0-55:C>G-55:C>G	LG2	0	Vfaba.Hedin2.R1.2g009560
3516900|F|0-20:A>G-20:A>G	LG2	0
3522578|F|0-39:A>G-39:A>G	LG2	0	Vfaba.Hedin2.R1.2g009440
3512055|F|0-54:G>A-54:G>A	LG2	0	Vfaba.Hedin2.R1.2g012560
3518787|F|0-27:A>G-27:A>G	LG2	0.331688
3523037|F|0-14:A>G-14:A>G	LG2	2.00186
3508903|F|0-24:T>A-24:T>A	LG2	2.33355
3530409|F|0-67:C>A-67:C>A	LG2	2.66523
39972422|F|0-25:G>A-25:G>A	LG2	2.99692
13908688|F|0-51:C>T-51:C>T	LG2	2.99692	Vfaba.Hedin2.R1.2g000960.3
3521885|F|0-57:T>C-57:T>C	LG2	3.66148
13867381|F|0-39:T>C-39:T>C	LG2	3.66148
3518303|F|0-50:T>C-50:T>C	LG2	3.66148	Vfaba.Hedin2.R1.2g003040
3521676|F|0-66:G>A-66:G>A	LG2	4.99527	Vfaba.Hedin2.R1.2g009440
22857474|F|0-22:C>T-22:C>T	LG2	4.99527
3507259|F|0-23:C>T-23:C>T	LG2	4.99527
3518672|F|0-16:G>C-16:G>C	LG2	4.99527	Vfaba.Hedin2.R1.2g008600
3519102|F|0-46:T>C-46:T>C	LG2	4.99527	Vfaba.Hedin2.R1g136920
13863894|F|0-16:T>C-16:T>C	LG2	4.99527
3523355|F|0-57:T>C-57:T>C	LG2	5.65977
3523978|F|0-44:A>G-44:A>G	LG2	5.65977	Vfaba.Hedin2.R1.2g011360
32611078|F|0-62:T>G-62:T>G	LG2	6.65825
39972014|F|0-60:C>T-60:C>T	LG2	8.66693
3510321|F|0-19:T>G-19:T>G	LG2	8.66693
32611607|F|0-62:G>A-62:G>A	LG2	8.66693	Vfaba.Hedin2.R1.2g014000
13911969|F|0-7:C>G-7:C>G	LG2	8.66693	Vfaba.Hedin2.R1.2g014960
3514329|F|0-30:T>C-30:T>C	LG2	8.66693
3507856|F|0-59:T>A-59:T>A	LG2	9.33158
3523425|F|0-16:A>G-16:A>G	LG2	10.6658	Vfaba.Hedin2.R1.4g173080
3509858|F|0-28:G>A-28:G>A	LG2	11.3305
3530168|F|0-56:C>T-56:C>T	LG2	11.6622
39973749|F|0-5:G>A-5:G>A	LG2	11.9939
13909148|F|0-38:T>A-38:T>A	LG2	11.9939
3522050|F|0-37:T>C-37:T>C	LG2	11.9939
3522135|F|0-29:G>A-29:G>A	LG2	11.9939
39980684|F|0-47:G>T-47:G>T	LG2	14.0029
22857569|F|0-16:C>A-16:C>A	LG2	14.6675	Vfaba.Hedin2.R1.2g020560
39983074|F|0-60:G>C-60:G>C	LG2	16.0013
22856659|F|0-26:C>T-26:C>T	LG2	16.0013
13904877|F|0-13:A>T-13:A>T	LG2	16.6658
3507895|F|0-12:C>T-12:C>T	LG2	16.6658
3521321|F|0-25:C>T-25:C>T	LG2	16.6658
3531965|F|0-32:C>G-32:C>G	LG2	16.6658
22856655|F|0-68:C>T-68:C>T	LG2	16.6658
18320320|F|0-34:C>A-34:C>A	LG2	19.0125
3511765|F|0-51:A>T-51:A>T	LG2	19.0125
13909736|F|0-35:G>A-35:G>A	LG2	19.0125
3520902|F|0-17:G>A-17:G>A	LG2	20.6824
3520292|F|0-51:A>G-51:A>G	LG2	23.7113
3510981|F|0-38:C>G-38:C>G	LG2	24.043
13911643|F|0-56:A>T-56:A>T	LG2	24.3746	Vfaba.Hedin2.R1g463960
13865597|F|0-67:A>G-67:A>G	LG2	24.3746	Vfaba.Hedin2.R1.2g025960
13869338|F|0-14:C>G-14:C>G	LG2	25.7078
3523947|F|0-33:A>G-33:A>G	LG2	25.7078	Vfaba.Hedin2.R1.2g026240
39983013|F|0-13:C>T-13:C>T	LG2	25.7078
32612478|F|0-26:A>C-26:A>C	LG2	26.7059
3523832|F|0-54:A>T-54:A>T	LG2	27.7039
3524540|F|0-18:T>G-18:T>G	LG2	27.7039
13909355|F|0-56:A>G-56:A>G	LG2	27.7039
3512420|F|0-39:C>T-39:C>T	LG2	27.7039	Vfaba.Hedin2.R1.2g028320
3526379|F|0-8:G>A-8:G>A	LG2	27.7039
13912451|F|0-12:G>A-12:G>A	LG2	28.0356	Vfaba.Hedin2.R1.2g027760
3520022|F|0-66:T>C-66:T>C	LG2	28.0356	Vfaba.Hedin2.R1.2g033240
3524031|F|0-42:A>G-42:A>G	LG2	28.0356	Vfaba.Hedin2.R1.2g030120
13912292|F|0-33:A>T-33:A>T	LG2	28.0356
3524968|F|0-43:G>A-43:G>A	LG2	28.0356
3518901|F|0-58:T>C-58:T>C	LG2	28.3672
3513702|F|0-30:C>T-30:C>T	LG2	29.3653
13911690|F|0-62:G>A-62:G>A	LG2	29.3653
3525696|F|0-52:G>T-52:G>T	LG2	29.697
3521433|F|0-68:C>T-68:C>T	LG2	29.697	Vfaba.Hedin2.R1g268000
32610498|F|0-57:T>C-57:T>C	LG2	31.3662	Vfaba.Hedin2.R1.2g037560
39973391|F|0-11:T>G-11:T>G	LG2	32.6991
3531832|F|0-27:C>T-27:C>T	LG2	34.032	Vfaba.Hedin2.R1.2g038560
3507289|F|0-20:T>C-20:T>C	LG2	35.0301
13867568|F|0-50:G>A-50:G>A	LG2	35.0301
13868028|F|0-39:C>A-39:C>A	LG2	35.6945	Vfaba.Hedin2.R1g066400
3528390|F|0-16:G>A-16:G>A	LG2	37.7006
39978620|F|0-30:C>T-30:C>T	LG2	37.7006
3507851|F|0-38:T>C-38:T>C	LG2	38.6987
39973820|F|0-25:G>A-25:G>A	LG2	39.363	Vfaba.Hedin2.R1.2g041560
3525104|F|0-58:C>T-58:C>T	LG2	39.363
3517643|F|0-57:G>A-57:G>A	LG2	39.363	Vfaba.Hedin2.R1.2g040560
3515039|F|0-22:C>T-22:C>T	LG2	42.0488	Vfaba.Hedin2.R1.2g043400
39972354|F|0-6:A>G-6:A>G	LG2	42.0488	Vfaba.Hedin2.R1.2g044000
3520014|F|0-23:T>C-23:T>C	LG2	42.7132
3508609|F|0-16:A>G-16:A>G	LG2	42.7132
3531981|F|0-14:G>T-14:G>T	LG2	43.7114
39981214|F|0-41:C>T-41:C>T	LG2	45.0442
39981208|F|0-25:A>G-25:A>G	LG2	45.0442
39981210|F|0-42:T>A-42:T>A	LG2	45.7084
39981192|F|0-46:C>T-46:C>T	LG2	45.7084
3514739|F|0-48:C>T-48:C>T	LG2	45.7084
3514739|F|0-18:G>T-18:G>T	LG2	45.7084
3513381|F|0-13:G>A-13:G>A	LG2	49.4182	Vfaba.Hedin2.R1.2g046440
3519005|F|0-22:T>G-22:T>G	LG2	49.4182	Vfaba.Hedin2.R1.2g047320
13866513|F|0-14:T>C-14:T>C	LG2	50.0824
3517525|F|0-49:T>C-49:T>C	LG2	50.0824
18320957|F|0-27:G>T-27:G>T	LG2	50.0824	Vfaba.Hedin2.R1.2g048160
3523603|F|0-22:G>C-22:G>C	LG2	50.0824	Vfaba.Hedin2.R1.2g049000
3518104|F|0-39:G>T-39:G>T	LG2	50.7467
3521484|F|0-33:G>A-33:G>A	LG2	51.0783	Vfaba.Hedin2.R1.2g049280
3522268|F|0-20:C>A-20:C>A	LG2	52.0762	Vfaba.Hedin2.R1.2g050400
3507129|F|0-6:C>T-6:C>T	LG2	52.0762	Vfaba.Hedin2.R1.2g050200
39973373|F|0-9:G>T-9:G>T	LG2	52.0762
3508113|F|0-35:C>A-35:C>A	LG2	52.4078	Vfaba.Hedin2.R1.2g051840
3518499|F|0-13:A>G-13:A>G	LG2	52.4078
22857273|F|0-11:A>G-11:A>G	LG2	52.4078
3510773|F|0-43:T>C-43:T>C	LG2	53.7402
3522849|F|0-58:G>T-58:G>T	LG2	55.0729
3524309|F|0-62:T>C-62:T>C	LG2	55.4045
39981018|F|0-46:G>A-46:G>A	LG2	56.7377
39981018|F|0-10:A>T-10:A>T	LG2	56.7377
3522484|F|0-10:A>G-10:A>G	LG2	57.0693	Vfaba.Hedin2.R1.2g057560
13912980|F|0-7:T>A-7:T>A	LG2	57.0693
18321880|F|0-59:A>G-59:A>G	LG2	58.0675
39978717|F|0-22:A>G-22:A>G	LG2	58.0675
3520057|F|0-6:A>C-6:A>C	LG2	58.0675
3521799|F|0-8:T>G-8:T>G	LG2	58.7318
3522310|F|0-38:A>G-38:A>G	LG2	58.7318	Vfaba.Hedin2.R1.2g057560
3528186|F|0-7:T>C-7:T>C	LG2	59.3962
39977183|F|0-51:A>G-51:A>G	LG2	59.3962
3518074|F|0-21:A>G-21:A>G	LG2	59.3962	Vfaba.Hedin2.R1.2g055480
3518948|F|0-26:C>G-26:C>G	LG2	59.7278
3511144|F|0-30:C>T-30:C>T	LG2	59.7278
3511144|F|0-62:T>C-62:T>C	LG2	59.7278
3518874|F|0-35:G>T-35:G>T	LG2	63.4397
3523688|F|0-33:G>A-33:G>A	LG2	63.4397	Vfaba.Hedin2.R1.2g059480
3507281|F|0-10:G>T-10:G>T	LG2	64.104	Vfaba.Hedin2.R1.2g060000
3524311|F|0-66:C>A-66:C>A	LG2	64.104
3524201|F|0-17:G>A-17:G>A	LG2	65.7738
13867413|F|0-46:G>A-46:G>A	LG2	66.1055	Vfaba.Hedin2.R1.4g036720
3521390|F|0-30:C>T-30:C>T	LG2	66.1055
13913107|F|0-14:T>C-14:T>C	LG2	66.1055
3521818|F|0-13:T>G-13:T>G	LG2	66.4372
3516943|F|0-7:T>C-7:T>C	LG2	66.4372	Vfaba.Hedin2.R1.2g063480
3524897|F|0-41:G>A-41:G>A	LG2	66.4372
3531844|F|0-49:T>A-49:T>A	LG2	68.1068	Vfaba.Hedin2.R1.2g065560
3524591|F|0-40:C>T-40:C>T	LG2	68.1068
39973614|F|0-54:G>A-54:G>A	LG2	68.1068
3519468|F|0-63:T>A-63:T>A	LG2	68.1068	Vfaba.Hedin2.R1g232960
13909132|F|0-49:C>T-49:C>T	LG2	68.1068
3518779|F|0-13:G>A-13:G>A	LG2	68.1068
32612377|F|0-10:G>T-10:G>T	LG2	68.4385
3521447|F|0-48:A>G-48:A>G	LG2	68.7701	Vfaba.Hedin2.R1.2g067960
3514119|F|0-18:A>T-18:A>T	LG2	68.7701
18318730|F|0-42:C>T-42:C>T	LG2	70.1032
13910689|F|0-15:C>A-15:C>A	LG2	71.1013
39972497|F|0-39:G>C-39:G>C	LG2	71.1013	Vfaba.Hedin2.R1.2g070280
3528710|F|0-38:T>C-38:T>C	LG2	74.8111
3520628|F|0-55:A>G-55:A>G	LG2	75.4754	Vfaba.Hedin2.R1.Ung049200
13864640|F|0-24:T>G-24:T>G	LG2	77.4815
3522187|F|0-43:A>G-43:A>G	LG2	77.4815	Vfaba.Hedin2.R1.2g072840
32613613|F|0-24:T>A-24:T>A	LG2	78.1458	Vfaba.Hedin2.R1.2g073680
3527708|F|0-6:C>A-6:C>A	LG2	78.1458
13908630|F|0-20:A>G-20:A>G	LG2	79.8148
3518656|F|0-25:C>T-25:C>T	LG2	81.1479
3523940|F|0-21:G>A-21:G>A	LG2	81.1479	Vfaba.Hedin2.R1.2g076920
3522385|F|0-53:C>G-53:C>G	LG2	81.8122	Vfaba.Hedin2.R1.2g078400
3517534|F|0-65:A>G-65:A>G	LG2	81.8122	Vfaba.Hedin2.R1.2g078240
3519625|F|0-11:C>G-11:C>G	LG2	81.8122	Vfaba.Hedin2.R1.2g078720
3531704|F|0-17:T>C-17:T>C	LG2	82.1438
3522122|F|0-18:T>C-18:T>C	LG2	82.4755
13868350|F|0-19:A>G-19:A>G	LG2	82.4755
3530557|F|0-28:A>G-28:A>G	LG2	83.1397
13866402|F|0-19:T>C-19:T>C	LG2	83.1397
3527133|F|0-43:C>T-43:C>T	LG2	83.4713
3523417|F|0-63:G>A-63:G>A	LG2	84.1355	Vfaba.Hedin2.R1.2g081120
13913141|F|0-43:A>G-43:A>G	LG2	84.4671	Vfaba.Hedin2.R1.Ung049920
3508574|F|0-61:C>T-61:C>T	LG2	84.7987
3529138|F|0-45:C>G-45:C>G	LG2	84.7987
13908772|F|0-17:A>G-17:A>G	LG2	85.7967	Vfaba.Hedin2.R1.2g084920
3523743|F|0-59:A>G-59:A>G	LG2	85.7967	Vfaba.Hedin2.R1.2g083120
13868852|F|0-22:C>T-22:C>T	LG2	85.7967
3512082|F|0-16:A>G-16:A>G	LG2	86.461
3512818|F|0-17:C>T-17:C>T	LG2	89.1447	Vfaba.Hedin2.R1.2g086440
22857957|F|0-31:G>A-31:G>A	LG2	89.1447
39974476|F|0-42:A>G-42:A>G	LG2	89.4763	Vfaba.Hedin2.R1.2g086640
3521247|F|0-15:G>A-15:G>A	LG2	90.4742
3519636|F|0-5:C>T-5:C>T	LG2	90.4742
39977564|F|0-41:A>G-41:A>G	LG2	90.4742
3520644|F|0-31:C>A-31:C>A	LG2	90.4742	Vfaba.Hedin2.R1.2g088920
13911514|F|0-34:T>G-34:T>G	LG2	90.4742
3511602|F|0-8:C>A-8:C>A	LG2	92.8189
13867396|F|0-43:G>A-43:G>A	LG2	94.8259
39982784|F|0-55:C>T-55:C>T	LG2	94.8259
39980146|F|0-43:G>C-43:G>C	LG2	94.8259	Vfaba.Hedin2.R1.2g091040
3531238|F|0-41:G>T-41:G>T	LG2	94.8259
3510815|F|0-8:T>C-8:T>C	LG2	94.8259
3512700|F|0-6:G>A-6:G>A	LG2	94.8259
13864888|F|0-25:A>G-25:A>G	LG2	94.8259
3520200|F|0-58:G>A-58:G>A	LG2	94.8259
3511602|F|0-33:A>G-33:A>G	LG2	94.8259
39977802|F|0-17:C>T-17:C>T	LG2	94.8259	Vfaba.Hedin2.R1.2g090920
3516185|F|0-13:C>T-13:C>T	LG2	95.8241	Vfaba.Hedin2.R1.2g094200
3520074|F|0-57:A>G-57:A>G	LG2	96.1557	Vfaba.Hedin2.R1.2g093120
3518718|F|0-36:T>G-36:T>G	LG2	96.8201
3518972|F|0-24:T>C-24:T>C	LG2	97.1517	Vfaba.Hedin2.R1.2g095800
3523816|F|0-39:T>A-39:T>A	LG2	97.4833
3532237|F|0-11:G>C-11:G>C	LG2	97.4833
3521855|F|0-49:C>T-49:C>T	LG2	97.4833	Vfaba.Hedin2.R1.2g094080
3515644|F|0-19:G>A-19:G>A	LG2	97.4833
13910675|F|0-50:G>T-50:G>T	LG2	97.4833	Vfaba.Hedin2.R1.Ung079360
3522105|F|0-20:G>T-20:G>T	LG2	97.815
3524215|F|0-37:T>C-37:T>C	LG2	97.815
3525745|F|0-12:G>A-12:G>A	LG2	97.815	Vfaba.Hedin2.R1.2g096040
13868872|F|0-31:A>G-31:A>G	LG2	97.815
13911092|F|0-22:G>C-22:G>C	LG2	97.815	Vfaba.Hedin2.R1.2g097000
3520911|F|0-42:T>A-42:T>A	LG2	98.4793
3523380|F|0-14:G>A-14:G>A	LG2	99.4774
13869383|F|0-67:A>T-67:A>T	LG2	100.142	Vfaba.Hedin2.R1.2g099360
3523435|F|0-24:T>C-24:T>C	LG2	100.142
3520704|F|0-26:C>T-26:C>T	LG2	100.142	Vfaba.Hedin2.R1.2g099280
13866756|F|0-44:C>G-44:C>G	LG2	100.142
3514180|F|0-22:A>C-22:A>C	LG2	100.142	Vfaba.Hedin2.R1.2g099080
3527311|F|0-37:A>C-37:A>C	LG2	101.14
13911517|F|0-14:C>T-14:C>T	LG2	101.471
3522565|F|0-67:G>A-67:G>A	LG2	101.471	Vfaba.Hedin2.R1.2g100880
3510361|F|0-34:T>A-34:T>A	LG2	101.471	Vfaba.Hedin2.R1.2g100800
39977061|F|0-64:C>T-64:C>T	LG2	102.136
39973830|F|0-63:C>T-63:C>T	LG2	103.804	Vfaba.Hedin2.R1.2g103680.2
13912316|F|0-37:G>T-37:G>T	LG2	103.804	Vfaba.Hedin2.R1.2g103120
3517843|F|0-18:A>T-18:A>T	LG2	103.804	Vfaba.Hedin2.R1.2g103200
3519958|F|0-51:C>T-51:C>T	LG2	104.136
3522898|F|0-44:C>T-44:C>T	LG2	104.136
39980308|F|0-34:G>C-34:G>C	LG2	105.134
3522318|F|0-21:T>C-21:T>C	LG2	106.467
3514730|F|0-17:G>A-17:G>A	LG2	106.467
3523580|F|0-38:G>C-38:G>C	LG2	106.798	Vfaba.Hedin2.R1.Ung117880
3526967|F|0-35:T>A-35:T>A	LG2	106.798
3523327|F|0-24:T>G-24:T>G	LG2	106.798
3520715|F|0-67:G>A-67:G>A	LG2	106.798	Vfaba.Hedin2.R1.2g106680
3520293|F|0-51:C>T-51:C>T	LG2	110.165
3521904|F|0-60:T>A-60:T>A	LG2	110.165	Vfaba.Hedin2.R1.2g109160
3520164|F|0-43:C>A-43:C>A	LG2	110.165
39978600|F|0-21:C>T-21:C>T	LG2	110.165	Vfaba.Hedin2.R1.2g109680
3520648|F|0-17:T>C-17:T>C	LG2	110.165
3522218|F|0-9:C>T-9:C>T	LG2	110.165	Vfaba.Hedin2.R1.2g109280
3521221|F|0-16:G>A-16:G>A	LG2	110.165
13863357|F|0-10:A>C-10:A>C	LG2	110.165
3518864|F|0-12:A>G-12:A>G	LG2	110.829
3520921|F|0-44:G>C-44:G>C	LG2	110.829
3525794|F|0-7:T>C-7:T>C	LG2	112.498	Vfaba.Hedin2.R1.2g112000
3507465|F|0-29:T>G-29:T>G	LG2	112.83
3519789|F|0-18:A>C-18:A>C	LG2	113.162	Vfaba.Hedin2.R1.2g112640
3523698|F|0-66:C>A-66:C>A	LG2	114.495	Vfaba.Hedin2.R1.2g113600
3522633|F|0-12:A>T-12:A>T	LG2	114.495	Vfaba.Hedin2.R1.2g113160
13868144|F|0-42:C>T-42:C>T	LG2	114.495
32612692|F|0-61:G>T-61:G>T	LG2	114.495
3511260|F|0-53:T>C-53:T>C	LG2	116.842	Vfaba.Hedin2.R1.2g115680
13867589|F|0-22:G>A-22:G>A	LG2	116.842
18321639|F|0-35:T>G-35:T>G	LG2	116.842
3511436|F|0-67:C>T-67:C>T	LG2	116.842
3519074|F|0-68:G>A-68:G>A	LG2	118.176	Vfaba.Hedin2.R1.2g116520
32612185|F|0-12:A>G-12:A>G	LG2	118.176
3509336|F|0-44:T>C-44:T>C	LG2	118.176
3514210|F|0-34:T>C-34:T>C	LG2	118.176
3525396|F|0-51:T>C-51:T>C	LG2	118.176	Vfaba.Hedin2.R1.2g117200
3523882|F|0-59:A>G-59:A>G	LG2	118.176	Vfaba.Hedin2.R1.2g118280
13864731|F|0-11:C>T-11:C>T	LG2	118.176
3515438|F|0-58:G>A-58:G>A	LG2	119.174	Vfaba.Hedin2.R1.2g118920
3522240|F|0-58:C>G-58:C>G	LG2	119.174	Vfaba.Hedin2.R1g096040
3510883|F|0-27:T>A-27:T>A	LG2	119.506
13910744|F|0-27:G>A-27:G>A	LG2	119.837
13905834|F|0-6:T>A-6:T>A	LG2	121.508	Vfaba.Hedin2.R1.2g120840
13909362|F|0-48:C>T-48:C>T	LG2	121.508
13905781|F|0-31:C>A-31:C>A	LG2	123.178
32611506|F|0-30:T>C-30:T>C	LG2	123.178	Vfaba.Hedin2.R1.2g122200
18318767|F|0-38:T>A-38:T>A	LG2	123.178	Vfaba.Hedin2.R1.2g123040
22856768|F|0-13:C>G-13:C>G	LG2	123.178	Vfaba.Hedin2.R1.2g122280
3513221|F|0-54:G>T-54:G>T	LG2	124.176	Vfaba.Hedin2.R1.2g130040
3508729|F|0-40:T>G-40:T>G	LG2	124.176
3527246|F|0-23:G>C-23:G>C	LG2	125.846
3530551|F|0-46:G>T-46:G>T	LG2	125.846
3513883|F|0-34:A>G-34:A>G	LG2	125.846
3515866|F|0-22:G>T-22:G>T	LG2	125.846
3520609|F|0-34:G>C-34:G>C	LG2	125.846
39971992|F|0-48:C>T-48:C>T	LG2	125.846
13869375|F|0-9:G>A-9:G>A	LG2	127.516	Vfaba.Hedin2.R1.2g124840
13913684|F|0-11:C>T-11:C>T	LG2	127.516
3511741|F|0-27:T>A-27:T>A	LG2	128.849
3514104|F|0-15:T>G-15:T>G	LG2	128.849
3521088|F|0-41:T>A-41:T>A	LG2	128.849	Vfaba.Hedin2.R1.2g124000
13910739|F|0-49:A>G-49:A>G	LG2	128.849	Vfaba.Hedin2.R1.2g131840
39977726|F|0-13:T>C-13:T>C	LG2	129.513
13911847|F|0-20:C>T-20:C>T	LG2	129.513
3521508|F|0-30:C>T-30:C>T	LG2	129.513	Vfaba.Hedin2.R1.2g132040
3518909|F|0-58:G>A-58:G>A	LG2	129.513	Vfaba.Hedin2.R1.2g132040
13912255|F|0-5:T>C-5:T>C	LG2	129.513	Vfaba.Hedin2.R1.2g134320
39982886|F|0-46:C>T-46:C>T	LG2	129.513
3521655|F|0-21:C>T-21:C>T	LG2	129.513	Vfaba.Hedin2.R1.3g175920
3519508|F|0-18:G>A-18:G>A	LG2	129.513	Vfaba.Hedin2.R1.2g133040
3524484|F|0-11:A>T-11:A>T	LG2	129.513
13868071|F|0-15:A>G-15:A>G	LG2	131.519
3523591|F|0-23:A>C-23:A>C	LG2	131.851	Vfaba.Hedin2.R1g322320
13864837|F|0-48:C>T-48:C>T	LG2	132.515
32610413|F|0-6:G>A-6:G>A	LG2	133.848
13868069|F|0-9:G>A-9:G>A	LG2	134.512
3523447|F|0-8:A>G-8:A>G	LG2	134.512	Vfaba.Hedin2.R1.2g139080
18320405|F|0-37:A>C-37:A>C	LG2	134.512
39972345|F|0-33:C>T-33:C>T	LG2	134.512	Vfaba.Hedin2.R1.2g138760
3519337|F|0-65:C>G-65:C>G	LG2	134.512	Vfaba.Hedin2.R1g200560.2
3523438|F|0-15:T>C-15:T>C	LG2	134.512	Vfaba.Hedin2.R1g200560.2
3528831|F|0-37:G>T-37:G>T	LG2	134.512
3514507|F|0-21:C>T-21:C>T	LG2	134.512	Vfaba.Hedin2.R1g200560.2
3530086|F|0-58:C>T-58:C>T	LG2	135.176	Vfaba.Hedin2.R1.4g189640
22856840|F|0-8:C>T-8:C>T	LG2	135.176	Vfaba.Hedin2.R1.2g139560
3529878|F|0-9:A>T-9:A>T	LG2	136.844
3512581|F|0-27:A>G-27:A>G	LG2	136.844
3509074|F|0-23:A>G-23:A>G	LG2	137.176
3519295|F|0-36:A>G-36:A>G	LG2	137.508	Vfaba.Hedin2.R1.2g145040
32610099|F|0-5:C>T-5:C>T	LG2	137.508
3519315|F|0-23:G>T-23:G>T	LG2	138.172
3524969|F|0-14:G>A-14:G>A	LG2	138.503
13865528|F|0-52:C>T-52:C>T	LG2	138.503
3522270|F|0-33:A>G-33:A>G	LG2	138.503	Vfaba.Hedin2.R1.2g143560
3511204|F|0-64:A>G-64:A>G	LG2	139.501
3524409|F|0-55:A>G-55:A>G	LG2	139.501
13864896|F|0-59:T>A-59:T>A	LG2	139.501
3516775|F|0-21:G>A-21:G>A	LG2	139.833
3512491|F|0-43:G>A-43:G>A	LG2	139.833	Vfaba.Hedin2.R1.2g140760
3511610|F|0-27:T>A-27:T>A	LG2	139.833
3511610|F|0-30:C>T-30:C>T	LG2	139.833
13909655|F|0-16:C>A-16:C>A	LG2	139.833
3519399|F|0-35:A>G-35:A>G	LG2	139.833
3521481|F|0-11:A>T-11:A>T	LG2	139.833
3513751|F|0-21:T>A-21:T>A	LG2	141.165
18320251|F|0-48:C>A-48:C>A	LG2	141.497
3524079|F|0-12:G>T-12:G>T	LG2	141.497	Vfaba.Hedin2.R1.2g148040
32612690|F|0-11:C>T-11:C>T	LG2	141.497	Vfaba.Hedin2.R1.2g147360
13864774|F|0-30:C>A-30:C>A	LG2	141.497
18318759|F|0-5:A>G-5:A>G	LG2	141.497	Vfaba.Hedin2.R1.2g148440
18318826|F|0-42:A>T-42:A>T	LG2	141.828	Vfaba.Hedin2.R1.2g147440
13908762|F|0-40:T>C-40:T>C	LG2	141.828
3512318|F|0-34:G>T-34:G>T	LG2	141.828	Vfaba.Hedin2.R1.2g147560
3524426|F|0-65:T>A-65:T>A	LG2	142.16	Vfaba.Hedin2.R1.2g148760
3521105|F|0-34:T>C-34:T>C	LG2	142.16	Vfaba.Hedin2.R1.2g148760
3517395|F|0-5:C>A-5:C>A	LG2	142.16
3517501|F|0-22:C>T-22:C>T	LG2	142.491	Vfaba.Hedin2.R1.2g149040
3519874|F|0-19:A>C-19:A>C	LG2	142.491
3519606|F|0-52:C>T-52:C>T	LG2	143.156	Vfaba.Hedin2.R1.2g150640
39982959|F|0-27:A>G-27:A>G	LG2	143.156	Vfaba.Hedin2.R1.2g149000
39977748|F|0-20:A>C-20:A>C	LG2	143.82
3513574|F|0-51:G>A-51:G>A	LG2	144.151	Vfaba.Hedin2.R1.2g148040
3522199|F|0-6:A>G-6:A>G	LG2	145.149	Vfaba.Hedin2.R1.2g150360
39980884|F|0-61:T>A-61:T>A	LG2	145.149
3511666|F|0-58:G>A-58:G>A	LG2	145.813
3519984|F|0-23:C>T-23:C>T	LG2	146.144
3509076|F|0-18:G>A-18:G>A	LG2	146.144
3529014|F|0-40:C>T-40:C>T	LG2	146.144
13910855|F|0-48:C>T-48:C>T	LG2	146.144
13911646|F|0-46:C>T-46:C>T	LG2	146.809	Vfaba.Hedin2.R1.2g150640
13868237|F|0-18:C>T-18:C>T	LG2	146.809
39978507|F|0-8:T>C-8:T>C	LG2	147.14	Vfaba.Hedin2.R1.2g150560
22857647|F|0-26:T>C-26:T>C	LG2	147.804
3522891|F|0-17:A>T-17:A>T	LG2	147.804
13864925|F|0-66:G>A-66:G>A	LG2	148.136	Vfaba.Hedin2.R1.2g151920
13911767|F|0-61:T>C-61:T>C	LG2	148.136
3522640|F|0-7:G>A-7:G>A	LG2	148.136	Vfaba.Hedin2.R1.2g149200
13869298|F|0-12:C>T-12:C>T	LG2	148.8
3519768|F|0-11:C>G-11:C>G	LG2	151.14
3510253|F|0-56:A>G-56:A>G	LG2	151.14
39982809|F|0-31:G>A-31:G>A	LG2	151.472
3521005|F|0-37:T>C-37:T>C	LG2	152.804	Vfaba.Hedin2.R1.2g154960
22857003|F|0-33:T>C-33:T>C	LG2	153.801	Vfaba.Hedin2.R1.2g156400
13867399|F|0-20:G>A-20:G>A	LG2	153.801
3521512|F|0-30:G>A-30:G>A	LG2	153.801	Vfaba.Hedin2.R1.2g156240
13868122|F|0-65:G>A-65:G>A	LG2	153.801
39972609|F|0-68:T>A-68:T>A	LG2	153.801
39974432|F|0-28:G>T-28:G>T	LG2	156.141
3522971|F|0-41:C>A-41:C>A	LG2	156.805
39982371|F|0-8:A>G-8:A>G	LG2	157.137
32612069|F|0-53:G>A-53:G>A	LG2	157.469	Vfaba.Hedin2.R1.2g158840
3531199|F|0-43:T>G-43:T>G	LG2	157.469	Vfaba.Hedin2.R1g326600
3513186|F|0-15:C>T-15:C>T	LG2	157.469	Vfaba.Hedin2.R1.2g158520
3508117|F|0-59:G>A-59:G>A	LG2	157.469	Vfaba.Hedin2.R1.3g019400
3530319|F|0-43:G>A-43:G>A	LG2	157.469
3521407|F|0-54:C>T-54:C>T	LG2	157.469	Vfaba.Hedin2.R1.2g158080
3529525|F|0-40:T>C-40:T>C	LG2	158.133
13904267|F|0-14:C>T-14:C>T	LG2	158.464	Vfaba.Hedin2.R1.2g159040
13865575|F|0-42:T>G-42:T>G	LG2	159.796	Vfaba.Hedin2.R1.2g159960
22857099|F|0-20:C>G-20:C>G	LG2	159.796
3508846|F|0-7:G>A-7:G>A	LG2	159.796
39973782|F|0-28:G>A-28:G>A	LG2	159.796	Vfaba.Hedin2.R1.2g161960
3522443|F|0-23:T>C-23:T>C	LG2	160.128	Vfaba.Hedin2.R1.2g160000
13911696|F|0-39:C>T-39:C>T	LG2	160.128	Vfaba.Hedin2.R1.2g160800
3522327|F|0-8:A>T-8:A>T	LG2	160.128	Vfaba.Hedin2.R1.4g118760
39979160|F|0-20:A>C-20:A>C	LG2	160.128	Vfaba.Hedin2.R1.2g161600
13909016|F|0-64:T>C-64:T>C	LG2	160.792	Vfaba.Hedin2.R1.2g161920
3522907|F|0-47:A>T-47:A>T	LG2	160.792
3521189|F|0-17:G>A-17:G>A	LG2	161.123	Vfaba.Hedin2.R1.2g162320
3529738|F|0-39:G>C-39:G>C	LG2	162.121
39977090|F|0-18:T>C-18:T>C	LG2	162.453
3521127|F|0-5:C>T-5:C>T	LG2	164.121
13865926|F|0-28:A>T-28:A>T	LG2	165.119
13868850|F|0-24:T>G-24:T>G	LG2	165.119
3529699|F|0-50:C>A-50:C>A	LG2	165.119
3521252|F|0-45:G>T-45:G>T	LG2	165.119
3523798|F|0-38:T>C-38:T>C	LG2	165.119	Vfaba.Hedin2.R1.2g165760
13868767|F|0-42:G>A-42:G>A	LG2	165.451
3527476|F|0-5:G>A-5:G>A	LG2	165.451
13868500|F|0-54:A>G-54:A>G	LG2	165.782	Vfaba.Hedin2.R1.2g167840
13868501|F|0-51:A>G-51:A>G	LG2	165.782	Vfaba.Hedin2.R1.2g167840
13867646|F|0-61:G>A-61:G>A	LG2	165.782
3526745|F|0-15:A>G-15:A>G	LG2	167.452	Vfaba.Hedin2.R1.2g169560
39979233|F|0-20:C>G-20:C>G	LG2	167.452
3521995|F|0-10:T>C-10:T>C	LG2	167.783
32613468|F|0-31:T>G-31:T>G	LG2	167.783
3525878|F|0-51:T>C-51:T>C	LG2	167.783	Vfaba.Hedin2.R1.2g170000
13909481|F|0-18:G>T-18:G>T	LG2	168.448
3520722|F|0-44:A>T-44:A>T	LG2	168.78
13904389|F|0-34:C>T-34:C>T	LG2	169.778
13912392|F|0-6:G>C-6:G>C	LG2	169.778
39972040|F|0-30:C>T-30:C>T	LG2	169.778
3517039|F|0-28:A>G-28:A>G	LG2	170.442
13913084|F|0-25:T>C-25:T>C	LG2	170.442	Vfaba.Hedin2.R1g419240
3513090|F|0-22:C>A-22:C>A	LG2	170.442	Vfaba.Hedin2.R1.2g174600
3531856|F|0-60:G>T-60:G>T	LG2	170.442
13864757|F|0-11:A>T-11:A>T	LG2	170.442
3519658|F|0-5:G>C-5:G>C	LG2	170.442
3531312|F|0-67:T>C-67:T>C	LG2	171.441	Vfaba.Hedin2.R1.2g175240
22856543|F|0-7:G>A-7:G>A	LG2	173.111
3526726|F|0-27:G>A-27:G>A	LG2	173.111
3520263|F|0-15:C>A-15:C>A	LG2	173.111	Vfaba.Hedin2.R1.2g177880
3510459|F|0-30:A>C-30:A>C	LG2	174.781
3523691|F|0-58:C>T-58:C>T	LG2	174.781
3517992|F|0-12:G>A-12:G>A	LG2	174.781
3526782|F|0-37:A>G-37:A>G	LG2	176.789	Vfaba.Hedin2.R1.2g181920
32609367|F|0-66:A>T-66:A>T	LG2	177.121	Vfaba.Hedin2.R1.2g182480
3519271|F|0-22:C>G-22:C>G	LG2	177.121
39976528|F|0-19:G>A-19:G>A	LG2	178.455
3518179|F|0-19:A>G-19:A>G	LG2	178.786	Vfaba.Hedin2.R1.Ung013280.2
3530708|F|0-6:G>A-6:G>A	LG2	178.786	Vfaba.Hedin2.R1.2g183680
13867687|F|0-33:T>G-33:T>G	LG2	179.118
32608456|F|0-18:G>T-18:G>T	LG2	180.117	Vfaba.Hedin2.R1.2g184920
3509571|F|0-57:A>G-57:A>G	LG2	180.117	Vfaba.Hedin2.R1.2g184920
3521510|F|0-68:T>A-68:T>A	LG2	180.117	Vfaba.Hedin2.R1.2g185080
39973017|F|0-9:C>T-9:C>T	LG2	180.781	Vfaba.Hedin2.R1.Ung004600
3523474|F|0-45:G>A-45:G>A	LG2	181.78	Vfaba.Hedin2.R1.2g186920
3521827|F|0-62:G>C-62:G>C	LG2	181.78	Vfaba.Hedin2.R1.2g187920
13865148|F|0-6:C>T-6:C>T	LG2	182.778
3520728|F|0-42:T>C-42:T>C	LG2	182.778
3513276|F|0-50:T>C-50:T>C	LG2	182.778	Vfaba.Hedin2.R1.2g189040
3527667|F|0-8:C>T-8:C>T	LG2	183.11
3520355|F|0-11:C>T-11:C>T	LG2	183.11	Vfaba.Hedin2.R1.2g187480
13864758|F|0-34:T>C-34:T>C	LG2	183.11	Vfaba.Hedin2.R1.2g187880
13909730|F|0-27:C>T-27:C>T	LG2	183.11
32610726|F|0-48:C>T-48:C>T	LG2	183.11
13868869|F|0-11:T>C-11:T>C	LG2	187.176
13866788|F|0-42:C>T-42:C>T	LG2	187.176
13864932|F|0-48:G>A-48:G>A	LG2	187.176
3531848|F|0-67:A>G-67:A>G	LG2	187.176
39973961|F|0-64:C>G-64:C>G	LG2	187.176	Vfaba.Hedin2.R1.2g193480
3531875|F|0-33:G>C-33:G>C	LG2	188.51
3523557|F|0-12:A>T-12:A>T	LG2	188.51
3524432|F|0-41:G>A-41:G>A	LG2	189.175
13867395|F|0-7:T>C-7:T>C	LG2	189.84
18320289|F|0-44:G>T-44:G>T	LG2	189.84
3515135|F|0-13:T>C-13:T>C	LG2	190.172	Vfaba.Hedin2.R1.Ung093920
3519322|F|0-14:C>A-14:C>A	LG2	190.172
13868868|F|0-29:T>C-29:T>C	LG2	190.172
39976830|F|0-28:A>G-28:A>G	LG2	191.843	Vfaba.Hedin2.R1.2g197040
39978994|F|0-10:C>T-10:C>T	LG2	191.843
3517276|F|0-26:G>C-26:G>C	LG2	191.843
3527414|F|0-5:T>A-5:T>A	LG2	192.174
39972848|F|0-12:T>C-12:T>C	LG2	192.174
3512387|F|0-31:A>T-31:A>T	LG2	192.174	Vfaba.Hedin2.R1.2g197920
32613404|F|0-30:A>G-30:A>G	LG2	192.174
3514757|F|0-26:A>G-26:A>G	LG2	193.173
3522422|F|0-36:T>A-36:T>A	LG2	193.173
3522706|F|0-32:C>G-32:C>G	LG2	194.507	Vfaba.Hedin2.R1.Ung034880
3530561|F|0-10:G>C-10:G>C	LG2	194.839	Vfaba.Hedin2.R1.2g200000
3523495|F|0-30:C>T-30:C>T	LG2	194.839	Vfaba.Hedin2.R1.2g200600
3531282|F|0-14:G>A-14:G>A	LG2	194.839	Vfaba.Hedin2.R1.Ung034840
3515678|F|0-25:A>G-25:A>G	LG2	194.839
3521546|F|0-56:T>A-56:T>A	LG2	195.503	Vfaba.Hedin2.R1.2g200520
3527792|F|0-26:G>A-26:G>A	LG2	195.503
39977470|F|0-60:C>T-60:C>T	LG2	195.835	Vfaba.Hedin2.R1.2g200000
3509549|F|0-41:C>T-41:C>T	LG2	195.835	Vfaba.Hedin2.R1.2g201160
3521369|F|0-9:T>C-9:T>C	LG2	197.506	Vfaba.Hedin2.R1.2g203960
13866029|F|0-23:T>G-23:T>G	LG2	198.84	Vfaba.Hedin2.R1.2g206000
13911879|F|0-28:A>G-28:A>G	LG2	198.84	Vfaba.Hedin2.R1.2g205760
3519491|F|0-8:C>A-8:C>A	LG2	198.84
13866481|F|0-45:C>T-45:C>T	LG2	198.84	Vfaba.Hedin2.R1.2g077640
32609497|F|0-42:T>C-42:T>C	LG2	198.84	Vfaba.Hedin2.R1.2g205200
13904651|F|0-36:A>G-36:A>G	LG2	199.838
3521294|F|0-65:T>C-65:T>C	LG2	200.17	Vfaba.Hedin2.R1.2g206480.2
13911098|F|0-26:T>C-26:T>C	LG2	200.17	Vfaba.Hedin2.R1.2g206480.2
3507762|F|0-12:A>T-12:A>T	LG2	201.168
13910638|F|0-30:T>C-30:T>C	LG2	201.5
3525078|F|0-51:A>G-51:A>G	LG2	201.5
3520607|F|0-11:C>G-11:C>G	LG2	202.834
3512537|F|0-16:G>C-16:G>C	LG2	202.834	Vfaba.Hedin2.R1g337240
13866619|F|0-6:C>A-6:C>A	LG2	202.834
3528096|F|0-67:A>T-67:A>T	LG2	202.834	Vfaba.Hedin2.R1.2g207520
3520845|F|0-65:G>A-65:G>A	LG2	202.834	Vfaba.Hedin2.R1.2g208080
3518265|F|0-8:T>C-8:T>C	LG2	202.834
13913387|F|0-26:T>C-26:T>C	LG2	203.166	Vfaba.Hedin2.R1.2g210040
3520376|F|0-49:T>C-49:T>C	LG2	203.166	Vfaba.Hedin2.R1.2g209880
13864967|F|0-63:C>T-63:C>T	LG2	203.83	Vfaba.Hedin2.R1.2g210320
13868088|F|0-32:G>A-32:G>A	LG2	204.495
13868296|F|0-14:T>C-14:T>C	LG2	204.495
39981730|F|0-56:G>C-56:G>C	LG2	204.495
13863624|F|0-39:A>C-39:A>C	LG2	206.165
3523251|F|0-49:G>A-49:G>A	LG2	206.497
13904641|F|0-63:C>T-63:C>T	LG2	206.497	Vfaba.Hedin2.R1.2g212000
13910525|F|0-20:T>C-20:T>C	LG2	206.497
39973848|F|0-38:C>T-38:C>T	LG2	207.162	Vfaba.Hedin2.R1.3g141360
3522301|F|0-60:T>A-60:T>A	LG2	208.495	Vfaba.Hedin2.R1.2g212520
3519815|F|0-30:T>C-30:T>C	LG2	208.495	Vfaba.Hedin2.R1.2g212520
3520356|F|0-26:C>T-26:C>T	LG2	208.495
13912280|F|0-37:A>G-37:A>G	LG2	208.827
32612935|F|0-46:G>A-46:G>A	LG2	209.825	Vfaba.Hedin2.R1.2g184280
3520373|F|0-61:G>A-61:G>A	LG2	210.157
3521092|F|0-13:G>C-13:G>C	LG2	210.489	Vfaba.Hedin2.R1.2g214120
3516579|F|0-66:A>G-66:A>G	LG2	210.489
39980518|F|0-45:T>C-45:T>C	LG2	210.489	Vfaba.Hedin2.R1.2g216360
13911664|F|0-39:A>G-39:A>G	LG2	211.822
3516121|F|0-36:C>G-36:C>G	LG2	211.822
32612775|F|0-27:T>C-27:T>C	LG2	212.154	Vfaba.Hedin2.R1.6g101000
3531883|F|0-28:A>G-28:A>G	LG2	212.485
39972314|F|0-11:A>G-11:A>G	LG2	212.485
3522203|F|0-21:C>T-21:C>T	LG2	213.484
3511378|F|0-31:G>T-31:G>T	LG2	213.484	Vfaba.Hedin2.R1.2g219560
39977150|F|0-16:A>G-16:A>G	LG2	215.154	Vfaba.Hedin2.R1g104800
3511172|F|0-20:T>A-20:T>A	LG2	217.84
3527305|F|0-24:G>A-24:G>A	LG2	217.84	Vfaba.Hedin2.R1.2g220000
13904991|F|0-9:T>A-9:T>A	LG2	217.84	Vfaba.Hedin2.R1.2g219920
3515681|F|0-27:G>A-27:G>A	LG2	217.84
3531637|F|0-14:C>T-14:C>T	LG2	217.84
13866517|F|0-49:T>C-49:T>C	LG2	217.84
3520485|F|0-29:A>G-29:A>G	LG2	218.839	Vfaba.Hedin2.R1.2g221440
3526060|F|0-27:C>T-27:C>T	LG2	218.839
13910816|F|0-64:T>C-64:T>C	LG2	218.839
39973525|F|0-42:T>A-42:T>A	LG2	220.845	Vfaba.Hedin2.R1.2g223120
32611953|F|0-17:G>T-17:G>T	LG2	221.177
3531670|F|0-11:A>C-11:A>C	LG2	221.177
3522943|F|0-31:A>G-31:A>G	LG2	221.177	Vfaba.Hedin2.R1.2g223920
3514393|F|0-17:A>G-17:A>G	LG2	221.177
39983081|F|0-10:G>A-10:G>A	LG2	221.177
3524259|F|0-37:T>C-37:T>C	LG2	221.177	Vfaba.Hedin2.R1.2g224200
3511172|F|0-17:C>T-17:C>T	LG2	222.511
13863191|F|0-9:A>T-9:A>T	LG2	223.175
3524756|F|0-24:C>A-24:C>A	LG2	223.175
18321641|F|0-29:T>C-29:T>C	LG2	224.174	Vfaba.Hedin2.R1.2g227200
3524685|F|0-67:C>T-67:C>T	LG2	224.174
3522183|F|0-47:C>T-47:C>T	LG2	224.174	Vfaba.Hedin2.R1.2g227160
13913677|F|0-14:G>T-14:G>T	LG2	225.508	Vfaba.Hedin2.R1.4g017480
13865039|F|0-55:A>T-55:A>T	LG2	226.172
13866791|F|0-58:G>A-58:G>A	LG2	226.172
3507914|F|0-17:G>C-17:G>C	LG2	226.172
39982396|F|0-43:T>C-43:T>C	LG2	226.504
13910656|F|0-58:G>A-58:G>A	LG2	226.504	Vfaba.Hedin2.R1.2g230800
13868153|F|0-58:G>A-58:G>A	LG2	226.504	Vfaba.Hedin2.R1.2g229920
3513686|F|0-32:G>A-32:G>A	LG2	227.168	Vfaba.Hedin2.R1.2g232880
3522854|F|0-54:A>T-54:A>T	LG2	227.168	Vfaba.Hedin2.R1.2g232880
13867543|F|0-29:C>G-29:C>G	LG2	227.168
32610460|F|0-40:C>A-40:C>A	LG2	227.833
13869386|F|0-18:C>T-18:C>T	LG2	229.167	Vfaba.Hedin2.R1.2g234800
3521177|F|0-8:G>A-8:G>A	LG2	232.539	Vfaba.Hedin2.R1.2g236240
3520287|F|0-7:C>T-7:C>T	LG2	232.539	Vfaba.Hedin2.R1.2g236400
39980703|F|0-13:A>C-13:A>C	LG2	233.203
13869435|F|0-15:T>A-15:T>A	LG2	233.203
32612885|F|0-19:T>A-19:T>A	LG2	233.203
3530143|F|0-57:A>G-57:A>G	LG2	237.263	Vfaba.Hedin2.R1.2g234520
39980222|F|0-28:T>A-28:T>A	LG2	237.595	Vfaba.Hedin2.R1.2g233920
3521007|F|0-34:A>G-34:A>G	LG2	239.264	Vfaba.Hedin2.R1.2g232600
3507470|F|0-45:G>A-45:G>A	LG2	241.271	Vfaba.Hedin2.R1.2g235160
3523829|F|0-14:A>C-14:A>C	LG2	241.935
3512089|F|0-67:C>T-67:C>T	LG2	244.28	Vfaba.Hedin2.R1.2g236920
32612885|F|0-12:T>G-12:T>G	LG2	245.278
3517860|F|0-6:C>T-6:C>T	LG2	245.61
3515978|F|0-35:C>T-35:C>T	LG2	246.608
18320419|F|0-35:T>C-35:T>C	LG2	246.608
3530949|F|0-65:T>G-65:T>G	LG2	246.608
13910601|F|0-30:T>G-30:T>G	LG2	247.273
3523949|F|0-35:T>G-35:T>G	LG2	247.604
13867382|F|0-35:C>A-35:C>A	LG2	249.274
39974244|F|0-18:T>C-18:T>C	LG2	250.272
3523657|F|0-45:G>A-45:G>A	LG2	250.272	Vfaba.Hedin2.R1.2g242680
3515507|F|0-6:A>G-6:A>G	LG2	250.272
32611215|F|0-12:A>G-12:A>G	LG2	251.606
3519713|F|0-37:A>T-37:A>T	LG2	251.606	Vfaba.Hedin2.R1.2g244160
13911575|F|0-37:A>C-37:A>C	LG2	252.271
13909803|F|0-21:C>T-21:C>T	LG2	252.271
13910670|F|0-62:G>A-62:G>A	LG2	252.271	Vfaba.Hedin2.R1.2g245640
22856981|F|0-35:G>A-35:G>A	LG2	252.271
32609727|F|0-5:T>A-5:T>A	LG2	252.271
39976969|F|0-16:A>G-16:A>G	LG2	252.935
3507508|F|0-8:A>C-8:A>C	LG2	252.935
3524514|F|0-61:T>A-61:T>A	LG2	253.267
13908678|F|0-64:C>T-64:C>T	LG2	253.599	Vfaba.Hedin2.R1.2g245640
3531156|F|0-10:A>G-10:A>G	LG2	256.975	Vfaba.Hedin2.R1.Ung000160
39977625|F|0-61:C>T-61:C>T	LG2	258.31	Vfaba.Hedin2.R1.2g247280
3507055|F|0-24:G>A-24:G>A	LG2	258.31
3524444|F|0-56:G>A-56:G>A	LG2	260.659
13909049|F|0-67:G>T-67:G>T	LG2	260.659
13910939|F|0-59:A>G-59:A>G	LG2	263.008
13863631|F|0-23:G>C-23:G>C	LG2	263.673
3518984|F|0-10:C>T-10:C>T	LG2	263.673
3524941|F|0-32:A>T-32:A>T	LG2	264.671
13865328|F|0-56:A>G-56:A>G	LG2	266.005
13910641|F|0-8:T>C-8:T>C	LG2	267.004	Vfaba.Hedin2.R1.2g255960
3523692|F|0-19:T>C-19:T>C	LG2	267.004
39977197|F|0-38:C>T-38:C>T	LG2	268.675	Vfaba.Hedin2.R1.2g257120
3529468|F|0-28:G>A-28:G>A	LG2	269.674	Vfaba.Hedin2.R1g333280
3522524|F|0-33:A>G-33:A>G	LG2	269.674	Vfaba.Hedin2.R1g333280
3512545|F|0-26:C>G-26:C>G	LG2	272.022	Vfaba.Hedin2.R1.3g025000
22857453|F|0-49:G>A-49:G>A	LG2	272.687	Vfaba.Hedin2.R1.2g263880
13909195|F|0-26:A>T-26:A>T	LG2	273.351
3528261|F|0-30:A>G-30:A>G	LG2	273.351
32609789|F|0-27:G>C-27:G>C	LG2	273.351
3521522|F|0-34:A>T-34:A>T	LG2	273.683	Vfaba.Hedin2.R1.2g262320
13904650|F|0-13:A>C-13:A>C	LG2	274.015
3522564|F|0-39:G>A-39:G>A	LG2	275.685
39979349|F|0-20:A>G-20:A>G	LG2	275.685
39980287|F|0-31:C>T-31:C>T	LG2	276.016	Vfaba.Hedin2.R1.2g267120
13911820|F|0-6:C>T-6:C>T	LG2	276.016
13865330|F|0-26:G>A-26:G>A	LG2	276.348
3521090|F|0-37:C>T-37:C>T	LG2	276.348	Vfaba.Hedin2.R1.2g267680
3519521|F|0-27:A>G-27:A>G	LG2	277.347	Vfaba.Hedin2.R1.2g268360
3507021|F|0-68:T>A-68:T>A	LG2	278.011
39978323|F|0-21:C>T-21:C>T	LG2	278.676
3520665|F|0-35:G>A-35:G>A	LG2	278.676	Vfaba.Hedin2.R1.2g270720
22856056|F|0-37:T>C-37:T>C	LG2	279.34	Vfaba.Hedin2.R1.2g270520
32612130|F|0-31:C>T-31:C>T	LG2	279.672	Vfaba.Hedin2.R1.2g271080
13868614|F|0-54:A>G-54:A>G	LG2	279.672
3519613|F|0-8:G>C-8:G>C	LG2	279.672
39972888|F|0-18:T>C-18:T>C	LG2	279.672
32609694|F|0-61:G>A-61:G>A	LG2	280.337
13910551|F|0-13:G>A-13:G>A	LG2	280.337
13912211|F|0-11:A>C-11:A>C	LG2	280.337	Vfaba.Hedin2.R1.2g273400
13867456|F|0-37:T>C-37:T>C	LG2	280.337
32610067|F|0-6:T>C-6:T>C	LG2	280.337
13905146|F|0-12:G>C-12:G>C	LG2	281.001	Vfaba.Hedin2.R1.2g277120
3523199|F|0-62:A>G-62:A>G	LG2	281.001	Vfaba.Hedin2.R1.2g274480
13867350|F|0-45:G>A-45:G>A	LG2	281.001
3512542|F|0-12:G>C-12:G>C	LG2	281.001	Vfaba.Hedin2.R1.2g277320
13906334|F|0-13:C>T-13:C>T	LG2	281.001
39974841|F|0-65:T>G-65:T>G	LG2	281.001	Vfaba.Hedin2.R1.2g276360
3506958|F|0-64:T>C-64:T>C	LG3	0
13904543|F|0-32:C>T-32:C>T	LG3	0
3522781|F|0-41:T>A-41:T>A	LG3	0
39980004|F|0-44:A>T-44:A>T	LG3	0.664447
13908960|F|0-39:T>C-39:T>C	LG3	0.664447	Vfaba.Hedin2.R1.3g000280
3524175|F|0-34:A>G-34:A>G	LG3	0.664447
3528219|F|0-21:T>C-21:T>C	LG3	1.66287	Vfaba.Hedin2.R1.3g003720
39977943|F|0-48:C>G-48:C>G	LG3	1.66287
3524675|F|0-62:A>G-62:A>G	LG3	1.66287
13866637|F|0-32:C>T-32:C>T	LG3	1.99456
39972524|F|0-59:G>A-59:G>A	LG3	2.65897	Vfaba.Hedin2.R1.3g000400
13904824|F|0-39:C>T-39:C>T	LG3	2.65897	Vfaba.Hedin2.R1.3g007000
13867412|F|0-23:G>A-23:G>A	LG3	3.99248
32609171|F|0-25:A>G-25:A>G	LG3	3.99248	Vfaba.Hedin2.R1.3g001880
13913210|F|0-20:C>G-20:C>G	LG3	3.99248	Vfaba.Hedin2.R1.3g002320
13909119|F|0-65:T>C-65:T>C	LG3	3.99248
39980187|F|0-30:C>G-30:C>G	LG3	3.99248
13908878|F|0-36:A>C-36:A>C	LG3	3.99248	Vfaba.Hedin2.R1.3g001280
3530911|F|0-24:A>G-24:A>G	LG3	4.32417	Vfaba.Hedin2.R1.3g007080
39979067|F|0-31:C>T-31:C>T	LG3	4.32417	Vfaba.Hedin2.R1.3g002960
13868161|F|0-56:T>A-56:T>A	LG3	4.32417
13865301|F|0-12:G>A-12:G>A	LG3	4.65586	Vfaba.Hedin2.R1.3g007080
32608460|F|0-11:G>A-11:G>A	LG3	4.65586
3528322|F|0-12:C>T-12:C>T	LG3	5.32027
3512288|F|0-18:G>A-18:G>A	LG3	5.98472	Vfaba.Hedin2.R1.3g008360
18314603|F|0-68:T>G-68:T>G	LG3	5.98472
3511726|F|0-28:T>C-28:T>C	LG3	6.31641
18318732|F|0-40:T>G-40:T>G	LG3	6.31641
13904526|F|0-45:G>T-45:G>T	LG3	6.6481
13869382|F|0-13:A>G-13:A>G	LG3	6.6481
13865250|F|0-11:A>G-11:A>G	LG3	6.6481	Vfaba.Hedin2.R1.3g011360
3523705|F|0-18:A>G-18:A>G	LG3	6.6481	Vfaba.Hedin2.R1.3g011280
18320440|F|0-61:C>T-61:C>T	LG3	6.6481	Vfaba.Hedin2.R1.3g010720
13912786|F|0-21:A>G-21:A>G	LG3	6.6481	Vfaba.Hedin2.R1.3g010560
3520523|F|0-52:C>T-52:C>T	LG3	6.6481	Vfaba.Hedin2.R1.3g009560
13864974|F|0-5:C>T-5:C>T	LG3	8.31846
3525915|F|0-21:T>C-21:T>C	LG3	8.98302
3523972|F|0-27:C>G-27:C>G	LG3	9.64752
39973912|F|0-15:T>C-15:T>C	LG3	11.3181	Vfaba.Hedin2.R1.3g014960
13868168|F|0-50:A>C-50:A>C	LG3	12.3169
39982815|F|0-26:G>A-26:G>A	LG3	12.3169
3507247|F|0-12:G>A-12:G>A	LG3	12.9815	Vfaba.Hedin2.R1.3g015040
3520085|F|0-19:A>G-19:A>G	LG3	13.6462
3518910|F|0-43:C>T-43:C>T	LG3	13.6462	Vfaba.Hedin2.R1.3g015360
13910959|F|0-44:C>G-44:C>G	LG3	13.6462	Vfaba.Hedin2.R1.3g015360
13904923|F|0-61:T>C-61:T>C	LG3	13.6462
3508343|F|0-65:A>T-65:A>T	LG3	14.9808
3522561|F|0-27:T>G-27:T>G	LG3	14.9808
3522519|F|0-33:A>T-33:A>T	LG3	15.9799
3509962|F|0-15:A>G-15:A>G	LG3	15.9799
3520613|F|0-48:A>C-48:A>C	LG3	15.9799
3523669|F|0-27:A>G-27:A>G	LG3	17.9897
3522534|F|0-39:G>C-39:G>C	LG3	18.6543
3523293|F|0-61:A>G-61:A>G	LG3	18.6543	Vfaba.Hedin2.R1.3g019560
39973933|F|0-21:T>C-21:T>C	LG3	18.6543
3520011|F|0-53:C>T-53:C>T	LG3	18.6543
39972153|F|0-28:A>T-28:A>T	LG3	20.3253
32608475|F|0-33:A>G-33:A>G	LG3	23.6995	Vfaba.Hedin2.R1.3g022520
22856716|F|0-6:A>G-6:A>G	LG3	23.6995
13869034|F|0-23:T>C-23:T>C	LG3	23.6995
3516204|F|0-21:C>G-21:C>G	LG3	24.0312
3532209|F|0-64:A>T-64:A>T	LG3	24.6956
39972604|F|0-29:T>C-29:T>C	LG3	27.7245	Vfaba.Hedin2.R1.3g024320
3520318|F|0-37:G>A-37:G>A	LG3	27.7245	Vfaba.Hedin2.R1.3g024080
3507790|F|0-29:C>T-29:C>T	LG3	28.389
32612391|F|0-53:C>T-53:C>T	LG3	28.389
3518912|F|0-6:T>A-6:T>A	LG3	28.7207	Vfaba.Hedin2.R1.3g024760
39972064|F|0-58:G>T-58:G>T	LG3	28.7207	Vfaba.Hedin2.R1.3g024800
13910591|F|0-66:T>C-66:T>C	LG3	28.7207
3520654|F|0-23:C>T-23:C>T	LG3	29.0524
22857555|F|0-21:A>G-21:A>G	LG3	29.3841	Vfaba.Hedin2.R1.3g028680
3520013|F|0-8:C>T-8:C>T	LG3	30.0485
13910603|F|0-34:A>G-34:A>G	LG3	30.3802
13868831|F|0-30:C>A-30:C>A	LG3	30.3802
3531038|F|0-13:T>G-13:T>G	LG3	30.3802	Vfaba.Hedin2.R1.3g035040
3530471|F|0-67:C>A-67:C>A	LG3	30.3802
13869109|F|0-16:C>T-16:C>T	LG3	32.3871
3511342|F|0-22:A>C-22:A>C	LG3	32.3871	Vfaba.Hedin2.R1.3g025960
3532570|F|0-40:A>C-40:A>C	LG3	32.7188
3521069|F|0-16:G>A-16:G>A	LG3	33.3832
13869129|F|0-60:T>C-60:T>C	LG3	34.0476
3522375|F|0-15:T>C-15:T>C	LG3	34.0476	Vfaba.Hedin2.R1.3g028680
13868819|F|0-7:T>C-7:T>C	LG3	34.0476
13909657|F|0-6:C>G-6:C>G	LG3	34.3793	Vfaba.Hedin2.R1.2g124840
13865276|F|0-35:A>C-35:A>C	LG3	34.711
39983258|F|0-22:A>T-22:A>T	LG3	35.7094
3510281|F|0-56:T>A-56:T>A	LG3	35.7094
3525468|F|0-9:T>G-9:T>G	LG3	35.7094
3521346|F|0-18:T>C-18:T>C	LG3	36.0411	Vfaba.Hedin2.R1.3g026840
13908891|F|0-19:A>G-19:A>G	LG3	36.0411	Vfaba.Hedin2.R1.2g083880
3509747|F|0-10:C>G-10:C>G	LG3	36.0411	Vfaba.Hedin2.R1.3g037800
3518477|F|0-13:C>G-13:C>G	LG3	37.7111
3522049|F|0-58:A>C-58:A>C	LG3	37.7111
13911277|F|0-21:T>C-21:T>C	LG3	40.0582
39978945|F|0-38:G>A-38:G>A	LG3	41.729
3532296|F|0-42:A>G-42:A>G	LG3	41.729
32611362|F|0-26:A>G-26:A>G	LG3	41.729	Vfaba.Hedin2.R1.3g039840
39979685|F|0-9:T>A-9:T>A	LG3	41.729	Vfaba.Hedin2.R1.Ung025640
3507191|F|0-21:G>A-21:G>A	LG3	41.729	Vfaba.Hedin2.R1.3g039880
13912303|F|0-46:C>T-46:C>T	LG3	42.3936	Vfaba.Hedin2.R1.3g039840
13866484|F|0-20:T>A-20:T>A	LG3	42.3936
3529448|F|0-25:C>G-25:C>G	LG3	42.7254	Vfaba.Hedin2.R1.3g040720
13913318|F|0-32:A>G-32:A>G	LG3	42.7254
13908733|F|0-11:A>C-11:A>C	LG3	43.39
3519776|F|0-10:G>T-10:G>T	LG3	44.0547	Vfaba.Hedin2.R1.3g047680
39975851|F|0-13:T>C-13:T>C	LG3	44.3864	Vfaba.Hedin2.R1.3g047560
3517984|F|0-16:C>T-16:C>T	LG3	44.7181
13912906|F|0-27:C>T-27:C>T	LG3	44.7181
13912907|F|0-44:T>A-44:T>A	LG3	44.7181
3528250|F|0-6:G>A-6:G>A	LG3	44.7181	Vfaba.Hedin2.R1.3g047040
39983009|F|0-32:A>G-32:A>G	LG3	46.0527
13905080|F|0-41:G>A-41:G>A	LG3	46.3844
13911632|F|0-14:G>T-14:G>T	LG3	46.3844
13868477|F|0-37:T>C-37:T>C	LG3	47.049
3522510|F|0-28:A>T-28:A>T	LG3	48.3835
3523178|F|0-49:T>C-49:T>C	LG3	48.3835	Vfaba.Hedin2.R1.3g044680
3511595|F|0-49:C>T-49:C>T	LG3	50.0557
3520390|F|0-36:G>C-36:G>C	LG3	52.4079
39974743|F|0-14:A>G-14:A>G	LG3	56.84
3512676|F|0-12:A>G-12:A>G	LG3	56.84	Vfaba.Hedin2.R1g483480
3510364|F|0-11:C>A-11:C>A	LG3	56.84
13909025|F|0-36:C>T-36:C>T	LG3	57.1718
32611709|F|0-33:T>A-33:T>A	LG3	57.1718
3520971|F|0-45:G>A-45:G>A	LG3	57.1718	Vfaba.Hedin2.R1.3g052200
3508249|F|0-5:A>G-5:A>G	LG3	57.5036	Vfaba.Hedin2.R1.3g199600
3508283|F|0-56:G>A-56:G>A	LG3	57.5036	Vfaba.Hedin2.R1.3g053040
3521085|F|0-29:C>G-29:C>G	LG3	57.8353	Vfaba.Hedin2.R1.3g053240
22857619|F|0-8:G>C-8:G>C	LG3	58.5002	Vfaba.Hedin2.R1.3g054720
3519206|F|0-17:G>A-17:G>A	LG3	58.5002
13911570|F|0-64:A>G-64:A>G	LG3	58.5002
3511716|F|0-68:A>G-68:A>G	LG3	58.8319	Vfaba.Hedin2.R1.3g069600
3518629|F|0-8:T>C-8:T>C	LG3	60.842
13904478|F|0-49:T>C-49:T>C	LG3	60.842
3508824|F|0-49:G>A-49:G>A	LG3	60.842
3516238|F|0-37:T>A-37:T>A	LG3	61.5067
3521573|F|0-42:T>C-42:T>C	LG3	62.8412	Vfaba.Hedin2.R1.3g057160
3518407|F|0-30:T>A-30:T>A	LG3	62.8412	Vfaba.Hedin2.R1.3g056880
3522795|F|0-23:A>C-23:A>C	LG3	63.1729
13912938|F|0-47:C>T-47:C>T	LG3	63.5046
3522020|F|0-23:C>A-23:C>A	LG3	63.5046
3516910|F|0-33:C>A-33:C>A	LG3	63.5046	Vfaba.Hedin2.R1.3g056200
13909670|F|0-5:C>T-5:C>T	LG3	63.5046
3521374|F|0-20:T>G-20:T>G	LG3	64.5038	Vfaba.Hedin2.R1.3g057160
3514322|F|0-43:C>T-43:C>T	LG3	64.8355
3512228|F|0-60:C>A-60:C>A	LG3	65.5003	Vfaba.Hedin2.R1.3g058280
13911657|F|0-24:T>C-24:T>C	LG3	67.1725	Vfaba.Hedin2.R1.3g059240
3521530|F|0-64:G>C-64:G>C	LG3	67.1725	Vfaba.Hedin2.R1.3g059560
3532513|F|0-52:T>C-52:T>C	LG3	67.1725
3511964|F|0-49:C>T-49:C>T	LG3	67.5043
3529873|F|0-17:C>T-17:C>T	LG3	67.8361
3511488|F|0-54:T>C-54:T>C	LG3	68.5008	Vfaba.Hedin2.R1.3g062120
3516582|F|0-25:G>C-25:G>C	LG3	68.8326
13869067|F|0-9:C>T-9:C>T	LG3	68.8326
3529733|F|0-20:T>A-20:T>A	LG3	68.8326
3507184|F|0-18:T>C-18:T>C	LG3	68.8326	Vfaba.Hedin2.R1.3g062120
3516317|F|0-23:T>C-23:T>C	LG3	69.8316
3520396|F|0-54:T>C-54:T>C	LG3	69.8316
13869079|F|0-11:G>A-11:G>A	LG3	70.4963
3508681|F|0-25:T>A-25:T>A	LG3	70.4963
13904497|F|0-27:C>G-27:C>G	LG3	70.4963
13905212|F|0-44:T>C-44:T>C	LG3	70.4963
22855839|F|0-18:T>C-18:T>C	LG3	71.8307	Vfaba.Hedin2.R1.3g064760
3523238|F|0-57:A>G-57:A>G	LG3	72.1624	Vfaba.Hedin2.R1.3g063560
39978904|F|0-67:G>C-67:G>C	LG3	72.1624
13908862|F|0-6:G>A-6:G>A	LG3	72.827	Vfaba.Hedin2.R1.3g063600
3518328|F|0-12:G>A-12:G>A	LG3	72.827
13909921|F|0-29:A>T-29:A>T	LG3	72.827
13867420|F|0-30:A>G-30:A>G	LG3	72.827
18318770|F|0-53:C>T-53:C>T	LG3	72.827	Vfaba.Hedin2.R1.3g063520
3519355|F|0-25:G>A-25:G>A	LG3	73.1587
39982804|F|0-26:C>T-26:C>T	LG3	73.1587
39982755|F|0-30:A>G-30:A>G	LG3	73.1587
3525251|F|0-12:G>A-12:G>A	LG3	73.4904	Vfaba.Hedin2.R1.3g064680
3521590|F|0-28:C>T-28:C>T	LG3	73.8221	Vfaba.Hedin2.R1.Ung024600
3513148|F|0-60:G>A-60:G>A	LG3	75.1559
3507479|F|0-45:C>G-45:C>G	LG3	75.1559
3525152|F|0-11:A>G-11:A>G	LG3	75.1559
3511704|F|0-60:C>T-60:C>T	LG3	75.1559
3517210|F|0-48:T>A-48:T>A	LG3	75.1559
32610507|F|0-20:A>T-20:A>T	LG3	75.1559
3531774|F|0-24:T>C-24:T>C	LG3	75.8204	Vfaba.Hedin2.R1.3g064640
32611348|F|0-55:A>G-55:A>G	LG3	76.8187
39982827|F|0-20:A>G-20:A>G	LG3	76.8187	Vfaba.Hedin2.R1.3g203560
13911650|F|0-33:A>G-33:A>G	LG3	77.817	Vfaba.Hedin2.R1.3g068400
18319099|F|0-5:T>C-5:T>C	LG3	77.817
3511890|F|0-9:T>C-9:T>C	LG3	77.817
3517041|F|0-44:G>T-44:G>T	LG3	77.817	Vfaba.Hedin2.R1.3g203560
3520887|F|0-41:G>A-41:G>A	LG3	77.817
39982837|F|0-36:A>G-36:A>G	LG3	80.1637	Vfaba.Hedin2.R1.3g014280
3526976|F|0-50:G>T-50:G>T	LG3	80.4954	Vfaba.Hedin2.R1.3g071320
3518018|F|0-67:G>T-67:G>T	LG3	80.8271	Vfaba.Hedin2.R1.3g071160
3526948|F|0-17:A>G-17:A>G	LG3	81.1588
32611408|F|0-11:C>T-11:C>T	LG3	81.1588
3518881|F|0-19:A>G-19:A>G	LG3	81.8232	Vfaba.Hedin2.R1.3g070200
13866367|F|0-12:G>A-12:G>A	LG3	81.8232
3519191|F|0-24:C>G-24:C>G	LG3	81.8232	Vfaba.Hedin2.R1.3g069600
3519191|F|0-68:T>C-68:T>C	LG3	81.8232	Vfaba.Hedin2.R1.3g069600
18321002|F|0-7:A>G-7:A>G	LG3	81.8232	Vfaba.Hedin2.R1.3g070360
13912627|F|0-51:C>T-51:C>T	LG3	81.8232	Vfaba.Hedin2.R1.3g070200
32612120|F|0-53:G>A-53:G>A	LG3	82.8217
3512092|F|0-36:A>G-36:A>G	LG3	82.8217
3509073|F|0-23:G>A-23:G>A	LG3	84.8304
3520802|F|0-19:A>G-19:A>G	LG3	84.8304	Vfaba.Hedin2.R1.Ung030120
3506866|F|0-65:G>A-65:G>A	LG3	84.8304
3530377|F|0-14:C>G-14:C>G	LG3	85.1621
3526666|F|0-23:C>A-23:C>A	LG3	85.1621
3520923|F|0-38:C>A-38:C>A	LG3	85.1621
3512096|F|0-60:A>G-60:A>G	LG3	86.833	Vfaba.Hedin2.R1.3g074200
13868757|F|0-28:A>G-28:A>G	LG3	87.1648	Vfaba.Hedin2.R1.3g074200
39979317|F|0-14:C>T-14:C>T	LG3	87.4965	Vfaba.Hedin2.R1.3g074200
3527333|F|0-24:T>G-24:T>G	LG3	88.1612
3520650|F|0-38:G>A-38:G>A	LG3	88.1612	Vfaba.Hedin2.R1.3g074960
13904279|F|0-33:C>T-33:C>T	LG3	88.1612
3521788|F|0-42:A>G-42:A>G	LG3	88.4929	Vfaba.Hedin2.R1.3g066680
13910097|F|0-14:A>C-14:A>C	LG3	89.1575
3518953|F|0-64:C>T-64:C>T	LG3	89.4892
13908805|F|0-7:A>G-7:A>G	LG3	91.4982
39977558|F|0-11:A>G-11:A>G	LG3	92.1628
3530189|F|0-11:G>A-11:G>A	LG3	92.4945
32610358|F|0-33:C>T-33:C>T	LG3	92.4945
3522846|F|0-32:G>A-32:G>A	LG3	92.8262
13868103|F|0-44:T>G-44:T>G	LG3	93.1579	Vfaba.Hedin2.R1.3g080600
3511094|F|0-19:T>C-19:T>C	LG3	93.1579
13910496|F|0-51:T>C-51:T>C	LG3	93.1579	Vfaba.Hedin2.R1.3g078240
13869111|F|0-17:T>C-17:T>C	LG3	93.1579
3523042|F|0-60:T>C-60:T>C	LG3	93.1579	Vfaba.Hedin2.R1.Ung049160
3516389|F|0-30:C>T-30:C>T	LG3	93.4896
3520673|F|0-48:T>C-48:T>C	LG3	93.4896	Vfaba.Hedin2.R1.3g078160
3523948|F|0-36:A>G-36:A>G	LG3	93.4896
3523076|F|0-53:A>G-53:A>G	LG3	93.4896	Vfaba.Hedin2.R1g365480
13867615|F|0-40:G>A-40:G>A	LG3	93.4896	Vfaba.Hedin2.R1.3g080320
32610503|F|0-42:T>C-42:T>C	LG3	93.4896
22857350|F|0-23:A>G-23:A>G	LG3	93.4896	Vfaba.Hedin2.R1.3g078360
3508189|F|0-65:T>C-65:T>C	LG3	93.4896
3518831|F|0-32:C>A-32:C>A	LG3	95.8371	Vfaba.Hedin2.R1.3g083520.2
3518803|F|0-18:C>T-18:C>T	LG3	96.5016
3522563|F|0-50:C>T-50:C>T	LG3	96.5016	Vfaba.Hedin2.R1.3g083520.2
3519833|F|0-51:T>A-51:T>A	LG3	96.5016
3519645|F|0-14:C>G-14:C>G	LG3	96.5016
3524275|F|0-17:G>A-17:G>A	LG3	97.166
3525216|F|0-42:G>C-42:G>C	LG3	97.166
18318875|F|0-24:C>G-24:C>G	LG3	97.166
3517240|F|0-11:T>G-11:T>G	LG3	97.166
3514407|F|0-15:T>A-15:T>A	LG3	97.8305
3524547|F|0-13:A>C-13:A>C	LG3	98.4949
3518636|F|0-61:T>G-61:T>G	LG3	98.8265
13909821|F|0-21:T>C-21:T>C	LG3	98.8265
3515927|F|0-48:G>T-48:G>T	LG3	98.8265	Vfaba.Hedin2.R1.3g086960
3521693|F|0-33:A>G-33:A>G	LG3	98.8265	Vfaba.Hedin2.R1.3g087040
3527615|F|0-40:T>C-40:T>C	LG3	100.16	Vfaba.Hedin2.R1.3g087720
[truncated: 1,901 more rows]

## Sheet: Table_S2
Table S2: QTLs identified in 2017, 2019 and 2021. QTLs, growth stages and parental disease scores and intervals with peak and flanking markers and nearest associated gene of reference genome GCA_948472305.1 for Vicia faba "Hedin 2" (Jayakodi et al., 2023).
Experiment	score	NV293-4	NV640-6	stage	QTL	methods	start position	end position	start marker	peak marker	end marker	nearest gene to start	nearest gene to end	enclosed genes
2017	1 d.a.i.	0.9	1	podding	none	-	-	-	-	-	-	-	-	-
	4 d.a.i.	3.2	3.1	podding	none	-	-	-	-	-	-	-	-	-
	6 d.a.i.	4.2	4.3	podding	none	-	-	-	-	-	-	-	-	-
	8 d.a.i.	3.2	3.3	podding	none	-	-	-	-	-	-	-	-	-
	11 d.a.i.	4	4	podding	none	-	-	-	-	-	-	-	-	-
	13 d.a.i.	39	23.4		LG3@119.2	addqtl	72.8272	136.469	18318770|F|0-53:C>T-53:C>T	3531012|F|0-25:A>G-25:A>G	3517899|F|0-60:A>G-60:A>G	Vfaba.Hedin2.R1.3g063520	Vfaba.Hedin2.R1.3g138080	1468
					LG5@107.3	scanone	92.9259	115.739	13904965|F|0-30:A>G-30:A>G	3523827|F|0-34:G>T-34:G>T	3520939|F|0-40:T>C-40:T>C	Vfaba.Hedin2.R1.5g080080	Vfaba.Hedin2.R1.5g102200	414
					LG6@169.6	addqtl	141.616	181.014	39972222|F|0-16:A>G-16:A>G	13865455|F|0-55:G>A-55:G>A	3528850|F|0-39:T>C-39:T>C	Vfaba.Hedin2.R1.6g147240	Vfaba.Hedin2.R1.6g180560	642
	15 d.a.i.	50.4	29.1	podding	LG3@75.2a	scanone	70.4965	121.157	13905212|F|0-44:T>C-44:T>C	3525152|F|0-11:A>G-11:A>G	3522631|F|0-13:T>G-13:T>G	Vfaba.Hedin2.R1.3g062120	Vfaba.Hedin2.R1.3g123160	1214
					LG5@86.9	scanone	77.9637	95.2533	13905821|F|0-40:T>G-40:T>G	39978942|F|0-18:A>G-18:A>G	3513307|F|0-54:G>A-54:G>A	Vfaba.Hedin2.R1.5g050920	Vfaba.Hedin2.R1.5g079760	581
	19 d.a.i.	80.2	52.5	podding	LG2@68.4	addqtl	66.1056	70.1034	13913107|F|0-14:T>C-14:T>C	32612377|F|0-10:G>T-10:G>T	18318730|F|0-42:C>T-42:C>T	Vfaba.Hedin2.R1.2g060000	Vfaba.Hedin2.R1.2g070280	204
					LG3@115.2	scanone	109.502	118.502	32612739|F|0-30:G>A-30:G>A	3523038|F|0-55:C>T-55:C>T	3527795|F|0-36:C>A-36:C>A	Vfaba.Hedin2.R1.3g097240	Vfaba.Hedin2.R1.3g112040	293
					LG4@135.3	addqtl	132.923	136.254	3520285|F|0-7:T>C-7:T>C	3516313|F|0-32:C>T-32:C>T	3509011|F|0-40:G>C-40:G>C	Vfaba.Hedin2.R1.4g148200	Vfaba.Hedin2.R1.4g153880	106
					LG5@93.9	scanone	76.2935	95.2533	3512868|F|0-7:A>G-7:A>G	39973663|F|0-58:G>A-58:G>A	3513307|F|0-54:G>A-54:G>A	Vfaba.Hedin2.R1.5g050920	Vfaba.Hedin2.R1.5g083000	645
	21 d.a.i.	90.8	82.9	podding	none	-	-	-	-	-	-	-	-	-
	26 d.a.i.	98.1	97.1	podding	none	-	-	-	-	-	-	-	-	-
	AUDPC, 26 d.a.i.	1117.49	715.641	podding	LG5@79.6	scanone	74.286	96.2495	3515063|F|0-18:G>C-18:G>C	32610934|F|0-47:T>C-47:T>C	3517436|F|0-32:C>T-32:C>T	Vfaba.Hedin2.R1.5g050920	Vfaba.Hedin2.R1.5g088920	756
				podding	LG3@75.2b	scanone	70.4965	139.839	13905212|F|0-44:T>C-44:T>C	3525152|F|0-11:A>G-11:A>G	18320368|F|0-13:A>T-13:A>T	Vfaba.Hedin2.R1.3g062120	Vfaba.Hedin2.R1.3g138080	1496
2019	3 d.a.i.	7.18722	3.55778	flowering	LG3@144.5	scanone	132.451	157.504	3527468|F|0-28:G>A-28:G>A	3519623|F|0-6:G>A-6:G>A	13863180|F|0-9:C>A-9:C>A	Vfaba.Hedin2.R1.3g136320	Vfaba.Hedin2.R1.3g160360	437
	7 d.a.i.	88.3754	60.4711	flowering	LG2@50.1	scanone	42.7133	52.0763	3508609|F|0-16:A>G-16:A>G	3523603|F|0-22:G>C-22:G>C	3522268|F|0-20:C>A-20:C>A	Vfaba.Hedin2.R1.2g044000	Vfaba.Hedin2.R1.2g050400	121
					LG3@136.5	scanone	104.829	153.146	3520761|F|0-58:C>T-58:C>T	3518153|F|0-14:G>A-14:G>A	3531328|F|0-23:A>T-23:A>T	Vfaba.Hedin2.R1.3g092520	Vfaba.Hedin2.R1.3g157080	380
	10 d.a.i.	95.6855	80.9783	flowering / podding	LG2@102.1	scanone	74.8113	171.441	3528710|F|0-38:T>C-38:T>C	39977061|F|0-64:C>T-64:C>T	3531312|F|0-67:T>C-67:T>C	Vfaba.Hedin2.R1.2g070280	Vfaba.Hedin2.R1.2g175240	2077
	13 d.a.i.	96.8606	88.2704	podding	LG2@10.7	addqtl	0	50.0825	3508204|F|0-30:T>A-30:T>A	3523425|F|0-16:A>G-16:A>G	3523603|F|0-22:G>C-22:G>C	Vfaba.Hedin2.R1.2g007880	Vfaba.Hedin2.R1.2g049000	781
					LG2@171.4	scanone	164.121	173.111	3521127|F|0-5:C>T-5:C>T	13864757|F|0-11:A>T-11:A>T	22856543|F|0-7:G>A-7:G>A	Vfaba.Hedin2.R1.2g162320	Vfaba.Hedin2.R1.2g177880	301
	AUDPC, 13 d.a.i.	750.716	592.289	podding	LG2@169.8	scanone	152.804	173.111	3521005|F|0-37:T>C-37:T>C	39972040|F|0-30:C>T-30:C>T	22856543|F|0-7:G>A-7:G>A	Vfaba.Hedin2.R1.2g154960	Vfaba.Hedin2.R1.2g177880	449
2021	3 d.a.i.	0.595148	0.618285	vegetative	none	-	-	-	-	-	-	-	-	-
	8 d.a.i.	3.27647	2.65142	vegetative	none	-	-	-	-	-	-	-	-	-
	15 d.a.i.	6.99852	2.91457	vegetative	LG1@168.9	scanone	41.9746	195.572	3528875|F|0-52:G>C-52:G>C	32609644|F|0-27:A>G-27:A>G	3522233|F|0-21:C>T-21:C>T	Vfaba.Hedin2.R1g039440	Vfaba.Hedin2.R1g175080	2478
					LG3@27.7	scanone	13.6462	36.0412	13904923|F|0-61:T>C-61:T>C	39972604|F|0-29:T>C-29:T>C	3521346|F|0-18:T>C-18:T>C	Vfaba.Hedin2.R1.3g015360	Vfaba.Hedin2.R1.3g026840	250
	22 d.a.i.	11.7641	2.61878	flowering	none	-	-	-	-	-	-	-	-	-
	32 d.a.i.	30.8521	6.74168	flowering	LG2@84.5	scanone	55.4046	90.4744	3524309|F|0-62:T>C-62:T>C	13913141|F|0-43:A>G-43:A>G	3521247|F|0-15:G>A-15:G>A	Vfaba.Hedin2.R1.2g051840	Vfaba.Hedin2.R1.2g086640	695
					LG6@121.0	scanone	119.306	149.942	3522080|F|0-31:C>T-31:C>T	3523962|F|0-42:G>T-42:G>T	13912947|F|0-5:A>G-5:A>G	Vfaba.Hedin2.R1.6g129080	Vfaba.Hedin2.R1.6g157320	553
	44 d.a.i.	75.0225	10.3936	podding	LG3@24.7	scanone	20.3253	37.7112	39972153|F|0-28:A>T-28:A>T	3532209|F|0-64:A>T-64:A>T	3518477|F|0-13:C>G-13:C>G	Vfaba.Hedin2.R1.3g019560	Vfaba.Hedin2.R1.3g039840	409
					LG6@110.0a	scanone	106.301	117.641	3516700|F|0-8:C>T-8:C>T	3531569|F|0-5:A>G-5:A>G	13868881|F|0-21:T>C-21:T>C	Vfaba.Hedin2.R1.6g117280	Vfaba.Hedin2.R1.6g128080	207
	59 d.a.i.	98.8971	26.9627	podding	none	-	-	-	-	-	-	-	-	-
	73 d.a.i.	99.8003	52.5178	podding	none	-	-	-	-	-	-	-	-	-
	AUDPC, 73 d.a.i.	3602.04	895.75	podding	LG3@28.4	scanone	20.3253	37.7	39972153|F|0-28:A>T-28:A>T	3507790|F|0-29:C>T-29:C>T	3518477|F|0-13:C>G-13:C>G	Vfaba.Hedin2.R1.3g019560	Vfaba.Hedin2.R1.3g039840	409
					LG6@110.0b	scanone	105.638	116.976	3520483|F|0-33:G>C-33:G>C	3531569|F|0-5:A>G-5:A>G	3525493|F|0-20:T>C-20:T>C	Vfaba.Hedin2.R1.6g117280	Vfaba.Hedin2.R1.6g127400	196
2021	3 d.a.i.	0.595148	0.618285	vegetative	none	-	-	-	-	-	-	-	-	-
heterozygous phenotypes omitted	8 d.a.i.	3.27647	2.65142	vegetative	none	-	-	-	-	-	-	-	-	-
	15 d.a.i.	6.99852	2.91457	vegetative	LG3@27.7	scanone	24.0313	37.7112	3516204|F|0-21:C>G-21:C>G	39972604|F|0-29:T>C-29:T>C	3518477|F|0-13:C>G-13:C>G	Vfaba.Hedin2.R1.3g022520	Vfaba.Hedin2.R1.3g037800	307
	22 d.a.i.	11.7641	2.61878	flowering	none	-	-	-	-	-	-	-	-	-
	32 d.a.i.	30.8521	6.74168	flowering	LG1@48.3	scanone	44.6404	64.0859	13865537|F|0-8:G>C-8:G>C	3521794|F|0-50:G>A-50:G>A	3526846|F|0-47:T>C-47:T>C	Vfaba.Hedin2.R1.1g044680	Vfaba.Hedin2.R1.1g063000	318
					LG3@16.0	addqtl	5.3203	36.0412	3528322|F|0-12:C>T-12:C>T	3509962|F|0-15:A>G-15:A>G	3521346|F|0-18:T>C-18:T>C	Vfaba.Hedin2.R1.3g008360	Vfaba.Hedin2.R1.3g026840	405
					LG6@120.3	scanone	106.301	124.968	3516700|F|0-8:C>T-8:C>T	32612055|F|0-32:T>C-32:T>C	32613291|F|0-44:C>G-44:C>G	Vfaba.Hedin2.R1.6g120040	Vfaba.Hedin2.R1.6g134240	275
	44 d.a.i.	75.0225	10.3936	podding	LG3@35.7	scanone	20.3253	40.0583	39972153|F|0-28:A>T-28:A>T	3525468|F|0-9:T>G-9:T>G	13911277|F|0-21:T>C-21:T>C	Vfaba.Hedin2.R1.3g022520	Vfaba.Hedin2.R1.3g039840	345
					LG4@222.9	scanone	207.619	226.928	13868541|F|0-44:G>A-44:G>A	3515402|F|0-21:T>G-21:T>G	18320393|F|0-58:A>T-58:A>T	Vfaba.Hedin2.R1.4g224080	Vfaba.Hedin2.R1.4g238200	253
					LG6@110.7	scanone	105.638	113.638	3520483|F|0-33:G>C-33:G>C	13908662|F|0-30:A>G-30:A>G	3519926|F|0-16:T>C-16:T>C	Vfaba.Hedin2.R1.6g117280	Vfaba.Hedin2.R1.6g125160	157
	59 d.a.i.	98.8971	26.9627	podding	none	-	-	-	-	-	-	-	-	-
	73 d.a.i.	99.8003	52.5178	podding	none	-	-	-	-	-	-	-	-	-
	AUDPC, 73 d.a.i.	3602.04	895.75	podding	LG3@35.7		12.3169	37.7112	39982815|F|0-26:G>A-26:G>A	3525468|F|0-9:T>G-9:T>G	3520482|F|0-27:G>T-27:G>T	Vfaba.Hedin2.R1.3g014960	Vfaba.Hedin2.R1.3g037800	476
					LG6@110.7		104.307	113.307	22858221|F|0-40:T>C-40:T>C	13908662|F|0-30:A>G-30:A>G	3518477|F|0-13:C>G-13:C>G	Vfaba.Hedin2.R1.6g115560	Vfaba.Hedin2.R1.6g123520	124

## Sheet: Table_S3
Table S3: Detailed results of QTL-scan for 2021 data derived from F6 against full F2-genotyping data and F2 genotypes with heterozygous calls set to "NA" (missing).
	ANOVAs											Intervals and flanking markers:
	a) AUDPCs, 2021, all F2 genotypes											a) AUDPCs, 2021, all F2 genotypes
	Model formula: y ~ Q1 + Q2
	ANOVA, full model
	term	df	SS	MS	LOD	%var	Pvalue(Chi2)	Pvalue(F)				QTL	markers	LG	position	LOD
	Model	4	7121142	1.78029e+06	9.79653	26.1241	3.76351e-09	6.74652e-09				LG3@28.4	39972153|F|0-28:A>T-28:A>T	LG3	20.3253	3.18385
	Error	144	20137780	139846									3507790|F|0-29:C>T-29:C>T	LG3	28.3891	5.56815
	Total	148	27258923										3518477|F|0-13:C>G-13:C>G	LG3	37.7112	3.54126
												LG6@110.0	3520483|F|0-33:G>C-33:G>C	LG6	105.638	3.92207
	ANOVA (drop one and interactions)												3531569|F|0-5:A>G-5:A>G	LG6	109.987	5.50404
	QTLs	df	Type III SS	LOD	%var	F value	Pvalue(Chi2)	Pvalue(F)					3525493|F|0-20:T>C-20:T>C	LG6	116.976	3.96022
	LG3@28.4	2	3781638	5.568	13.87	13.52	0	4.16e-06	***
	LG6@110.0	2	3734158	5.504	13.7	13.35	0	4.8e-06	***
	LG3@28.4 : LG6@110.0	4	230298	0.3721	0.8449	0.4049	0.788	0.805
	Estimated effects
	term	est	SE	t
	Intercept	2915.09	30.85	94.494
	LG3@28.4a	203.23	42.95	4.732
	LG3@28.4d	-155.59	61.8	-2.518
	LG6@110.0a	220.01	44.35	4.961
	LG6@110.0d	65.86	62.09	1.061
	b) AUDPCs, 2021, heterozygous calls set to missing											b) AUDPCs, 2021, heterozygous calls set to missing
	Model formula: y ~ Q1 + Q2
	ANOVA, full model
	term	df	SS	MS	LOD	%var	Pvalue(Chi2)	Pvalue(F)				QTL	markers	LG	position	LOD
	Model	4	6653946	1.66349e+06	9.05447	24.4102	1.92731e-08	3.29841e-08				LG3@35.7	39982815|F|0-26:G>A-26:G>A	LG3	12.3169	2.96943
	Error	144	20604977	143090									3525468|F|0-9:T>G-9:T>G	LG3	35.7095	4.82765
	Total	148	27258923										3518477|F|0-13:C>G-13:C>G	LG3	37.7112	3.04662
												LG6@110.7	22858221|F|0-40:T>C-40:T>C	LG6	104.307	1.84726
	ANOVA (drop one and interactions)												13908662|F|0-30:A>G-30:A>G	LG6	110.652	4.82526
	QTLs	df	Type III SS	LOD	%var	F value	Pvalue(Chi2)	Pvalue(F)					3520482|F|0-27:G>T-27:G>T	LG6	113.307	3.07444
	LG3@35.7	2	3315614	4.828	12.16	11.59	0	2.16e-05	***
	LG6@110.7	2	3313894	4.825	12.16	11.58	0	2.17e-05	***
	LG3@35.7 : LG6@110.7	4	462269	0.7341	1.696	0.8032	0.496	0.525
	Estimated effects
	term	est	SE	t
	Intercept	1837.55	636.79	2.886
	LG3@35.7a	167.94	36.36	4.619
	LG3@35.7d	-2178.5	927.62	-2.348
	LG6@110.7a	167.08	36	4.642
	LG6@110.7d	-57.28	1084.52	-0.053
	c) score 15 d.a.i., 2021, all F2 genotypes											c) score 15 d.a.i., 2021, all F2 genotypes
	Model formula: y ~ Q1 + Q2
	ANOVA, full model
	term	df	SS	MS	LOD	%var	Pvalue(Chi2)	Pvalue(F)				QTL	markers	LG	position	LOD
	Model	4	98.3626	24.5906	8.4089	22.8868	7.94185e-08	1.30551e-07				LG1@168.9	3528875|F|0-52:G>C-52:G>C	LG1	41.9746	1.44591
	Error	144	331.416	2.3015									32609644|F|0-27:A>G-27:A>G	LG1	168.947	3.08947
	Total	148	429.779										3522233|F|0-21:C>T-21:C>T	LG1	195.572	1.27375
												LG3@27.7	13904923|F|0-61:T>C-61:T>C	LG3	13.6462	2.66624
	ANOVA (drop one and interactions)												39972604|F|0-29:T>C-29:T>C	LG3	27.7246	4.35549
	QTLs	df	Type III SS	LOD	%var	F value	Pvalue(Chi2)	Pvalue(F)					3521346|F|0-18:T>C-18:T>C	LG3	36.0412	2.27396
	LG1@168.9	2	33.21	3.089	7.726	7.214	0.001	0.00103	**
	LG3@27.7	2	47.76	4.355	11.112	10.375	0	6.18e-05	***
	LG1@168.9 : LG3@27.7	4	6.447	0.6356	1.5	0.6944	0.57	0.597
	Estimated effects
	term	est	SE	t
	Intercept	5.8756	0.127	46.254
	LG1@168.9a	-0.4753	0.1712	-2.777
	LG1@168.9d	-0.5955	0.2544	-2.341
	LG3@27.7a	0.7414	0.1841	4.026
	LG3@27.7d	-0.6645	0.254	-2.616
	d) score 15 d.a.i., 2021, heterozygous calls set to missing											d) score 15 d.a.i., 2021, heterozygous calls set to missing
	Model formula: y ~ Q1
	ANOVA, full model
	term	df	SS	MS	LOD	%var	Pvalue(Chi2)	Pvalue(F)				QTL	markers	LG	position	LOD
	Model	2	87.5522	43.7761	7.37038	20.3715	4.2621e-08	5.99819e-08				LG3@27.7	3516204|F|0-21:C>G-21:C>G	LG3	24.0313	5.43037
	Error	146	342.227	2.34402									39972604|F|0-29:T>C-29:T>C	LG3	27.7246	7.37038
	Total	148	429.779										3518477|F|0-13:C>G-13:C>G	LG3	37.7112	5.41791
	Estimated effects
	term	est	SE	t
	Intercept	1.5148	1.9753	0.767
	LG3@27.7a	0.8982	0.1484	6.052
	LG3@27.7d	-9.2415	4.0743	-2.268
	e) score 32 d.a.i., 2021, all F2 genotypes											e) score 32 d.a.i., 2021, all F2 genotypes
	Model formula: y ~ Q1 + Q2
	ANOVA, full model
	term	df	SS	MS	LOD	%var	Pvalue(Chi2)	Pvalue(F)				QTL	markers	LG	position	LOD
	Model	4	613.28	153.32	9.31696	25.0209	1.08223e-08	1.88274e-08				LG2@84.5	3524309|F|0-62:T>C-62:T>C	LG2	55.4046	1.64585
	Error	144	1837.79	12.7624									13913141|F|0-43:A>G-43:A>G	LG2	84.4673	3.6753
	Total	148	2451.07										3521247|F|0-15:G>A-15:G>A	LG2	90.4744	1.89564
												LG6@121.0	3522080|F|0-31:C>T-31:C>T	LG6	119.306	3.3856
	ANOVA (drop one and interactions)												3523962|F|0-42:G>T-42:G>T	LG6	120.967	5.33122
	QTLs	df	Type III SS	LOD	%var	F value	Pvalue(Chi2)	Pvalue(F)					13912947|F|0-5:A>G-5:A>G	LG6	149.942	3.70568
	LG2@84.5	2	221.1	3.675	9.02	8.661	0	0.000281	***
	LG6@121.0	2	329.2	5.331	13.43	12.897	0	7.04e-06	***
	LG2@84.5 : LG6@121.0	4	31.08	0.5518	1.268	0.6021	0.637	0.662
	Estimated effects
	term	est	SE	t
	Intercept	16.9895	0.2939	57.814
	LG2@84.5a	1.6257	0.407	3.994
	LG2@84.5d	-0.7255	0.5962	-1.217
	LG6@121.0a	1.8065	0.4074	4.434
	LG6@121.0d	-1.4284	0.5903	-2.42
	f) score 32 d.a.i., 2021, heterozygous calls set to missing											f) score 32 d.a.i., 2021, heterozygous calls set to missing
	Model formula: y ~ Q1 + Q2 + Q3
	ANOVA, full model
	term	df	SS	MS	LOD	%var	Pvalue(Chi2)	Pvalue(F)				QTL	markers	LG	position	LOD
	Model	6	764.97	127.495	12.1042	31.2096	3.28268e-10	7.9293e-10				LG1@48.3	13865537|F|0-8:G>C-8:G>C	LG1	44.6404	3.4935
	Error	142	1686.1	11.874									3521794|F|0-50:G>A-50:G>A	LG1	48.3003	5.06988
	Total	148	2451.07										3526846|F|0-47:T>C-47:T>C	LG1	64.0859	3.38578
												LG3@16.0	3528322|F|0-12:C>T-12:C>T	LG3	5.3203	2.43743
	ANOVA (drop one and interactions)												3509962|F|0-15:A>G-15:A>G	LG3	15.98	4.02861
	QTLs	df	Type III SS	LOD	%var	F value	Pvalue(Chi2)	Pvalue(F)					3521346|F|0-18:T>C-18:T>C	LG3	36.0412	1.70964
	LG1@48.3	2	286	5.07	11.67	12.044	0	1.47e-05	***			LG6@120.3	3516700|F|0-8:C>T-8:C>T	LG6	106.301	2.5209
	LG3@16.0	2	223.6	4.029	9.121	9.414	0	0.000145	***				32612055|F|0-32:T>C-32:T>C	LG6	120.302	4.21566
	LG6@120.3	2	234.6	4.216	9.573	9.881	0	9.6e-05	***				32613291|F|0-44:C>G-44:C>G	LG6	124.968	2.19265
	LG1@48.3:LG3@16.0	4	10.84	0.2087	0.4423	0.2233	0.916	0.925
	LG1@48.3:LG6@120.3	4	39.87	0.7743	1.6267	0.8356	0.468	0.505
	LG3@16.0:LG6@120.3	4	50.08	0.9755	2.0431	1.056	0.343	0.381
	Estimated effects
	term	est	SE	t
	Intercept	-14.0011	7.6503	-1.83
	LG1@48.3a	1.6475	0.3368	4.892
	LG1@48.3d	-11.9651	7.338	-1.631
	LG3@16.0a	1.1259	0.3373	3.338
	LG3@16.0d	-37.9692	11.3944	-3.332
	LG6@120.3a	1.4912	0.3365	4.431
	LG6@120.3d	-13.7841	10.5503	-1.307
	g) score 44 d.a.i., 2021, all F2 genotypes											g) score 44 d.a.i., 2021, all F2 genotypes
	Model formula: y ~ Q1 + Q2
	ANOVA, full model
	term	df	SS	MS	LOD	%var	Pvalue(Chi2)	Pvalue(F)				QTL	markers	LG	position	LOD
	Model	4	8143.38	2035.85	9.19228	24.7314	1.42365e-08	2.4575e-08				LG3@24.7	39972153|F|0-28:A>T-28:A>T	LG3	20.3253	3.24801
	Error	144	24783.9	172.11									3532209|F|0-64:A>T-64:A>T	LG3	24.6957	5.11928
	Total	148	32927.3										3518477|F|0-13:C>G-13:C>G	LG3	37.7112	3.26745
												LG6@110.0	3516700|F|0-8:C>T-8:C>T	LG6	106.301	3.92833
	ANOVA (drop one and interactions)												3531569|F|0-5:A>G-5:A>G	LG6	109.987	5.80135
	QTLs	df	Type III SS	LOD	%var	F value	Pvalue(Chi2)	Pvalue(F)					13868881|F|0-21:T>C-21:T>C	LG6	117.641	3.98272
	LG3@24.7	2	4249	5.119	12.9	12.34	0	1.13e-05	***
	LG6@110.0	2	4867	5.801	14.78	14.14	0	2.47e-06	***
	LG3@24.7 : LG6@110.0	4	321.1	0.422	0.9753	0.4595	0.746	0.765
	Estimated effects
	term	est	SE	t
	Intercept	49.309	1.089	45.261
	LG3@24.7a	6.684	1.493	4.477
	LG3@24.7d	-5.682	2.227	-2.551
	LG6@110.0a	8.044	1.563	5.146
	LG6@110.0d	2.117	2.181	0.971
	h) score 44 d.a.i., 2021, heterozygous calls set to missing											h) score 44 d.a.i., 2021, heterozygous calls set to missing
	Model formula: y ~ Q1 + Q2 + Q3
	ANOVA, full model
	term	df	SS	MS	LOD	%var	Pvalue(Chi2)	Pvalue(F)				QTL	markers	LG	position	LOD
	Model	6	10893	1815.5	12.9971	33.0821	4.81973e-11	1.24945e-10				LG3@35.7	39972153|F|0-28:A>T-28:A>T	LG3	20.3253	1.78279
	Error	142	22034.2	155.171									3525468|F|0-9:T>G-9:T>G	LG3	35.7095	4.26766
	Total	148	32927.3										13911277|F|0-21:T>C-21:T>C	LG3	40.0583	1.6296
												LG4@222.9	13868541|F|0-44:G>A-44:G>A	LG4	207.619	2.49645
	ANOVA (drop one and interactions)												3515402|F|0-21:T>G-21:T>G	LG4	222.919	4.12469
	QTLs	df	Type III SS	LOD	%var	F value	Pvalue(Chi2)	Pvalue(F)					18320393|F|0-58:A>T-58:A>T	LG4	226.928	2.81294
	LG3@35.7	2	3107	4.268	9.436	10.012	0	8.56e-05	***			LG6@110.7	3520483|F|0-33:G>C-33:G>C	LG6	105.638	3.12204
	LG4@222.9	2	2995	4.124	9.097	9.652	0	0.000117	***				13908662|F|0-30:A>G-30:A>G	LG6	110.652	5.24503
	LG6@110.7	2	3877	5.245	11.776	12.494	0	1e-05	***				3519926|F|0-16:T>C-16:T>C	LG6	113.638	3.49202
	LG3@35.7:LG4@222.9	4	680.2	1.0145	2.0657	1.0989	0.323	0.359
	LG3@35.7:LG6@110.7	4	240.8	0.3555	0.7313	0.3812	0.802	0.822
	LG4@222.9:LG6@110.7	4	386.4	0.5725	1.1736	0.6159	0.62	0.652
	Estimated effects
	term	est	SE	t																chr pos lod
	Intercept	13.047	21.723	0.601
	LG3@35.7a	5.156	1.212	4.256
	LG3@35.7d	-68.415	31.888	-2.145
	LG4@222.9a	4.801	1.128	4.256
	LG4@222.9d	9.743	19.502	0.5															chr pos lod
	LG6@110.7a	5.83	1.187	4.913
	LG6@110.7d	-16.087	35.762	-0.45
																			chr pos lod

## Sheet: Table_S4
Table S4: GO-enrichment for QTLs and differential expression analysis of NV640 and NV293 reads analysed in DESeq2 mapped to V. faba "Hedin" assembly GCA_948472305.1 (Jayakodi et al., 2023), analysed in AgriGO v.2.0 (Tian et al. 2017). QTL-intervals overlapping for most of their range were evaluated together as a single region.
QTL(s)	GO_acc	term_type	Term	queryitem	querytotal	refitem	reftotal	pvalue	FDR
LG1@168.9	GO:0008643	P	carbohydrate transport	14	1533	52	21745	1.1e-05	0.016
	GO:0015749	P	monosaccharide transport	12	1533	38	21745	7.4e-06	0.016
	GO:0052861	F	glucan endo-1,3-beta-glucanase activity, C-3 substituted reducing group	9	1533	10	21745	4.1e-10	2.9e-07
	GO:0052736	F	beta-glucanase activity	9	1533	10	21745	4.1e-10	2.9e-07
	GO:1901476	F	carbohydrate transporter activity	16	1533	61	21745	3.7e-06	0.0013
	GO:0015144	F	carbohydrate transmembrane transporter activity	16	1533	61	21745	3.7e-06	0.0013
	GO:0015145	F	monosaccharide transmembrane transporter activity	12	1533	38	21745	7.4e-06	0.0021
	GO:0051119	F	sugar transmembrane transporter activity	14	1533	52	21745	1.1e-05	0.0024
	GO:0070042	F	rRNA (uridine-N3-)-methyltransferase activity	5	1533	8	21745	8.2e-05	0.014
	GO:0016436	F	rRNA (uridine) methyltransferase activity	5	1533	8	21745	8.2e-05	0.014
	GO:0008173	F	RNA methyltransferase activity	12	1533	48	21745	9.8e-05	0.015
	GO:0061135	F	endopeptidase regulator activity	14	1533	66	21745	0.00018	0.021
	GO:0004866	F	endopeptidase inhibitor activity	14	1533	66	21745	0.00018	0.021
	GO:0030414	F	peptidase inhibitor activity	14	1533	66	21745	0.00018	0.021
	GO:0061134	F	peptidase regulator activity	14	1533	68	21745	0.00025	0.027
	GO:0043596	C	nuclear replication fork	5	1533	8	21745	8.2e-05	0.011
	GO:0030894	C	replisome	5	1533	8	21745	8.2e-05	0.011
	GO:0043601	C	nuclear replisome	5	1533	8	21745	8.2e-05	0.011
LG2@10.7	GO:0071985	P	multivesicular body sorting pathway	7	511	9	21745	1.4e-10	1.6e-07
	GO:0006368	P	transcription elongation from RNA polymerase II promoter	7	511	12	21745	3e-09	1.3e-06
	GO:0010073	P	meristem maintenance	9	511	25	21745	3.4e-09	1.3e-06
	GO:0048507	P	meristem development	9	511	27	21745	7.5e-09	2.1e-06
	GO:0006354	P	DNA-templated transcription, elongation	7	511	16	21745	4e-08	8.7e-06
	GO:0006952	P	defense response	30	511	421	21745	1.9e-07	3.5e-05
	GO:0009888	P	tissue development	9	511	78	21745	9.8e-05	0.015
	GO:0043531	F	ADP binding	30	511	201	21745	2.5e-15	1.2e-12
	GO:0004497	F	monooxygenase activity	20	511	341	21745	0.00025	0.05
	GO:0030554	F	adenyl nucleotide binding	100	511	2879	21745	0.00031	0.05
	GO:0000814	C	ESCRT II complex	7	511	10	21745	4.7e-10	1.1e-07
	GO:0010008	C	endosome membrane	7	511	12	21745	3e-09	2.2e-07
	GO:0036452	C	ESCRT complex	7	511	12	21745	3e-09	2.2e-07
	GO:0044440	C	endosomal part	7	511	19	21745	1.6e-07	7.4e-06
	GO:0005768	C	endosome	7	511	19	21745	1.6e-07	7.4e-06
	GO:0005774	C	vacuolar membrane	7	511	20	21745	2.5e-07	9.2e-06
	GO:0005773	C	vacuole	7	511	27	21745	2.4e-06	6.8e-05
	GO:0044437	C	vacuolar part	7	511	27	21745	2.4e-06	6.8e-05
LG2@50.1	GO:0004497	F	monooxygenase activity	9	88	341	21745	1.9e-05	0.0042
	GO:0016705	F	oxidoreductase activity, acting on paired donors, with incorporation or reduction of molecular oxygen	9	88	374	21745	4e-05	0.0042
	GO:0005506	F	iron ion binding	9	88	400	21745	6.6e-05	0.0047
	GO:1901363	F	heterocyclic compound binding	54	88	7175	21745	0.00032	0.012
	GO:0020037	F	heme binding	9	88	492	21745	0.0003	0.012
	GO:0097159	F	organic cyclic compound binding	54	88	7178	21745	0.00033	0.012
	GO:0046906	F	tetrapyrrole binding	9	88	517	21745	0.00043	0.013
	GO:0043167	F	ion binding	22	88	2279	21745	0.00059	0.016
	GO:0043169	F	cation binding	20	88	2125	21745	0.0013	0.03
	GO:0043531	F	ADP binding	5	88	201	21745	0.0017	0.036
	GO:0046872	F	metal ion binding	19	88	2074	21745	0.0021	0.041
LG2@68.4	GO:0045944	P	positive regulation of transcription from RNA polymerase II promoter	10	132	81	21745	1.3e-10	5.9e-08
	GO:0010604	P	positive regulation of macromolecule metabolic process	11	132	138	21745	1.8e-09	1.2e-07
	GO:0009893	P	positive regulation of metabolic process	11	132	141	21745	2.2e-09	1.2e-07
	GO:0009891	P	positive regulation of biosynthetic process	10	132	113	21745	3.4e-09	1.2e-07
	GO:0010557	P	positive regulation of macromolecule biosynthetic process	10	132	113	21745	3.4e-09	1.2e-07
	GO:1903508	P	positive regulation of nucleic acid-templated transcription	10	132	107	21745	2e-09	1.2e-07
	GO:0045893	P	positive regulation of transcription, DNA-templated	10	132	107	21745	2e-09	1.2e-07
	GO:0051254	P	positive regulation of RNA metabolic process	10	132	107	21745	2e-09	1.2e-07
	GO:1902680	P	positive regulation of RNA biosynthetic process	10	132	107	21745	2e-09	1.2e-07
	GO:0010628	P	positive regulation of gene expression	10	132	113	21745	3.4e-09	1.2e-07
	GO:0031328	P	positive regulation of cellular biosynthetic process	10	132	113	21745	3.4e-09	1.2e-07
	GO:0031325	P	positive regulation of cellular metabolic process	11	132	138	21745	1.8e-09	1.2e-07
	GO:0045935	P	positive regulation of nucleobase-containing compound metabolic process	10	132	113	21745	3.4e-09	1.2e-07
	GO:0051173	P	positive regulation of nitrogen compound metabolic process	10	132	119	21745	5.6e-09	1.9e-07
	GO:0048522	P	positive regulation of cellular process	11	132	162	21745	9.6e-09	3e-07
	GO:0006357	P	regulation of transcription from RNA polymerase II promoter	10	132	150	21745	5.2e-08	1.5e-06
	GO:0048518	P	positive regulation of biological process	11	132	196	21745	6.8e-08	1.9e-06
	GO:0006366	P	transcription from RNA polymerase II promoter	10	132	185	21745	3.6e-07	9.5e-06
	GO:2001141	P	regulation of RNA biosynthetic process	18	132	1305	21745	0.0021	0.047
	GO:0006355	P	regulation of transcription, DNA-templated	18	132	1305	21745	0.0021	0.047
	GO:1903506	P	regulation of nucleic acid-templated transcription	18	132	1305	21745	0.0021	0.047
	GO:0080090	P	regulation of primary metabolic process	19	132	1426	21745	0.0024	0.048
	GO:0051252	P	regulation of RNA metabolic process	18	132	1316	21745	0.0023	0.048
	GO:0009889	P	regulation of biosynthetic process	18	132	1357	21745	0.0031	0.05
	GO:0031326	P	regulation of cellular biosynthetic process	18	132	1357	21745	0.0031	0.05
	GO:0031323	P	regulation of cellular metabolic process	19	132	1444	21745	0.0027	0.05
	GO:2000112	P	regulation of cellular macromolecule biosynthetic process	18	132	1354	21745	0.003	0.05
	GO:0010556	P	regulation of macromolecule biosynthetic process	18	132	1354	21745	0.003	0.05
	GO:0019219	P	regulation of nucleobase-containing compound metabolic process	18	132	1349	21745	0.0029	0.05
	GO:0001159	F	core promoter proximal region DNA binding	10	132	22	21745	6.1e-17	7.7e-15
	GO:0000987	F	core promoter proximal region sequence-specific DNA binding	10	132	22	21745	6.1e-17	7.7e-15
	GO:0001067	F	regulatory region nucleic acid binding	13	132	88	21745	2.2e-14	9.3e-13
	GO:0044212	F	transcription regulatory region DNA binding	13	132	88	21745	2.2e-14	9.3e-13
	GO:0000975	F	regulatory region DNA binding	13	132	88	21745	2.2e-14	9.3e-13
	GO:0000976	F	transcription regulatory region sequence-specific DNA binding	13	132	88	21745	2.2e-14	9.3e-13
	GO:1990837	F	sequence-specific double-stranded DNA binding	13	132	151	21745	2.5e-11	9e-10
	GO:0000981	F	RNA polymerase II transcription factor activity, sequence-specific DNA binding	10	132	83	21745	1.6e-10	5.1e-09
	GO:0003690	F	double-stranded DNA binding	13	132	235	21745	5.7e-09	1.6e-07
	GO:0043565	F	sequence-specific DNA binding	13	132	404	21745	2.7e-06	6.8e-05
	GO:0004497	F	monooxygenase activity	8	132	341	21745	0.0015	0.035
	GO:0046983	F	protein dimerization activity	11	132	608	21745	0.0019	0.039
LG2@84.5	GO:0045944	P	positive regulation of transcription from RNA polymerase II promoter	10	426	81	21745	4.8e-06	0.005
	GO:0009893	P	positive regulation of metabolic process	12	426	141	21745	2.8e-05	0.0071
	GO:0009891	P	positive regulation of biosynthetic process	10	426	113	21745	9e-05	0.0071
	GO:0010557	P	positive regulation of macromolecule biosynthetic process	10	426	113	21745	9e-05	0.0071
	GO:1903508	P	positive regulation of nucleic acid-templated transcription	10	426	107	21745	5.7e-05	0.0071
	GO:0045893	P	positive regulation of transcription, DNA-templated	10	426	107	21745	5.7e-05	0.0071
	GO:0051254	P	positive regulation of RNA metabolic process	10	426	107	21745	5.7e-05	0.0071
	GO:1902680	P	positive regulation of RNA biosynthetic process	10	426	107	21745	5.7e-05	0.0071
	GO:0010628	P	positive regulation of gene expression	10	426	113	21745	9e-05	0.0071
	GO:0031328	P	positive regulation of cellular biosynthetic process	10	426	113	21745	9e-05	0.0071
	GO:0031325	P	positive regulation of cellular metabolic process	12	426	138	21745	2.2e-05	0.0071
	GO:0010604	P	positive regulation of macromolecule metabolic process	12	426	138	21745	2.2e-05	0.0071
	GO:0045935	P	positive regulation of nucleobase-containing compound metabolic process	10	426	113	21745	9e-05	0.0071
	GO:0048522	P	positive regulation of cellular process	12	426	162	21745	0.00011	0.0078
	GO:0051173	P	positive regulation of nitrogen compound metabolic process	10	426	119	21745	0.00014	0.0094
	GO:0048518	P	positive regulation of biological process	13	426	196	21745	0.00017	0.01
	GO:0043085	P	positive regulation of catalytic activity	5	426	27	21745	0.00017	0.01
	GO:0006357	P	regulation of transcription from RNA polymerase II promoter	11	426	150	21745	0.00022	0.012
	GO:0044093	P	positive regulation of molecular function	5	426	31	21745	0.00033	0.018
	GO:1901605	P	alpha-amino acid metabolic process	10	426	136	21745	0.00041	0.021
	GO:0015749	P	monosaccharide transport	5	426	38	21745	0.00087	0.042
	GO:0001159	F	core promoter proximal region DNA binding	10	426	22	21745	4.9e-12	1.5e-09
	GO:0000987	F	core promoter proximal region sequence-specific DNA binding	10	426	22	21745	4.9e-12	1.5e-09
	GO:0044212	F	transcription regulatory region DNA binding	13	426	88	21745	2.2e-08	2.3e-06
	GO:0001067	F	regulatory region nucleic acid binding	13	426	88	21745	2.2e-08	2.3e-06
	GO:0000976	F	transcription regulatory region sequence-specific DNA binding	13	426	88	21745	2.2e-08	2.3e-06
	GO:0000975	F	regulatory region DNA binding	13	426	88	21745	2.2e-08	2.3e-06
	GO:1990837	F	sequence-specific double-stranded DNA binding	14	426	151	21745	2.3e-06	0.0002
	GO:0000981	F	RNA polymerase II transcription factor activity, sequence-specific DNA binding	10	426	83	21745	6e-06	0.00046
	GO:0015299	F	solute:proton antiporter activity	8	426	59	21745	2.1e-05	0.0013
	GO:0015298	F	solute:cation antiporter activity	8	426	59	21745	2.1e-05	0.0013
	GO:0003690	F	double-stranded DNA binding	14	426	235	21745	0.0003	0.016
	GO:0015145	F	monosaccharide transmembrane transporter activity	5	426	38	21745	0.00087	0.044
LG2@102.1	GO:0000427	C	plastid-encoded plastid RNA polymerase complex	5	1307	6	21745	4.5e-06	0.0017
LG2@169.8, LG2@171.4	GO:0015211	F	purine nucleoside transmembrane transporter activity	5	264	24	21745	9.7e-06	0.0038
	GO:0005337	F	nucleoside transmembrane transporter activity	5	264	32	21745	4.2e-05	0.0083
	GO:1901505	F	carbohydrate derivative transporter activity	5	264	37	21745	8.7e-05	0.0085
	GO:0015932	F	nucleobase-containing compound transmembrane transporter activity	5	264	37	21745	8.7e-05	0.0085
	GO:0008233	F	peptidase activity	22	264	727	21745	0.00017	0.013
	GO:0015297	F	antiporter activity	8	264	139	21745	0.00036	0.023
	GO:0070011	F	peptidase activity, acting on L-amino acid peptides	20	264	705	21745	0.0007	0.039
LG3@24.7, LG3@27.7, LG3@28.4	GO:0034062	F	RNA polymerase activity	10	330	154	21745	0.00015	0.033
	GO:0003899	F	DNA-directed RNA polymerase activity	10	330	148	21745	0.00011	0.033
	GO:0015935	C	small ribosomal subunit	7	330	75	21745	0.00016	0.015
LG3@75.2ab	GO:0010088	P	phloem development	10	959	14	21745	2.5e-11	4.6e-08
	GO:0010087	P	phloem or xylem histogenesis	10	959	19	21745	1.9e-09	1.7e-06
	GO:0006488	P	dolichol-linked oligosaccharide biosynthetic process	7	959	14	21745	8.7e-07	0.0004
	GO:0006490	P	oligosaccharide-lipid intermediate biosynthetic process	7	959	14	21745	8.7e-07	0.0004
	GO:0099022	P	vesicle tethering	6	959	10	21745	1.4e-06	0.00042
	GO:0090522	P	vesicle tethering involved in exocytosis	6	959	10	21745	1.4e-06	0.00042
	GO:0009617	P	response to bacterium	6	959	11	21745	2.9e-06	0.00067
	GO:0042742	P	defense response to bacterium	6	959	11	21745	2.9e-06	0.00067
	GO:0006903	P	vesicle targeting	6	959	14	21745	1.7e-05	0.0028
	GO:0051650	P	establishment of vesicle localization	6	959	14	21745	1.7e-05	0.0028
	GO:0051648	P	vesicle localization	6	959	14	21745	1.7e-05	0.0028
	GO:0051656	P	establishment of organelle localization	6	959	16	21745	4.1e-05	0.0059
	GO:0051640	P	organelle localization	6	959	16	21745	4.1e-05	0.0059
	GO:0007005	P	mitochondrion organization	8	959	33	21745	7.6e-05	0.01
	GO:0009723	P	response to ethylene	10	959	57	21745	0.00019	0.023
	GO:0031975	C	envelope	15	959	117	21745	0.00022	0.025
	GO:0031967	C	organelle envelope	15	959	117	21745	0.00022	0.025
LG3@115.2, LG3@119.2	GO:0010088	P	phloem development	10	940	14	21745	2.1e-11	3.8e-08
	GO:0010087	P	phloem or xylem histogenesis	10	940	19	21745	1.5e-09	1.4e-06
	GO:0006488	P	dolichol-linked oligosaccharide biosynthetic process	7	940	14	21745	7.6e-07	0.00035
	GO:0006490	P	oligosaccharide-lipid intermediate biosynthetic process	7	940	14	21745	7.6e-07	0.00035
	GO:0099022	P	vesicle tethering	6	940	10	21745	1.2e-06	0.00037
	GO:0090522	P	vesicle tethering involved in exocytosis	6	940	10	21745	1.2e-06	0.00037
	GO:0009617	P	response to bacterium	6	940	11	21745	2.5e-06	0.00059
	GO:0042742	P	defense response to bacterium	6	940	11	21745	2.5e-06	0.00059
	GO:0006903	P	vesicle targeting	6	940	14	21745	1.5e-05	0.0025
	GO:0051650	P	establishment of vesicle localization	6	940	14	21745	1.5e-05	0.0025
	GO:0051648	P	vesicle localization	6	940	14	21745	1.5e-05	0.0025
	GO:0051656	P	establishment of organelle localization	6	940	16	21745	3.7e-05	0.0052
	GO:0051640	P	organelle localization	6	940	16	21745	3.7e-05	0.0052
	GO:0007005	P	mitochondrion organization	8	940	33	21745	6.6e-05	0.0087
	GO:0031975	C	envelope	15	940	117	21745	0.00018	0.02
	GO:0031967	C	organelle envelope	15	940	117	21745	0.00018	0.02
LG3@136.5, LG3@144.5	-	-	-	-	-	-	-	-	-
LG4@135.3	GO:0004497	F	monooxygenase activity	8	58	341	21745	7.8e-06	0.0011
	GO:0016705	F	oxidoreductase activity, acting on paired donors, with incorporation or reduction of molecular oxygen	8	58	374	21745	1.5e-05	0.0011
	GO:0005506	F	iron ion binding	8	58	400	21745	2.4e-05	0.0012
	GO:0020037	F	heme binding	8	58	492	21745	0.0001	0.0037
	GO:0046906	F	tetrapyrrole binding	8	58	517	21745	0.00014	0.0041
LG5@79.6, LG5@86.9, LG5@93.9, LG5@107.3	GO:0010876	P	lipid localization	11	647	85	21745	4.8e-05	0.015
	GO:0015918	P	sterol transport	5	647	14	21745	3.8e-05	0.015
	GO:0015850	P	organic hydroxy compound transport	5	647	14	21745	3.8e-05	0.015
	GO:0032365	P	intracellular lipid transport	5	647	15	21745	5.6e-05	0.015
	GO:0032366	P	intracellular sterol transport	5	647	13	21745	2.5e-05	0.015
	GO:0006771	P	riboflavin metabolic process	6	647	32	21745	0.00033	0.032
	GO:0006855	P	drug transmembrane transport	7	647	45	21745	0.00036	0.032
	GO:1990961	P	drug transmembrane export	7	647	45	21745	0.00036	0.032
	GO:0006869	P	lipid transport	10	647	81	21745	0.00016	0.032
	GO:0042727	P	flavin-containing compound biosynthetic process	6	647	32	21745	0.00033	0.032
	GO:0042726	P	flavin-containing compound metabolic process	6	647	32	21745	0.00033	0.032
	GO:0042493	P	response to drug	7	647	45	21745	0.00036	0.032
	GO:0009231	P	riboflavin biosynthetic process	6	647	32	21745	0.00033	0.032
	GO:0046618	P	drug export	7	647	45	21745	0.00036	0.032
	GO:0015893	P	drug transport	7	647	45	21745	0.00036	0.032
	GO:0008703	F	5-amino-6-(5-phosphoribosylamino)uracil reductase activity	5	647	6	21745	1.4e-07	9.1e-05
LG6@110.0ab	GO:0016757	F	transferase activity, transferring glycosyl groups	12	127	580	21745	0.00028	0.032
	GO:0008194	F	UDP-glycosyltransferase activity	9	127	318	21745	0.00016	0.032
LG6@121.0	GO:0016567	P	protein ubiquitination	12	355	163	21745	2.1e-05	0.016
	GO:0032446	P	protein modification by small protein conjugation	12	355	183	21745	6.3e-05	0.017
	GO:0070647	P	protein modification by small protein conjugation or removal	14	355	242	21745	6.5e-05	0.017
LG6@169.6	-	-	-	-	-	-	-	-	-
differentially expressed genes between NV640 and NV293 in response to infection	GO:0006082	P	organic acid metabolic process	36	400	603	21745	3.2e-09	3.6e-06
	GO:0044281	P	small molecule metabolic process	45	400	1068	21745	1.1e-06	0.00062
	GO:0043436	P	oxoacid metabolic process	27	400	521	21745	3.4e-06	0.00075
	GO:0044710	P	single-organism metabolic process	71	400	2051	21745	2.5e-06	0.00075
	GO:0019752	P	carboxylic acid metabolic process	27	400	519	21745	3.2e-06	0.00075
	GO:0032787	P	monocarboxylic acid metabolic process	16	400	232	21745	9.8e-06	0.0015
	GO:0044272	P	sulfur compound biosynthetic process	6	400	27	21745	8.6e-06	0.0015
	GO:0006099	P	tricarboxylic acid cycle	6	400	35	21745	4.2e-05	0.0043
	GO:0006090	P	pyruvate metabolic process	8	400	69	21745	4.3e-05	0.0043
	GO:0044763	P	single-organism cellular process	90	400	3010	21745	3.9e-05	0.0043
	GO:0006790	P	sulfur compound metabolic process	11	400	130	21745	3.5e-05	0.0043
	GO:0044699	P	single-organism process	110	400	3862	21745	5e-05	0.0046
	GO:0006732	P	coenzyme metabolic process	13	400	190	21745	6.8e-05	0.0058
	GO:0055114	P	oxidation-reduction process	15	400	246	21745	7.4e-05	0.0058
	GO:0051186	P	cofactor metabolic process	15	400	249	21745	8.4e-05	0.0062
	GO:0009060	P	aerobic respiration	6	400	40	21745	9.1e-05	0.0063
	GO:0031090	C	organelle membrane	12	400	175	21745	0.00012	0.017
	GO:0098588	C	bounding membrane of organelle	9	400	114	21745	0.0003	0.02
NV640 (R), differentially expressed genes between inoculated and control	GO:0009738	P	abscisic acid-activated signaling pathway	25	3239	52	21745	1.7e-08	1.9e-05
	GO:0097306	P	cellular response to alcohol	25	3239	52	21745	1.7e-08	1.9e-05
	GO:0071215	P	cellular response to abscisic acid stimulus	25	3239	52	21745	1.7e-08	1.9e-05
	GO:0071229	P	cellular response to acid chemical	29	3239	65	21745	1.1e-08	1.9e-05
	GO:0006099	P	tricarboxylic acid cycle	19	3239	35	21745	7.2e-08	6.7e-05
	GO:1901701	P	cellular response to oxygen-containing compound	34	3239	91	21745	1.3e-07	0.0001
	GO:0071396	P	cellular response to lipid	28	3239	71	21745	4.5e-07	0.0003
	GO:0016310	P	phosphorylation	295	3239	1496	21745	6.8e-07	0.0004
	GO:0006082	P	organic acid metabolic process	135	3239	603	21745	9.7e-07	0.0005
	GO:0009060	P	aerobic respiration	19	3239	40	21745	1.1e-06	0.0005
	GO:0006790	P	sulfur compound metabolic process	41	3239	130	21745	1.5e-06	0.00062
	GO:0009737	P	response to abscisic acid	27	3239	72	21745	2.3e-06	0.00081
	GO:0097305	P	response to alcohol	27	3239	72	21745	2.3e-06	0.00081
	GO:0006749	P	glutathione metabolic process	22	3239	53	21745	2.7e-06	0.0009
	GO:0006793	P	phosphorus metabolic process	369	3239	1956	21745	2.9e-06	0.00091
	GO:0006468	P	protein phosphorylation	267	3239	1368	21745	4.4e-06	0.0012
	GO:0006796	P	phosphate-containing compound metabolic process	366	3239	1948	21745	4.6e-06	0.0012
	GO:0036211	P	protein modification process	371	3239	1984	21745	6.1e-06	0.0016
	GO:0006464	P	cellular protein modification process	369	3239	1975	21745	6.9e-06	0.0016
	GO:0001101	P	response to acid chemical	32	3239	97	21745	6.9e-06	0.0016
	GO:1901700	P	response to oxygen-containing compound	38	3239	126	21745	1.1e-05	0.0024
	GO:0043412	P	macromolecule modification	396	3239	2157	21745	1.7e-05	0.0034
	GO:0033993	P	response to lipid	30	3239	92	21745	1.7e-05	0.0034
	GO:0051704	P	multi-organism process	45	3239	163	21745	2.3e-05	0.0043
	GO:0071310	P	cellular response to organic substance	54	3239	207	21745	2.3e-05	0.0043
	GO:0006575	P	cellular modified amino acid metabolic process	26	3239	78	21745	3.9e-05	0.0069
	GO:0070887	P	cellular response to chemical stimulus	57	3239	227	21745	4.4e-05	0.0074
	GO:0032870	P	cellular response to hormone stimulus	50	3239	192	21745	4.6e-05	0.0074
	GO:0009755	P	hormone-mediated signaling pathway	50	3239	192	21745	4.6e-05	0.0074
	GO:0051186	P	cofactor metabolic process	61	3239	249	21745	5.4e-05	0.008
	GO:0071495	P	cellular response to endogenous stimulus	50	3239	193	21745	5.3e-05	0.008
	GO:1901565	P	organonitrogen compound catabolic process	22	3239	64	21745	8.8e-05	0.013
	GO:0006559	P	L-phenylalanine catabolic process	7	3239	10	21745	0.00013	0.018
	GO:0006732	P	coenzyme metabolic process	48	3239	190	21745	0.00014	0.019
	GO:0016054	P	organic acid catabolic process	15	3239	37	21745	0.00014	0.019
	GO:0006558	P	L-phenylalanine metabolic process	9	3239	16	21745	0.00015	0.02
	GO:0044706	P	multi-multicellular organism process	22	3239	67	21745	0.00019	0.023
	GO:0009856	P	pollination	22	3239	67	21745	0.00019	0.023
	GO:0046395	P	carboxylic acid catabolic process	13	3239	31	21745	0.00026	0.03
	GO:0071369	P	cellular response to ethylene stimulus	18	3239	51	21745	0.00026	0.03
	GO:0009873	P	ethylene-activated signaling pathway	18	3239	51	21745	0.00026	0.03
	GO:0042221	P	response to chemical	95	3239	451	21745	0.00032	0.035
	GO:0015748	P	organophosphate ester transport	15	3239	40	21745	0.00039	0.042
	GO:0009723	P	response to ethylene	19	3239	57	21745	0.00041	0.043
	GO:0044763	P	single-organism cellular process	520	3239	3010	21745	0.00042	0.043
	GO:0007154	P	cell communication	127	3239	637	21745	0.00043	0.043
	GO:0008037	P	cell recognition	20	3239	62	21745	0.00047	0.046
	GO:0048544	P	recognition of pollen	20	3239	62	21745	0.00047	0.046
	GO:0019752	P	carboxylic acid metabolic process	106	3239	519	21745	0.00049	0.047
	GO:0010427	F	abscisic acid binding	22	3239	28	21745	1e-13	2.2e-10
	GO:0042562	F	hormone binding	22	3239	29	21745	3.6e-13	3.9e-10
	GO:0019212	F	phosphatase inhibitor activity	22	3239	32	21745	9.4e-12	5.1e-09
	GO:0004864	F	protein phosphatase inhibitor activity	22	3239	32	21745	9.4e-12	5.1e-09
	GO:0033293	F	monocarboxylic acid binding	23	3239	36	21745	3.2e-11	1.4e-08
	GO:0016491	F	oxidoreductase activity	329	3239	1546	21745	6.6e-11	2.4e-08
	GO:0019208	F	phosphatase regulator activity	26	3239	50	21745	1e-09	3.1e-07
	GO:0019888	F	protein phosphatase regulator activity	25	3239	49	21745	3.5e-09	9.5e-07
	GO:0048037	F	cofactor binding	114	3239	448	21745	6.4e-09	1.5e-06
	GO:0020037	F	heme binding	122	3239	492	21745	1e-08	2.2e-06
	GO:0004497	F	monooxygenase activity	90	3239	341	21745	3.6e-08	7.1e-06
	GO:0016740	F	transferase activity	670	3239	3641	21745	5.9e-08	1e-05
	GO:0031406	F	carboxylic acid binding	27	3239	62	21745	6.3e-08	1e-05
	GO:0016705	F	oxidoreductase activity, acting on paired donors, with incorporation or reduction of molecular oxygen	95	3239	374	21745	1.1e-07	1.7e-05
	GO:0003824	F	catalytic activity	1650	3239	9594	21745	1.5e-07	2.1e-05
	GO:0046906	F	tetrapyrrole binding	122	3239	517	21745	1.8e-07	2.4e-05
	GO:0050662	F	coenzyme binding	80	3239	303	21745	1.9e-07	2.4e-05
	GO:0060089	F	molecular transducer activity	39	3239	114	21745	2.5e-07	2.9e-05
	GO:0004872	F	receptor activity	39	3239	114	21745	2.5e-07	2.9e-05
	GO:0005506	F	iron ion binding	98	3239	400	21745	4.3e-07	4.7e-05
	GO:0071949	F	FAD binding	27	3239	68	21745	6.1e-07	6.3e-05
	GO:0050660	F	flavin adenine dinucleotide binding	43	3239	138	21745	1.2e-06	0.00012
	GO:0038023	F	signaling receptor activity	35	3239	105	21745	2e-06	0.00019
	GO:0016616	F	oxidoreductase activity, acting on the CH-OH group of donors, NAD or NADP as acceptor	36	3239	112	21745	3.8e-06	0.00034
	GO:0000166	F	nucleotide binding	633	3239	3546	21745	4.7e-06	0.00037
	GO:0043167	F	ion binding	422	3239	2279	21745	4.4e-06	0.00037
	GO:1901265	F	nucleoside phosphate binding	633	3239	3546	21745	4.7e-06	0.00037
	GO:0004871	F	signal transducer activity	41	3239	136	21745	5.2e-06	0.0004
	GO:0016773	F	phosphotransferase activity, alcohol group as acceptor	295	3239	1535	21745	5.5e-06	0.00041
	GO:0004672	F	protein kinase activity	269	3239	1394	21745	9.6e-06	0.00069
	GO:0004364	F	glutathione transferase activity	20	3239	50	21745	1.5e-05	0.001
	GO:0036094	F	small molecule binding	642	3239	3640	21745	1.6e-05	0.0011
	GO:0061630	F	ubiquitin protein ligase activity	32	3239	101	21745	1.7e-05	0.0011
	GO:0016614	F	oxidoreductase activity, acting on CH-OH group of donors	38	3239	131	21745	2.9e-05	0.0019
	GO:0016301	F	kinase activity	304	3239	1645	21745	7.7e-05	0.0048
	GO:0043168	F	anion binding	47	3239	181	21745	8.2e-05	0.0049
	GO:0016765	F	transferase activity, transferring alkyl or aryl (other than methyl) groups	30	3239	101	21745	0.00012	0.0069
	GO:0016841	F	ammonia-lyase activity	7	3239	10	21745	0.00013	0.0074
	GO:0016757	F	transferase activity, transferring glycosyl groups	120	3239	580	21745	0.00013	0.0074
	GO:0004674	F	protein serine/threonine kinase activity	35	3239	126	21745	0.00015	0.0082
	GO:0043169	F	cation binding	379	3239	2125	21745	0.00022	0.012
	GO:0032553	F	ribonucleotide binding	557	3239	3216	21745	0.00023	0.012
	GO:0008061	F	chitin binding	9	3239	17	21745	0.00028	0.014
	GO:0097367	F	carbohydrate derivative binding	566	3239	3286	21745	0.00034	0.017
	GO:0061659	F	ubiquitin-like protein ligase activity	32	3239	117	21745	0.00038	0.018
	GO:0015291	F	secondary active transmembrane transporter activity	47	3239	194	21745	0.00046	0.021
	GO:0017076	F	purine nucleotide binding	548	3239	3200	21745	0.00065	0.026
	GO:0032555	F	purine ribonucleotide binding	546	3239	3185	21745	0.00061	0.026
	GO:0030955	F	potassium ion binding	7	3239	12	21745	0.00065	0.026
	GO:0031420	F	alkali metal ion binding	7	3239	12	21745	0.00065	0.026
	GO:0032550	F	purine ribonucleoside binding	546	3239	3185	21745	0.00061	0.026
	GO:0004743	F	pyruvate kinase activity	7	3239	12	21745	0.00065	0.026
	GO:0001883	F	purine nucleoside binding	546	3239	3185	21745	0.00061	0.026
	GO:0035639	F	purine ribonucleoside triphosphate binding	513	3239	2983	21745	0.00065	0.026
	GO:0042910	F	xenobiotic transporter activity	20	3239	65	21745	0.00092	0.036
	GO:0005199	F	structural constituent of cell wall	8	3239	16	21745	0.001	0.039
	GO:0030247	F	polysaccharide binding	20	3239	66	21745	0.0011	0.043
	GO:0001871	F	pattern binding	20	3239	66	21745	0.0011	0.043
	GO:0008242	F	omega peptidase activity	5	3239	7	21745	0.0012	0.044
	GO:0046872	F	metal ion binding	362	3239	2074	21745	0.0012	0.044
NV293 (S), differentially expressed genes between inoculated and control	GO:0006082	P	organic acid metabolic process	259	5570	603	21745	7e-20	4.7e-16
	GO:0019752	P	carboxylic acid metabolic process	220	5570	519	21745	1.9e-16	6.3e-13
	GO:0043436	P	oxoacid metabolic process	220	5570	521	21745	3.1e-16	6.9e-13
	GO:0051186	P	cofactor metabolic process	119	5570	249	21745	6.6e-14	1.1e-10
	GO:0044281	P	small molecule metabolic process	385	5570	1068	21745	1.4e-13	1.9e-10
	GO:0006732	P	coenzyme metabolic process	96	5570	190	21745	2.4e-13	2.7e-10
	GO:1901564	P	organonitrogen compound metabolic process	482	5570	1416	21745	5.9e-12	5.7e-09
	GO:0009765	P	photosynthesis, light harvesting	23	5570	26	21745	2.9e-11	2.4e-08
	GO:0032787	P	monocarboxylic acid metabolic process	102	5570	232	21745	1.3e-09	1e-06
	GO:0006520	P	cellular amino acid metabolic process	104	5570	240	21745	2.4e-09	1.5e-06
	GO:0044710	P	single-organism metabolic process	650	5570	2051	21745	2.4e-09	1.5e-06
	GO:0006090	P	pyruvate metabolic process	40	5570	69	21745	1.4e-08	7.7e-06
	GO:0006099	P	tricarboxylic acid cycle	25	5570	35	21745	1.8e-08	9.6e-06
	GO:0051188	P	cofactor biosynthetic process	68	5570	145	21745	3.1e-08	1.5e-05
	GO:0009108	P	coenzyme biosynthetic process	48	5570	93	21745	8.1e-08	3.7e-05
	GO:0006091	P	generation of precursor metabolites and energy	112	5570	279	21745	9.7e-08	4.1e-05
	GO:0006790	P	sulfur compound metabolic process	61	5570	130	21745	1.5e-07	5.9e-05
	GO:0044763	P	single-organism cellular process	901	5570	3010	21745	3.3e-07	0.00012
	GO:0045184	P	establishment of protein localization	112	5570	287	21745	5.2e-07	0.00019
	GO:0044283	P	small molecule biosynthetic process	135	5570	360	21745	5.7e-07	0.00019
	GO:0006733	P	oxidoreduction coenzyme metabolic process	48	5570	98	21745	6.2e-07	0.0002
	GO:0015031	P	protein transport	110	5570	283	21745	8.1e-07	0.00025
	GO:0046496	P	nicotinamide nucleotide metabolic process	44	5570	88	21745	8.7e-07	0.00025
	GO:0009060	P	aerobic respiration	25	5570	40	21745	9.9e-07	0.00028
	GO:0046395	P	carboxylic acid catabolic process	21	5570	31	21745	1.1e-06	0.00028
	GO:0008104	P	protein localization	113	5570	294	21745	1.1e-06	0.00029
	GO:0016053	P	organic acid biosynthetic process	112	5570	292	21745	1.4e-06	0.00034
	GO:0044272	P	sulfur compound biosynthetic process	19	5570	27	21745	1.4e-06	0.00034
	GO:0072524	P	pyridine-containing compound metabolic process	46	5570	95	21745	1.6e-06	0.00037
	GO:0019362	P	pyridine nucleotide metabolic process	44	5570	90	21745	1.9e-06	0.00043
	GO:0006558	P	L-phenylalanine metabolic process	13	5570	16	21745	5.1e-06	0.0011
	GO:0006886	P	intracellular protein transport	89	5570	230	21745	1e-05	0.0021
	GO:0071616	P	acyl-CoA biosynthetic process	11	5570	13	21745	1.4e-05	0.0025
	GO:0035384	P	thioester biosynthetic process	11	5570	13	21745	1.4e-05	0.0025
	GO:0016054	P	organic acid catabolic process	22	5570	37	21745	1.4e-05	0.0025
	GO:0034613	P	cellular protein localization	92	5570	241	21745	1.4e-05	0.0025
	GO:0070727	P	cellular macromolecule localization	92	5570	241	21745	1.4e-05	0.0025
	GO:0043603	P	cellular amide metabolic process	226	5570	684	21745	1.2e-05	0.0025
	GO:0006085	P	acetyl-CoA biosynthetic process	11	5570	13	21745	1.4e-05	0.0025
	GO:0006084	P	acetyl-CoA metabolic process	13	5570	17	21745	1.7e-05	0.0028
	GO:0006518	P	peptide metabolic process	220	5570	667	21745	1.8e-05	0.0029
	GO:0044699	P	single-organism process	1112	5570	3862	21745	2.1e-05	0.0035
	GO:0044711	P	single-organism biosynthetic process	286	5570	901	21745	3.2e-05	0.0049
	GO:0046394	P	carboxylic acid biosynthetic process	89	5570	236	21745	3.2e-05	0.0049
	GO:0006559	P	L-phenylalanine catabolic process	9	5570	10	21745	3.7e-05	0.0055
	GO:0071229	P	cellular response to acid chemical	32	5570	65	21745	3.8e-05	0.0056
	GO:1901607	P	alpha-amino acid biosynthetic process	47	5570	108	21745	4.2e-05	0.0061
	GO:0009738	P	abscisic acid-activated signaling pathway	27	5570	52	21745	4.6e-05	0.0062
	GO:0097306	P	cellular response to alcohol	27	5570	52	21745	4.6e-05	0.0062
	GO:0071215	P	cellular response to abscisic acid stimulus	27	5570	52	21745	4.6e-05	0.0062
	GO:0006086	P	acetyl-CoA biosynthetic process from pyruvate	10	5570	12	21745	4.8e-05	0.0063
	GO:1901605	P	alpha-amino acid metabolic process	56	5570	136	21745	5.7e-05	0.0074
	GO:0006757	P	ATP generation from ADP	27	5570	53	21745	7e-05	0.0082
	GO:0006096	P	glycolytic process	27	5570	53	21745	7e-05	0.0082
	GO:0046031	P	ADP metabolic process	27	5570	53	21745	7e-05	0.0082
	GO:0009179	P	purine ribonucleoside diphosphate metabolic process	27	5570	53	21745	7e-05	0.0082
	GO:0009135	P	purine nucleoside diphosphate metabolic process	27	5570	53	21745	7e-05	0.0082
	GO:0009185	P	ribonucleoside diphosphate metabolic process	27	5570	53	21745	7e-05	0.0082
	GO:0009063	P	cellular amino acid catabolic process	15	5570	23	21745	7.5e-05	0.0086
	GO:0006165	P	nucleoside diphosphate phosphorylation	28	5570	56	21745	8e-05	0.0089
	GO:0046939	P	nucleotide phosphorylation	28	5570	56	21745	8e-05	0.0089
	GO:0006637	P	acyl-CoA metabolic process	13	5570	19	21745	0.00011	0.012
	GO:0035383	P	thioester metabolic process	13	5570	19	21745	0.00011	0.012
	GO:1901701	P	cellular response to oxygen-containing compound	40	5570	91	21745	0.00012	0.012
	GO:0009132	P	nucleoside diphosphate metabolic process	28	5570	57	21745	0.00012	0.012
	GO:0071396	P	cellular response to lipid	33	5570	71	21745	0.00012	0.012
	GO:1901566	P	organonitrogen compound biosynthetic process	325	5570	1059	21745	0.00017	0.017
	GO:0051649	P	establishment of localization in cell	117	5570	339	21745	0.00019	0.019
	GO:0051641	P	cellular localization	120	5570	350	21745	0.00022	0.021
	GO:0042775	P	mitochondrial ATP synthesis coupled electron transport	6	5570	6	21745	0.00028	0.027
	GO:0033036	P	macromolecule localization	132	5570	394	21745	0.00033	0.032
	GO:0009069	P	serine family amino acid metabolic process	20	5570	38	21745	0.00034	0.032
	GO:0046907	P	intracellular transport	115	5570	337	21745	0.00035	0.032
	GO:0044724	P	single-organism carbohydrate catabolic process	30	5570	66	21745	0.00039	0.035
	GO:1901700	P	response to oxygen-containing compound	50	5570	126	21745	0.00039	0.035
	GO:0009416	P	response to light stimulus	22	5570	44	21745	0.00045	0.04
	GO:1901565	P	organonitrogen compound catabolic process	29	5570	64	21745	0.00052	0.045
	GO:0001101	P	response to acid chemical	40	5570	97	21745	0.00058	0.05
	GO:0016614	F	oxidoreductase activity, acting on CH-OH group of donors	67	5570	131	21745	4.3e-10	4.7e-07
	GO:0010427	F	abscisic acid binding	23	5570	28	21745	6.2e-10	4.7e-07
	GO:0016491	F	oxidoreductase activity	508	5570	1546	21745	5.3e-10	4.7e-07
	GO:0016616	F	oxidoreductase activity, acting on the CH-OH group of donors, NAD or NADP as acceptor	60	5570	112	21745	3.1e-10	4.7e-07
	GO:0048037	F	cofactor binding	173	5570	448	21745	1.6e-09	9.9e-07
	GO:0042562	F	hormone binding	23	5570	29	21745	2.3e-09	1.2e-06
	GO:0019212	F	phosphatase inhibitor activity	24	5570	32	21745	7.3e-09	2.5e-06
	GO:0004864	F	protein phosphatase inhibitor activity	24	5570	32	21745	7.3e-09	2.5e-06
	GO:0033293	F	monocarboxylic acid binding	26	5570	36	21745	6.5e-09	2.5e-06
	GO:0003824	F	catalytic activity	2730	5570	9594	21745	9.1e-08	2.8e-05
	GO:0010181	F	FMN binding	21	5570	31	21745	1.1e-06	0.00029
	GO:0016841	F	ammonia-lyase activity	10	5570	10	21745	1.2e-06	0.0003
	GO:0019208	F	phosphatase regulator activity	29	5570	50	21745	1.3e-06	0.0003
	GO:0051537	F	2 iron, 2 sulfur cluster binding	18	5570	25	21745	1.6e-06	0.00035
	GO:0019888	F	protein phosphatase regulator activity	28	5570	49	21745	2.9e-06	0.0006
	GO:0051540	F	metal cluster binding	42	5570	86	21745	3.3e-06	0.0006
	GO:0051536	F	iron-sulfur cluster binding	42	5570	86	21745	3.3e-06	0.0006
	GO:0016836	F	hydro-lyase activity	32	5570	60	21745	4.5e-06	0.00076
	GO:0046961	F	proton-transporting ATPase activity, rotational mechanism	16	5570	22	21745	5e-06	0.00081
	GO:0016740	F	transferase activity	1057	5570	3641	21745	9.2e-06	0.0014
	GO:0071949	F	FAD binding	34	5570	68	21745	1.4e-05	0.0021
	GO:0016769	F	transferase activity, transferring nitrogenous groups	17	5570	26	21745	2.3e-05	0.0031
	GO:0008483	F	transaminase activity	17	5570	26	21745	2.3e-05	0.0031
	GO:0031406	F	carboxylic acid binding	31	5570	62	21745	3.4e-05	0.0043
	GO:0022804	F	active transmembrane transporter activity	113	5570	314	21745	3.5e-05	0.0043
	GO:0042910	F	xenobiotic transporter activity	32	5570	65	21745	3.8e-05	0.0045
	GO:0016757	F	transferase activity, transferring glycosyl groups	192	5570	580	21745	4.4e-05	0.0048
	GO:0043168	F	anion binding	71	5570	181	21745	4.4e-05	0.0048
	GO:0008135	F	translation factor activity, RNA binding	45	5570	104	21745	7.2e-05	0.0076
	GO:0015291	F	secondary active transmembrane transporter activity	74	5570	194	21745	9e-05	0.0092
	GO:0003743	F	translation initiation factor activity	31	5570	65	21745	0.00011	0.011
	GO:0036402	F	proteasome-activating ATPase activity	8	5570	9	21745	0.00013	0.012
	GO:0016747	F	transferase activity, transferring acyl groups other than amino-acyl groups	102	5570	289	21745	0.00019	0.017
	GO:0050662	F	coenzyme binding	106	5570	303	21745	0.00021	0.018
	GO:0004222	F	metalloendopeptidase activity	30	5570	64	21745	0.0002	0.018
	GO:0036442	F	hydrogen-exporting ATPase activity	18	5570	32	21745	0.00023	0.019
	GO:0016746	F	transferase activity, transferring acyl groups	117	5570	342	21745	0.00028	0.021
	GO:0000166	F	nucleotide binding	1007	5570	3546	21745	0.00027	0.021
	GO:1901265	F	nucleoside phosphate binding	1007	5570	3546	21745	0.00027	0.021
	GO:0004738	F	pyruvate dehydrogenase activity	6	5570	6	21745	0.00028	0.021
	GO:0004739	F	pyruvate dehydrogenase (acetyl-transferring) activity	6	5570	6	21745	0.00028	0.021
	GO:0050660	F	flavin adenine dinucleotide binding	54	5570	138	21745	0.00036	0.026
	GO:0016860	F	intramolecular oxidoreductase activity	16	5570	28	21745	0.0004	0.028
	GO:0005525	F	GTP binding	107	5570	312	21745	0.00044	0.03
	GO:0032561	F	guanyl ribonucleotide binding	107	5570	312	21745	0.00044	0.03
	GO:0004364	F	glutathione transferase activity	24	5570	50	21745	0.00055	0.037
	GO:0005737	C	cytoplasm	443	5570	1269	21745	6.8e-13	7.6e-10
	GO:1990204	C	oxidoreductase complex	33	5570	48	21745	4.8e-10	2.7e-07
	GO:0044444	C	cytoplasmic part	362	5570	1057	21745	7.5e-10	2.8e-07
	GO:0016020	C	membrane	791	5570	2593	21745	7.2e-08	2e-05
	GO:0009507	C	chloroplast	26	5570	41	21745	4e-07	8.8e-05
	GO:0031090	C	organelle membrane	74	5570	175	21745	1.3e-06	0.00024
	GO:0009536	C	plastid	28	5570	48	21745	1.7e-06	0.00025
	GO:0009654	C	photosystem II oxygen evolving complex	16	5570	21	21745	1.8e-06	0.00025
	GO:0030662	C	coated vesicle membrane	24	5570	41	21745	8.4e-06	0.00067
	GO:0012506	C	vesicle membrane	24	5570	41	21745	8.4e-06	0.00067
	GO:0030659	C	cytoplasmic vesicle membrane	24	5570	41	21745	8.4e-06	0.00067
	GO:0030120	C	vesicle coat	24	5570	41	21745	8.4e-06	0.00067
	GO:0044433	C	cytoplasmic vesicle part	25	5570	43	21745	6.4e-06	0.00067
	GO:0033176	C	proton-transporting V-type ATPase complex	14	5570	18	21745	5.4e-06	0.00067
	GO:0000502	C	proteasome complex	23	5570	41	21745	3.3e-05	0.0025
	GO:0005746	C	mitochondrial respiratory chain	9	5570	10	21745	3.7e-05	0.0026
	GO:0030117	C	membrane coat	32	5570	68	21745	0.00011	0.0067
	GO:0044425	C	membrane part	154	5570	459	21745	0.00011	0.0067
	GO:0048475	C	coated membrane	32	5570	68	21745	0.00011	0.0067
	GO:0098800	C	inner mitochondrial membrane protein complex	17	5570	29	21745	0.00017	0.0095
	GO:0030660	C	Golgi-associated vesicle membrane	16	5570	27	21745	0.00022	0.01
	GO:0005798	C	Golgi-associated vesicle	16	5570	27	21745	0.00022	0.01
	GO:0044455	C	mitochondrial membrane part	18	5570	32	21745	0.00023	0.01
	GO:0098798	C	mitochondrial protein complex	18	5570	32	21745	0.00023	0.01
	GO:0098588	C	bounding membrane of organelle	47	5570	114	21745	0.0002	0.01
	GO:0098796	C	membrane protein complex	139	5570	415	21745	0.00024	0.01
	GO:0097708	C	intracellular vesicle	27	5570	57	21745	0.00033	0.012
	GO:0031982	C	vesicle	27	5570	57	21745	0.00033	0.012
	GO:0031988	C	membrane-bounded vesicle	27	5570	57	21745	0.00033	0.012
	GO:0031410	C	cytoplasmic vesicle	27	5570	57	21745	0.00033	0.012
	GO:0016023	C	cytoplasmic, membrane-bounded vesicle	27	5570	57	21745	0.00033	0.012
	GO:0019898	C	extrinsic component of membrane	14	5570	23	21745	0.00038	0.013
	GO:0030135	C	coated vesicle	26	5570	55	21745	0.00044	0.015
	GO:0044434	C	chloroplast part	13	5570	21	21745	0.00048	0.016
	GO:0033179	C	proton-transporting V-type ATPase, V0 domain	8	5570	10	21745	0.0005	0.016
	GO:0005740	C	mitochondrial envelope	35	5570	83	21745	0.00076	0.024
	GO:0030663	C	COPI-coated vesicle membrane	10	5570	15	21745	0.00098	0.027
	GO:0030126	C	COPI vesicle coat	10	5570	15	21745	0.00098	0.027
	GO:0030137	C	COPI-coated vesicle	10	5570	15	21745	0.00098	0.027
	GO:0044435	C	plastid part	15	5570	27	21745	0.0009	0.027
	GO:0098805	C	whole membrane	39	5570	96	21745	0.00095	0.027
	GO:0005743	C	mitochondrial inner membrane	24	5570	52	21745	0.0011	0.029
	GO:0044431	C	Golgi apparatus part	25	5570	55	21745	0.0012	0.03
	GO:0031976	C	plastid thylakoid	8	5570	11	21745	0.0014	0.033
	GO:0009535	C	chloroplast thylakoid membrane	8	5570	11	21745	0.0014	0.033
	GO:0009534	C	chloroplast thylakoid	8	5570	11	21745	0.0014	0.033
	GO:0019773	C	proteasome core complex, alpha-subunit complex	8	5570	11	21745	0.0014	0.033
	GO:0055035	C	plastid thylakoid membrane	8	5570	11	21745	0.0014	0.033
	GO:0005852	C	eukaryotic translation initiation factor 3 complex	15	5570	28	21745	0.0015	0.034
	GO:0019866	C	organelle inner membrane	24	5570	53	21745	0.0015	0.034
	GO:0098803	C	respiratory chain complex	13	5570	23	21745	0.0016	0.034
	GO:0033180	C	proton-transporting V-type ATPase, V1 domain	6	5570	7	21745	0.0015	0.034
	GO:0070469	C	respiratory chain	13	5570	23	21745	0.0016	0.034
	GO:0031966	C	mitochondrial membrane	33	5570	80	21745	0.0017	0.034
	GO:0005839	C	proteasome core complex	16	5570	31	21745	0.0017	0.035

## Sheet: Table_S5
Table S5 : Results table for DESeq2 (v. 1.38.3; R v. 4.2.2), differential expression between NV293 (S) and NV640 (R)(leaf tissue) after inoculation with Botrytis fabae. Pfam, PANTHER and SUPERFAMILY functional annotations. Results sorted and ranked by Padj (Benjamini and Hochberg, 1995). Reads counted against annotation of Vicia faba cv. Hedin2, assembly GCA_948472305.1, accessed 14 November 2023
QTLs qFB1.1, qFB1.2, qFB1.3, qFB6.1, qFB6.2 mapped from Gela et al., 2022
rank	RefSeqID	gene	baseMean	log2FoldChange	lfcSE	stat	pvalue	padj	padj>0.05	QTLs	Pfam	PANTHER	SUPERFAMILY	GO-terms
1	gene-VFH_III194160	Vfaba.Hedin2.R1.3g194160.1	428.141	-2.95864	0.397481	-7.44348	9.80684e-14	2.0306e-09	yes	-	Wall-associated receptor kinase galacturonan-binding, Protein kinase domain	RUST RESISTANCE KINASE LR10-RELATED	Protein kinase-like (PK-like)	GO:0005524|GO:0030247|GO:0004672|GO:0006468
2	gene-VFH_I298720	Vfaba.Hedin2.R1.1g298720.1	54.4176	5.4712	0.748013	7.31431	2.58715e-13	2.67847e-09	yes	-	Domain of unknown function (DUF4371)	GENERAL TRANSCRIPTION FACTOR 2-RELATED ZINC FINGER PROTEIN	Ribonuclease H-like	-
3	gene-VFH_I051960	Vfaba.Hedin2.R1.1g051960.1	662.681	-6.25723	0.87253	-7.17136	7.42573e-13	5.12524e-09	yes	LG1@168.9	Nucleoside transporter	EQUILIBRATIVE NUCLEOSIDE TRANSPORTER	-	GO:0005337|GO:0016020|GO:1901642
4	gene-VFH_III086440	Vfaba.Hedin2.R1.3g086440.1	883.504	9.20039	1.29045	7.12958	1.00678e-12	5.21161e-09	yes	LG3@75.2, LG3@119.2	EF hand associated, EF hand associated, Ras family, Ras family	EF-HAND CALCIUM-BINDING DOMAIN-CONTAINING PROTEIN 7	P-loop containing nucleoside triphosphate hydrolases, P-loop containing nucleoside triphosphate hydrolases, EF-hand	GO:0005509|GO:0003924|GO:0005525|GO:0005741|GO:0007005
5	gene-VFH_VI076160	Vfaba.Hedin2.R1.6g076160.1	476.287	-1.50252	0.21325	-7.04584	1.8435e-12	7.20885e-09	yes	-	TCP-1/cpn60 chaperonin family	60 KDA HEAT SHOCK PROTEIN, MITOCHONDRIAL	GroEL-intermediate domain like, GroEL-intermediate domain like, GroEL apical domain-like, GroEL equatorial domain-like	GO:0005524|GO:0042026|GO:0140662
6	gene-VFH_I225760	Vfaba.Hedin2.R1.1g225760.1	244.715	2.70693	0.385141	7.02842	2.08892e-12	7.20885e-09	yes	-	Cytochrome P450, Cytochrome P450	CYTOCHROME P450 93A3-LIKE	Cytochrome P450	GO:0005506|GO:0016705|GO:0004497|GO:0020037
7	gene-VFH_III047680	Vfaba.Hedin2.R1.3g047680.1	1336.82	-1.47791	0.225153	-6.564	5.23824e-11	1.36504e-07	yes	-	Calcineurin-like phosphoesterase	TYROSINE-PROTEIN PHOSPHATASE RLPH2	Metallo-dependent phosphatases	GO:0016787
8	gene-VFH_II004760	Vfaba.Hedin2.R1.2g004760.1	557.636	-11.3233	1.72532	-6.56299	5.27401e-11	1.36504e-07	yes	-	NmrA-like family	PINORESINOL REDUCTASE-RELATED	NAD(P)-binding Rossmann-fold domains	GO:0016491
9	gene-VFH_VI072560	Vfaba.Hedin2.R1.6g072560.3	371.232	2.61039	0.408791	6.38563	1.70691e-10	3.90369e-07	yes	-	Leucine Rich Repeat, TIR domain, NB-ARC domain	LEUCINE-RICH REPEAT-CONTAINING PROTEIN	P-loop containing nucleoside triphosphate hydrolases, Toll/Interleukin receptor TIR domain, L domain-like, Winged helix DNA-binding domain	GO:0043531|GO:0007165|GO:0006952
10	gene-VFH_VI010960	Vfaba.Hedin2.R1.6g010960.1	353.152	3.04864	0.478901	6.36591	1.94141e-10	3.90369e-07	yes	-	Protein tyrosine and serine/threonine kinase, D-mannose binding lectin	RECEPTOR-LIKE SERINE/THREONINE-PROTEIN KINASE SD1-8	Protein kinase-like (PK-like), alpha-D-mannose-specific plant lectins	GO:0004674|GO:0004672|GO:0006468|GO:0005524
11	gene-VFH_II277240	Vfaba.Hedin2.R1.2g277240.1	1889.03	-1.98217	0.31187	-6.35577	2.07382e-10	3.90369e-07	yes	-	D-3-phosphoglycerate dehydrogenase intervening domain, D-isomer specific 2-hydroxyacid dehydrogenase, NAD binding domain, D-isomer specific 2-hydroxyacid dehydrogenase, NAD binding domain, D-isomer specific 2-hydroxyacid dehydrogenase, catalytic domain	FORMATE DEHYDROGENASE 1	ACT-like, Formate/glycerate dehydrogenase catalytic domain-like, NAD(P)-binding Rossmann-fold domains, Serine metabolism enzymes domain	GO:0016616|GO:0051287
12	gene-VFH_I270840	Vfaba.Hedin2.R1.1g270840.1	69.2494	-19.8536	3.13209	-6.33878	2.31593e-10	3.99614e-07	yes	-	-	-	Metallo-dependent hydrolases	-
13	gene-VFH_I293760	Vfaba.Hedin2.R1.1g293760.1	587.913	-2.26404	0.358297	-6.31889	2.63445e-10	4.19608e-07	yes	-	Major Facilitator Superfamily	MAJOR FACILITATOR SUPERFAMILY TRANSPORTER 16, ISOFORM B, MAJOR FACILITATOR SUPERFAMILY TRANSPORTER 16, ISOFORM B	MFS general substrate transporter	GO:0016020|GO:0022857|GO:0055085
14	gene-VFH_I081320	Vfaba.Hedin2.R1.1g081320.2	295.932	4.66252	0.769989	6.05531	1.40148e-09	2.07279e-06	yes	LG1@168.9	Ubiquitin-conjugating enzyme	(E3-INDEPENDENT) E2 UBIQUITIN-CONJUGATING ENZYME	UBC-like	-
15	gene-VFH_I248680	Vfaba.Hedin2.R1.1g248680.1	45.6107	8.70462	1.44286	6.03289	1.6105e-09	2.22314e-06	yes	-	non-haem dioxygenase in morphine synthesis N-terminal, 2OG-Fe(II) oxygenase superfamily	OXOGLUTARATE/IRON-DEPENDENT DIOXYGENASE	Clavaminate synthase-like	-
16	gene-VFH_I284240	Vfaba.Hedin2.R1.1g284240.1	119.917	-3.63231	0.615017	-5.90603	3.50444e-09	4.48314e-06	yes	-	E1-E2 ATPase	CATION TRANSPORTING ATPASE	Calcium ATPase, transmembrane domain M, Calcium ATPase, transduction domain A, HAD-like	GO:0000166
17	gene-VFH_I000480	Vfaba.Hedin2.R1.1g000480.1	318.612	-2.94695	0.499933	-5.89469	3.75388e-09	4.48314e-06	yes	-	LITAF-like zinc ribbon domain	LIPOPOLYSACCHARIDE-INDUCED TUMOR NECROSIS FACTOR-ALPHA FACTOR	-	-
18	gene-VFH_IV146200	Vfaba.Hedin2.R1.4g146200.1	1124.69	-1.62793	0.27646	-5.8885	3.89726e-09	4.48314e-06	yes	-	RmlD substrate binding domain	DTDP-4-DEHYDRORHAMNOSE REDUCTASE	NAD(P)-binding Rossmann-fold domains	-
19	gene-VFH_IV068840	Vfaba.Hedin2.R1.4g068840.2	70.3874	5.34445	0.922557	5.79309	6.91035e-09	7.53083e-06	yes	-	-	IQ DOMAIN-CONTAINING PROTEIN IQM3	-	-
20	gene-VFH_III122080	Vfaba.Hedin2.R1.3g122080.1	929.799	2.48803	0.431453	5.76663	8.08703e-09	8.37251e-06	yes	LG3@75.2, LG3@119.2, LG3@136.5	Membrane transport protein	-	-	GO:0016020|GO:0055085|GO:0080162
21	gene-VFH_V123280	Vfaba.Hedin2.R1.5g123280.1	1657.61	2.15447	0.376079	5.72878	1.01157e-08	9.97409e-06	yes	-	Kelch motif, Kelch motif, F-box domain	F-BOX/KELCH-REPEAT PROTEIN OR23	F-box domain, Kelch motif	GO:0005515
22	gene-VFH_IV229920	Vfaba.Hedin2.R1.4g229920.1	487.685	2.23494	0.395329	5.65336	1.57342e-08	1.48088e-05	yes	-	Glycosyl hydrolase family 1, Glycosyl hydrolase family 1	GLYCOSYL HYDROLASE	(Trans)glycosidases	GO:0004553|GO:0005975
23	gene-VFH_I247960	Vfaba.Hedin2.R1.1g247960.1	246.301	2.40828	0.438446	5.49275	3.95714e-08	3.56246e-05	yes	-	Phosphoinositide-specific phospholipase C, efhand-like, Phosphatidylinositol-specific phospholipase C, X domain, Phosphatidylinositol-specific phospholipase C, Y domain, C2 domain	PHOSPHOINOSITIDE-SPECIFIC PHOSPHOLIPASE C FAMILY PROTEIN	PLC-like phosphodiesterases, C2 domain (Calcium/lipid-binding domain, CaLB), EF-hand	GO:0006629|GO:0008081|GO:0004435|GO:0007165|GO:0035556
24	gene-VFH_II005000	Vfaba.Hedin2.R1.2g005000.1	19.8162	-18.2189	3.36738	-5.4104	6.28854e-08	5.42544e-05	yes	-	Zinc-binding RING-finger, Cellulose synthase	X-BOX TRANSCRIPTION FACTOR-RELATED	RING/U-box, Nucleotide-diphospho-sugar transferases	GO:0016020|GO:0016760|GO:0030244
25	gene-VFH_U091480	Vfaba.Hedin2.R1.Ung091480.1	744.318	1.25979	0.236372	5.32968	9.83858e-08	7.69618e-05	yes	-	HAD-hyrolase-like, Haloacid dehalogenase-like hydrolase	4-NITROPHENYLPHOSPHATASE-RELATED		GO:0016791
26	gene-VFH_III072520	Vfaba.Hedin2.R1.3g072520.1	130.295	3.2378	0.607813	5.32696	9.98684e-08	7.69618e-05	yes	LG3@75.2, LG3@119.2	GMC oxidoreductase, GMC oxidoreductase	LONG-CHAIN-ALCOHOL OXIDASE	FAD/NAD(P)-binding domain	GO:0046577|GO:0016614|GO:0050660
27	gene-VFH_V122320	Vfaba.Hedin2.R1.5g122320.1	1491.52	-0.800351	0.15027	-5.32608	1.00356e-07	7.69618e-05	yes	-	Adaptor complexes medium subunit family	COATOMER SUBUNIT DELTA	SNARE-like, Second domain of Mu2 adaptin subunit (ap50) of ap2 adaptor	GO:0006890|GO:0030126
28	gene-VFH_III147600	Vfaba.Hedin2.R1.3g147600.1	360.753	2.84408	0.545123	5.21731	1.81537e-07	0.000134247	yes	LG3@136.5, LG3@144.5	Protein tyrosine and serine/threonine kinase, Salt stress response/antifungal, Salt stress response/antifungal	PROMASTIGOTE SURFACE ANTIGEN PROTEIN PSA	Protein kinase-like (PK-like)	GO:0004672|GO:0005524|GO:0006468
29	gene-VFH_IV200440	Vfaba.Hedin2.R1.4g200440.1	50.0819	-3.72481	0.717126	-5.19408	2.0573e-07	0.000146891	yes	-	Galactosyltransferase, Galactoside-binding lectin	BETA-1, 3-N-ACETYLGLUCOSAMINYLTRANSFERASE	Concanavalin A-like lectins/glucanases	GO:0030246|GO:0006486|GO:0016020|GO:0016758
30	gene-VFH_II200760	Vfaba.Hedin2.R1.2g200760.1	108.305	-9.88254	1.91922	-5.14924	2.61542e-07	0.000180516	yes	-	-	DNA POLYMERASE EPSILON CATALYTIC SUBUNIT A	-	-
31	gene-VFH_V118920	Vfaba.Hedin2.R1.5g118920.1	201.027	2.68092	0.526612	5.09088	3.56412e-07	0.00023806	yes	-	Endonuclease/Exonuclease/phosphatase family	TYPE IV INOSITOL POLYPHOSPHATE 5-PHOSPHATASE 9	DNase I-like	GO:0016791|GO:0046856|GO:0003824|GO:0004445|GO:0046855
32	gene-VFH_III010040	Vfaba.Hedin2.R1.3g010040.1	789.527	-1.04936	0.20645	-5.08288	3.71747e-07	0.000240544	yes	-	HEAT-like repeat, Importin-beta N-terminal domain, HEAT repeat	IMPORTIN BETA	ARM repeat	GO:0005515|GO:0006606|GO:0006886|GO:0031267
33	gene-VFH_U044240	Vfaba.Hedin2.R1.Ung044240.1	13.098	5.87295	1.1604	5.06113	4.16783e-07	0.000261512	yes	-	Cellulase (glycosyl hydrolase family 5)	FASCIN		GO:0007015|GO:0051015|GO:0004553|GO:0071704
34	gene-VFH_IV166800	Vfaba.Hedin2.R1.4g166800.1	127.286	-4.09311	0.81253	-5.03749	4.71671e-07	0.000278093	yes	-	Cytochrome P450	CYTOCHROME P450 98A9	Cytochrome P450	GO:0005506|GO:0016705|GO:0004497|GO:0020037
35	gene-VFH_III167680	Vfaba.Hedin2.R1.3g167680.1	799.316	-2.39132	0.474882	-5.0356	4.76346e-07	0.000278093	yes	-	e3 binding domain, Biotin-requiring enzyme, 2-oxoacid dehydrogenases acyltransferase (catalytic domain)	DIHYDROLIPOAMIDE ACETYL/SUCCINYL-TRANSFERASE-RELATED	CoA-dependent acyltransferases, Single hybrid motif, Peripheral subunit-binding domain of 2-oxo acid dehydrogenase complex	GO:0006086|GO:0045254|GO:0016746
36	gene-VFH_I457200	Vfaba.Hedin2.R1.1g457200.1	244.849	-1.42208	0.282614	-5.0319	4.85647e-07	0.000278093	yes	-	-	LYSYL-TRNA SYNTHETASE	Nucleic acid-binding proteins	-
37	gene-VFH_V035240	Vfaba.Hedin2.R1.5g035240.1	3073.2	2.8637	0.569608	5.02749	4.96931e-07	0.000278093	yes	-	Plant invertase/pectin methylesterase inhibitor, Pectinesterase	PECTINESTERASE	Pectin lyase-like, Plant invertase/pectin methylesterase inhibitor	GO:0030599|GO:0042545|GO:0004857
38	gene-VFH_I304560	Vfaba.Hedin2.R1.1g304560.1	170.096	-4.90556	0.977109	-5.02048	5.15416e-07	0.000280848	yes	qFB1.2	MatE, MatE	MULTIDRUG RESISTANCE PROTEIN	-	GO:0042910|GO:1990961|GO:0015297|GO:0016020|GO:0055085
39	gene-VFH_II226600	Vfaba.Hedin2.R1.2g226600.1	451.77	3.28672	0.658864	4.98846	6.08621e-07	0.000313147	yes	-	Leucine rich repeat, Leucine rich repeat N-terminal domain, Leucine Rich Repeat, Leucine Rich Repeat, Protein kinase domain	LRR RECEPTOR-LIKE SERINE/THREONINE-PROTEIN KINASE-RELATED	Protein kinase-like (PK-like), L domain-like, RNI-like	GO:0005524|GO:0005515|GO:0004672|GO:0006468
40	gene-VFH_III185480	Vfaba.Hedin2.R1.3g185480.1	92.5841	4.33193	0.86896	4.98519	6.19025e-07	0.000313147	yes	-	C2 domain	PROTEIN C2-DOMAIN ABA-RELATED 4	C2 domain (Calcium/lipid-binding domain, CaLB)	-
41	gene-VFH_VI111720	Vfaba.Hedin2.R1.6g111720.1	1002.37	-1.20966	0.242668	-4.98486	6.20063e-07	0.000313147	yes	-	Clathrin light chain	CLATHRIN LIGHT CHAIN	-	GO:0005198|GO:0006886|GO:0016192|GO:0030130|GO:0030132
42	gene-VFH_I211280	Vfaba.Hedin2.R1.1g211280.1	107.822	4.92029	0.992294	4.9585	7.10395e-07	0.000341895	yes	-	AP2 domain	ETHYLENE-RESPONSIVE TRANSCRIPTION FACTOR ERF061	DNA-binding domain	GO:0003677|GO:0003700|GO:0006355
43	gene-VFH_V157000	Vfaba.Hedin2.R1.5g157000.1	70.9227	-2.77099	0.559394	-4.95356	7.28673e-07	0.000341895	yes	-	RING-type zinc-finger	E3 UBIQUITIN-PROTEIN LIGASE BAH1	RING/U-box	-
44	gene-VFH_II014520	Vfaba.Hedin2.R1.2g014520.1	406.236	2.7151	0.548477	4.95026	7.41159e-07	0.000341895	yes	LG2@10.7	-	RING-TYPE E3 UBIQUITIN TRANSFERASE	ARM repeat, ARM repeat	GO:0005515
45	gene-VFH_V057400	Vfaba.Hedin2.R1.5g057400.2	5889.54	2.67528	0.540487	4.94976	7.43034e-07	0.000341895	yes	LG5@79.6, LG5@86.9, LG5@93.9	NAF domain, Protein kinase domain	CALCIUM/CALMODULIN-DEPENDENT PROTEIN KINASE KINASE-RELATED	Protein kinase-like (PK-like)	GO:0005524|GO:0004672|GO:0006468|GO:0007165
46	gene-VFH_U112120	Vfaba.Hedin2.R1.Ung112120.1	258.551	-1.73453	0.353245	-4.91027	9.09527e-07	0.000409406	yes	-	Dihydrodipicolinate reductase, N-terminus, Dihydrodipicolinate reductase, C-terminus	DIHYDRODIPICOLINATE REDUCTASE		GO:0008839|GO:0009089|GO:0070402
47	gene-VFH_II032560	Vfaba.Hedin2.R1.2g032560.1	2549.33	1.37378	0.280884	4.89091	1.00373e-06	0.000442198	yes	LG2@10.7	Cytochrome P450	CYTOCHROME P450 82C3-RELATED	Cytochrome P450	GO:0004497|GO:0005506|GO:0016705|GO:0020037
48	gene-VFH_VI168240	Vfaba.Hedin2.R1.6g168240.1	46.5876	-2.84846	0.583667	-4.88028	1.05935e-06	0.000454104	yes	LG6@169.6	TFA2 Winged helix domain 2, TFIIE beta subunit core domain	TRANSCRIPTION INITIATION FACTOR IIE, BETA SUBUNIT	-	GO:0005673|GO:0006367
49	gene-VFH_IV138880	Vfaba.Hedin2.R1.4g138880.1	1138.13	2.57359	0.52765	4.87746	1.07462e-06	0.000454104	yes	-	Nudix hydrolase domain, NUDIX domain	NUDIX HYDROLASE RELATED	Nudix	GO:0016787
50	gene-VFH_I380680	Vfaba.Hedin2.R1.1g380680.1	6.27576	-11.9443	2.45594	-4.86341	1.15382e-06	0.000475096	yes	-	Photosystem II 10 kDa phosphoprotein, Cytochrome b/b6/petB	CYTOCHROME B	Transmembrane di-heme cytochromes, Photosystem II 10 kDa phosphoprotein PsbH	GO:0009055|GO:0016020|GO:0016491|GO:0022904|GO:0009523|GO:0015979|GO:0042301|GO:0050821
51	gene-VFH_II174400	Vfaba.Hedin2.R1.2g174400.1	2573.36	-1.31783	0.271124	-4.86062	1.17019e-06	0.000475096	yes	LG2@102.1, LG2@169.8, LG2@171.4	Peptidase M1 N-terminal domain, ERAP1-like C-terminal domain, Peptidase family M1 domain	PROTEASE M1 ZINC METALLOPROTEASE	Leukotriene A4 hydrolase N-terminal domain, Metalloproteases ("zincins"), catalytic domain	GO:0008237|GO:0008270|GO:0006508
52	gene-VFH_VI184200	Vfaba.Hedin2.R1.6g184200.1	1068.08	-0.767126	0.158131	-4.85121	1.22708e-06	0.000481208	yes	-	OB-fold nucleic acid binding domain, tRNA synthetases class II (D, K and N), tRNA synthetases class II (D, K and N)	ASPARTYL/LYSYL-TRNA SYNTHETASE	Class II aaRS and biotin synthetases, Nucleic acid-binding proteins	GO:0004812|GO:0005524|GO:0006418|GO:0003676|GO:0000166|GO:0004816|GO:0006421
53	gene-VFH_I483920	Vfaba.Hedin2.R1.1g483920.1	83.4571	3.71782	0.766487	4.85047	1.23172e-06	0.000481208	yes	-	Glutamine amidotransferase class-I	GLUTAMINE AMIDOTRANSFERASE YLR126C-RELATED	Class I glutamine amidotransferase-like	-
54	gene-VFH_I446240	Vfaba.Hedin2.R1.1g446240.1	1182.22	1.40206	0.28985	4.83717	1.317e-06	0.000494844	yes	-	Armadillo/beta-catenin-like repeat, Armadillo/beta-catenin-like repeat	U BOX DOMAIN-CONTAINING	ARM repeat	GO:0005515
55	gene-VFH_III173840	Vfaba.Hedin2.R1.3g173840.1	1078.15	4.28265	0.885944	4.834	1.33817e-06	0.000494844	yes	-	Leucine rich repeat, Leucine rich repeat, Leucine rich repeat N-terminal domain, Leucine Rich Repeat, Protein kinase domain	LEUCINE RICH REPEAT KINASE 2	Protein kinase-like (PK-like), L domain-like, RNI-like	GO:0004672|GO:0006468|GO:0005524|GO:0005515
56	gene-VFH_II017040	Vfaba.Hedin2.R1.2g017040.1	443.514	-1.29667	0.26824	-4.83398	1.33832e-06	0.000494844	yes	LG2@10.7	-	GLYCOSYLTRANSFERASE-LIKE KOBITO 1	-	GO:0009737|GO:0030244
57	gene-VFH_IV062480	Vfaba.Hedin2.R1.4g062480.1	55.3523	5.66587	1.17612	4.81742	1.45427e-06	0.000528281	yes	-	PLAT/LH2 domain, Lipoxygenase	LIPOXYGENASE	Lipase/lipooxygenase domain (PLAT/LH2 domain), Lipoxigenase	GO:0016702|GO:0034440|GO:0046872|GO:0016491|GO:0005515
58	gene-VFH_I407360	Vfaba.Hedin2.R1.1g407360.1	1851.41	4.2353	0.881565	4.8043	1.55294e-06	0.000553844	yes	-	Jas motif, tify domain	PROTEIN TIFY 4A-RELATED-RELATED	-	-
59	gene-VFH_II125120	Vfaba.Hedin2.R1.2g125120.1	265.567	-2.51043	0.522889	-4.80108	1.57813e-06	0.000553844	yes	LG2@102.1	alpha/beta hydrolase fold, EamA-like transporter family	WAT1-RELATED PROTEIN	alpha/beta-Hydrolases, Multidrug resistance efflux transporter EmrE	GO:0016020|GO:0016787|GO:0022857
60	gene-VFH_II095760	Vfaba.Hedin2.R1.2g095760.1	1385.55	2.03283	0.424592	4.78772	1.68686e-06	0.000582134	yes	LG2@102.1	Enhanced disease susceptibility 1 protein EP domain, Lipase (class 3)	PROTEIN EDS1-RELATED	alpha/beta-Hydrolases	GO:0006952|GO:0006629
61	gene-VFH_IV241000	Vfaba.Hedin2.R1.4g241000.1	667.738	-4.74927	0.993445	-4.78061	1.74764e-06	0.000593224	yes	-	Protein of unknown function (DUF568), Eukaryotic cytochrome b561	CYTOCHROME B561 AND DOMON DOMAIN-CONTAINING PROTEIN	-	-
62	gene-VFH_V039080	Vfaba.Hedin2.R1.5g039080.1	2002.68	-2.11165	0.444412	-4.75156	2.01856e-06	0.000674134	yes	-	Acyl-ACP thioesterase	OLEOYL-ACYL CARRIER PROTEIN THIOESTERASE 1, CHLOROPLASTIC	Thioesterase/thiol ester dehydrase-isomerase, Thioesterase/thiol ester dehydrase-isomerase	GO:0006633|GO:0016297|GO:0016790
63	gene-VFH_IV112920	Vfaba.Hedin2.R1.4g112920.2	1120.36	-0.661573	0.139426	-4.74496	2.08545e-06	0.000675635	yes	-	von Willebrand factor type A domain, Ubiquitin interaction motif, Ubiquitin interaction motif, Ubiquitin interaction motif	26S PROTEASOME NON-ATPASE REGULATORY SUBUNIT 4	vWA-like	-
64	gene-VFH_IV062560	Vfaba.Hedin2.R1.4g062560.1	177.455	5.98112	1.26059	4.74468	2.08831e-06	0.000675635	yes	-	PLAT/LH2 domain, Lipoxygenase	LIPOXYGENASE	Lipase/lipooxygenase domain (PLAT/LH2 domain), Lipoxigenase	GO:0016702|GO:0034440|GO:0046872|GO:0016491|GO:0005515
65	gene-VFH_IV035920	Vfaba.Hedin2.R1.4g035920.1	916.061	-2.73429	0.576783	-4.74058	2.13105e-06	0.000678853	yes	-	Dihydrodipicolinate synthetase family	DIHYDRODIPICOLINATE SYNTHASE	Aldolase	GO:0016829|GO:0008840|GO:0009089
66	gene-VFH_IV078040	Vfaba.Hedin2.R1.4g078040.1	2069.81	-2.11397	0.449635	-4.70152	2.58228e-06	0.00081013	yes	-	N-terminal domain of oxidoreductase, Zinc-binding dehydrogenase	PROSTAGLANDIN REDUCTASE	NAD(P)-binding Rossmann-fold domains, GroES-like	GO:0016491|GO:0016628
67	gene-VFH_I360400	Vfaba.Hedin2.R1.1g360400.1	2966.68	-1.40531	0.299361	-4.69435	2.67451e-06	0.000826542	yes	-	Fumarate reductase flavoprotein C-term, FAD binding domain	SUCCINATE DEHYDROGENASE 2 FLAVOPROTEIN SUBUNIT	Succinate dehydrogenase/fumarate reductase flavoprotein, catalytic domain, FAD/NAD(P)-binding domain, Succinate dehydrogenase/fumarate reductase flavoprotein C-terminal domain	GO:0016627|GO:0022900|GO:0050660|GO:0006099|GO:0016491
68	gene-VFH_V058840	Vfaba.Hedin2.R1.5g058840.1	79.9202	3.89803	0.83475	4.6697	3.01646e-06	0.000918512	yes	LG5@79.6, LG5@86.9, LG5@93.9	Domain of unknown function (DUF4218), Plant transposase (Ptta/En/Spm family)	DUF4218 DOMAIN-CONTAINING PROTEIN-RELATED	-	-
69	gene-VFH_II257080	Vfaba.Hedin2.R1.2g257080.1	1201.72	-1.40784	0.301929	-4.6628	3.1194e-06	0.000931592	yes	-	PRA1 family protein	PRENYLATED RAB ACCEPTOR 1-RELATED	-	-
70	gene-VFH_II200680	Vfaba.Hedin2.R1.2g200680.1	14.1554	-17.6172	3.77985	-4.66083	3.1494e-06	0.000931592	yes	-	CBS domain, CBS domain	CBS DOMAIN-CONTAINING PROTEIN CBSX3, MITOCHONDRIAL	CBS-domain pair	-
71	gene-VFH_II102280	Vfaba.Hedin2.R1.2g102280.1	560.67	5.70005	1.22831	4.64055	3.47478e-06	0.00101336	yes	LG2@102.1	-	OS04G0464100 PROTEIN	-	-
72	gene-VFH_III168480	Vfaba.Hedin2.R1.3g168480.1	404.675	1.32923	0.287951	4.61617	3.90882e-06	0.00112411	yes	-	Plasma-membrane choline transporter	CHOLINE TRANSPORTER-LIKE (SLC FAMILY 44)	-	GO:0022857|GO:0055085
73	gene-VFH_II277320	Vfaba.Hedin2.R1.2g277320.1	681.075	-0.940536	0.204517	-4.59882	4.24892e-06	0.00120518	yes	-	Exocyst component 84 C-terminal, Vps51/Vps67	EXOCYST COMPLEX COMPONENT 8	Cullin repeat-like	GO:0000145|GO:0006887
74	gene-VFH_III100480	Vfaba.Hedin2.R1.3g100480.1	690.63	-1.53538	0.336734	-4.55962	5.12467e-06	0.00141334	yes	LG3@75.2, LG3@115.2, LG3@119.2, LG3@136.5	Fumarase C C-terminus, Lyase	ASPARTATEAMMONIA/ARGININOSUCCINATE/ADENYLOSUCCINATE LYASE	L-aspartase-like	GO:0006099|GO:0016829|GO:0003824|GO:0004333|GO:0006106|GO:0045239
75	gene-VFH_VI060080	Vfaba.Hedin2.R1.6g060080.1	1286.08	-1.64879	0.36177	-4.55755	5.17533e-06	0.00141334	yes	-	RING/Ubox like zinc-binding domain, Cellulose synthase	X-BOX TRANSCRIPTION FACTOR-RELATED	RING/U-box, Nucleotide-diphospho-sugar transferases	GO:0016020|GO:0016760|GO:0030244
76	gene-VFH_III172680	Vfaba.Hedin2.R1.3g172680.1	1749.57	5.0494	1.10804	4.55705	5.18759e-06	0.00141334	yes	-	Leucine rich repeat, Leucine rich repeat, Leucine rich repeat N-terminal domain, Protein kinase domain	LEUCINE RICH REPEAT KINASE 2	Protein kinase-like (PK-like), L domain-like, RNI-like	GO:0005515|GO:0004672|GO:0005524|GO:0006468
77	gene-VFH_U026040	Vfaba.Hedin2.R1.Ung026040.1	36.4787	4.26659	0.938219	4.54755	5.42746e-06	0.00144169	yes	-	Protein kinase domain, Salt stress response/antifungal, Salt stress response/antifungal	PROMASTIGOTE SURFACE ANTIGEN PROTEIN PSA		GO:0004672|GO:0006468|GO:0005524
78	gene-VFH_II081240	Vfaba.Hedin2.R1.2g081240.1	292.694	-2.53797	0.558246	-4.54632	5.45909e-06	0.00144169	yes	LG2@84.5, LG2@102.1	BPG-independent PGAM N-terminus (iPGM_N), Metalloenzyme superfamily	2, 3-BISPHOSPHOGLYCERATE-INDEPENDENT PHOSPHOGLYCERATE MUTASE	2, 3-Bisphosphoglycerate-independent phosphoglycerate mutase, substrate-binding domain, Alkaline phosphatase-like	GO:0003824|GO:0046872|GO:0004619|GO:0005737|GO:0006007|GO:0030145
79	gene-VFH_V118360	Vfaba.Hedin2.R1.5g118360.1	153.47	-3.06754	0.67505	-4.54417	5.51528e-06	0.00144169	yes	-	-	-	alpha/beta-Hydrolases	-
80	gene-VFH_III106960	Vfaba.Hedin2.R1.3g106960.1	129.414	1.81361	0.399291	4.54208	5.57014e-06	0.00144169	yes	LG3@75.2, LG3@115.2, LG3@119.2, LG3@136.5	VEFS-Box of polycomb protein	POLYCOMB GROUP PROTEIN	-	-
81	gene-VFH_I106400	Vfaba.Hedin2.R1.1g106400.1	500.363	-4.06725	0.898154	-4.52845	5.94176e-06	0.00150011	yes	LG1@168.9	Histidine kinase-, DNA gyrase B-, and HSP90-like ATPase, Hsp90 protein	HEAT SHOCK PROTEIN 90 FAMILY MEMBER	ATPase domain of HSP90 chaperone/DNA topoisomerase II/histidine kinase, Ribosomal protein S5 domain 2-like, HSP90 C-terminal domain	GO:0005524|GO:0006457|GO:0051082|GO:0016887|GO:0140662
82	gene-VFH_I327680	Vfaba.Hedin2.R1.1g327680.1	705.964	-1.05943	0.234504	-4.51772	6.25081e-06	0.00150011	yes	-	Leucine rich repeat, Leucine rich repeat	OS10G0469600 PROTEIN	L domain-like	GO:0005515
83	gene-VFH_IV078520	Vfaba.Hedin2.R1.4g078520.1	365.276	-2.51961	0.557738	-4.51756	6.25567e-06	0.00150011	yes	-	Zinc-binding dehydrogenase	PROSTAGLANDIN REDUCTASE	NAD(P)-binding Rossmann-fold domains, GroES-like	GO:0016628
84	gene-VFH_III173120	Vfaba.Hedin2.R1.3g173120.2	1725.08	4.65721	1.03104	4.517	6.27207e-06	0.00150011	yes	-	Leucine rich repeat, Leucine rich repeat, Leucine rich repeat N-terminal domain, Leucine Rich Repeat, Protein kinase domain	LEUCINE RICH REPEAT KINASE 2	Protein kinase-like (PK-like), L domain-like, L domain-like, RNI-like	GO:0004672|GO:0006468|GO:0005524|GO:0005515
85	gene-VFH_V112440	Vfaba.Hedin2.R1.5g112440.1	18.1507	-17.7574	3.93174	-4.51642	6.28924e-06	0.00150011	yes	-	-	MYB FAMILY TRANSCRIPTION FACTOR PHL11	Homeodomain-like	GO:0003700|GO:0003677
86	gene-VFH_V032640	Vfaba.Hedin2.R1.5g032640.1	43.7759	7.09344	1.57059	4.51642	6.28948e-06	0.00150011	yes	-	Cell division control protein 24, OB domain 2, Arginase family	NUCLEIC ACID-BINDING PROTEINS SUPERFAMILY, NUCLEIC ACID-BINDING PROTEINS SUPERFAMILY	Arginase/deacetylase, P-loop containing nucleoside triphosphate hydrolases	GO:0046872|GO:0016813
87	gene-VFH_VI195280	Vfaba.Hedin2.R1.6g195280.1	290.478	-1.56887	0.347406	-4.51596	6.30299e-06	0.00150011	yes	qFB6.2	Semialdehyde dehydrogenase, dimerisation domain, Semialdehyde dehydrogenase, NAD binding domain	DEHYDROGENASE, PUTATIVE-RELATED	Glyceraldehyde-3-phosphate dehydrogenase-like, C-terminal domain, NAD(P)-binding Rossmann-fold domains	GO:0008652|GO:0016620|GO:0046983|GO:0051287|GO:0004073|GO:0009086|GO:0009088|GO:0009089|GO:0009097|GO:0050661
88	gene-VFH_I139000	Vfaba.Hedin2.R1.1g139000.1	698.571	2.99252	0.663106	4.51288	6.39547e-06	0.00150483	yes	LG1@168.9	ABC transporter transmembrane region, ABC transporter transmembrane region, ABC transporter, ABC transporter	ABC TRANSPORTER B FAMILY	ABC transporter transmembrane region, ABC transporter transmembrane region, P-loop containing nucleoside triphosphate hydrolases, P-loop containing nucleoside triphosphate hydrolases	GO:0005524|GO:0016020|GO:0055085|GO:0140359|GO:0016887
89	gene-VFH_VI167680	Vfaba.Hedin2.R1.6g167680.1	303.776	-22.6892	5.0364	-4.50504	6.63597e-06	0.00154387	yes	LG6@169.6	Thaumatin family	OS03G0233200 PROTEIN	Osmotin, thaumatin-like protein	-
90	gene-VFH_I121160	Vfaba.Hedin2.R1.1g121160.1	77.5023	1.69378	0.37686	4.49446	6.97457e-06	0.00160462	yes	LG1@168.9	PPR repeat family, PPR repeat family, PPR repeat family, PPR repeat family, PPR repeat family, PPR repeat, PPR repeat, PPR repeat	OS03G0856100 PROTEIN	HCP-like	GO:0005515
91	gene-VFH_III047720	Vfaba.Hedin2.R1.3g047720.1	116.72	-8.59582	1.91694	-4.48413	7.32132e-06	0.00166588	yes	-	GDSL-like Lipase/Acylhydrolase	OSJNBB0059K02.9 PROTEIN	SGNH hydrolase	GO:0016788
92	gene-VFH_VI192320	Vfaba.Hedin2.R1.6g192320.1	124.348	1.35083	0.30144	4.48125	7.42088e-06	0.00167018	yes	qFB6.2	CRS1 / YhbY (CRM) domain	GROUP II INTRON SPLICING FACTOR CRS1-LIKE	YhbY-like	GO:0003723
93	gene-VFH_I197560	Vfaba.Hedin2.R1.1g197560.1	857.292	5.20193	1.16187	4.47722	7.56207e-06	0.00168366	yes	-	non-haem dioxygenase in morphine synthesis N-terminal, 2OG-Fe(II) oxygenase superfamily	OXOGLUTARATE/IRON-DEPENDENT DIOXYGENASE	Clavaminate synthase-like	-
94	gene-VFH_V115960	Vfaba.Hedin2.R1.5g115960.1	204.113	-3.81013	0.852942	-4.46704	7.93092e-06	0.001747	yes	-	-	HYDROXYPROLINE-RICH GLYCOPROTEIN FAMILY PROTEIN-RELATED	Clavaminate synthase-like	GO:0003729|GO:0006402|GO:0032451
95	gene-VFH_IV196120	Vfaba.Hedin2.R1.4g196120.1	1565.48	-2.8139	0.630583	-4.46237	8.10581e-06	0.00176673	yes	-	Pyridine nucleotide-disulphide oxidoreductase, Pyridine nucleotide-disulphide oxidoreductase, dimerisation domain	DISULFIDE OXIDOREDUCTASE	FAD/NAD-linked reductases, dimerisation (C-terminal) domain, FAD/NAD(P)-binding domain	GO:0016668|GO:0016491|GO:0050660|GO:0004148
96	gene-VFH_III120840	Vfaba.Hedin2.R1.3g120840.1	5076.77	-1.66368	0.373396	-4.45555	8.368e-06	0.00179488	yes	LG3@75.2, LG3@119.2, LG3@136.5	Chorismate synthase	CHORISMATE SYNTHASE	Chorismate synthase, AroC	GO:0004107|GO:0009073
97	gene-VFH_I159680	Vfaba.Hedin2.R1.1g159680.1	2094.34	-1.85915	0.417407	-4.45404	8.42683e-06	0.00179488	yes	LG1@168.9	Aldehyde dehydrogenase family	ALDEHYDE DEHYDROGENASE-RELATED	ALDH-like	GO:0016620|GO:0016491
98	gene-VFH_U060160	Vfaba.Hedin2.R1.Ung060160.1	45.0223	5.83865	1.31138	4.45231	8.49504e-06	0.00179488	yes	-	F-box domain	F-BOX PROTEIN-RELATED		GO:0005515
99	gene-VFH_I084640	Vfaba.Hedin2.R1.1g084640.1	699.587	1.62676	0.36591	4.44581	8.75629e-06	0.00183139	yes	LG1@168.9	Malectin domain, Protein tyrosine and serine/threonine kinase	LEUCINE-RICH REPEAT-CONTAINING PROTEIN DDB_G0281931-RELATED	Protein kinase-like (PK-like), L domain-like	GO:0004672|GO:0006468|GO:0005524
100	gene-VFH_III038560	Vfaba.Hedin2.R1.3g038560.1	1382.08	-0.950123	0.213927	-4.44135	8.93966e-06	0.00185105	yes	LG3@24.7, LG3@28.4	Histidyl-tRNA synthetase, Anticodon binding domain, Aromatic amino acid lyase	HISTIDYL-TRNA SYNTHETASE	Class II aaRS and biotin synthetases, Class II aaRS ABD-related, L-aspartase-like	GO:0003824|GO:0004821|GO:0005524|GO:0006427
101	gene-VFH_VI084320	Vfaba.Hedin2.R1.6g084320.1	182.773	-1.45576	0.329229	-4.42171	9.79211e-06	0.00199392	yes	-	-	EXPRESSED PROTEIN	-	GO:0009408|GO:0010115
102	gene-VFH_II099760	Vfaba.Hedin2.R1.2g099760.1	1246.59	-0.942626	0.213213	-4.42105	9.82225e-06	0.00199392	yes	LG2@102.1	ABC transporter, ABC transporter, ABC transporter	ATP-BINDING TRANSPORT PROTEIN-RELATED	P-loop containing nucleoside triphosphate hydrolases, P-loop containing nucleoside triphosphate hydrolases	GO:0005524|GO:0016887
103	gene-VFH_I203200	Vfaba.Hedin2.R1.1g203200.1	187.911	5.42937	1.22893	4.41797	9.96311e-06	0.00200287	yes	-	Protein kinase domain	LEAF RUST 10 DISEASE-RESISTANCE LOCUS RECEPTOR-LIKE PROTEIN KINASE-LIKE 1.4	Protein kinase-like (PK-like)	GO:0004672|GO:0006468|GO:0005524
104	gene-VFH_I213440	Vfaba.Hedin2.R1.1g213440.1	397.41	-3.17284	0.718933	-4.41326	1.01826e-05	0.00202732	yes	-	UDP-glucoronosyl and UDP-glucosyl transferase	GLUCOSYL/GLUCURONOSYL TRANSFERASES	UDP-Glycosyltransferase/glycogen phosphorylase	GO:0008194
105	gene-VFH_VI019440	Vfaba.Hedin2.R1.6g019440.1	1037.8	-1.17216	0.265916	-4.40802	1.04321e-05	0.00205721	yes	-	2Fe-2S iron-sulfur cluster binding domain	FERREDOXIN	2Fe-2S ferredoxin-like	GO:0051536|GO:0051537|GO:0009055|GO:0022900
106	gene-VFH_V051440	Vfaba.Hedin2.R1.5g051440.1	239.113	-1.84209	0.418126	-4.40558	1.05501e-05	0.00206037	yes	LG5@79.6, LG5@86.9, LG5@93.9	Glycosyl hydrolase family 1	GLYCOSYL HYDROLASE	(Trans)glycosidases	GO:0004553|GO:0005975
107	gene-VFH_V106920	Vfaba.Hedin2.R1.5g106920.1	182.825	1.35698	0.308334	4.40101	1.07751e-05	0.00206037	yes	-	Rx N-terminal domain, NB-ARC domain	DISEASE RESISTANCE PROTEIN RP	P-loop containing nucleoside triphosphate hydrolases, L domain-like	GO:0043531|GO:0006952
108	gene-VFH_IV047760	Vfaba.Hedin2.R1.4g047760.1	67.1108	2.90031	0.659062	4.40066	1.07921e-05	0.00206037	yes	-	GH3 auxin-responsive promoter	GH3 DOMAIN-CONTAINING PROTEIN	-	-
109	gene-VFH_III149400	Vfaba.Hedin2.R1.3g149400.1	614.498	3.30103	0.750306	4.39958	1.08462e-05	0.00206037	yes	LG3@136.5, LG3@144.5	Protein tyrosine and serine/threonine kinase, Salt stress response/antifungal, Salt stress response/antifungal	PROMASTIGOTE SURFACE ANTIGEN PROTEIN PSA	Protein kinase-like (PK-like)	GO:0005524|GO:0004672|GO:0006468
110	gene-VFH_I109960	Vfaba.Hedin2.R1.1g109960.1	129.919	-2.77151	0.630994	-4.39229	1.12162e-05	0.00207758	yes	LG1@168.9	short chain dehydrogenase	DEHYDROGENASE/REDUCTASE SDR FAMILY MEMBER 12	NAD(P)-binding Rossmann-fold domains	-
111	gene-VFH_IV061800	Vfaba.Hedin2.R1.4g061800.1	1867.28	-6.23743	1.42013	-4.39216	1.1223e-05	0.00207758	yes	-	Domain of unknown function	CASKIN	-	-
112	gene-VFH_V042000	Vfaba.Hedin2.R1.5g042000.1	354.862	-10.1271	2.30588	-4.39187	1.12378e-05	0.00207758	yes	-	F-box domain	BNACNNG10540D PROTEIN	F-box domain, Kelch motif	GO:0005515
113	gene-VFH_III087920	Vfaba.Hedin2.R1.3g087920.1	15.5694	-17.7712	4.05271	-4.38503	1.15971e-05	0.00212504	yes	LG3@75.2, LG3@119.2	Formin Homology 2 Domain	FORMIN-RELATED	Formin homology 2 domain (FH2 domain)	GO:0003779|GO:0030036|GO:0045010|GO:0051015
114	gene-VFH_II163400	Vfaba.Hedin2.R1.2g163400.1	771.847	-1.06139	0.242392	-4.37883	1.19318e-05	0.0021672	yes	LG2@102.1, LG2@169.8, LG2@171.4	Serpin (serine protease inhibitor)	SERINE PROTEASE INHIBITOR, SERPIN	Serpins	GO:0004867|GO:0005615
115	gene-VFH_IV156840	Vfaba.Hedin2.R1.4g156840.1	4230.64	-1.44622	0.331703	-4.35997	1.30083e-05	0.00234217	yes	-	DXP reductoisomerase C-terminal domain, 1-deoxy-D-xylulose 5-phosphate reductoisomerase C-terminal domain, 1-deoxy-D-xylulose 5-phosphate reductoisomerase	1-DEOXY-D-XYLULOSE 5-PHOSPHATE REDUCTOISOMERASE	1-deoxy-D-xylulose-5-phosphate reductoisomerase, C-terminal domain, Glyceraldehyde-3-phosphate dehydrogenase-like, C-terminal domain, NAD(P)-binding Rossmann-fold domains	GO:0070402|GO:0005515|GO:0008299|GO:0030604|GO:0046872
116	gene-VFH_II232920	Vfaba.Hedin2.R1.2g232920.1	74.8289	6.15104	1.4159	4.34426	1.39746e-05	0.00249446	yes	-	Probable lipid transfer	NON-SPECIFIC LIPID-TRANSFER PROTEIN 2-RELATED	Bifunctional inhibitor/lipid-transfer protein/seed storage 2S albumin	GO:0006869|GO:0008289
117	gene-VFH_III179600	Vfaba.Hedin2.R1.3g179600.1	341.505	2.68415	0.618261	4.34145	1.41545e-05	0.00250499	yes	-	G-protein alpha subunit	GTP-BINDING PROTEIN ALPHA SUBUNIT	P-loop containing nucleoside triphosphate hydrolases, Transducin (alpha subunit), insertion domain	GO:0007165|GO:0003924|GO:0007186|GO:0019001|GO:0031683
118	gene-VFH_V149840	Vfaba.Hedin2.R1.5g149840.1	58.3636	3.39945	0.78466	4.33238	1.47506e-05	0.00258465	yes	-	-	PLASTID MOVEMENT IMPAIRED PROTEIN-RELATED	-	-
119	gene-VFH_I286760	Vfaba.Hedin2.R1.1g286760.1	70.6504	6.17972	1.42691	4.33084	1.48543e-05	0.00258465	yes	-	-	TRANSMEMBRANE PROTEIN	-	-
120	gene-VFH_V058800	Vfaba.Hedin2.R1.5g058800.1	465.96	3.8376	0.891785	4.30328	1.6829e-05	0.00289922	yes	LG5@79.6, LG5@86.9, LG5@93.9	WRKY DNA -binding domain	WRKY TRANSCRIPTION FACTOR 21-RELATED	WRKY DNA-binding domain	GO:0003700|GO:0006355|GO:0043565
121	gene-VFH_II010960	Vfaba.Hedin2.R1.2g010960.1	1017.73	-1.80674	0.420094	-4.3008	1.70181e-05	0.00289922	yes	LG2@10.7	MGS-like domain, AICARFT/IMPCHase bienzyme	BIFUNCTIONAL PURINE BIOSYNTHESIS PROTEIN PURH	Cytidine deaminase-like, Methylglyoxal synthase-like	GO:0003824|GO:0003937|GO:0004643|GO:0006164
122	gene-VFH_I440320	Vfaba.Hedin2.R1.1g440320.1	275.341	-6.68247	1.55407	-4.29997	1.70822e-05	0.00289922	yes	-	Peroxidase	PEROXIDASE 72-RELATED	Heme-dependent peroxidases	GO:0004601|GO:0006979|GO:0020037|GO:0042744
123	gene-VFH_IV008040	Vfaba.Hedin2.R1.4g008040.1	1575.88	-1.41079	0.328664	-4.29251	1.76663e-05	0.00297397	yes	-	Putative S-adenosyl-L-methionine-dependent methyltransferase	SAM-DEPENDENT METHYLTRANSFERASE	S-adenosyl-L-methionine-dependent methyltransferases, S-adenosyl-L-methionine-dependent methyltransferases	GO:0008168
124	gene-VFH_IV082400	Vfaba.Hedin2.R1.4g082400.1	11.3064	5.16487	1.20556	4.28421	1.83386e-05	0.00306224	yes	-	gag-polypeptide of LTR copia-type	-	Retrovirus zinc finger-like domains	GO:0003676|GO:0008270
125	gene-VFH_I299520	Vfaba.Hedin2.R1.1g299520.1	919.219	-2.97334	0.694677	-4.28017	1.86751e-05	0.00309349	yes	-	Cytidine and deoxycytidylate deaminase zinc-binding region	CYTOSINE DEAMINASE FAMILY MEMBER	Cytidine deaminase-like	GO:0003824|GO:0008270|GO:0016787
126	gene-VFH_U106720	Vfaba.Hedin2.R1.Ung106720.1	336.859	-0.953476	0.22336	-4.26878	1.96542e-05	0.00322984	yes	-	Protein CHAPERONE-LIKE PROTEIN OF POR1-like	-		-
127	gene-VFH_U109920	Vfaba.Hedin2.R1.Ung109920.1	111.546	-4.35437	1.02068	-4.26614	1.98887e-05	0.00324265	yes	-	Serine carboxypeptidase S28	PROTEASE S28 PRO-X CARBOXYPEPTIDASE-RELATED		GO:0006508|GO:0008236
128	gene-VFH_V059360	Vfaba.Hedin2.R1.5g059360.1	171.987	1.88538	0.442601	4.25977	2.04636e-05	0.00328776	yes	LG5@79.6, LG5@86.9, LG5@93.9	Multicopper oxidase, GRAM domain, Multicopper oxidase	BNAA05G37250D PROTEIN	Cupredoxins, Cupredoxins	GO:0005507|GO:0016491
129	gene-VFH_I193800	Vfaba.Hedin2.R1.1g193800.1	27.0447	-7.31386	1.71705	-4.25956	2.0483e-05	0.00328776	yes	-	AP2 domain, AP2 domain	AP2-LIKE ETHYLENE-RESPONSIVE TRANSCRIPTION FACTOR	DNA-binding domain, DNA-binding domain	GO:0003677|GO:0003700|GO:0006355
130	gene-VFH_I480920	Vfaba.Hedin2.R1.1g480920.1	315.063	-19.8408	4.66757	-4.25078	2.13023e-05	0.00339296	yes	-	Cysteine-rich secretory protein family	CYSTEINE-RICH SECRETORY PROTEIN-RELATED	PR-1-like	GO:0005576
131	gene-VFH_IV134880	Vfaba.Hedin2.R1.4g134880.1	3843.94	-2.95423	0.695929	-4.24502	2.18574e-05	0.0034548	yes	-	Lytic transglycolase, Expansin C-terminal domain	EXPANSIN-B3	Barwin-like endoglucanases, PHL pollen allergen	GO:0005576
132	gene-VFH_I188400	Vfaba.Hedin2.R1.1g188400.1	563.49	1.74724	0.412631	4.2344	2.29163e-05	0.00359473	yes	-	Zinc finger, C3HC4 type (RING finger)	SBP (S-RIBONUCLEASE BINDING PROTEIN) FAMILY PROTEIN	-	-
133	gene-VFH_I453080	Vfaba.Hedin2.R1.1g453080.1	54.1459	22.7974	5.39843	4.22297	2.41108e-05	0.00375367	yes	-	Peptidase C13 family	HEMOGLOBINASE FAMILY MEMBER	-	GO:0004197|GO:0051603|GO:0006508|GO:0008233
134	gene-VFH_II146160	Vfaba.Hedin2.R1.2g146160.1	14.4264	7.2501	1.71787	4.2204	2.43869e-05	0.00376832	yes	LG2@102.1	Ring finger domain	RING-H2 FINGER PROTEIN ATL78	RING/U-box	GO:0016567|GO:0016740
135	gene-VFH_II056400	Vfaba.Hedin2.R1.2g056400.1	624.114	1.56792	0.372427	4.21001	2.55355e-05	0.00391657	yes	LG2@84.5	Jacalin-like lectin domain, Jacalin-like lectin domain, Jacalin-like lectin domain	JACALIN-RELATED LECTIN 3	Mannose-binding lectins, Mannose-binding lectins, Mannose-binding lectins	GO:0030246
136	gene-VFH_VI010560	Vfaba.Hedin2.R1.6g010560.1	48.7523	9.76549	2.33677	4.17906	2.92715e-05	0.00443964	yes	-	Myb-like DNA-binding domain, Myb-like DNA-binding domain	MYB FAMILY TRANSCRIPTION FACTOR	Homeodomain-like	-
137	gene-VFH_U093240	Vfaba.Hedin2.R1.Ung093240.1	34.9415	-11.7327	2.80803	-4.17826	2.93746e-05	0.00443964	yes	-	Peroxidase	PEROXIDASE 25-RELATED		GO:0004601|GO:0042744|GO:0006979|GO:0020037
138	gene-VFH_I234280	Vfaba.Hedin2.R1.1g234280.1	28.9432	-5.42708	1.29976	-4.17545	2.97395e-05	0.00446222	yes	-	Ulp1 protease family, C-terminal catalytic domain	OS10G0409366 PROTEIN-RELATED	Cysteine proteinases	GO:0006508|GO:0008234
139	gene-VFH_I345800	Vfaba.Hedin2.R1.1g345800.1	108.787	-3.50182	0.842757	-4.1552	3.25003e-05	0.00483468	yes	-	-	DOMAIN PROTEIN, PUTATIVE (AFU_ORTHOLOGUE AFUA_5G04290)-RELATED	-	-
140	gene-VFH_I273560	Vfaba.Hedin2.R1.1g273560.1	344.116	0.923273	0.22234	4.15253	3.28813e-05	0.00483468	yes	-	OTU-like cysteine protease	HIV-INDUCED PROTEIN-7-LIKE PROTEASE	Cysteine proteinases	-
141	gene-VFH_V001840	Vfaba.Hedin2.R1.5g001840.1	179.001	3.52964	0.850055	4.15225	3.29223e-05	0.00483468	yes	-	-	F17F16.3 PROTEIN	-	-
142	gene-VFH_II195160	Vfaba.Hedin2.R1.2g195160.1	191.262	5.91438	1.42526	4.14969	3.32929e-05	0.00484553	yes	-	Polyketide cyclase / dehydrase and lipid transport	LACHRYMATORY-FACTOR SYNTHASE	Bet v1-like	-
143	gene-VFH_I298440	Vfaba.Hedin2.R1.1g298440.1	8482.56	-2.23468	0.53867	-4.14851	3.34643e-05	0.00484553	yes	-	S-adenosylmethionine synthetase, C-terminal domain, S-adenosylmethionine synthetase, central domain, S-adenosylmethionine synthetase, N-terminal domain	S-ADENOSYLMETHIONINE SYNTHETASE	S-adenosylmethionine synthetase, S-adenosylmethionine synthetase, S-adenosylmethionine synthetase	GO:0004478|GO:0005524|GO:0006556
144	gene-VFH_I373560	Vfaba.Hedin2.R1.1g373560.1	109.873	3.13127	0.756382	4.13979	3.47621e-05	0.0049985	yes	-	GRAS domain family	OSJNBA0084A10.13 PROTEIN-RELATED	-	-
145	gene-VFH_II154280	Vfaba.Hedin2.R1.2g154280.1	1483.37	-0.955889	0.231423	-4.13048	3.62001e-05	0.00516937	yes	LG2@102.1	Cleft lip and palate transmembrane protein 1 (CLPTM1)	CLEFT LIP AND PALATE ASSOCIATED TRANSMEMBRANE PROTEIN-RELATED	-	GO:0016020
146	gene-VFH_I213320	Vfaba.Hedin2.R1.1g213320.1	365.735	-3.1735	0.768618	-4.12885	3.6459e-05	0.00517068	yes	-	UDP-glucoronosyl and UDP-glucosyl transferase	GLUCOSYL/GLUCURONOSYL TRANSFERASES	UDP-Glycosyltransferase/glycogen phosphorylase	GO:0008194
147	gene-VFH_VI038400	Vfaba.Hedin2.R1.6g038400.1	1068.2	-1.24043	0.300731	-4.12471	3.7121e-05	0.00522876	yes	-	Omp85 superfamily domain	SORTING AND ASSEMBLY MACHINERY SAMM50 PROTEIN FAMILY MEMBER	-	GO:0006886|GO:0015450|GO:0019867
148	gene-VFH_IV074960	Vfaba.Hedin2.R1.4g074960.1	833.698	1.44026	0.34942	4.12187	3.75811e-05	0.00525779	yes	-	D-mannose binding lectin	G-TYPE LECTIN S-RECEPTOR-LIKE SERINE/THREONINE-PROTEIN KINASE SD2-5	alpha-D-mannose-specific plant lectins	-
149	gene-VFH_I230880	Vfaba.Hedin2.R1.1g230880.1	378.632	2.66644	0.647593	4.11746	3.83074e-05	0.0053144	yes	-	Dimerisation domain, O-methyltransferase domain	O-METHYLTRANSFERASE	S-adenosyl-L-methionine-dependent methyltransferases, Winged helix DNA-binding domain	GO:0046983|GO:0008168|GO:0008171
150	gene-VFH_II239800	Vfaba.Hedin2.R1.2g239800.1	743.592	-0.839726	0.204029	-4.11571	3.85987e-05	0.0053144	yes	-	Exocyst complex component Sec6	EXOCYST COMPLEX COMPONENT SEC6-RELATED	-	GO:0000145|GO:0006887
151	gene-VFH_I440000	Vfaba.Hedin2.R1.1g440000.1	1532.63	-2.42701	0.589828	-4.11478	3.87556e-05	0.0053144	yes	-	Peroxidase	PEROXIDASE 72-RELATED	Heme-dependent peroxidases	GO:0004601|GO:0042744|GO:0006979|GO:0020037
152	gene-VFH_VI124360	Vfaba.Hedin2.R1.6g124360.1	365.185	2.77458	0.675402	4.10804	3.99029e-05	0.00540778	yes	LG6@110.0, LG6@110.0, qFB6.1	UDP-glucoronosyl and UDP-glucosyl transferase	GLYCOSYLTRANSFERASE	UDP-Glycosyltransferase/glycogen phosphorylase	GO:0008194
153	gene-VFH_II126720	Vfaba.Hedin2.R1.2g126720.1	133.382	-4.44092	1.08112	-4.10772	3.9959e-05	0.00540778	yes	LG2@102.1	Leucine rich repeat, Leucine rich repeat N-terminal domain, Protein tyrosine and serine/threonine kinase, Leucine Rich Repeat	OS05G0588300 PROTEIN	Protein kinase-like (PK-like), L domain-like	GO:0005524|GO:0005515|GO:0004672|GO:0006468
154	gene-VFH_III007720	Vfaba.Hedin2.R1.3g007720.1	12.1978	7.99417	1.94927	4.10111	4.1118e-05	0.0055285	yes	-	Glutathione S-transferase, N-terminal domain, Glutathione S-transferase, C-terminal domain	GLUTATHIONE S-TRANSFERASE, GST, SUPERFAMILY, GST DOMAIN CONTAINING, GLUTATHIONE S-TRANSFERASE, GST, SUPERFAMILY, GST DOMAIN CONTAINING	Thioredoxin-like, GST C-terminal domain-like	GO:0004364|GO:0006749
155	gene-VFH_IV002320	Vfaba.Hedin2.R1.4g002320.1	45.998	3.01643	0.735812	4.09946	4.1411e-05	0.00553197	yes	-	HD-ZIP protein N terminus, Homeobox associated leucine zipper, Homeodomain	HOMEOBOX-LEUCINE ZIPPER PROTEIN HAT14	Homeodomain-like	GO:0000981|GO:0006355|GO:0005634|GO:0003677|GO:0043565
156	gene-VFH_IV208440	Vfaba.Hedin2.R1.4g208440.1	129.125	5.25585	1.28345	4.0951	4.21994e-05	0.00558631	yes	-	NADH:flavin oxidoreductase / NADH oxidase family	NADH OXIDOREDUCTASE-RELATED	FMN-linked oxidoreductases	GO:0010181|GO:0016491
157	gene-VFH_IV210920	Vfaba.Hedin2.R1.4g210920.1	406.147	3.51769	0.85944	4.093	4.25825e-05	0.00558631	yes	-	Domain of unknown function (DUF4408), Cotton fibre expressed protein	COTTON FIBER (DUF761)	-	-
158	gene-VFH_IV207000	Vfaba.Hedin2.R1.4g207000.1	182.705	-1.44088	0.352056	-4.09276	4.26271e-05	0.00558631	yes	-	COQ9	UBIQUINONE BIOSYNTHESIS PROTEIN COQ9, MITOCHONDRIAL	-	GO:0006744|GO:0008289
159	gene-VFH_I132560	Vfaba.Hedin2.R1.1g132560.1	447.911	2.71209	0.663377	4.08831	4.34526e-05	0.0056536	yes	LG1@168.9	UDP-glucoronosyl and UDP-glucosyl transferase	GLUCOSYL/GLUCURONOSYL TRANSFERASES	UDP-Glycosyltransferase/glycogen phosphorylase	GO:0008194
160	gene-VFH_I007000	Vfaba.Hedin2.R1.1g007000.1	1434.33	-0.670408	0.164032	-4.08706	4.36866e-05	0.0056536	yes	-	ATP synthase (C/AC39) subunit	-	V-type ATP synthase subunit C	GO:0033179|GO:0046961|GO:1902600
161	gene-VFH_III006600	Vfaba.Hedin2.R1.3g006600.1	95.7466	1.37623	0.337426	4.07861	4.53055e-05	0.00577631	yes	-	1, 3-beta-glucan synthase subunit FKS1, domain-1, Vta1 like, 1, 3-beta-glucan synthase component	LYST-INTERACTING PROTEIN LIP5 DOPAMINE RESPONSIVE PROTEIN DRG-1	-	GO:0000148|GO:0003843|GO:0006075|GO:0016020
162	gene-VFH_V157640	Vfaba.Hedin2.R1.5g157640.1	153.504	3.35712	0.823119	4.07854	4.53194e-05	0.00577631	yes	-	MATH domain	TRAF-LIKE SUPERFAMILY PROTEIN, TRAF-LIKE SUPERFAMILY PROTEIN	TRAF domain-like	GO:0005515
163	gene-VFH_U051680	Vfaba.Hedin2.R1.Ung051680.2	1419.96	-1.09187	0.267805	-4.07711	4.55991e-05	0.00577631	yes	-	0	LOW-DENSITY RECEPTOR-LIKE PROTEIN		-
164	gene-VFH_II061920	Vfaba.Hedin2.R1.2g061920.1	1742.83	6.67393	1.63724	4.07634	4.57507e-05	0.00577631	yes	LG2@68.4, LG2@84.5	Lytic transglycolase, Expansin C-terminal domain	EXPANSIN-A15	Barwin-like endoglucanases, PHL pollen allergen	GO:0005576|GO:0009664
165	gene-VFH_V102320	Vfaba.Hedin2.R1.5g102320.1	189.341	-3.05817	0.75112	-4.07148	4.67146e-05	0.00586226	yes	-	Glutathione S-transferase, C-terminal domain, Glutathione S-transferase, N-terminal domain	GLUTATHIONE S-TRANSFERASE, GST, SUPERFAMILY, GST DOMAIN CONTAINING, GLUTATHIONE S-TRANSFERASE, GST, SUPERFAMILY, GST DOMAIN CONTAINING	Thioredoxin-like, GST C-terminal domain-like	GO:0004364|GO:0006749
166	gene-VFH_II159600	Vfaba.Hedin2.R1.2g159600.1	98.0186	1.77754	0.437729	4.06083	4.88994e-05	0.00609946	yes	LG2@102.1, LG2@169.8	Purine nucleobase transmembrane transport	OS09G0467300 PROTEIN-RELATED	Multidrug resistance efflux transporter EmrE	GO:0015211|GO:0016020
167	gene-VFH_IV204000	Vfaba.Hedin2.R1.4g204000.1	193.352	5.88324	1.45129	4.05381	5.03903e-05	0.00624232	yes	-	Jas motif, tify domain	PROTEIN TIFY 4A-RELATED-RELATED	-	-
168	gene-VFH_III024440	Vfaba.Hedin2.R1.3g024440.1	1165.98	-0.802223	0.197952	-4.05262	5.06477e-05	0.00624232	yes	LG3@24.7, LG3@27.7, LG3@28.4	EF hand, EF hand	CALCIUM-BINDING PROTEIN CML48-RELATED	EF-hand	GO:0005509
169	gene-VFH_III063520	Vfaba.Hedin2.R1.3g063520.1	596.798	2.66859	0.659339	4.04737	5.17965e-05	0.00634614	yes	LG3@75.2, LG3@119.2	STAS domain, Sulfate permease family	SULFATE TRANSPORTER	SpoIIaa-like	GO:0016020|GO:0008271|GO:0008272|GO:0055085
170	gene-VFH_IV142960	Vfaba.Hedin2.R1.4g142960.1	1296.49	-1.026	0.254205	-4.03612	5.43425e-05	0.00661892	yes	-	Transaldolase/Fructose-6-phosphate aldolase	TRANSALDOLASE	Aldolase	GO:0005975|GO:0004801|GO:0005737|GO:0006098
171	gene-VFH_II004320	Vfaba.Hedin2.R1.2g004320.1	294.85	4.06953	1.01027	4.02816	5.62157e-05	0.00680704	yes	-	Der1-like family	DER1-LIKE PROTEIN, DERLIN	Rhomboid-like	-
172	gene-VFH_I183840	Vfaba.Hedin2.R1.1g183840.1	1540.13	2.11302	0.525281	4.02264	5.75502e-05	0.0069097	yes	-	Glutathione S-transferase, C-terminal domain, Glutathione S-transferase, N-terminal domain	GLUTATHIONE S-TRANSFERASE, GST, SUPERFAMILY, GST DOMAIN CONTAINING, GLUTATHIONE S-TRANSFERASE, GST, SUPERFAMILY, GST DOMAIN CONTAINING	Thioredoxin-like, GST C-terminal domain-like	GO:0004364|GO:0006749
173	gene-VFH_U011000	Vfaba.Hedin2.R1.Ung011000.1	1095.14	3.49082	0.867954	4.0219	5.7731e-05	0.0069097	yes	-	Glutathione S-transferase, N-terminal domain	GLUTATHIONE S-TRANSFERASE, GST, SUPERFAMILY, GST DOMAIN CONTAINING		GO:0004364|GO:0006749
174	gene-VFH_V027120	Vfaba.Hedin2.R1.5g027120.1	1096.78	-0.91961	0.228919	-4.01719	5.88961e-05	0.00695206	yes	-	4Fe-4S dicluster domain, 2Fe-2S iron-sulfur cluster binding domain	SUCCINATE DEHYDROGENASE IRON-SULFUR PROTEIN	2Fe-2S ferredoxin-like, alpha-helical ferredoxin	GO:0009055|GO:0051536|GO:0006099|GO:0016491|GO:0051537
175	gene-VFH_I047640	Vfaba.Hedin2.R1.1g047640.1	150.88	1.80653	0.449784	4.01644	5.9085e-05	0.00695206	yes	LG1@168.9	Legume lectin domain, Protein kinase domain	-	Protein kinase-like (PK-like), Concanavalin A-like lectins/glucanases	GO:0004672|GO:0006468|GO:0005524|GO:0030246
176	gene-VFH_II150640	Vfaba.Hedin2.R1.2g150640.2	320.965	1.93326	0.481341	4.01641	5.90921e-05	0.00695206	yes	LG2@102.1	Transmembrane amino acid transporter protein	OS05G0424000 PROTEIN-RELATED	-	-
177	gene-VFH_III123360	Vfaba.Hedin2.R1.3g123360.1	1405.93	-2.16802	0.540292	-4.01267	6.00359e-05	0.00702319	yes	LG3@75.2, LG3@119.2, LG3@136.5	e3 binding domain, Biotin-requiring enzyme, 2-oxoacid dehydrogenases acyltransferase (catalytic domain)	DIHYDROLIPOAMIDE ACETYL/SUCCINYL-TRANSFERASE-RELATED	CoA-dependent acyltransferases, Single hybrid motif, Peripheral subunit-binding domain of 2-oxo acid dehydrogenase complex	GO:0016746|GO:0006086|GO:0045254
178	gene-VFH_IV198600	Vfaba.Hedin2.R1.4g198600.1	59.6034	4.53563	1.13104	4.01014	6.06836e-05	0.00705907	yes	-	-	-	-	-
179	gene-VFH_II230080	Vfaba.Hedin2.R1.2g230080.1	251.836	-1.00348	0.250704	-4.00267	6.26329e-05	0.00724513	yes	-	Pre-PUA-like domain, Translation initiation factor SUI1	EUKARYOTIC TRANSLATION INITIATION FACTOR 2D	PUA domain-like, eIF1-like, SWIB/MDM2 domain	GO:0001731|GO:0003743|GO:0006413
180	gene-VFH_I224920	Vfaba.Hedin2.R1.1g224920.1	299.437	-0.782291	0.19552	-4.00108	6.30535e-05	0.00725325	yes	-	Adaptor complexes medium subunit family	AP COMPLEX SUBUNIT MU	SNARE-like, Second domain of Mu2 adaptin subunit (ap50) of ap2 adaptor	GO:0006886|GO:0016192|GO:0030131
181	gene-VFH_V047640	Vfaba.Hedin2.R1.5g047640.1	84.2007	2.96328	0.743851	3.9837	6.78492e-05	0.00773384	yes	-	Dynein light chain type 1	DYNEIN LIGHT CHAIN	DLC	GO:0007017|GO:0030286
182	gene-VFH_II183360	Vfaba.Hedin2.R1.2g183360.1	107.357	-7.98931	2.00573	-3.98325	6.79783e-05	0.00773384	yes	-	Barwin family	WOUND-INDUCED PROTEIN WIN2	Barwin-like endoglucanases	GO:0004540|GO:0006952|GO:0042742|GO:0050832
183	gene-VFH_III197440	Vfaba.Hedin2.R1.3g197440.2	373.696	-1.0798	0.271693	-3.97433	7.05783e-05	0.00798576	yes	-	Mpv17 / PMP22 family	PEROXISOMAL MEMBRANE PROTEIN 2, PXMP2 MPV17	-	GO:0016020
184	gene-VFH_IV052960	Vfaba.Hedin2.R1.4g052960.1	2625.37	-1.56349	0.393588	-3.97241	7.11478e-05	0.00798727	yes	-	Dehydrogenase E1 component	PYRUVATE DEHYDROGENASE E1 COMPONENT, ALPHA SUBUNIT BACTERIAL AND ORGANELLAR	Thiamin diphosphate-binding fold (THDP-binding)	GO:0016624|GO:0004739|GO:0006086|GO:0043231
185	gene-VFH_VI118960	Vfaba.Hedin2.R1.6g118960.1	582.485	-0.950722	0.239374	-3.97169	7.13631e-05	0.00798727	yes	LG6@110.0, LG6@110.0, qFB6.1	Protein kinase domain	MITOGEN-ACTIVATED PROTEIN KINASE	Protein kinase-like (PK-like)	GO:0004672|GO:0006468|GO:0004707|GO:0005524
186	gene-VFH_III069800	Vfaba.Hedin2.R1.3g069800.1	121.531	-1.14475	0.288487	-3.96811	7.24454e-05	0.00803645	yes	LG3@75.2, LG3@119.2	Thioredoxin	THIOREDOXIN, MITOCHONDRIAL	Thioredoxin-like	-
187	gene-VFH_II245960	Vfaba.Hedin2.R1.2g245960.1	134.094	1.53985	0.388247	3.96617	7.30356e-05	0.00803645	yes	-	TIR domain, TIR domain, NB-ARC domain, NB-ARC domain	LEUCINE-RICH REPEAT-CONTAINING PROTEIN	P-loop containing nucleoside triphosphate hydrolases, P-loop containing nucleoside triphosphate hydrolases, Toll/Interleukin receptor TIR domain, Toll/Interleukin receptor TIR domain, L domain-like, Winged helix DNA-binding domain	GO:0006952|GO:0043531|GO:0007165
188	gene-VFH_VI131400	Vfaba.Hedin2.R1.6g131400.1	515.066	-1.155	0.291289	-3.96515	7.33488e-05	0.00803645	yes	LG6@121.0	Amino acid permease	POLYAMINE TRANSPORTER PUT1	-	GO:0016020|GO:0022857|GO:0055085
189	gene-VFH_U120320	Vfaba.Hedin2.R1.Ung120320.1	3726.19	-7.69122	1.93971	-3.96513	7.3355e-05	0.00803645	yes	-	Pathogenesis-related protein Bet v 1 family	-		GO:0004864|GO:0009738|GO:0010427|GO:0038023|GO:0006952
190	gene-VFH_VI181640	Vfaba.Hedin2.R1.6g181640.1	3217.81	-2.49325	0.630094	-3.95694	7.59152e-05	0.00827315	yes	-	Carbamoyl-phosphate synthase L chain, ATP binding domain, Biotin carboxylase C-terminal domain, Biotin carboxylase, N-terminal domain	PYRUVATE CARBOXYLASE SUBUNIT A	Glutathione synthetase ATP-binding domain-like, PreATP-grasp domain, Rudiment single hybrid motif	GO:0005524|GO:0046872|GO:0016874
191	gene-VFH_I084480	Vfaba.Hedin2.R1.1g084480.5	625.975	1.72829	0.43726	3.95255	7.73222e-05	0.00838237	yes	LG1@168.9	Malectin domain, Protein tyrosine and serine/threonine kinase	LEUCINE-RICH REPEAT-CONTAINING PROTEIN DDB_G0281931-RELATED	Protein kinase-like (PK-like), L domain-like	GO:0004672|GO:0005524|GO:0006468
192	gene-VFH_II028600	Vfaba.Hedin2.R1.2g028600.1	33.7158	-2.01759	0.511768	-3.94238	8.06762e-05	0.00870042	yes	LG2@10.7	Thioredoxin	THIOREDOXIN, MITOCHONDRIAL	Thioredoxin-like	-
193	gene-VFH_I440360	Vfaba.Hedin2.R1.1g440360.1	290.124	-5.36609	1.36386	-3.93449	8.33738e-05	0.00891886	yes	-	Peroxidase	PEROXIDASE 72-RELATED	Heme-dependent peroxidases	GO:0004601|GO:0042744|GO:0006979|GO:0020037
194	gene-VFH_V147080	Vfaba.Hedin2.R1.5g147080.1	143.1	4.21121	1.07048	3.93394	8.35632e-05	0.00891886	yes	-	Plant protein of unknown function	BNAC04G53230D PROTEIN	-	-
195	gene-VFH_IV235360	Vfaba.Hedin2.R1.4g235360.1	2101.35	2.20276	0.561401	3.92368	8.72059e-05	0.00925993	yes	-	Cyclophilin type peptidyl-prolyl cis-trans isomerase/CLD	PEPTIDYL-PROLYL CIS-TRANS ISOMERASE	Cyclophilin-like	GO:0003755|GO:0006457|GO:0000413
196	gene-VFH_V000600	Vfaba.Hedin2.R1.5g000600.1	34.0591	4.61918	1.17836	3.91999	8.85528e-05	0.00935497	yes	-	D-mannose binding lectin, Protein kinase domain	G-TYPE LECTIN S-RECEPTOR-LIKE SERINE/THREONINE-PROTEIN KINASE SD2-5	Protein kinase-like (PK-like), alpha-D-mannose-specific plant lectins	GO:0004674|GO:0004672|GO:0006468|GO:0005524
197	gene-VFH_V118960	Vfaba.Hedin2.R1.5g118960.1	24.8916	3.25728	0.834227	3.90455	9.44007e-05	0.00992214	yes	-	Probable lipid transfer	BIFUNCTIONAL INHIBITOR/LIPID-TRANSFER PROTEIN/SEED STORAGE 2S ALBUMIN SUPERFAMILY PROTEIN-RELATED, BIFUNCTIONAL INHIBITOR/LIPID-TRANSFER PROTEIN/SEED STORAGE 2S ALBUMIN SUPERFAMILY PROTEIN-RELATED	Bifunctional inhibitor/lipid-transfer protein/seed storage 2S albumin	-
198	gene-VFH_VI189760	Vfaba.Hedin2.R1.6g189760.2	267.501	-0.804431	0.206145	-3.90227	9.52964e-05	0.00992735	yes	qFB6.2	Peptidyl-tRNA hydrolase	PEPTIDYL-TRNA HYDROLASE	Peptidyl-tRNA hydrolase-like	GO:0004045
199	gene-VFH_II158000	Vfaba.Hedin2.R1.2g158000.1	65.2032	2.57552	0.660055	3.90198	9.54092e-05	0.00992735	yes	LG2@102.1, LG2@169.8	SBP domain	SQUAMOSA PROMOTER-BINDING-LIKE PROTEIN 4	SBT domain	GO:0003677|GO:0005634
200	gene-VFH_II101240	Vfaba.Hedin2.R1.2g101240.1	128.534	-9.60745	2.4637	-3.89961	9.63494e-05	0.00993771	yes	LG2@102.1	Hydrophobic seed protein	-	Bifunctional inhibitor/lipid-transfer protein/seed storage 2S albumin	-
201	gene-VFH_V162440	Vfaba.Hedin2.R1.5g162440.1	123.029	-2.34341	0.600981	-3.89931	9.64686e-05	0.00993771	yes	-	galactosyl transferase GMA12/MNN10 family	XYLOGLUCAN 6-XYLOSYLTRANSFERASE 5-RELATED-RELATED	-	GO:0016020|GO:0016757
202	gene-VFH_U115920	Vfaba.Hedin2.R1.Ung115920.1	1666.49	2.91402	0.747748	3.89707	9.7364e-05	0.00998029	yes	-	Alkaline and neutral invertase	-		GO:0005975|GO:0033926
203	gene-VFH_VI124320	Vfaba.Hedin2.R1.6g124320.1	930.137	1.75419	0.450514	3.89375	9.87049e-05	0.0100679	yes	LG6@110.0, LG6@110.0, qFB6.1	UDP-glucoronosyl and UDP-glucosyl transferase	GLYCOSYLTRANSFERASE	UDP-Glycosyltransferase/glycogen phosphorylase	GO:0008194
204	gene-VFH_U069480	Vfaba.Hedin2.R1.Ung069480.1	66.0173	-13.6884	3.52062	-3.88806	0.000101051	0.0102566	yes	-	SPX domain, SPX domain	SPX DOMAIN-CONTAINING PROTEIN 3		GO:0016036
205	gene-VFH_III173040	Vfaba.Hedin2.R1.3g173040.1	1248.07	4.61496	1.18795	3.88483	0.000102402	0.0103182	yes	-	Leucine rich repeat, Leucine rich repeat N-terminal domain, Protein kinase domain	LEUCINE RICH REPEAT KINASE 2	Protein kinase-like (PK-like), L domain-like, RNI-like, RNI-like	GO:0004672|GO:0006468|GO:0005524|GO:0005515
206	gene-VFH_I402080	Vfaba.Hedin2.R1.1g402080.1	27.3528	-4.45912	1.14801	-3.88423	0.000102654	0.0103182	yes	-	Integrase zinc binding domain	-	-	-
207	gene-VFH_VI088080	Vfaba.Hedin2.R1.6g088080.1	276.907	1.36955	0.352939	3.8804	0.000104284	0.0103421	yes	-	POT family	OLIGOPEPTIDE TRANSPORTER-RELATED	MFS general substrate transporter	GO:0006857|GO:0016020|GO:0022857|GO:0055085
208	gene-VFH_I076600	Vfaba.Hedin2.R1.1g076600.1	57.5663	-2.22002	0.572224	-3.87963	0.000104615	0.0103421	yes	LG1@168.9	MatE	MULTIDRUG RESISTANCE PROTEIN	-	GO:0015297|GO:0016020|GO:0042910|GO:0055085
209	gene-VFH_III111600	Vfaba.Hedin2.R1.3g111600.1	720.089	-1.29588	0.334062	-3.87918	0.00010481	0.0103421	yes	LG3@75.2, LG3@115.2, LG3@119.2, LG3@136.5	e3 binding domain, Biotin-requiring enzyme, Biotin-requiring enzyme, 2-oxoacid dehydrogenases acyltransferase (catalytic domain)	DIHYDROLIPOAMIDE ACETYL/SUCCINYL-TRANSFERASE-RELATED	CoA-dependent acyltransferases, Single hybrid motif, Single hybrid motif, Peripheral subunit-binding domain of 2-oxo acid dehydrogenase complex	GO:0006086|GO:0045254|GO:0004742|GO:0006090|GO:0016746
210	gene-VFH_IV217040	Vfaba.Hedin2.R1.4g217040.1	26.459	-6.73353	1.7359	-3.87899	0.00010489	0.0103421	yes	-	Leucine rich repeat	OS10G0469600 PROTEIN	L domain-like	GO:0005515
211	gene-VFH_V082640	Vfaba.Hedin2.R1.5g082640.1	4351.33	2.52154	0.651187	3.87222	0.000107848	0.0105834	yes	LG5@79.6, LG5@93.9, LG5@107.3	Light regulated protein Lir1	LIGHT-REGULATED PROTEIN 1, CHLOROPLASTIC	-	GO:0009507
212	gene-VFH_VI001600	Vfaba.Hedin2.R1.6g001600.1	347.239	-1.32711	0.342915	-3.87009	0.000108797	0.0106262	yes	-	Glutathione S-transferase, C-terminal domain, Glutathione S-transferase, N-terminal domain	MALEYLACETOACETATE ISOMERASE	Thioredoxin-like, GST C-terminal domain-like	GO:0003824|GO:0005737|GO:0009072
213	gene-VFH_IV180160	Vfaba.Hedin2.R1.4g180160.1	983.603	-1.1109	0.287328	-3.8663	0.000110501	0.0107065	yes	-	Purple acid Phosphatase, N-terminal domain, Iron/zinc purple acid phosphatase-like protein C, Calcineurin-like phosphoesterase	ACID PHOSPHATASE RELATED	Metallo-dependent phosphatases, Purple acid phosphatase, N-terminal domain	GO:0005515|GO:0016787|GO:0003993|GO:0046872
214	gene-VFH_I251560	Vfaba.Hedin2.R1.1g251560.1	21.9564	2.2869	0.591663	3.86521	0.000110992	0.0107065	yes	-	-	-	-	-
215	gene-VFH_VI185760	Vfaba.Hedin2.R1.6g185760.1	180.031	-8.7602	2.26739	-3.86356	0.000111748	0.0107065	yes	-	-	OS08G0516900 PROTEIN	-	-
216	gene-VFH_V131480	Vfaba.Hedin2.R1.5g131480.1	29.3168	-2.57121	0.665709	-3.86236	0.000112295	0.0107065	yes	-	RNA recognition motif. (a.k.a. RRM, RBD, or RNP domain)	NUCLEOLAR PROTEIN 8	RNA-binding domain, RBD	GO:0003723|GO:0003676
217	gene-VFH_VI038840	Vfaba.Hedin2.R1.6g038840.1	1963.87	-0.79496	0.205863	-3.8616	0.000112648	0.0107065	yes	-	AAA+ lid domain, FtsH Extracellular, Peptidase family M41, ATPase family associated with various cellular activities (AAA)	ATP-DEPENDENT PROTEASE	P-loop containing nucleoside triphosphate hydrolases, FtsH protease domain-like	GO:0004176|GO:0004222|GO:0005524|GO:0008270|GO:0016020|GO:0006508|GO:0016887
218	gene-VFH_III047480	Vfaba.Hedin2.R1.3g047480.1	17175.6	-1.48811	0.385377	-3.86144	0.000112721	0.0107065	yes	-	Pyridine nucleotide-disulphide oxidoreductase	APOPTOSIS-INDUCING FACTOR 1	FAD/NAD-linked reductases, dimerisation (C-terminal) domain, FAD/NAD(P)-binding domain, FAD/NAD(P)-binding domain	GO:0016491|GO:0050660
219	gene-VFH_III043880	Vfaba.Hedin2.R1.3g043880.1	3105.93	3.34169	0.866326	3.85731	0.000114642	0.0108392	yes	-	Thaumatin family	OS03G0233200 PROTEIN	Osmotin, thaumatin-like protein	-
220	gene-VFH_III006000	Vfaba.Hedin2.R1.3g006000.1	1239.85	-0.695091	0.180321	-3.85474	0.000115851	0.0109037	yes	-	Protein tyrosine and serine/threonine kinase	PTO-INTERACTING PROTEIN 1-LIKE	Protein kinase-like (PK-like)	GO:0004672|GO:0006468|GO:0005524|GO:0004713
221	gene-VFH_VI097440	Vfaba.Hedin2.R1.6g097440.1	16.9637	-2.90386	0.753765	-3.85247	0.000116933	0.0109557	yes	-	-	OS02G0753200 PROTEIN	-	-
222	gene-VFH_U072840	Vfaba.Hedin2.R1.Ung072840.1	551.875	-1.86061	0.483364	-3.84929	0.00011846	0.0110488	yes	-	Sugar (and other) transporter	SOLUTE CARRIER FAMILY 2, FACILITATED GLUCOSE TRANSPORTER		GO:0015144|GO:0016020|GO:0022857|GO:0055085
223	gene-VFH_I368560	Vfaba.Hedin2.R1.1g368560.1	16.3443	7.34943	1.91035	3.84717	0.000119489	0.0110948	yes	-	Protein kinase domain	CCR4-NOT TRANSCRIPTIONAL COMPLEX SUBUNIT CAF120-RELATED	Protein kinase-like (PK-like)	GO:0004672|GO:0006468|GO:0005524
224	gene-VFH_II118920	Vfaba.Hedin2.R1.2g118920.1	165.426	2.59151	0.674425	3.84254	0.000121767	0.0112558	yes	LG2@102.1	STAS domain, Sulfate permease family	SULFATE TRANSPORTER	SpoIIaa-like	GO:0008271|GO:0008272|GO:0016020|GO:0055085
225	gene-VFH_I122680	Vfaba.Hedin2.R1.1g122680.1	2263.74	-1.75635	0.457519	-3.83886	0.000123609	0.0113753	yes	LG1@168.9	Zinc finger, C3HC4 type (RING finger), Copine	COPINE FAMILY PROTEIN 1	RING/U-box, vWA-like	GO:0061630|GO:0070534
226	gene-VFH_VI132440	Vfaba.Hedin2.R1.6g132440.1	3003.24	-1.84076	0.479702	-3.8373	0.000124395	0.011397	yes	LG6@121.0	Tubulin C-terminal domain, Tubulin/FtsZ family, GTPase domain	TUBULIN	Tubulin C-terminal domain-like, Tubulin nucleotide-binding domain-like	GO:0005200|GO:0005525|GO:0005874|GO:0007017
227	gene-VFH_I346640	Vfaba.Hedin2.R1.1g346640.1	62.476	-2.02904	0.529911	-3.82902	0.000128653	0.0116935	yes	-	Cupin-like domain	HYPOXIA-INDUCIBLE FACTOR 1 ALPHA INHIBITOR-RELATED	Clavaminate synthase-like	-
228	gene-VFH_V023400	Vfaba.Hedin2.R1.5g023400.1	11.9804	4.49295	1.17346	3.82882	0.000128761	0.0116935	yes	-	Receptor family ligand binding region, Bacterial extracellular solute-binding proteins, family 3, Ligand-gated ion channel	IONOTROPIC GLUTAMATE RECEPTOR	Periplasmic binding protein-like II, Periplasmic binding protein-like I	GO:0015276|GO:0016020
229	gene-VFH_I096840	Vfaba.Hedin2.R1.1g096840.1	29.2919	-7.10199	1.856	-3.8265	0.000129977	0.0117524	yes	-	-	-	-	-
230	gene-VFH_II248080	Vfaba.Hedin2.R1.2g248080.1	23.6129	4.2357	1.1073	3.82526	0.000130634	0.0117605	yes	-	Galactose oxidase-like, Early set domain, Glyoxal oxidase N-terminus	SECRETED PROTEIN-RELATED	E set domains, Galactose oxidase, central domain	-
231	gene-VFH_IV212440	Vfaba.Hedin2.R1.4g212440.1	115.977	-8.10384	2.12051	-3.82165	0.00013256	0.0118822	yes	-	Membrane transport protein	AUXIN EFFLUX CARRIER COMPONENT 1B-RELATED	-	GO:0016020|GO:0055085
232	gene-VFH_II264320	Vfaba.Hedin2.R1.2g264320.1	1908.7	-1.19173	0.312229	-3.81686	0.000135159	0.012063	yes	-	Aconitase C-terminal domain	3-ISOPROPYLMALATE DEHYDRATASE SMALL SUBUNIT 2-RELATED-RELATED	LeuD/IlvD-like	GO:0016836
233	gene-VFH_I390560	Vfaba.Hedin2.R1.1g390560.1	842.351	-1.76648	0.463348	-3.81243	0.000137605	0.0122285	yes	-	Alpha/beta hydrolase family	2-SUCCINYL-6-HYDROXY-2, 4-CYCLOHEXADIENE-1-CARBOXYLATE SYNTHASE	alpha/beta-Hydrolases	-
234	gene-VFH_I259800	Vfaba.Hedin2.R1.1g259800.1	175.313	-4.56709	1.19921	-3.80842	0.000139856	0.0123755	yes	-	Leucine rich repeat, Leucine rich repeat, Leucine rich repeat N-terminal domain	UNNAMED PRODUCT	L domain-like, L domain-like, L domain-like, RNI-like	GO:0005515
235	gene-VFH_II229240	Vfaba.Hedin2.R1.2g229240.1	68.5804	-7.53551	1.97938	-3.807	0.000140662	0.0123938	yes	-	Ras family	RHO FAMILY GTPASE	P-loop containing nucleoside triphosphate hydrolases	GO:0005525|GO:0007264|GO:0003924
236	gene-VFH_IV175240	Vfaba.Hedin2.R1.4g175240.1	513.849	2.26541	0.595392	3.8049	0.00014186	0.0124464	yes	-	POT family	OLIGOPEPTIDE TRANSPORTER-RELATED	MFS general substrate transporter	GO:0006857|GO:0016020|GO:0022857|GO:0055085
237	gene-VFH_IV163120	Vfaba.Hedin2.R1.4g163120.1	362.389	3.02954	0.796705	3.80258	0.000143197	0.0124625	yes	-	TCP family transcription factor	TRANSCRIPTION FACTOR TCP4-RELATED	-	GO:0003700
238	gene-VFH_III038400	Vfaba.Hedin2.R1.3g038400.1	10.735	-7.00989	1.8435	-3.80249	0.000143247	0.0124625	yes	LG3@24.7, LG3@28.4	HYPK UBA domain, Ulp1 protease family, C-terminal catalytic domain	HUNTINGTIN-INTERACTING PROTEIN K FAMILY MEMBER	Cysteine proteinases	GO:0006508|GO:0008234
239	gene-VFH_VI174320	Vfaba.Hedin2.R1.6g174320.1	28.965	2.60363	0.686947	3.79015	0.000150555	0.0130435	yes	LG6@169.6	LURP-one-related	-	Tubby C-terminal domain-like	-
240	gene-VFH_I028880	Vfaba.Hedin2.R1.1g028880.1	198.827	5.48712	1.44918	3.78636	0.000152868	0.0131887	yes	-	Glycosyl hydrolase family 1	GLYCOSYL HYDROLASE	(Trans)glycosidases	GO:0004553|GO:0005975
241	gene-VFH_V160280	Vfaba.Hedin2.R1.5g160280.1	1957.71	0.932251	0.246668	3.77938	0.000157218	0.0135077	yes	-	Protein of unknown function, DUF255	SPERMATOGENESIS-ASSOCIATED PROTEIN 20	Thioredoxin-like, Six-hairpin glycosidases	GO:0005975
242	gene-VFH_U053280	Vfaba.Hedin2.R1.Ung053280.1	4246.35	-2.213	0.586276	-3.77468	0.000160216	0.013616	yes	-	Beta-ketoacyl synthase, N-terminal domain, Beta-ketoacyl synthase, C-terminal domain	POLYKETIDE SYNTHASE-RELATED		GO:0004315|GO:0006633|GO:0016747|GO:0016746
243	gene-VFH_VI122840	Vfaba.Hedin2.R1.6g122840.1	29.5272	-6.70537	1.77643	-3.77464	0.000160241	0.013616	yes	LG6@110.0, LG6@110.0, qFB6.1	-	UNCHARACTERIZED	PLC-like phosphodiesterases	GO:0006629|GO:0008081
244	gene-VFH_I028080	Vfaba.Hedin2.R1.1g028080.1	81.3576	-8.55895	2.26769	-3.77431	0.000160451	0.013616	yes	-	non-haem dioxygenase in morphine synthesis N-terminal, 2OG-Fe(II) oxygenase superfamily	OXOGLUTARATE/IRON-DEPENDENT DIOXYGENASE	Clavaminate synthase-like	-
245	gene-VFH_II223240	Vfaba.Hedin2.R1.2g223240.1	22.6249	-7.11811	1.88743	-3.77132	0.000162389	0.0137242	yes	-	-	-	-	-
246	gene-VFH_III185600	Vfaba.Hedin2.R1.3g185600.1	234.486	2.65642	0.705359	3.76605	0.000165851	0.0139598	yes	-	Pathogenesis-related protein Bet v 1 family	POLYKETIDE CYCLASE/DEHYDRASE AND LIPID TRANSPORT SUPERFAMILY PROTEIN, POLYKETIDE CYCLASE/DEHYDRASE AND LIPID TRANSPORT SUPERFAMILY PROTEIN	Bet v1-like	GO:0006952
247	gene-VFH_I369200	Vfaba.Hedin2.R1.1g369200.2	322.126	2.04471	0.543433	3.76258	0.000168169	0.0140862	yes	-	AP2 domain, AP2 domain	AP2-LIKE ETHYLENE-RESPONSIVE TRANSCRIPTION FACTOR	DNA-binding domain, DNA-binding domain	GO:0003677|GO:0003700|GO:0006355
248	gene-VFH_II226680	Vfaba.Hedin2.R1.2g226680.1	41.8924	-8.48103	2.25453	-3.76177	0.000168713	0.0140862	yes	-	Transcription factor DP, E2F/DP family winged-helix DNA-binding domain	TRANSCRIPTION FACTOR DP	Winged helix DNA-binding domain, E2F-DP heterodimerization region	GO:0005667|GO:0006355|GO:0051726
249	gene-VFH_II219000	Vfaba.Hedin2.R1.2g219000.1	556.931	3.76604	1.00284	3.75539	0.000173071	0.014392	yes	-	Cytochrome P450	CYTOCHROME P450 FAMILY MEMBER	Cytochrome P450	GO:0005506|GO:0016705|GO:0004497|GO:0020037
250	gene-VFH_II069720	Vfaba.Hedin2.R1.2g069720.1	31.8831	-7.49832	1.99959	-3.74992	0.000176892	0.0146287	yes	-	-	-	-	-
251	gene-VFH_I276960	Vfaba.Hedin2.R1.1g276960.1	364.68	-3.42261	0.912868	-3.7493	0.000177331	0.0146287	yes	-	Glycerophosphoryl diester phosphodiesterase family, Glycerophosphoryl diester phosphodiesterase family	GLYCEROPHOSPHORYL DIESTER PHOSPHODIESTERASE	PLC-like phosphodiesterases, PLC-like phosphodiesterases	GO:0006629|GO:0008081
252	gene-VFH_IV046600	Vfaba.Hedin2.R1.4g046600.1	661.82	5.04518	1.35164	3.73265	0.000189478	0.0155688	yes	-	-	GB|AAF24581.1	-	-
253	gene-VFH_II056960	Vfaba.Hedin2.R1.2g056960.1	325.229	-4.31417	1.15699	-3.72878	0.000192408	0.0157471	yes	LG2@84.5	Glutamine amidotransferase domain, Asparagine synthase	ASPARAGINE SYNTHETASE	N-terminal nucleophile aminohydrolases (Ntn hydrolases), Adenine nucleotide alpha hydrolases-like	GO:0004066|GO:0006529
254	gene-VFH_V196960	Vfaba.Hedin2.R1.5g196960.1	31.0244	4.22942	1.13461	3.72764	0.000193279	0.015756	yes	-	Response regulator receiver domain	TWO-COMPONENT RESPONSE REGULATOR	CheY-like	GO:0009736|GO:0000160
255	gene-VFH_I105120	Vfaba.Hedin2.R1.1g105120.1	760.111	-1.41254	0.379497	-3.72213	0.000197552	0.0160412	yes	LG1@168.9	Major Facilitator Superfamily	INNER MEMBRANE TRANSPORT PROTEIN YAJR	MFS general substrate transporter	GO:0022857|GO:0055085
256	gene-VFH_III170120	Vfaba.Hedin2.R1.3g170120.1	634.714	-1.78756	0.480826	-3.71768	0.000201061	0.0162624	yes	-	2Fe-2S iron-sulfur cluster binding domain	FERREDOXIN	2Fe-2S ferredoxin-like	GO:0051536|GO:0009055|GO:0022900|GO:0051537
257	gene-VFH_IV163920	Vfaba.Hedin2.R1.4g163920.1	1893.9	-1.99267	0.537063	-3.71031	0.000207007	0.0166436	yes	-	lactate/malate dehydrogenase, alpha/beta C-terminal domain, lactate/malate dehydrogenase, NAD binding domain	MALATE AND LACTATE DEHYDROGENASE	LDH C-terminal domain-like, NAD(P)-binding Rossmann-fold domains	GO:0016491|GO:0006099|GO:0030060|GO:0016616|GO:0003824
258	gene-VFH_U078280	Vfaba.Hedin2.R1.Ung078280.1	20.9671	5.58108	1.50469	3.70913	0.000207969	0.0166436	yes	-	Apocytochrome F, C-terminal, Apocytochrome F, N-terminal			GO:0005506|GO:0009055|GO:0015979|GO:0020037|GO:0042651
259	gene-VFH_V033320	Vfaba.Hedin2.R1.5g033320.1	1083.65	-0.940737	0.253705	-3.70799	0.000208908	0.0166436	yes	-	Family of unknown function (DUF716)	PROTEINASE INHIBITOR I4, SERPIN (DUF716)-RELATED	-	-
260	gene-VFH_I232600	Vfaba.Hedin2.R1.1g232600.1	105.361	-3.89646	1.05085	-3.70789	0.00020899	0.0166436	yes	-	Cytochrome P450	TRANS-CINNAMATE 4-MONOOXYGENASE	Cytochrome P450	GO:0005506|GO:0016705|GO:0004497|GO:0020037
261	gene-VFH_III230440	Vfaba.Hedin2.R1.3g230440.1	2412.88	1.1122	0.300068	3.70651	0.000210137	0.0166709	yes	-	Leucine rich repeat, Leucine rich repeat N-terminal domain, Protein tyrosine and serine/threonine kinase, Leucine Rich Repeat, Leucine Rich Repeat	LEUCINE-RICH REPEAT RECEPTOR-LIKE PROTEIN KINASE FAMILY PROTEIN-RELATED	Protein kinase-like (PK-like), L domain-like	GO:0004672|GO:0005524|GO:0006468|GO:0005515
262	gene-VFH_II232880	Vfaba.Hedin2.R1.2g232880.1	19.2894	7.38447	1.99519	3.70113	0.000214643	0.01696	yes	-	2OG-Fe(II) oxygenase superfamily	ALKYLATED DNA REPAIR PROTEIN ALKB-RELATED	Clavaminate synthase-like	-
263	gene-VFH_I282000	Vfaba.Hedin2.R1.1g282000.1	89.724	4.91733	1.32893	3.70021	0.000215419	0.01696	yes	-	Leucine rich repeat, Leucine rich repeat, Leucine rich repeat, Leucine rich repeat N-terminal domain, Leucine Rich Repeat, Leucine Rich Repeat	LEUCINE-RICH REPEAT RECEPTOR PROTEIN KINASE EMS1-LIKE-RELATED	L domain-like, L domain-like, RNI-like	GO:0005515
264	gene-VFH_VI140880	Vfaba.Hedin2.R1.6g140880.1	3462.66	-0.702734	0.19011	-3.69645	0.000218634	0.0170944	yes	LG6@121.0	GDP dissociation inhibitor	RAB GDP-DISSOCIATION INHIBITOR	FAD-linked reductases, C-terminal domain, FAD/NAD(P)-binding domain, FAD/NAD(P)-binding domain	GO:0005093|GO:0015031|GO:0005092|GO:0007264
265	gene-VFH_I347440	Vfaba.Hedin2.R1.1g347440.1	2035.1	-0.834433	0.225749	-3.69628	0.000218778	0.0170944	yes	-	Pyridine nucleotide-disulphide oxidoreductase	THIOREDOXIN REDUCTASE 1-RELATED-RELATED	FAD/NAD(P)-binding domain	GO:0004791|GO:0005737|GO:0019430|GO:0016491
266	gene-VFH_I025080	Vfaba.Hedin2.R1.1g025080.1	180.064	5.1323	1.39037	3.69133	0.000223087	0.0173558	yes	-	BAG domain, IQ calmodulin-binding motif	BAG DOMAIN CONTAINING PROTEIN, EXPRESSED	BAG domain	GO:0005515|GO:0051087
267	gene-VFH_II003400	Vfaba.Hedin2.R1.2g003400.1	152.071	-14.8312	4.01874	-3.69052	0.0002238	0.0173558	yes	-	Plant invertase/pectin methylesterase inhibitor	PECTINESTERASE INHIBITOR-LIKE	Plant invertase/pectin methylesterase inhibitor	GO:0004857
268	gene-VFH_V125680	Vfaba.Hedin2.R1.5g125680.1	1296.96	-0.702707	0.190716	-3.68457	0.000229089	0.0176997	yes	-	V-ATPase subunit H, V-ATPase subunit H	V-TYPE PROTON ATPASE SUBUNIT H	ARM repeat	GO:0005515|GO:0000221|GO:1902600|GO:0046961
269	gene-VFH_VI062680	Vfaba.Hedin2.R1.6g062680.1	1491.49	-7.57485	2.05802	-3.68066	0.000232633	0.0179067	yes	-	Multicopper oxidase, Multicopper oxidase, Multicopper oxidase	MULTI-COPPER OXIDASE	Cupredoxins, Cupredoxins, Cupredoxins	GO:0005507|GO:0016491
270	gene-VFH_II218960	Vfaba.Hedin2.R1.2g218960.1	520.162	3.78826	1.0306	3.6758	0.000237107	0.0181835	yes	-	Cytochrome P450	CYTOCHROME P450 FAMILY MEMBER	Cytochrome P450	GO:0004497|GO:0005506|GO:0016705|GO:0020037
271	gene-VFH_V178560	Vfaba.Hedin2.R1.5g178560.1	442.695	2.05318	0.559171	3.67182	0.000240827	0.0183786	yes	-	-	LD22376P	-	-
272	gene-VFH_I379400	Vfaba.Hedin2.R1.1g379400.1	67.511	3.35082	0.912735	3.67119	0.000241426	0.0183786	yes	-	HD-ZIP protein N terminus, Homeobox associated leucine zipper, Homeodomain	HOMEOBOX-LEUCINE ZIPPER PROTEIN HAT14	Homeodomain-like	GO:0005634|GO:0000981|GO:0006355|GO:0003677|GO:0043565
273	gene-VFH_I115160	Vfaba.Hedin2.R1.1g115160.1	1561.36	-2.20395	0.6007	-3.66897	0.000243532	0.018471	yes	LG1@168.9	Pyruvate kinase, alpha/beta domain, Pyruvate kinase, barrel domain	PYRUVATE KINASE	PK C-terminal domain-like, Phosphoenolpyruvate/pyruvate domain, PK beta-barrel domain-like	GO:0003824|GO:0000287|GO:0004743|GO:0006096|GO:0030955
274	gene-VFH_VI046120	Vfaba.Hedin2.R1.6g046120.1	243.876	4.92534	1.34388	3.665	0.000247339	0.0186913	yes	-	Rx N-terminal domain, NB-ARC domain	DISEASE RESISTANCE PROTEIN RP	P-loop containing nucleoside triphosphate hydrolases, L domain-like	GO:0043531|GO:0006952
275	gene-VFH_U101960	Vfaba.Hedin2.R1.Ung101960.1	142.137	-2.2817	0.62315	-3.66156	0.000250688	0.0188302	yes	-	MatE, MatE	MULTIDRUG RESISTANCE PROTEIN		GO:0015297|GO:0016020|GO:0042910|GO:0055085|GO:1990961
276	gene-VFH_I406560	Vfaba.Hedin2.R1.1g406560.1	252.67	-2.21548	0.605118	-3.66124	0.000250996	0.0188302	yes	-	Domain of unknown function (DUF4217), Helicase conserved C-terminal domain, DEAD/DEAH box helicase	RNA HELICASE	P-loop containing nucleoside triphosphate hydrolases	GO:0003724|GO:0003676|GO:0005524
277	gene-VFH_IV081560	Vfaba.Hedin2.R1.4g081560.1	44.9657	2.63703	0.721498	3.65494	0.000257246	0.0192294	yes	-	3-beta hydroxysteroid dehydrogenase/isomerase family	NAD DEPENDENT EPIMERASE/DEHYDRATASE	NAD(P)-binding Rossmann-fold domains	GO:0003854|GO:0006694|GO:0016616
278	gene-VFH_I370440	Vfaba.Hedin2.R1.1g370440.1	224.388	3.70021	1.01327	3.65174	0.000260465	0.0193149	yes	-	Cytochrome P450	CYTOCHROME P450 82C3-RELATED	Cytochrome P450	GO:0005506|GO:0016705|GO:0004497|GO:0020037
279	gene-VFH_II169880	Vfaba.Hedin2.R1.2g169880.1	1421.6	-0.632895	0.173358	-3.6508	0.000261421	0.0193149	yes	LG2@102.1, LG2@169.8, LG2@171.4	Phosphoribosyl transferase domain	ADENINE PHOSPHORIBOSYLTRANSFERASE	PRTase-like	GO:0003999|GO:0005737|GO:0006168
280	gene-VFH_VI055160	Vfaba.Hedin2.R1.6g055160.1	7444.64	2.57713	0.705909	3.65079	0.000261431	0.0193149	yes	-	PLAT/LH2 domain, Lipoxygenase, Lipoxygenase	LIPOXYGENASE	Lipase/lipooxygenase domain (PLAT/LH2 domain), Lipoxigenase	GO:0016491|GO:0016702|GO:0046872|GO:0005515|GO:0034440
281	gene-VFH_V027640	Vfaba.Hedin2.R1.5g027640.1	56.5772	4.75107	1.30162	3.65012	0.000262121	0.0193149	yes	-	F-box-like	BNAA05G37150D PROTEIN-RELATED	F-box domain	GO:0005515
282	gene-VFH_I332360	Vfaba.Hedin2.R1.1g332360.1	2873.67	-1.28724	0.352794	-3.64872	0.000263554	0.0193516	yes	-	Reversibly glycosylated polypeptide	UDP-ARABINOSE MUTASE	Nucleotide-diphospho-sugar transferases	GO:0016866|GO:0071669
283	gene-VFH_VI131720	Vfaba.Hedin2.R1.6g131720.1	564.932	-1.98573	0.544415	-3.64746	0.000264846	0.0193777	yes	LG6@121.0	AMP-binding enzyme	ACYL-ACTIVATING ENZYME 17, PEROXISOMAL-RELATED	Acetyl-CoA synthetase-like	-
284	gene-VFH_I034320	Vfaba.Hedin2.R1.1g034320.1	250.583	-8.13127	2.22986	-3.64655	0.000265789	0.0193783	yes	-	Lytic transglycolase, Expansin C-terminal domain	EXPANSIN-A15	Barwin-like endoglucanases, PHL pollen allergen	GO:0009664|GO:0005576
285	gene-VFH_V179720	Vfaba.Hedin2.R1.5g179720.1	822.011	-0.830984	0.228039	-3.64404	0.000268395	0.0194996	yes	-	Galactose oxidase, central domain, Galactose oxidase, central domain, Kelch motif, Acyl CoA binding protein	ACYL-COA-BINDING DOMAIN-CONTAINING PROTEIN 5	Acyl-CoA binding protein, Kelch motif	GO:0000062|GO:0005515
286	gene-VFH_IV057440	Vfaba.Hedin2.R1.4g057440.1	1371.27	3.16136	0.868568	3.63974	0.000272914	0.0197586	yes	-	Jas motif, tify domain	PROTEIN TIFY 4A-RELATED-RELATED	-	-
287	gene-VFH_II048160	Vfaba.Hedin2.R1.2g048160.1	1800.73	-0.702532	0.193163	-3.637	0.000275832	0.0198985	yes	LG2@10.7, LG2@50.1	Anticodon-binding domain of tRNA ligase, tRNA synthetases class I (I, L, M and V), tRNA synthetases class I (I, L, M and V)	LEUCYL-TRNA SYNTHETASE	Nucleotidylyl transferase, ValRS/IleRS/LeuRS editing domain, Anticodon-binding domain of a subclass of class I aminoacyl-tRNA synthetases	GO:0002161|GO:0006418|GO:0004812|GO:0000166|GO:0005524|GO:0004823|GO:0006429
288	gene-VFH_I246840	Vfaba.Hedin2.R1.1g246840.2	133.092	2.56521	0.705478	3.63613	0.000276768	0.0198985	yes	-	Transmembrane amino acid transporter protein	OS05G0424000 PROTEIN-RELATED	-	-
289	gene-VFH_VI036040	Vfaba.Hedin2.R1.6g036040.1	614.076	2.09891	0.577606	3.6338	0.000279277	0.0199314	yes	-	GRAS domain family	OSJNBA0084A10.13 PROTEIN-RELATED	-	-
290	gene-VFH_IV209680	Vfaba.Hedin2.R1.4g209680.1	335.656	4.07202	1.12078	3.6332	0.000279933	0.0199314	yes	-	DDE superfamily endonuclease	UNCHARACTERIZED	-	-
291	gene-VFH_VI086320	Vfaba.Hedin2.R1.6g086320.1	380.645	-8.05016	2.21602	-3.63271	0.000280463	0.0199314	yes	-	Ribosomal S17	40S RIBOSOMAL PROTEIN S17	Rps17e-like	GO:0003735|GO:0005840|GO:0006412
292	gene-VFH_I054360	Vfaba.Hedin2.R1.1g054360.1	30.578	2.66781	0.734499	3.63214	0.000281076	0.0199314	yes	LG1@168.9	Plant PDR ABC transporter associated, ABC-2 type transporter	PLEIOTROPIC DRUG RESISTANCE PROTEIN 1-LIKE ISOFORM X1	-	GO:0016020|GO:0140359
293	gene-VFH_VI098960	Vfaba.Hedin2.R1.6g098960.1	133.186	6.41168	1.76601	3.6306	0.000282766	0.0199523	yes	-	ABC-2 type transporter, ABC-2 type transporter, ABC transporter	ABC TRANSPORTER G FAMILY MEMBER 11	P-loop containing nucleoside triphosphate hydrolases	GO:0005524|GO:0016020|GO:0140359|GO:0016887
294	gene-VFH_I480560	Vfaba.Hedin2.R1.1g480560.1	2091.32	2.1616	0.595462	3.63011	0.000283298	0.0199523	yes	-	Aldolase/RraA	4-HYDROXY-4-METHYL-2-OXOGLUTARATE ALDOLASE 3-RELATED	RraA-like	GO:0008428|GO:0051252
295	gene-VFH_I136320	Vfaba.Hedin2.R1.1g136320.1	19.3704	4.8608	1.34295	3.6195	0.000295171	0.020718	yes	LG1@168.9	Homeobox associated leucine zipper, Homeodomain	HOMEOBOX-LEUCINE ZIPPER PROTEIN	Homeodomain-like	GO:0006355|GO:0043565|GO:0000981|GO:0003700|GO:0003677
296	gene-VFH_III173320	Vfaba.Hedin2.R1.3g173320.1	498.304	4.64127	1.28283	3.61801	0.000296878	0.0207674	yes	-	Leucine rich repeat, Leucine rich repeat, Leucine rich repeat N-terminal domain, Protein kinase domain	LEUCINE RICH REPEAT KINASE 2	Protein kinase-like (PK-like), L domain-like, RNI-like	GO:0005515|GO:0005524|GO:0004672|GO:0006468
297	gene-VFH_II236800	Vfaba.Hedin2.R1.2g236800.1	114.225	6.38616	1.76705	3.61402	0.000301485	0.0210187	yes	-	Albumin I chain a	-	-	-
298	gene-VFH_VI010880	Vfaba.Hedin2.R1.6g010880.1	2887.81	1.1175	0.30967	3.60868	0.000307762	0.0213843	yes	-	Leucine rich repeat, Leucine Rich repeat	NISCHARIN RELATED	Outer arm dynein light chain 1	GO:0005515
299	gene-VFH_III040720	Vfaba.Hedin2.R1.3g040720.1	71.9328	3.15837	0.875427	3.6078	0.000308803	0.0213849	yes	-	Eukaryotic-type carbonic anhydrase	CARBONIC ANHYDRASE	Carbonic anhydrase	GO:0004089|GO:0008270
300	gene-VFH_IV014880	Vfaba.Hedin2.R1.4g014880.1	10.005	-5.69671	1.57938	-3.60693	0.000309836	0.0213849	yes	-	Plant transposase (Ptta/En/Spm family)	OS10G0409366 PROTEIN-RELATED	-	-
301	gene-VFH_IV125320	Vfaba.Hedin2.R1.4g125320.1	516.467	2.95908	0.821139	3.60363	0.000313806	0.0215869	yes	-	Protein kinase domain	CCR4-NOT TRANSCRIPTIONAL COMPLEX SUBUNIT CAF120-RELATED	Protein kinase-like (PK-like)	GO:0004672|GO:0005524|GO:0006468
302	gene-VFH_III058920	Vfaba.Hedin2.R1.3g058920.1	1885.69	-1.38159	0.383494	-3.60264	0.000314998	0.0215972	yes	-	Ribosomal protein L21e	60S RIBOSOMAL PROTEIN L21	Translation proteins SH3-like domain	GO:0003735|GO:0005840|GO:0006412
303	gene-VFH_IV021040	Vfaba.Hedin2.R1.4g021040.1	57.8773	-1.88752	0.524399	-3.59939	0.000318967	0.0217971	yes	-	FAE1/Type III polyketide synthase-like protein	3-KETOACYL-COA SYNTHASE	Thiolase-like	GO:0016746|GO:0006633|GO:0016020|GO:0016747
304	gene-VFH_I189080	Vfaba.Hedin2.R1.1g189080.1	615.308	-1.32356	0.367864	-3.59796	0.000320722	0.021845	yes	-	Ribosomal silencing factor during starvation	IOJAP SUPERFAMILY ORTHOLOG, IOJAP SUPERFAMILY ORTHOLOG	Nucleotidyltransferase	-
305	gene-VFH_V064880	Vfaba.Hedin2.R1.5g064880.1	9.29698	-7.6085	2.11742	-3.5933	0.000326521	0.0221671	yes	LG5@79.6, LG5@86.9, LG5@93.9	VIT family	FE(2+)/MN(2+) TRANSPORTER PCL1	-	GO:0005384|GO:0030026
306	gene-VFH_I323760	Vfaba.Hedin2.R1.1g323760.1	113.382	2.6361	0.734252	3.59019	0.000330441	0.0223599	yes	-	Dof domain, zinc finger	CYCLIC DOF FACTOR 2	-	GO:0003677|GO:0006355|GO:0003700
307	gene-VFH_I204160	Vfaba.Hedin2.R1.1g204160.1	34.6318	-2.5144	0.701301	-3.58533	0.000336651	0.0227058	yes	-	EamA-like transporter family, EamA-like transporter family	WAT1-RELATED PROTEIN	Multidrug resistance efflux transporter EmrE	GO:0016020|GO:0022857
308	gene-VFH_V027320	Vfaba.Hedin2.R1.5g027320.1	116.375	-4.10787	1.14636	-3.5834	0.000339153	0.0228004	yes	-	-	PROTEIN THI031, PUTATIVE-RELATED	-	-
309	gene-VFH_IV211680	Vfaba.Hedin2.R1.4g211680.1	38.1118	4.99416	1.39659	3.57597	0.00034893	0.0233817	yes	-	-	-	-	-
310	gene-VFH_II025680	Vfaba.Hedin2.R1.2g025680.2	920.27	-0.714499	0.199886	-3.57453	0.000350862	0.0234353	yes	LG2@10.7	Leo1-like protein	LEO1 PROTEIN	-	GO:0006368|GO:0016570|GO:0016593
311	gene-VFH_I132480	Vfaba.Hedin2.R1.1g132480.1	79.2329	3.26389	0.913839	3.57162	0.000354778	0.0235677	yes	LG1@168.9	UDP-glucoronosyl and UDP-glucosyl transferase	GLUCOSYL/GLUCURONOSYL TRANSFERASES	UDP-Glycosyltransferase/glycogen phosphorylase	GO:0008194
312	gene-VFH_II187960	Vfaba.Hedin2.R1.2g187960.1	47.7742	-5.35532	1.49951	-3.57137	0.000355121	0.0235677	yes	-	-	EXPRESSED PROTEIN	-	-
313	gene-VFH_III125160	Vfaba.Hedin2.R1.3g125160.1	222.361	-1.17179	0.328321	-3.56904	0.000358287	0.0237019	yes	LG3@75.2, LG3@119.2, LG3@136.5	Phosphatidylinositol-4-phosphate 5-Kinase, TCP-1/cpn60 chaperonin family	1-PHOSPHATIDYLINOSITOL 3-PHOSPHATE 5-KINASE-RELATED	SAICAR synthase-like, GroEL apical domain-like	GO:0000285|GO:0016307|GO:0046488|GO:0005524
314	gene-VFH_I218320	Vfaba.Hedin2.R1.1g218320.1	2950.76	-1.62134	0.454585	-3.56663	0.000361597	0.023772	yes	qFB1.3	Phosphoglucose isomerase, Phosphoglucose isomerase	GLUCOSE-6-PHOSPHATE ISOMERASE	SIS domain	GO:0097367|GO:1901135|GO:0004347|GO:0006094|GO:0006096
315	gene-VFH_I100400	Vfaba.Hedin2.R1.1g100400.1	21.9332	-7.82753	2.19468	-3.5666	0.000361643	0.023772	yes	LG1@168.9	Guanine nucleotide exchange factor in Golgi transport N-terminal	GUANYL-NUCLEOTIDE EXCHANGE FACTOR	-	-
316	gene-VFH_III177280	Vfaba.Hedin2.R1.3g177280.1	206.04	-3.4312	0.962445	-3.56509	0.000363733	0.0238337	yes	-	Exostosin family	EXOSTOSIN HEPARAN SULFATE GLYCOSYLTRANSFERASE -RELATED	-	GO:0006486|GO:0016757
317	gene-VFH_I231960	Vfaba.Hedin2.R1.1g231960.1	12.267	5.29755	1.48677	3.56313	0.000366465	0.023937	yes	-	-	CYTOCHROME P450 FAMILY 71 PROTEIN	Cytochrome P450	GO:0004497|GO:0005506|GO:0016705|GO:0020037
318	gene-VFH_I467760	Vfaba.Hedin2.R1.1g467760.1	123.097	-2.37206	0.666091	-3.56116	0.000369213	0.0240406	yes	-	Cathepsin propeptide inhibitor domain (I29), Granulin, Papain family cysteine protease	CYSTEINE PROTEASE FAMILY C1-RELATED	Granulin repeat, Cysteine proteinases	GO:0006508|GO:0008234
319	gene-VFH_I274960	Vfaba.Hedin2.R1.1g274960.1	25353.5	1.34356	0.377689	3.55733	0.000374642	0.0241948	yes	-	-	GDP-D-GLUCOSE PHOSPHORYLASE 1	-	GO:0080048
320	gene-VFH_II131680	Vfaba.Hedin2.R1.2g131680.1	27.9215	2.42326	0.681217	3.55725	0.00037475	0.0241948	yes	LG2@102.1	-	OS01G0551000 PROTEIN	-	-
321	gene-VFH_I282120	Vfaba.Hedin2.R1.1g282120.1	20.3496	6.38079	1.79386	3.55702	0.000375085	0.0241948	yes	-	ABC-2 type transporter, ABC-2 type transporter, ABC transporter	ABC TRANSPORTER G FAMILY MEMBER 28	P-loop containing nucleoside triphosphate hydrolases	GO:0005524|GO:0140359|GO:0016020
322	gene-VFH_I371760	Vfaba.Hedin2.R1.1g371760.1	1079.99	1.37052	0.386143	3.54926	0.000386318	0.0248419	yes	-	Conserved in the green lineage and diatoms 27	-	-	-
323	gene-VFH_IV130680	Vfaba.Hedin2.R1.4g130680.1	332.725	-1.02315	0.288372	-3.548	0.000388166	0.0248835	yes	-	NADH dehydrogenase ubiquinone Fe-S protein 4	NADH-UBIQUINONE OXIDOREDUCTASE	-	GO:0005747|GO:0022900
324	gene-VFH_II208080	Vfaba.Hedin2.R1.2g208080.2	1286.4	-0.590892	0.166639	-3.54594	0.000391215	0.0249525	yes	-	Proteasome regulatory subunit C-terminal, PCI domain	26S PROTEASOME NON-ATPASE REGULATORY SUBUNIT 3/COP9 SIGNALOSOME COMPLEX SUBUNIT 3	Winged helix DNA-binding domain	GO:0000502|GO:0030234|GO:0042176
325	gene-VFH_II274560	Vfaba.Hedin2.R1.2g274560.1	2411.18	-0.977475	0.275683	-3.54565	0.000391653	0.0249525	yes	-	Coatomer beta subunit appendage platform, Coatomer beta C-terminal region, Adaptin N terminal region	COATOMER SUBUNIT BETA	ARM repeat	GO:0005198|GO:0006886|GO:0016192|GO:0030126|GO:0030117|GO:0005737
326	gene-VFH_III069440	Vfaba.Hedin2.R1.3g069440.1	152.78	3.41859	0.964472	3.54452	0.000393332	0.0249826	yes	LG3@75.2, LG3@119.2	AP2 domain	DNA-BINDING DOMAIN	DNA-binding domain	GO:0003677|GO:0003700|GO:0009873|GO:0006355
327	gene-VFH_V095360	Vfaba.Hedin2.R1.5g095360.1	255.638	-1.76963	0.499937	-3.5397	0.000400584	0.0253654	yes	LG5@107.3	DHHC palmitoyltransferase	ZINC FINGER DHHC DOMAIN CONTAINING PROTEIN	-	GO:0016409
328	gene-VFH_II049040	Vfaba.Hedin2.R1.2g049040.1	18.2039	2.8223	0.797512	3.53888	0.000401829	0.0253667	yes	LG2@50.1	Legume lectin domain, Legume lectin domain, Protein kinase domain	-	Protein kinase-like (PK-like), Concanavalin A-like lectins/glucanases	GO:0030246|GO:0004672|GO:0006468|GO:0005524
329	gene-VFH_I171560	Vfaba.Hedin2.R1.1g171560.1	60.3607	5.121	1.44886	3.5345	0.000408555	0.0257129	yes	LG1@168.9	Late embryogenesis abundant protein	OS05G0367900 PROTEIN	-	GO:0098542
330	gene-VFH_V143760	Vfaba.Hedin2.R1.5g143760.1	25.6662	-6.34666	1.79625	-3.53329	0.000410425	0.0257523	yes	-	-	-	-	-
331	gene-VFH_I097920	Vfaba.Hedin2.R1.1g097920.1	224.862	2.69619	0.763327	3.53216	0.000412184	0.0257845	yes	LG1@168.9	Salt stress response/antifungal, Salt stress response/antifungal, Salt stress response/antifungal, Protein kinase domain	PROMASTIGOTE SURFACE ANTIGEN PROTEIN PSA	Protein kinase-like (PK-like)	GO:0004672|GO:0006468|GO:0005524
332	gene-VFH_IV178080	Vfaba.Hedin2.R1.4g178080.1	20.8195	5.99421	1.69775	3.53068	0.0004145	0.0257959	yes	-	AUX/IAA family, AUX/IAA family	AUXIN-RESPONSIVE PROTEIN IAA17	CAD & PB1 domains	GO:0005634|GO:0006355|GO:0005515
333	gene-VFH_II151720	Vfaba.Hedin2.R1.2g151720.1	3271.25	2.02036	0.572267	3.53045	0.000414857	0.0257959	yes	LG2@102.1	No apical meristem (NAM) protein	NAC TRANSCRIPTION FACTOR 56	NAC domain	GO:0003677|GO:0006355
334	gene-VFH_VI012480	Vfaba.Hedin2.R1.6g012480.1	380.548	-0.996902	0.282557	-3.52815	0.000418475	0.0259429	yes	-	TraB/PrgY/gumN family	PHEROMONE SHUTDOWN PROTEIN	-	-
335	gene-VFH_U012080	Vfaba.Hedin2.R1.Ung012080.1	60.6985	-7.43349	2.10778	-3.52669	0.000420785	0.0260083	yes	-	Ketopantoate hydroxymethyltransferase, Arginase family, Arginase family	ARGINASE/AGMATINASE		GO:0003824|GO:0003864|GO:0015940|GO:0046872
336	gene-VFH_I378080	Vfaba.Hedin2.R1.1g378080.1	503.09	6.14716	1.74496	3.5228	0.000427011	0.0263146	yes	-	Jas motif, tify domain	PROTEIN TIFY 4A-RELATED-RELATED	-	-
337	gene-VFH_V090400	Vfaba.Hedin2.R1.5g090400.1	29853.4	-1.88854	0.536271	-3.52163	0.000428909	0.0263531	yes	LG5@107.3	Cobalamin-independent synthase, N-terminal domain, Cobalamin-independent synthase, Catalytic domain	5-METHYLTETRAHYDROPTEROYLTRIGLUTAMATE--HOMOCYSTEINE METHYLTRANSFERASE	UROD/MetE-like, UROD/MetE-like	GO:0003871|GO:0008270|GO:0008652|GO:0009086
338	gene-VFH_II217840	Vfaba.Hedin2.R1.2g217840.1	192.535	5.55575	1.58105	3.51396	0.000441481	0.0270453	yes	-	Helix-loop-helix DNA-binding domain	STEROL REGULATORY ELEMENT-BINDING PROTEIN	HLH, helix-loop-helix DNA-binding domain	GO:0046983|GO:0006355
339	gene-VFH_IV082440	Vfaba.Hedin2.R1.4g082440.1	10.1087	5.52647	1.57395	3.51121	0.000446064	0.0271647	yes	-	GAG-pre-integrase domain	-	-	-
340	gene-VFH_II242760	Vfaba.Hedin2.R1.2g242760.2	671.098	-6.50805	1.85382	-3.51061	0.00044708	0.0271647	yes	-	Regulated-SNARE-like domain, Synaptobrevin	SNARE PROTEINS	SNARE-like, SNARE fusion complex	GO:0016020|GO:0016192
341	gene-VFH_VI053040	Vfaba.Hedin2.R1.6g053040.1	867.434	4.63582	1.32078	3.50991	0.000448262	0.0271647	yes	-	Helix-loop-helix DNA-binding domain	STEROL REGULATORY ELEMENT-BINDING PROTEIN	HLH, helix-loop-helix DNA-binding domain	GO:0046983|GO:0006355
342	gene-VFH_VI170240	Vfaba.Hedin2.R1.6g170240.1	45.8307	-4.53949	1.29343	-3.50966	0.000448677	0.0271647	yes	LG6@169.6	-	-	-	-
343	gene-VFH_IV168240	Vfaba.Hedin2.R1.4g168240.1	10.8046	6.30535	1.79802	3.50682	0.00045349	0.027376	yes	-	K-box region, SRF-type transcription factor (DNA-binding and dimerisation domain)	SERUM RESPONSE FACTOR HOMOLOG	SRF-like	GO:0003700|GO:0005634|GO:0006355|GO:0000977|GO:0045944|GO:0003677|GO:0046983
344	gene-VFH_V052920	Vfaba.Hedin2.R1.5g052920.1	1440.67	-2.39532	0.683473	-3.50463	0.000457248	0.0275226	yes	LG5@79.6, LG5@86.9, LG5@93.9	Mitochondrial carrier protein, Mitochondrial carrier protein, Mitochondrial carrier protein	MITOCHONDRIAL DICARBOXYLATE CARRIER-RELATED	Mitochondrial carrier	GO:0006839|GO:0031966
345	gene-VFH_IV117720	Vfaba.Hedin2.R1.4g117720.1	240.099	2.4151	0.689329	3.50355	0.000459095	0.0275537	yes	-	-	AUXILIN/CYCLIN G-ASSOCIATED KINASE-RELATED	Chaperone J-domain	-
346	gene-VFH_I380960	Vfaba.Hedin2.R1.1g380960.1	36.2695	8.81642	2.51987	3.49876	0.000467419	0.0279722	yes	-	Cytochrome b(C-terminal)/b6/petD	CYTOCHROME B	a domain/subunit of cytochrome bc1 complex (Ubiquinol-cytochrome c reductase)	GO:0009767|GO:0042651|GO:0045156|GO:0009055|GO:0016020|GO:0016491
347	gene-VFH_I244480	Vfaba.Hedin2.R1.1g244480.1	14.8821	4.16309	1.19029	3.49755	0.00046955	0.0279973	yes	-	PRONE (Plant-specific Rop nucleotide exchanger)	ROP GUANINE NUCLEOTIDE EXCHANGE FACTOR 1	-	GO:0005085
348	gene-VFH_III053320	Vfaba.Hedin2.R1.3g053320.1	155.724	-2.27692	0.651304	-3.49594	0.00047239	0.0279973	yes	-	FabA-like domain	3-HYDROXYACYL-[ACYL-CARRIER-PROTEIN] DEHYDRATASE	Thioesterase/thiol ester dehydrase-isomerase	GO:0006633|GO:0016836
349	gene-VFH_II120000	Vfaba.Hedin2.R1.2g120000.1	67.8643	-1.56442	0.447519	-3.49578	0.000472686	0.0279973	yes	LG2@102.1	TLC domain	CT120 PROTEIN	-	GO:0016020
350	gene-VFH_I026280	Vfaba.Hedin2.R1.1g026280.1	286.29	-6.34519	1.81527	-3.49546	0.000473247	0.0279973	yes	-	Transferase family	-	CoA-dependent acyltransferases	-
351	gene-VFH_III139720	Vfaba.Hedin2.R1.3g139720.1	496.328	-1.4281	0.408817	-3.49326	0.000477167	0.0280905	yes	LG3@136.5, LG3@144.5	alpha/beta hydrolase fold	ARYLACETAMIDE DEACETYLASE	alpha/beta-Hydrolases	GO:0016787
352	gene-VFH_IV220920	Vfaba.Hedin2.R1.4g220920.1	983.618	-0.595554	0.170497	-3.49305	0.000477536	0.0280905	yes	-	Diacylglycerol kinase catalytic domain, Diacylglycerol kinase accessory domain	DIACYLGLYCEROL KINASE	NAD kinase/diacylglycerol kinase-like	GO:0004143|GO:0007165|GO:0016301|GO:0007205
353	gene-VFH_II193200	Vfaba.Hedin2.R1.2g193200.1	877.224	-1.17654	0.337466	-3.4864	0.000489574	0.0286087	yes	-	RNA polymerase I-associated factor PAF67	EUKARYOTIC TRANSLATION INITIATION FACTOR 3	-	GO:0003743|GO:0005737|GO:0005852
354	gene-VFH_V137040	Vfaba.Hedin2.R1.5g137040.1	36.4193	-7.34766	2.10766	-3.48617	0.000489998	0.0286087	yes	-	Major intrinsic protein	AQUAPORIN OR AQUAGLYCEROPORIN RELATED	Aquaporin-like	GO:0015267|GO:0016020|GO:0055085
355	gene-VFH_II245600	Vfaba.Hedin2.R1.2g245600.1	1021.67	-1.30741	0.375114	-3.48535	0.000491491	0.0286087	yes	-	Aldo/keto reductase family	ALDO/KETO REDUCTASE	NAD(P)-linked oxidoreductase	GO:0016491
356	gene-VFH_I466880	Vfaba.Hedin2.R1.1g466880.1	90.2332	1.91992	0.550921	3.48492	0.000492288	0.0286087	yes	-	Leucine rich repeat, Leucine rich repeat, Leucine rich repeat N-terminal domain	RECEPTOR-LIKE PROTEIN 12 ISOFORM X1	L domain-like	GO:0005515
357	gene-VFH_III073120	Vfaba.Hedin2.R1.3g073120.1	2649.58	-1.43095	0.410734	-3.4839	0.000494167	0.0286087	yes	LG3@75.2, LG3@119.2	Pyruvate kinase, alpha/beta domain, Pyruvate kinase, barrel domain	PYRUVATE KINASE	PK C-terminal domain-like, Phosphoenolpyruvate/pyruvate domain, PK beta-barrel domain-like	GO:0003824|GO:0004743|GO:0006096|GO:0000287|GO:0030955
358	gene-VFH_V074840	Vfaba.Hedin2.R1.5g074840.1	306.456	-0.886677	0.254602	-3.4826	0.00049657	0.0286087	yes	LG5@79.6, LG5@86.9, LG5@93.9	Purine nucleobase transmembrane transport	OS09G0467300 PROTEIN-RELATED	-	GO:0015211|GO:0016020
359	gene-VFH_U097400	Vfaba.Hedin2.R1.Ung097400.2	453.178	4.42875	1.27177	3.48236	0.000497024	0.0286087	yes	-	Heavy-metal-associated domain, Heavy-metal-associated domain	HEAVY METAL-ASSOCIATED ISOPRENYLATED PLANT PROTEIN 7		GO:0046872
360	gene-VFH_VI021240	Vfaba.Hedin2.R1.6g021240.1	450.22	2.50703	0.720087	3.48157	0.000498486	0.0286087	yes	-	-	BNAC05G50380D PROTEIN	-	-
361	gene-VFH_I428760	Vfaba.Hedin2.R1.1g428760.1	24914.5	-3.26133	0.936801	-3.48135	0.000498902	0.0286087	yes	-	Pathogenesis-related protein Bet v 1 family	-	Bet v1-like	GO:0006952|GO:0004864|GO:0009738|GO:0010427|GO:0038023
362	gene-VFH_I232800	Vfaba.Hedin2.R1.1g232800.1	1309.93	2.97459	0.854603	3.48067	0.000500162	0.0286087	yes	-	NPH3 family, BTB/POZ domain	OS12G0117600 PROTEIN	POZ domain	GO:0005515
363	gene-VFH_V166040	Vfaba.Hedin2.R1.5g166040.1	488.127	1.45007	0.417129	3.47631	0.000508361	0.0289976	yes	-	bZIP transcription factor	BZIP TRANSCRIPTION FACTOR 44	Leucine zipper domain	GO:0003700|GO:0006355
364	gene-VFH_I493640	Vfaba.Hedin2.R1.1g493640.1	1531.56	-0.721509	0.207604	-3.47541	0.000510081	0.0290158	yes	-	NifU-like domain, NifU-like domain	IRON-SULFUR CLUSTER SCAFFOLD PROTEIN NFU-RELATED	Fe-S cluster assembly (FSCA) domain-like, Fe-S cluster assembly (FSCA) domain-like	GO:0005506|GO:0016226|GO:0051536
365	gene-VFH_III140520	Vfaba.Hedin2.R1.3g140520.1	202.964	-4.39067	1.26415	-3.47323	0.000514226	0.0291714	yes	LG3@136.5, LG3@144.5	Exostosin family	EXOSTOSIN HEPARAN SULFATE GLYCOSYLTRANSFERASE -RELATED	-	GO:0006486|GO:0016757
366	gene-VFH_I479440	Vfaba.Hedin2.R1.1g479440.1	635.883	1.27061	0.366071	3.47095	0.000518615	0.0291726	yes	-	PLAC8 family	DUF614 FAMILY PROTEIN-RELATED	-	-
367	gene-VFH_II220000	Vfaba.Hedin2.R1.2g220000.1	264.425	-1.03118	0.297192	-3.46974	0.000520967	0.0291726	yes	-	Variant SH3 domain	SH3 DOMAIN-CONTAINING	SH3-domain, BAR/IMD domain-like	GO:0005515
368	gene-VFH_II024960	Vfaba.Hedin2.R1.2g024960.1	274.918	-1.09962	0.316957	-3.46929	0.000521827	0.0291726	yes	LG2@10.7	haloacid dehalogenase-like hydrolase	PHOSPHOSERINE PHOSPHATASE	HAD-like	-
369	gene-VFH_U077040	Vfaba.Hedin2.R1.Ung077040.1	6902.7	-2.54544	0.73388	-3.46847	0.000523422	0.0291726	yes	-	D-isomer specific 2-hydroxyacid dehydrogenase, NAD binding domain, D-isomer specific 2-hydroxyacid dehydrogenase, catalytic domain	FORMATE DEHYDROGENASE 1		GO:0051287|GO:0016616|GO:0008863
370	gene-VFH_U117200	Vfaba.Hedin2.R1.Ung117200.1	931.178	-2.80133	0.807836	-3.4677	0.000524941	0.0291726	yes	-	Glutathione S-transferase, C-terminal domain, Glutathione S-transferase, N-terminal domain	GLUTATHIONE S-TRANSFERASE L1		GO:0004364
371	gene-VFH_II187160	Vfaba.Hedin2.R1.2g187160.1	90.3938	-1.19113	0.343511	-3.46753	0.000525272	0.0291726	yes	-	CCDC93, coiled-coil domain	FIDIPIDINE	-	-
372	gene-VFH_V069000	Vfaba.Hedin2.R1.5g069000.1	497.785	-1.34718	0.388533	-3.46736	0.000525603	0.0291726	yes	LG5@79.6, LG5@86.9, LG5@93.9	QLQ, Helicase conserved C-terminal domain, SNF2-related domain	SNF2/RAD54 HELICASE FAMILY	P-loop containing nucleoside triphosphate hydrolases, P-loop containing nucleoside triphosphate hydrolases, Bromodomain	GO:0005524|GO:0140658|GO:0005515|GO:0005634|GO:0006355
373	gene-VFH_U118160	Vfaba.Hedin2.R1.Ung118160.1	3793.1	-0.813723	0.234722	-3.46676	0.00052678	0.0291726	yes	-	V-type ATPase 116kDa subunit family	VACUOLAR PROTON ATPASES		GO:0000220|GO:0046961|GO:0033179|GO:1902600
374	gene-VFH_II145200	Vfaba.Hedin2.R1.2g145200.1	483.42	-0.679311	0.195954	-3.46668	0.000526928	0.0291726	yes	LG2@102.1	Alba	RIBONUCLEASE P SUBUNIT P25	AlbA-like	GO:0003676
375	gene-VFH_VI102360	Vfaba.Hedin2.R1.6g102360.1	41.1845	-4.36222	1.25922	-3.46423	0.000531759	0.0293616	yes	-	Hsp20/alpha crystallin family	HEAT-SHOCK PROTEIN 20 FAMILY MEMBER	HSP20-like chaperones	-
376	gene-VFH_U029840	Vfaba.Hedin2.R1.Ung029840.2	501.485	-0.671185	0.193967	-3.4603	0.000539577	0.029714	yes	-	First Longin domain of INTU, CCZ1 and HPS4	UNCHARACTERIZED		GO:0016192|GO:0035658
377	gene-VFH_IV125360	Vfaba.Hedin2.R1.4g125360.1	157.322	2.80492	0.811672	3.45573	0.000548799	0.0301417	yes	-	Protein kinase domain	CCR4-NOT TRANSCRIPTIONAL COMPLEX SUBUNIT CAF120-RELATED	Protein kinase-like (PK-like)	GO:0004672|GO:0006468|GO:0005524
378	gene-VFH_IV148680	Vfaba.Hedin2.R1.4g148680.1	4.50774	6.38271	1.84842	3.45307	0.000554243	0.0303185	yes	LG4@135.3	EF-hand domain pair, EF-hand domain pair	CALCIUM BINDING PROTEIN	EF-hand	GO:0005509
379	gene-VFH_V008480	Vfaba.Hedin2.R1.5g008480.1	247.864	-1.3032	0.377442	-3.45273	0.000554946	0.0303185	yes	-	-	DNA-DIRECTED RNA POLYMERASE SUBUNIT BETA	-	-
380	gene-VFH_VI047200	Vfaba.Hedin2.R1.6g047200.1	431.962	-1.27395	0.36919	-3.45067	0.000559198	0.0304704	yes	-	Synaptotagmin-like mitochondrial-lipid-binding domain, C2 domain, C2 domain	EXTENDED SYNAPTOTAGMIN-RELATED	C2 domain (Calcium/lipid-binding domain, CaLB), C2 domain (Calcium/lipid-binding domain, CaLB)	GO:0008289
381	gene-VFH_IV010920	Vfaba.Hedin2.R1.4g010920.1	1727.21	-1.29527	0.375466	-3.44977	0.000561069	0.0304898	yes	-	GDP-mannose 4, 6 dehydratase, RmlD substrate binding domain	DTDP-D-GLUCOSE 4, 6-DEHYDRATASE-RELATED	NAD(P)-binding Rossmann-fold domains, NAD(P)-binding Rossmann-fold domains	GO:0008460|GO:0009225
382	gene-VFH_IV138520	Vfaba.Hedin2.R1.4g138520.1	1890.66	1.80834	0.524303	3.44904	0.000562585	0.0304898	yes	-	AP2 domain	DNA-BINDING DOMAIN	DNA-binding domain	GO:0003700|GO:0009873|GO:0003677|GO:0006355
383	gene-VFH_VI059160	Vfaba.Hedin2.R1.6g059160.1	11.1306	-8.09367	2.34755	-3.44771	0.000565352	0.0304898	yes	-	Cytochrome P450	CYTOCHROME P450, FAMILY 76, SUBFAMILY C, POLYPEPTIDE 5-RELATED	Cytochrome P450	GO:0005506|GO:0016705|GO:0004497|GO:0020037
384	gene-VFH_IV220520	Vfaba.Hedin2.R1.4g220520.1	33.9433	-7.22711	2.09623	-3.44767	0.000565444	0.0304898	yes	-	Biotin-requiring enzyme	DIHYDROLIPOYLLYSINE-RESIDUE SUCCINYLTRANSFERASE COMPONENT OF 2-OXOGLUTARATE DEHYDROGENASE COMPLEX, MITOCHONDRIAL-RELATED	Single hybrid motif	GO:0003989|GO:0006633|GO:0009317
385	gene-VFH_II124160	Vfaba.Hedin2.R1.2g124160.1	28.2454	2.29956	0.667362	3.44575	0.000569469	0.0306013	yes	LG2@102.1	EF-hand domain pair, EF-hand domain pair	CALCINEURIN B	EF-hand	GO:0005509|GO:0019722|GO:0019900
386	gene-VFH_I102840	Vfaba.Hedin2.R1.1g102840.1	120.163	2.74199	0.795868	3.44528	0.000570467	0.0306013	yes	LG1@168.9	HSF-type DNA-binding	HEAT SHOCK TRANSCRIPTION FACTOR	Winged helix DNA-binding domain	GO:0003700|GO:0006355|GO:0043565
387	gene-VFH_III163880	Vfaba.Hedin2.R1.3g163880.1	9.22363	3.90127	1.13281	3.44388	0.000573439	0.0306297	yes	-	-	OS08G0359900 PROTEIN	-	-
388	gene-VFH_I097840	Vfaba.Hedin2.R1.1g097840.1	718.824	2.3966	0.695978	3.4435	0.000574238	0.0306297	yes	LG1@168.9	Salt stress response/antifungal, Salt stress response/antifungal, Salt stress response/antifungal, Salt stress response/antifungal, Protein kinase domain	PROMASTIGOTE SURFACE ANTIGEN PROTEIN PSA	Protein kinase-like (PK-like)	GO:0004672|GO:0006468|GO:0005524
389	gene-VFH_III011640	Vfaba.Hedin2.R1.3g011640.1	92.0496	4.89669	1.42224	3.44294	0.000575435	0.0306297	yes	-	Leucine rich repeat, Leucine rich repeat, Leucine rich repeat, Leucine rich repeat, Leucine Rich repeat, Leucine Rich Repeat	LEUCINE RICH REPEAT KINASE 2	L domain-like, L domain-like	GO:0005515
390	gene-VFH_I306920	Vfaba.Hedin2.R1.1g306920.1	2283.53	-0.648689	0.188585	-3.43977	0.000582218	0.0308716	yes	qFB1.2	ADP-ribosylation factor family	ADP RIBOSYLATION FACTOR-RELATED	P-loop containing nucleoside triphosphate hydrolases	GO:0003924|GO:0005525
391	gene-VFH_I322200	Vfaba.Hedin2.R1.1g322200.1	21.3141	-6.83783	1.98808	-3.43942	0.000582961	0.0308716	yes	-	-	OS09G0555300 PROTEIN	Kelch motif	GO:0005515
392	gene-VFH_I410360	Vfaba.Hedin2.R1.1g410360.1	84.3566	2.3306	0.677818	3.43839	0.00058518	0.03091	yes	-	Protein kinase domain	MITOGEN-ACTIVATED KINASE KINASE KINASE	Protein kinase-like (PK-like)	GO:0004672|GO:0006468|GO:0005524
393	gene-VFH_III172000	Vfaba.Hedin2.R1.3g172000.1	215.239	-1.15238	0.335379	-3.43604	0.000590279	0.0311	yes	-	-	RIBOSOMAL RNA SMALL SUBUNIT METHYLTRANSFERASE J	-	-
394	gene-VFH_IV063280	Vfaba.Hedin2.R1.4g063280.2	130.784	-2.91518	0.850212	-3.42877	0.000606326	0.0317312	yes	-	Phospholipid-translocating P-type ATPase C-terminal, Phospholipid-translocating ATPase N-terminal, Cation transport ATPase (P-type)	PROBABLE PHOSPHOLIPID-TRANSPORTING ATPASE	Calcium ATPase, transmembrane domain M, Metal cation-transporting ATPase, ATP-binding domain N, Calcium ATPase, transduction domain A, HAD-like	GO:0000287|GO:0005524|GO:0015914|GO:0016020|GO:0140326|GO:0005215|GO:0016887|GO:0000166
395	gene-VFH_III113800	Vfaba.Hedin2.R1.3g113800.1	534.909	-1.05946	0.309062	-3.42799	0.000608068	0.0317312	yes	LG3@75.2, LG3@119.2, LG3@136.5	WD domain, G-beta repeat, WD domain, G-beta repeat, WD domain, G-beta repeat, WD domain, G-beta repeat	MRNA EXPORT FACTOR AND BUB3	WD40 repeat-like	GO:0005515
396	gene-VFH_III173760	Vfaba.Hedin2.R1.3g173760.1	356.98	3.13412	0.914381	3.42759	0.000608966	0.0317312	yes	-	Leucine rich repeat, Leucine rich repeat N-terminal domain, Protein kinase domain	LEUCINE RICH REPEAT KINASE 2	Protein kinase-like (PK-like), L domain-like, RNI-like, RNI-like	GO:0004672|GO:0006468|GO:0005515|GO:0005524
397	gene-VFH_III206720	Vfaba.Hedin2.R1.3g206720.1	55.6555	-5.77401	1.68483	-3.42705	0.00061018	0.0317312	yes	-	Aldehyde dehydrogenase family	ALDEHYDE DEHYDROGENASE	ALDH-like	GO:0016491|GO:0016620
398	gene-VFH_V104480	Vfaba.Hedin2.R1.5g104480.1	8.90782	7.21619	2.10576	3.42688	0.000610561	0.0317312	yes	-	Cytokinin dehydrogenase 1, FAD and cytokinin binding, FAD binding domain	GULONOLACTONE OXIDASE	FAD-binding/transporter-associated domain-like, FAD-linked oxidases, C-terminal domain	GO:0009690|GO:0019139|GO:0050660|GO:0071949|GO:0003824|GO:0016491
399	gene-VFH_IV115480	Vfaba.Hedin2.R1.4g115480.1	91.9766	3.37772	0.98577	3.42648	0.000611452	0.0317312	yes	-	Cytochrome P450	CYTOCHROME P450 26	Cytochrome P450	GO:0004497|GO:0005506|GO:0016705|GO:0020037
400	gene-VFH_IV164120	Vfaba.Hedin2.R1.4g164120.1	80.4829	-2.8878	0.843465	-3.42374	0.000617667	0.0319735	yes	-	AAA lid domain, C-terminal, D2-small domain, of ClpB protein, AAA domain (Cdc48 subfamily), Clp amino terminal domain, pathogenicity island component, Clp amino terminal domain, pathogenicity island component, ATPase family associated with various cellular activities (AAA)	ATP-DEPENDENT CLP PROTEASE	Double Clp-N motif, P-loop containing nucleoside triphosphate hydrolases, P-loop containing nucleoside triphosphate hydrolases	GO:0005524|GO:0016887
401	gene-VFH_II172320	Vfaba.Hedin2.R1.2g172320.1	31.5006	-4.23205	1.23673	-3.42196	0.000621711	0.0320518	yes	LG2@102.1, LG2@169.8, LG2@171.4	AP2 domain, AP2 domain	AP2-LIKE ETHYLENE-RESPONSIVE TRANSCRIPTION FACTOR	DNA-binding domain, DNA-binding domain	GO:0003677|GO:0003700|GO:0006355
402	gene-VFH_I084080	Vfaba.Hedin2.R1.1g084080.1	622.083	2.07227	0.605622	3.42171	0.000622275	0.0320518	yes	LG1@168.9	Malectin domain, Protein kinase domain	LEUCINE-RICH REPEAT-CONTAINING PROTEIN DDB_G0281931-RELATED	Protein kinase-like (PK-like), L domain-like	GO:0004672|GO:0005524|GO:0006468
403	gene-VFH_III022400	Vfaba.Hedin2.R1.3g022400.1	776.581	2.65855	0.777595	3.41894	0.000628666	0.0323007	yes	LG3@24.7, LG3@27.7, LG3@28.4	Heavy-metal-associated domain	COPPER TRANSPORT PROTEIN ATOX1-RELATED	HMA, heavy metal-associated domain	GO:0046872
404	gene-VFH_VI114880	Vfaba.Hedin2.R1.6g114880.2	470.295	0.801478	0.234609	3.41623	0.000634946	0.0325128	yes	-	Stress-induced protein Di19, C-terminal, Drought induced 19 protein (Di19), zinc-binding	PROTEIN DEHYDRATION-INDUCED 19	-	-
405	gene-VFH_II231400	Vfaba.Hedin2.R1.2g231400.1	7.797	5.58835	1.63632	3.4152	0.000637344	0.0325128	yes	-	-	-	-	-
406	gene-VFH_I316480	Vfaba.Hedin2.R1.1g316480.1	160.303	-1.48566	0.435021	-3.41513	0.000637505	0.0325128	yes	-	Putative small multi-drug export protein	TRANSPORT PROTEIN-RELATED	-	-
407	gene-VFH_I375040	Vfaba.Hedin2.R1.1g375040.1	1092.85	-1.1154	0.326823	-3.41285	0.000642862	0.0326823	yes	-	Amino-transferase class IV	AMINO ACID AMINOTRANSFERASE	D-aminoacid aminotransferase-like PLP-dependent enzymes	GO:0004084|GO:0009081|GO:0003824
408	gene-VFH_V072800	Vfaba.Hedin2.R1.5g072800.1	2639.69	-0.845025	0.247635	-3.41238	0.000643987	0.0326823	yes	LG5@79.6, LG5@86.9, LG5@93.9	NUDIX domain	ISOPENTENYL-DIPHOSPHATE DELTA-ISOMERASE	Nudix	GO:0004452|GO:0008299
409	gene-VFH_II093880	Vfaba.Hedin2.R1.2g093880.1	511.9	-0.843434	0.247321	-3.41029	0.000648949	0.0327358	yes	LG2@102.1	-	SUCCINATE DEHYDROGENASE SUBUNIT 4, MITOCHONDRIAL	Fumarate reductase respiratory complex transmembrane subunits	GO:0016020|GO:0005743|GO:0005749|GO:0006099|GO:0006121
410	gene-VFH_I010400	Vfaba.Hedin2.R1.1g010400.1	24.6616	-5.70916	1.67453	-3.40941	0.000651028	0.0327358	yes	-	EXS family, SPX domain	XENOTROPIC AND POLYTROPIC RETROVIRUS RECEPTOR 1-RELATED	-	GO:0016020
411	gene-VFH_VI166560	Vfaba.Hedin2.R1.6g166560.1	107.183	4.69609	1.37739	3.40941	0.000651047	0.0327358	yes	LG6@169.6	short chain dehydrogenase	RETINOL DEHYDROGENASE-RELATED	NAD(P)-binding Rossmann-fold domains	GO:0016491
412	gene-VFH_III079600	Vfaba.Hedin2.R1.3g079600.2	103.92	-2.10168	0.616524	-3.40891	0.000652229	0.0327358	yes	LG3@75.2, LG3@119.2	PPR repeat family, PPR repeat family, PPR repeat family, PPR repeat, PPR repeat, PPR repeat, PPR repeat	PENTATRICOPEPTIDE REPEAT-CONTAINING PROTEIN 3, MITOCHONDRIAL	-	GO:0005515
413	gene-VFH_VI115800	Vfaba.Hedin2.R1.6g115800.1	445.176	-2.41178	0.707555	-3.40861	0.000652944	0.0327358	yes	-	Ribosomal protein L23, N-terminal domain, Ribosomal protein L23	60S RIBOSOMAL PROTEIN L23A	Ribosomal proteins S24e, L23 and L15e	GO:0019843|GO:0003735|GO:0005840|GO:0006412
414	gene-VFH_IV242320	Vfaba.Hedin2.R1.4g242320.1	1093.95	-0.878656	0.257852	-3.4076	0.00065537	0.032778	yes	-	PB1 domain	PROTEIN CLMP1	CAD & PB1 domains, TPR-like, TPR-like	GO:0005515
415	gene-VFH_I432360	Vfaba.Hedin2.R1.1g432360.1	373.263	1.94889	0.572298	3.40538	0.000660715	0.0329657	yes	-	Iron-Sulfur binding protein C terminal	PHOTOSYSTEM I IRON-SULFUR CENTER-RELATED	4Fe-4S ferredoxins	-
416	gene-VFH_II064480	Vfaba.Hedin2.R1.2g064480.1	1291.39	-0.853533	0.25075	-3.40391	0.000664278	0.0330638	yes	LG2@68.4, LG2@84.5	AAA+ lid domain, Proteasomal ATPase OB C-terminal domain, ATPase family associated with various cellular activities (AAA)	26S PROTEASOME REGULATORY SUBUNIT	P-loop containing nucleoside triphosphate hydrolases	GO:0005524|GO:0016887|GO:0005737|GO:0030163|GO:0036402
417	gene-VFH_V019920	Vfaba.Hedin2.R1.5g019920.1	32.6198	3.24529	0.95367	3.40294	0.000666638	0.0331017	yes	-	No apical meristem (NAM) protein	NAC DOMAIN-CONTAINING PROTEIN 73	NAC domain	GO:0003700|GO:0003677|GO:0006355
418	gene-VFH_I406000	Vfaba.Hedin2.R1.1g406000.1	143.413	2.57319	0.756483	3.40151	0.000670145	0.0331962	yes	-	-	TRANSMEMBRANE PROTEIN	-	-
419	gene-VFH_I333760	Vfaba.Hedin2.R1.1g333760.1	6.52813	-6.8247	2.00695	-3.40053	0.000672563	0.0332365	yes	-	-	-	Cysteine proteinases	-
420	gene-VFH_VI023880	Vfaba.Hedin2.R1.6g023880.1	7.06277	-7.90179	2.32443	-3.39945	0.00067521	0.0332806	yes	-	Fibronectin type-III domain, Peptidase inhibitor I9, PA domain, Subtilase family	PROPROTEIN CONVERTASE SUBTILISIN/KEXIN	Subtilisin-like	GO:0004252|GO:0006508|GO:0008236
421	gene-VFH_VI187120	Vfaba.Hedin2.R1.6g187120.1	53.7345	-8.42851	2.4798	-3.39886	0.000676671	0.0332806	yes	-	-	-	-	-
422	gene-VFH_III014960	Vfaba.Hedin2.R1.3g014960.1	500.909	-0.847777	0.249502	-3.39787	0.000679122	0.033306	yes	-	Nuclear transport factor 2 (NTF2) domain, RNA recognition motif. (a.k.a. RRM, RBD, or RNP domain)	RAS GTPASE-ACTIVATING PROTEIN-BINDING PROTEIN	RNA-binding domain, RBD, NTF2-like	GO:0003676|GO:0003723
423	gene-VFH_VI003480	Vfaba.Hedin2.R1.6g003480.1	236.094	-1.60975	0.473825	-3.39736	0.000680404	0.033306	yes	-	NAD-dependent glycerol-3-phosphate dehydrogenase C-terminus, NAD-dependent glycerol-3-phosphate dehydrogenase N-terminus	GLYCEROL-3-PHOSPHATE DEHYDROGENASE	NAD(P)-binding Rossmann-fold domains, 6-phosphogluconate dehydrogenase C-terminal domain-like	GO:0016491|GO:0016616|GO:0046168|GO:0051287|GO:0005975|GO:0047952
424	gene-VFH_I176440	Vfaba.Hedin2.R1.1g176440.1	622.666	-0.583152	0.171715	-3.39605	0.00068366	0.0333865	yes	-	Galactose-1-phosphate uridyl transferase, N-terminal domain	ADP-GLUCOSE PHOSPHORYLASE	HIT-like, HIT-like	GO:0006012|GO:0008108
425	gene-VFH_II079240	Vfaba.Hedin2.R1.2g079240.1	2084.42	-1.65168	0.48655	-3.39468	0.000687099	0.0334544	yes	LG2@84.5, LG2@102.1	Biotin-requiring enzyme	IS A MEMBER OF THE PF|00364 BIOTIN-REQUIRING ENZYMES FAMILY-RELATED	Single hybrid motif	-
426	gene-VFH_I039840	Vfaba.Hedin2.R1.1g039840.1	1000.27	2.21788	0.653433	3.3942	0.000688282	0.0334544	yes	LG1@168.9	Possible lysine decarboxylase	LOG FAMILY PROTEIN YJL055W	MCP/YpsA-like	GO:0009691|GO:0016787
427	gene-VFH_III005400	Vfaba.Hedin2.R1.3g005400.1	833.674	-0.880416	0.259784	-3.38903	0.000701409	0.0340126	yes	-	Nucleotide-sugar transporter	NUCLEOTIDE-SUGAR TRANSMEMBRANE TRANSPORTER	Multidrug resistance efflux transporter EmrE	GO:0000139|GO:0015165|GO:0016020|GO:0090481
428	gene-VFH_U024320	Vfaba.Hedin2.R1.Ung024320.1	7018.42	-1.01307	0.2991	-3.38707	0.00070643	0.0341107	yes	-	Citrate synthase, C-terminal domain	CITRATE SYNTHASE		GO:0004108|GO:0006101|GO:0046912|GO:0006099
429	gene-VFH_I365640	Vfaba.Hedin2.R1.1g365640.1	1168.96	0.857282	0.253114	3.38694	0.000706765	0.0341107	yes	-	DEK C terminal domain, SWIB/MDM2 domain, SWIB/MDM2 domain	SWI/SNF-RELATED MATRIX-ASSOCIATED ACTIN-DEPENDENT REGULATOR OF CHROMATIN SUBFAMILY D	SWIB/MDM2 domain, SWIB/MDM2 domain, DEK C-terminal domain	-
430	gene-VFH_IV201240	Vfaba.Hedin2.R1.4g201240.1	24549.5	-2.19906	0.649395	-3.38632	0.000708375	0.0341107	yes	-	S-adenosylmethionine synthetase, C-terminal domain, S-adenosylmethionine synthetase, central domain, S-adenosylmethionine synthetase, N-terminal domain	S-ADENOSYLMETHIONINE SYNTHETASE	S-adenosylmethionine synthetase, S-adenosylmethionine synthetase, S-adenosylmethionine synthetase	GO:0004478|GO:0006556|GO:0005524
431	gene-VFH_IV052240	Vfaba.Hedin2.R1.4g052240.2	154.956	2.8809	0.851054	3.3851	0.000711519	0.0341826	yes	-	Protein of unknown function (DUF4005), IQ calmodulin-binding motif, IQ calmodulin-binding motif	IQ-DOMAIN 5-RELATED	-	GO:0005515
432	gene-VFH_V065840	Vfaba.Hedin2.R1.5g065840.1	120.329	2.45595	0.726031	3.38271	0.000717743	0.0344018	yes	LG5@79.6, LG5@86.9, LG5@93.9	E motif, PPR repeat family, PPR repeat, PPR repeat, PPR repeat, PPR repeat, PPR repeat, PPR repeat, PPR repeat	PENTATRICOPEPTIDE REPEAT-CONTAINING PROTEIN	-	GO:0005515
433	gene-VFH_II035200	Vfaba.Hedin2.R1.2g035200.1	58.0182	-2.04753	0.605697	-3.38045	0.000723676	0.0346061	yes	LG2@10.7	Helicase conserved C-terminal domain, DEAD/DEAH box helicase	ATP-DEPENDENT RNA HELICASE RHLE-RELATED	P-loop containing nucleoside triphosphate hydrolases	GO:0003724|GO:0003676|GO:0005524
434	gene-VFH_IV079440	Vfaba.Hedin2.R1.4g079440.1	669.485	-1.32071	0.391293	-3.37525	0.000737477	0.0351848	yes	-	Adenylate kinase	NUCLEOTIDE KINASE	P-loop containing nucleoside triphosphate hydrolases	GO:0005524|GO:0006139|GO:0019205|GO:0004127|GO:0006207|GO:0006221|GO:0009041
435	gene-VFH_II129760	Vfaba.Hedin2.R1.2g129760.1	268.814	2.06294	0.611488	3.37363	0.000741837	0.035233	yes	LG2@102.1	ACT domain, ACT domain	ACT DOMAIN-CONTAINING PROTEIN ACR4-RELATED	ACT-like, ACT-like, ACT-like	-
436	gene-VFH_IV231720	Vfaba.Hedin2.R1.4g231720.1	295.296	-1.22357	0.362689	-3.37361	0.000741891	0.035233	yes	-	Seryl-tRNA synthetase N-terminal domain, tRNA synthetase class II core domain (G, H, P, S and T)	SERYL-TRNA SYNTHETASE	Class II aaRS and biotin synthetases, tRNA-binding arm	GO:0000166|GO:0004812|GO:0005524|GO:0006418|GO:0004828|GO:0006434
437	gene-VFH_V154360	Vfaba.Hedin2.R1.5g154360.1	416.02	3.94946	1.1711	3.37244	0.000745057	0.0353024	yes	-	U-box domain	WDSAM1 PROTEIN	RING/U-box, ARM repeat	GO:0061630|GO:0004842|GO:0016567
438	gene-VFH_I283160	Vfaba.Hedin2.R1.1g283160.1	141.987	-1.22864	0.364682	-3.36906	0.000754243	0.0356561	yes	-	Cytochrome oxidase assembly protein	CYTOCHROME C OXIDASE ASSEMBLY PROTEIN COX15	-	GO:0006784|GO:0016020|GO:0016653
439	gene-VFH_II107080	Vfaba.Hedin2.R1.2g107080.1	895.754	-0.761755	0.226153	-3.36832	0.000756267	0.0356703	yes	LG2@102.1	Aminotransferase class-V	CYSTEINE DESULFURASE	PLP-dependent transferases	GO:0003824|GO:0006534|GO:0030170|GO:0031071
440	gene-VFH_VI027040	Vfaba.Hedin2.R1.6g027040.1	217.074	1.3916	0.413273	3.36728	0.000759148	0.0357248	yes	-	Protein kinase domain	OS01G0750732 PROTEIN	Protein kinase-like (PK-like)	GO:0004672|GO:0006468|GO:0005524
441	gene-VFH_IV229280	Vfaba.Hedin2.R1.4g229280.2	751.254	3.44565	1.02401	3.36487	0.000765793	0.0359558	yes	-	-	OS05G0397300 PROTEIN	-	-
442	gene-VFH_U061680	Vfaba.Hedin2.R1.Ung061680.1	39.6471	4.29014	1.27575	3.36284	0.000771464	0.0361401	yes	-	Pathogenesis-related protein Bet v 1 family	-		GO:0004864|GO:0009738|GO:0010427|GO:0038023|GO:0006952
443	gene-VFH_U059800	Vfaba.Hedin2.R1.Ung059800.1	20.5171	6.48903	1.93378	3.35561	0.000791889	0.0370132	yes	-	Ubiquitin-conjugating enzyme	(E3-INDEPENDENT) E2 UBIQUITIN-CONJUGATING ENZYME		-
444	gene-VFH_I117720	Vfaba.Hedin2.R1.1g117720.1	462.952	-0.970848	0.28959	-3.35249	0.000800886	0.0373342	yes	LG1@168.9	Histidine phosphatase superfamily (branch 1)	PUTATIVE-RELATED	Phosphoglycerate mutase-like	-
445	gene-VFH_V054680	Vfaba.Hedin2.R1.5g054680.1	426.919	1.42692	0.425696	3.35198	0.000802363	0.0373342	yes	LG5@79.6, LG5@86.9, LG5@93.9	Myb-like DNA-binding domain, Myb-like DNA-binding domain	DUPLICATED HOMEODOMAIN-LIKE SUPERFAMILY PROTEIN-RELATED, DUPLICATED HOMEODOMAIN-LIKE SUPERFAMILY PROTEIN-RELATED	Homeodomain-like, Homeodomain-like	GO:0003677
446	gene-VFH_III137720	Vfaba.Hedin2.R1.3g137720.1	38.2939	2.59585	0.774629	3.3511	0.000804926	0.0373695	yes	LG3@75.2, LG3@119.2, LG3@136.5, LG3@144.5	Phloem protein 2	F-BOX PROTEIN PP2-A15	F-box domain	GO:0005515
447	gene-VFH_II259600	Vfaba.Hedin2.R1.2g259600.1	11.4426	4.69492	1.40141	3.35013	0.000807723	0.0374155	yes	-	Protein kinase domain, Cytochrome P450	MYOTONIC DYSTROPHY S/T KINASE-RELATED	Protein kinase-like (PK-like), Cytochrome P450	GO:0004497|GO:0005506|GO:0016705|GO:0020037|GO:0004672|GO:0005524|GO:0006468
448	gene-VFH_III014880	Vfaba.Hedin2.R1.3g014880.1	131.002	-5.01816	1.49941	-3.34676	0.000817623	0.0377756	yes	-	Plants and Prokaryotes Conserved (PCC) domain	AT-HOOK MOTIF NUCLEAR-LOCALIZED PROTEIN 15	AF0104/ALDC/Ptd012-like	GO:0003680
449	gene-VFH_III141120	Vfaba.Hedin2.R1.3g141120.1	630.571	-0.827355	0.247249	-3.34624	0.000819147	0.0377756	yes	LG3@136.5, LG3@144.5	Dyggve-Melchior-Clausen syndrome protein	DYMECLIN	-	-
450	gene-VFH_II041560	Vfaba.Hedin2.R1.2g041560.1	218.307	-1.06956	0.319948	-3.34292	0.000829014	0.0381329	yes	LG2@10.7	Ataxin 2 SM domain	ATAXIN 2-RELATED	-	GO:0003723
451	gene-VFH_III233120	Vfaba.Hedin2.R1.3g233120.2	431.165	0.821261	0.24571	3.3424	0.000830578	0.0381329	yes	-	Pentatricopeptide repeat domain, Pentatricopeptide repeat domain, PPR repeat family, PPR repeat family	PENTATRICOPEPTIDE REPEAT-CONTAINING PROTEIN	-	GO:0005515
452	gene-VFH_III212480	Vfaba.Hedin2.R1.3g212480.1	98.2778	1.53727	0.46037	3.33919	0.000840218	0.0384902	yes	-	Protein kinase domain	SERINE/THREONINE KINASE	Protein kinase-like (PK-like)	GO:0004672|GO:0006468|GO:0005524
453	gene-VFH_IV048200	Vfaba.Hedin2.R1.4g048200.1	221.479	2.27492	0.681692	3.33717	0.000846364	0.0386861	yes	-	UDP-glucoronosyl and UDP-glucosyl transferase	UDP-GLYCOSYLTRANSFERASE 72B1	UDP-Glycosyltransferase/glycogen phosphorylase	GO:0008194
454	gene-VFH_I213280	Vfaba.Hedin2.R1.1g213280.1	99.2407	-2.96675	0.88952	-3.33522	0.000852311	0.0388721	yes	-	UDP-glucoronosyl and UDP-glucosyl transferase	GLUCOSYL/GLUCURONOSYL TRANSFERASES	UDP-Glycosyltransferase/glycogen phosphorylase	GO:0008194
455	gene-VFH_IV109440	Vfaba.Hedin2.R1.4g109440.1	63.2747	-1.96742	0.590995	-3.329	0.000871577	0.0396635	yes	-	Strictosidine synthase-like, N-terminal, Strictosidine synthase	STRICTOSIDINE SYNTHASE-RELATED	Calcium-dependent phosphotriesterase	GO:0009058|GO:0016844
456	gene-VFH_IV149480	Vfaba.Hedin2.R1.4g149480.1	1038.49	-1.48373	0.446022	-3.32659	0.000879158	0.0398613	yes	LG4@135.3	Adenylate kinase, active site lid, Adenylate kinase	NUCLEOTIDE KINASE	P-loop containing nucleoside triphosphate hydrolases	GO:0005524|GO:0006139|GO:0019205|GO:0004017|GO:0016776
457	gene-VFH_I172120	Vfaba.Hedin2.R1.1g172120.1	980.752	2.54323	0.764561	3.32639	0.000879774	0.0398613	yes	LG1@168.9	Protein kinase domain	MITOGEN-ACTIVATED KINASE KINASE KINASE	Protein kinase-like (PK-like)	GO:0005524|GO:0004672|GO:0006468
458	gene-VFH_III102480	Vfaba.Hedin2.R1.3g102480.1	2368.07	-0.632273	0.190351	-3.32162	0.000894977	0.0404615	yes	LG3@75.2, LG3@115.2, LG3@119.2, LG3@136.5	AAA+ lid domain, ATPase family associated with various cellular activities (AAA)	AAA ATPASE, PUTATIVE (AFU_ORTHOLOGUE AFUA_2G12920)-RELATED-RELATED	P-loop containing nucleoside triphosphate hydrolases, SMAD/FHA domain	GO:0005515|GO:0005524|GO:0016887
459	gene-VFH_IV125880	Vfaba.Hedin2.R1.4g125880.1	759.579	-0.606201	0.182671	-3.31853	0.000904912	0.0407841	yes	-	Ubiquitin-conjugating enzyme	-	UBC-like	-
460	gene-VFH_II232400	Vfaba.Hedin2.R1.2g232400.1	408.377	-0.661357	0.199313	-3.31818	0.000906051	0.0407841	yes	-	Tim44-like domain	MITOCHONDRIAL IMPORT INNER MEMBRANE TRANSLOCASE SUBUNIT TIM44	NTF2-like	-
461	gene-VFH_I466840	Vfaba.Hedin2.R1.1g466840.1	444.357	1.83598	0.55351	3.31698	0.000909974	0.0408178	yes	-	Leucine rich repeat, Leucine rich repeat, Leucine Rich Repeat, Protein kinase domain	OS04G0122200 PROTEIN	Protein kinase-like (PK-like), L domain-like, L domain-like	GO:0005524|GO:0004672|GO:0006468|GO:0005515
462	gene-VFH_IV002360	Vfaba.Hedin2.R1.4g002360.1	744.988	3.36787	1.01542	3.31674	0.000910742	0.0408178	yes	-	UDP-glucoronosyl and UDP-glucosyl transferase	UDP-GLYCOSYLTRANSFERASE 72B1	UDP-Glycosyltransferase/glycogen phosphorylase	GO:0008194
463	gene-VFH_IV036760	Vfaba.Hedin2.R1.4g036760.1	550.778	-2.10884	0.636058	-3.31548	0.000914851	0.0409134	yes	-	-	OXIDOREDUCTASE, 2OG-FE II OXYGENASE FAMILY PROTEIN	Clavaminate synthase-like	-
464	gene-VFH_I047920	Vfaba.Hedin2.R1.1g047920.1	1253.64	3.28083	0.990092	3.31366	0.00092083	0.0410726	yes	LG1@168.9	UBA-like domain (DUF1421)	RECEPTOR-LIKE KINASE, PUTATIVE (DUF1421)-RELATED	-	-
465	gene-VFH_II044400	Vfaba.Hedin2.R1.2g044400.1	1204.52	0.782703	0.236238	3.31319	0.000922379	0.0410726	yes	LG2@10.7, LG2@50.1	AP2 domain	AP2 DOMAIN CLASS TRANSCRIPTION FACTOR	DNA-binding domain	GO:0003677|GO:0003700|GO:0006355
466	gene-VFH_II160480	Vfaba.Hedin2.R1.2g160480.1	287.515	-0.842644	0.254415	-3.31208	0.000926046	0.0411474	yes	LG2@102.1, LG2@169.8	Protein prenyltransferase alpha subunit repeat, Protein prenyltransferase alpha subunit repeat, Protein prenyltransferase alpha subunit repeat, Protein prenyltransferase alpha subunit repeat, Protein prenyltransferase alpha subunit repeat	PROTEIN FARNESYLTRANSFERASE ALPHA SUBUNIT/RAB GERANYLGERANYL TRANSFERASE ALPHA SUBUNIT	L domain-like, Protein prenylyltransferase	GO:0005515|GO:0008318|GO:0018342
467	gene-VFH_IV207080	Vfaba.Hedin2.R1.4g207080.1	1055.72	-1.47187	0.444484	-3.31141	0.000928274	0.0411581	yes	-	Cupin superfamily (DUF985)	RMLC-LIKE JELLY ROLL FOLD PROTEIN	RmlC-like cupins	-
468	gene-VFH_IV002080	Vfaba.Hedin2.R1.4g002080.1	100.489	2.30189	0.695855	3.308	0.000939642	0.0415731	yes	-	Plant protein of unknown function, Plant protein of unknown function	BNAC04G53230D PROTEIN	-	-
469	gene-VFH_V082080	Vfaba.Hedin2.R1.5g082080.1	4263.87	-1.02326	0.309722	-3.30379	0.000953889	0.0420543	yes	LG5@79.6, LG5@93.9, LG5@107.3	Mitochondrial carrier protein, Mitochondrial carrier protein	SOLUTE CARRIER FAMILY 25 (MITOCHONDRIAL CARRIER PHOSPHATE CARRIER), MEMBER 3, LIKE-RELATED-RELATED	Mitochondrial carrier	GO:0005315|GO:1990547
470	gene-VFH_II020320	Vfaba.Hedin2.R1.2g020320.1	372.16	-3.19221	0.966288	-3.30358	0.000954578	0.0420543	yes	LG2@10.7	Protein of unknown function (DUF642), Protein of unknown function (DUF642)	OS02G0527500 PROTEIN-RELATED	-	-
471	gene-VFH_III110640	Vfaba.Hedin2.R1.3g110640.1	219.989	-1.41033	0.427019	-3.30273	0.000957501	0.0420934	yes	LG3@75.2, LG3@115.2, LG3@119.2, LG3@136.5	-	RRM DOMAIN-CONTAINING PROTEIN	-	-
472	gene-VFH_I119880	Vfaba.Hedin2.R1.1g119880.1	2301.63	-0.67773	0.205438	-3.29895	0.000970465	0.0424918	yes	LG1@168.9	Cytochrome C1 family	CYTOCHROME C1	Cytochrome c1 subunit of cytochrome bc1 complex (Ubiquinol-cytochrome c reductase), transmembrane anchor, Cytochrome c	GO:0009055|GO:0020037
473	gene-VFH_I018960	Vfaba.Hedin2.R1.1g018960.1	5609.37	1.08283	0.328241	3.29889	0.000970667	0.0424918	yes	-	Adenosylmethionine decarboxylase	S-ADENOSYLMETHIONINE DECARBOXYLASE	S-adenosylmethionine decarboxylase	GO:0004014|GO:0008295|GO:0006597
474	gene-VFH_I337520	Vfaba.Hedin2.R1.1g337520.1	42.0241	1.95146	0.591665	3.29826	0.000972873	0.0424986	yes	-	Myb-like DNA-binding domain	TRANSCRIPTION FACTOR KAN2-RELATED	Homeodomain-like	GO:0000976|GO:0006355|GO:0010158|GO:0003677
475	gene-VFH_II163680	Vfaba.Hedin2.R1.2g163680.1	17.4331	4.99996	1.51649	3.29706	0.000977015	0.0425538	yes	-	-	-	-	-
476	gene-VFH_I356960	Vfaba.Hedin2.R1.1g356960.1	427.558	-0.935435	0.283748	-3.29671	0.000978247	0.0425538	yes	-	FAD linked oxidases, C-terminal domain, FAD binding domain	D-2-HYDROXYGLUTARATE DEHYDROGENASE, MITOCHONDRIAL	FAD-binding/transporter-associated domain-like, FAD-linked oxidases, C-terminal domain	GO:0071949|GO:0003824|GO:0050660
477	gene-VFH_I123960	Vfaba.Hedin2.R1.1g123960.1	231.955	-1.0256	0.311249	-3.2951	0.000983879	0.042709	yes	LG1@168.9	Elongation factor Tu domain 2, Elongation factor G C-terminus, Elongation factor Tu GTP binding domain	ELONGATION FACTOR G, MITOCHONDRIAL	EF-G C-terminal domain-like, P-loop containing nucleoside triphosphate hydrolases, Translation proteins	GO:0005525|GO:0003924
478	gene-VFH_I170320	Vfaba.Hedin2.R1.1g170320.1	225.417	8.44192	2.56304	3.29371	0.000988727	0.0428297	yes	LG1@168.9	Methyltransferase domain, Methyltransferase domain	PHOSPHOETHANOLAMINE METHYLTRANSFERASE	S-adenosyl-L-methionine-dependent methyltransferases, S-adenosyl-L-methionine-dependent methyltransferases	GO:0008168|GO:0000234|GO:0006656
479	gene-VFH_II060520	Vfaba.Hedin2.R1.2g060520.1	4208.93	1.14148	0.346777	3.29169	0.000995867	0.0428911	yes	LG2@68.4, LG2@84.5	-	OS05G0353300 PROTEIN	-	GO:0005515
480	gene-VFH_V105520	Vfaba.Hedin2.R1.5g105520.1	83.5914	1.33205	0.404672	3.29168	0.000995891	0.0428911	yes	-	50S ribosome-binding GTPase	GENETIC INTERACTOR OF PROHIBITINS 3, MITOCHONDRIAL	P-loop containing nucleoside triphosphate hydrolases	GO:0005525
481	gene-VFH_VI149200	Vfaba.Hedin2.R1.6g149200.1	51.617	-1.60679	0.488155	-3.29155	0.00099636	0.0428911	yes	LG6@121.0, LG6@169.6	Histidine phosphatase superfamily (branch 1), Histidine phosphatase superfamily (branch 1)	PHOSPHOGLYCERATE MUTASE	Phosphoglycerate mutase-like	GO:0003824|GO:0004619|GO:0006096|GO:0016868
482	gene-VFH_III133960	Vfaba.Hedin2.R1.3g133960.1	1310.19	-0.874058	0.265754	-3.28897	0.00100555	0.0431231	yes	LG3@75.2, LG3@119.2, LG3@136.5	RWP-RK domain, PB1 domain	PROTEIN NLP8	CAD & PB1 domains	GO:0003700|GO:0005515
483	gene-VFH_V194800	Vfaba.Hedin2.R1.5g194800.1	225.262	1.63041	0.495807	3.2884	0.00100759	0.0431231	yes	-	PAP_fibrillin	PLASTID-LIPID-ASSOCIATED PROTEIN 4, CHLOROPLASTIC-RELATED	-	-
484	gene-VFH_IV161160	Vfaba.Hedin2.R1.4g161160.1	875.751	-3.20137	0.973568	-3.28829	0.001008	0.0431231	yes	-	POT family	OLIGOPEPTIDE TRANSPORTER-RELATED	MFS general substrate transporter	GO:0016020|GO:0022857|GO:0055085
485	gene-VFH_II163640	Vfaba.Hedin2.R1.2g163640.1	516.816	2.43201	0.740363	3.28489	0.00102023	0.0435434	yes	LG2@102.1, LG2@169.8, LG2@171.4	Myb-like DNA-binding domain	MYB PROTEIN-RELATED	Homeodomain-like	-
486	gene-VFH_V107400	Vfaba.Hedin2.R1.5g107400.1	26.9034	3.778	1.15029	3.28439	0.00102203	0.0435434	yes	-	Ring finger domain	RING-H2 FINGER PROTEIN ATL51-RELATED	RING/U-box	-
487	gene-VFH_I339360	Vfaba.Hedin2.R1.1g339360.1	1320.95	1.67069	0.508968	3.28249	0.00102893	0.0437474	yes	-	Rx N-terminal domain, NB-ARC domain	DISEASE RESISTANCE PROTEIN RP	P-loop containing nucleoside triphosphate hydrolases, L domain-like	GO:0006952|GO:0043531
488	gene-VFH_IV223520	Vfaba.Hedin2.R1.4g223520.1	229.13	2.21532	0.67616	3.27632	0.00105168	0.0446231	yes	-	Leucine rich repeat, Leucine rich repeat N-terminal domain, Protein tyrosine and serine/threonine kinase	SOMATIC EMBRYOGENESIS RECEPTOR KINASE 1	Protein kinase-like (PK-like), L domain-like	GO:0004672|GO:0005524|GO:0006468|GO:0005515
489	gene-VFH_I137040	Vfaba.Hedin2.R1.1g137040.1	1304.42	-1.13939	0.347983	-3.27426	0.00105938	0.0448579	yes	LG1@168.9	Eukaryotic porin	VOLTAGE-DEPENDENT ANION-SELECTIVE CHANNEL	-	GO:0005741|GO:0055085|GO:0008308|GO:0098656
490	gene-VFH_V097800	Vfaba.Hedin2.R1.5g097800.1	36.0417	1.69185	0.516823	3.27355	0.00106207	0.04488	yes	LG5@107.3	NB-ARC domain	LEUCINE-RICH REPEAT-CONTAINING PROTEIN	P-loop containing nucleoside triphosphate hydrolases, Winged helix DNA-binding domain	GO:0006952|GO:0043531
491	gene-VFH_V029000	Vfaba.Hedin2.R1.5g029000.1	12.5683	-12.9901	3.9702	-3.27189	0.00106831	0.0450116	yes	-	Ndr family	N-MYC DOWNSTREAM REGULATED	alpha/beta-Hydrolases	-
492	gene-VFH_III009080	Vfaba.Hedin2.R1.3g009080.1	32.1121	5.93975	1.81557	3.27157	0.00106953	0.0450116	yes	-	EamA-like transporter family, EamA-like transporter family	WAT1-RELATED PROTEIN	Multidrug resistance efflux transporter EmrE, Multidrug resistance efflux transporter EmrE	GO:0016020|GO:0022857
493	gene-VFH_I377760	Vfaba.Hedin2.R1.1g377760.1	161.825	2.6258	0.803441	3.26819	0.00108237	0.0454265	yes	-	Protein tyrosine and serine/threonine kinase, Protein kinase domain	OS01G0588500 PROTEIN-RELATED	Protein kinase-like (PK-like)	GO:0004672|GO:0005524|GO:0006468
494	gene-VFH_IV008960	Vfaba.Hedin2.R1.4g008960.1	185.21	4.30003	1.31587	3.26782	0.00108378	0.0454265	yes	-	GH3 auxin-responsive promoter	GH3 DOMAIN-CONTAINING PROTEIN	-	-
495	gene-VFH_III149680	Vfaba.Hedin2.R1.3g149680.1	57.5746	3.79608	1.16197	3.26693	0.0010872	0.045462	yes	LG3@136.5, LG3@144.5	Salt stress response/antifungal, Salt stress response/antifungal	CYSTEINE-RICH REPEAT SECRETORY PROTEIN	-	-
496	gene-VFH_V088640	Vfaba.Hedin2.R1.5g088640.1	2689.52	2.21423	0.677868	3.26646	0.00108901	0.045462	yes	LG5@79.6, LG5@107.3	IMP dehydrogenase / GMP reductase domain	INOSINE-5-MONOPHOSPHATE DEHYDROGENASE RELATED	CBS-domain pair, Inosine monophosphate dehydrogenase (IMPDH)	GO:0016491|GO:0003824|GO:0003938|GO:0006164
497	gene-VFH_VI029280	Vfaba.Hedin2.R1.6g029280.1	638.001	-1.11595	0.341721	-3.26568	0.00109202	0.0454955	yes	-	Thioredoxin-like domain, Thioredoxin, Thioredoxin	PROTEIN DISULFIDE ISOMERASE	Thioredoxin-like, Thioredoxin-like, Thioredoxin-like, Thioredoxin-like	GO:0003756
498	gene-VFH_V038560	Vfaba.Hedin2.R1.5g038560.1	1051.53	-1.18279	0.362592	-3.26205	0.00110609	0.0459049	yes	-	Glycosyl transferase family 8	GALACTURONOSYLTRANSFERASE 4-RELATED	Nucleotide-diphospho-sugar transferases	GO:0016757|GO:0047262
499	gene-VFH_IV076360	Vfaba.Hedin2.R1.4g076360.1	698.647	-1.04067	0.319028	-3.262	0.00110628	0.0459049	yes	-	4Fe-4S dicluster domain	NADH DEHYDROGENASE UBIQUINONE IRON-SULFUR PROTEIN 8, MITOCHONDRIAL	4Fe-4S ferredoxins	GO:0016020|GO:0016651|GO:0051539
500	gene-VFH_III213360	Vfaba.Hedin2.R1.3g213360.1	117.114	3.48275	1.06801	3.26098	0.00111029	0.0459792	yes	-	Glutaredoxin	GLUTAREDOXIN	Thioredoxin-like	-
501	gene-VFH_I390280	Vfaba.Hedin2.R1.1g390280.1	860.881	0.892722	0.273875	3.2596	0.00111569	0.0460279	yes	-	AMP-binding enzyme C-terminal domain, AMP-binding enzyme	ACYL-ACTIVATING ENZYME	Acetyl-CoA synthetase-like	-
502	gene-VFH_V020280	Vfaba.Hedin2.R1.5g020280.1	200.467	1.66686	0.511498	3.25879	0.00111889	0.0460279	yes	-	Adenylate kinase	NUCLEOTIDE KINASE	P-loop containing nucleoside triphosphate hydrolases	GO:0005524|GO:0006139|GO:0019205
503	gene-VFH_IV218560	Vfaba.Hedin2.R1.4g218560.1	10.4806	3.52054	1.08041	3.25853	0.00111991	0.0460279	yes	-	Casparian strip membrane protein domain	SEC61 SUBUNIT BETA	-	GO:0005784|GO:0006886
504	gene-VFH_I486240	Vfaba.Hedin2.R1.1g486240.1	1024.12	0.723249	0.221963	3.25842	0.00112035	0.0460279	yes	-	Utp25, U3 small nucleolar RNA-associated SSU processome protein 25	ORF PROTEIN-RELATED	-	GO:0005730|GO:0006364|GO:0034511
505	gene-VFH_II219160	Vfaba.Hedin2.R1.2g219160.1	1873.62	-0.952695	0.292682	-3.25505	0.00113374	0.0464857	yes	-	CRAL/TRIO, N-terminal domain, CRAL/TRIO domain	CRAL-TRIO DOMAIN-CONTAINING PROTEIN YKL091C-RELATED	CRAL/TRIO domain, CRAL/TRIO N-terminal domain	-
506	gene-VFH_I160480	Vfaba.Hedin2.R1.1g160480.1	373.383	-1.16223	0.357253	-3.25324	0.00114098	0.0466901	yes	LG1@168.9	PHD - plant homeodomain finger protein	VIN3-LIKE PROTEIN 2-RELATED	Fibronectin type III	GO:0005515|GO:0010048|GO:0040029
507	gene-VFH_III230400	Vfaba.Hedin2.R1.3g230400.1	216.194	-1.34379	0.413414	-3.25048	0.00115212	0.047053	yes	-	Putative S-adenosyl-L-methionine-dependent methyltransferase	SAM-DEPENDENT METHYLTRANSFERASE	S-adenosyl-L-methionine-dependent methyltransferases, S-adenosyl-L-methionine-dependent methyltransferases	GO:0008168
508	gene-VFH_I353520	Vfaba.Hedin2.R1.1g353520.1	4738.46	-1.323	0.40719	-3.2491	0.0011577	0.0471876	yes	-	3-dehydroquinate synthase	3-DEHYDROQUINATE SYNTHASE	Dehydroquinate synthase-like	GO:0003856|GO:0005737|GO:0009073
509	gene-VFH_U003600	Vfaba.Hedin2.R1.Ung003600.1	309.075	1.3799	0.424801	3.24834	0.00116079	0.0472207	yes	-	Protein similar to CwfJ C-terminus 2, Protein similar to CwfJ C-terminus 1	CWF19, CELL CYCLE CONTROL PROTEIN		-
510	gene-VFH_III012720	Vfaba.Hedin2.R1.3g012720.1	355.292	0.849592	0.26167	3.24681	0.00116707	0.0473701	yes	-	-	BRG-1 ASSOCIATED FACTOR 250 BAF250	ARM repeat	GO:0006338|GO:0016514|GO:0035060
511	gene-VFH_V003560	Vfaba.Hedin2.R1.5g003560.1	636.188	-0.95301	0.293566	-3.24633	0.00116904	0.0473701	yes	-	3-Oxoacyl-[acyl-carrier-protein (ACP)] synthase III, 3-Oxoacyl-[acyl-carrier-protein (ACP)] synthase III C terminal	3-OXOACYL-[ACYL-CARRIER-PROTEIN] SYNTHASE	Thiolase-like	GO:0004315|GO:0006633|GO:0016746
512	gene-VFH_III056040	Vfaba.Hedin2.R1.3g056040.1	1207.72	-0.983981	0.303224	-3.24506	0.00117424	0.0474618	yes	-	Myosin N-terminal SH3-like domain, DIL domain, IQ calmodulin-binding motif, IQ calmodulin-binding motif, IQ calmodulin-binding motif, IQ calmodulin-binding motif, IQ calmodulin-binding motif, Myosin head (motor domain)	MYOSIN	P-loop containing nucleoside triphosphate hydrolases, P-loop containing nucleoside triphosphate hydrolases	GO:0007015|GO:0003774|GO:0005524|GO:0016459|GO:0005515
513	gene-VFH_IV062680	Vfaba.Hedin2.R1.4g062680.1	52.5638	5.36632	1.65389	3.24467	0.00117589	0.0474618	yes	-	PLAT/LH2 domain, Lipoxygenase	LIPOXYGENASE	Lipase/lipooxygenase domain (PLAT/LH2 domain), Lipoxigenase	GO:0016491|GO:0016702|GO:0046872|GO:0005515|GO:0034440
514	gene-VFH_II083240	Vfaba.Hedin2.R1.2g083240.1	12.3344	4.1464	1.27911	3.24163	0.00118846	0.0478253	yes	LG2@84.5, LG2@102.1	Seed dormancy control, bZIP transcription factor	TRANSCRIPTION FACTOR TGA9	Leucine zipper domain	GO:0003700|GO:0006355|GO:0006351|GO:0043565
515	gene-VFH_V026960	Vfaba.Hedin2.R1.5g026960.1	245.968	2.68673	0.828885	3.24138	0.00118951	0.0478253	yes	-	CCT motif	CCT MOTIF FAMILY PROTEIN, EXPRESSED	-	GO:0005515
516	gene-VFH_IV133680	Vfaba.Hedin2.R1.4g133680.1	575.95	2.90802	0.89741	3.24046	0.00119336	0.0478872	yes	-	TLD	-	-	-
517	gene-VFH_U069680	Vfaba.Hedin2.R1.Ung069680.1	1998.33	-0.770288	0.237763	-3.23973	0.00119643	0.0479173	yes	-	Protein adenylyltransferase SelO	PROTEIN ADENYLYLTRANSFERASE SELO, MITOCHONDRIAL		-
518	gene-VFH_III117160	Vfaba.Hedin2.R1.3g117160.1	668.069	-0.989951	0.305791	-3.23734	0.00120648	0.0481139	yes	LG3@75.2, LG3@119.2, LG3@136.5	Phosphoglucomutase/phosphomannomutase, alpha/beta/alpha domain III, Phosphoglucomutase/phosphomannomutase, alpha/beta/alpha domain II, Phosphoglucomutase/phosphomannomutase, alpha/beta/alpha domain I	PHOSPHOHEXOSE MUTASE	Phosphoglucomutase, C-terminal domain, Phosphoglucomutase, first 3 domains, Phosphoglucomutase, first 3 domains, Phosphoglucomutase, first 3 domains	GO:0016868|GO:0071704|GO:0005975
519	gene-VFH_IV237720	Vfaba.Hedin2.R1.4g237720.1	22.1756	-5.55517	1.71619	-3.23692	0.00120829	0.0481139	yes	-	-	STRICTOSIDINE SYNTHASE-RELATED	Calcium-dependent phosphotriesterase	-
520	gene-VFH_I088920	Vfaba.Hedin2.R1.1g088920.1	13.625	6.21388	1.91969	3.23691	0.00120831	0.0481139	yes	LG1@168.9	Domain of unknown function (DUF4408), Cotton fibre expressed protein	COTTON FIBER (DUF761)	-	-
521	gene-VFH_II175320	Vfaba.Hedin2.R1.2g175320.1	145.114	-3.48807	1.07831	-3.23477	0.0012174	0.0482274	yes	LG2@169.8, LG2@171.4	Mechanosensitive ion channel	MECHANOSENSITIVE ION CHANNEL PROTEIN 5	Sm-like ribonucleoproteins	GO:0016020|GO:0055085
522	gene-VFH_II149720	Vfaba.Hedin2.R1.2g149720.1	3929.58	-1.26799	0.392011	-3.23459	0.00121817	0.0482274	yes	LG2@102.1	Putative S-adenosyl-L-methionine-dependent methyltransferase	SAM-DEPENDENT METHYLTRANSFERASE	S-adenosyl-L-methionine-dependent methyltransferases, S-adenosyl-L-methionine-dependent methyltransferases	GO:0008168
523	gene-VFH_I189200	Vfaba.Hedin2.R1.1g189200.2	593.577	0.932439	0.288284	3.23445	0.00121879	0.0482274	yes	-	-	EXPRESSED PROTEIN	Trypsin-like serine proteases	-
524	gene-VFH_IV003320	Vfaba.Hedin2.R1.4g003320.1	867.913	-2.41531	0.746838	-3.23405	0.00122047	0.0482274	yes	-	Plastocyanin-like domain	BLUE COPPER PROTEIN	Cupredoxins	GO:0009055
525	gene-VFH_I339960	Vfaba.Hedin2.R1.1g339960.1	524.584	3.20241	0.99042	3.23338	0.00122333	0.0482483	yes	-	Domain of unknown function (DUF1995)	PROTEIN LOW PSII ACCUMULATION 3, CHLOROPLASTIC	-	-
526	gene-VFH_I182440	Vfaba.Hedin2.R1.1g182440.1	836.129	-0.529708	0.16397	-3.23051	0.00123569	0.0486431	yes	-	Ubiquitin elongating factor core, Ubiquitin elongating factor core, U-box domain	UBIQUITINATION FACTOR E4	RING/U-box	GO:0000151|GO:0030433|GO:0034450|GO:0006511|GO:0016567|GO:0004842
527	gene-VFH_II012560	Vfaba.Hedin2.R1.2g012560.1	19.7678	-9.17682	2.84242	-3.22853	0.0012443	0.0487981	yes	LG2@10.7	Rx N-terminal domain, NB-ARC domain	DISEASE RESISTANCE PROTEIN RP	P-loop containing nucleoside triphosphate hydrolases, L domain-like	GO:0043531|GO:0006952
528	gene-VFH_I481680	Vfaba.Hedin2.R1.1g481680.1	1013.33	-1.04715	0.324343	-3.22852	0.00124434	0.0487981	yes	-	-	S-ADENOSYL-L-METHIONINE-DEPENDENT METHYLTRANSFERASE-RELATED	S-adenosyl-L-methionine-dependent methyltransferases	GO:0008168|GO:0045488
529	gene-VFH_VI035200	Vfaba.Hedin2.R1.6g035200.1	43.3505	2.06248	0.639375	3.22577	0.00125636	0.0491348	yes	-	Dof domain, zinc finger	DOF ZINC FINGER PROTEIN DOF1.4-RELATED	-	GO:0003700|GO:0006355|GO:0003677
530	gene-VFH_I040800	Vfaba.Hedin2.R1.1g040800.1	1202.39	-0.406998	0.126184	-3.22543	0.00125785	0.0491348	yes	-	-	-	-	-
531	gene-VFH_II018120	Vfaba.Hedin2.R1.2g018120.1	1640.21	1.61917	0.502081	3.22493	0.00126005	0.0491348	yes	LG2@10.7	Zinc finger C-x8-C-x5-C-x3-H type (and similar), RNA recognition motif. (a.k.a. RRM, RBD, or RNP domain)	RNA-BINDING (RRM/RBD/RNP MOTIFS)	CCCH zinc finger, RNA-binding domain, RBD	GO:0003723|GO:0003676|GO:0046872
532	gene-VFH_III220440	Vfaba.Hedin2.R1.3g220440.1	301.294	-3.78516	1.17443	-3.22297	0.00126869	0.0493788	yes	-	Domain of unknown function (DUF4217), Helicase conserved C-terminal domain, DEAD/DEAH box helicase	RNA HELICASE	P-loop containing nucleoside triphosphate hydrolases	GO:0003676|GO:0005524|GO:0003724
533	gene-VFH_III144600	Vfaba.Hedin2.R1.3g144600.1	62.7088	2.66679	0.827821	3.22146	0.00127539	0.0494962	yes	LG3@136.5, LG3@144.5	zinc-finger of the FCS-type, C2-C2	FCS-LIKE ZINC FINGER 8	-	-
534	gene-VFH_I479080	Vfaba.Hedin2.R1.1g479080.1	575.984	-1.18044	0.366457	-3.22121	0.00127649	0.0494962	yes	-	Nucleoside transporter	EQUILIBRATIVE NUCLEOSIDE TRANSPORTER	-	GO:0005337|GO:0016020|GO:1901642
535	gene-VFH_IV020480	Vfaba.Hedin2.R1.4g020480.1	327.655	6.09223	1.89234	3.21943	0.00128448	0.0497129	yes	-	Pathogenesis-related protein Bet v 1 family	POLYKETIDE CYCLASE/DEHYDRASE AND LIPID TRANSPORT SUPERFAMILY PROTEIN, POLYKETIDE CYCLASE/DEHYDRASE AND LIPID TRANSPORT SUPERFAMILY PROTEIN	Bet v1-like	GO:0006952
536	gene-VFH_I328200	Vfaba.Hedin2.R1.1g328200.1	1380.02	-2.93633	0.914031	-3.21251	0.00131581	0.0508304		-	UDP-glucose/GDP-mannose dehydrogenase family, NAD binding domain, UDP-glucose/GDP-mannose dehydrogenase family, UDP binding domain, UDP-glucose/GDP-mannose dehydrogenase family, central domain	UDP-GLUCOSE DEHYDROGENASE/UDP-MANNAC DEHYDROGENASE	UDP-glucose/GDP-mannose dehydrogenase C-terminal domain, NAD(P)-binding Rossmann-fold domains, 6-phosphogluconate dehydrogenase C-terminal domain-like	GO:0016616|GO:0051287|GO:0003979
537	gene-VFH_II105760	Vfaba.Hedin2.R1.2g105760.1	5.67997	8.08825	2.51818	3.21194	0.0013184	0.0508358		LG2@102.1	Dimerisation domain, O-methyltransferase domain	O-METHYLTRANSFERASE	S-adenosyl-L-methionine-dependent methyltransferases, Winged helix DNA-binding domain	GO:0008168|GO:0008171|GO:0046983
538	gene-VFH_II004800	Vfaba.Hedin2.R1.2g004800.1	335.631	-1.79539	0.559462	-3.20914	0.00133133	0.0512283		-	Aminotransferase class I and II	CLASS II AMINOTRANSFERASE/8-AMINO-7-OXONONANOATE SYNTHASE	PLP-dependent transferases	GO:0003824|GO:0009058|GO:0030170
539	gene-VFH_II264760	Vfaba.Hedin2.R1.2g264760.1	288.686	-1.04399	0.325366	-3.20866	0.00133353	0.0512283		-	Polypeptide deformylase	PEPTIDE DEFORMYLASE	Peptide deformylase	GO:0042586
540	gene-VFH_IV229880	Vfaba.Hedin2.R1.4g229880.1	56.5219	5.14018	1.60235	3.20789	0.0013371	0.0512687		-	Glycosyl hydrolase family 1	GLYCOSYL HYDROLASE	(Trans)glycosidases	GO:0004553|GO:0005975
541	gene-VFH_I255720	Vfaba.Hedin2.R1.1g255720.1	685.94	2.57463	0.802793	3.20709	0.00134086	0.0512687		-	Glycine rich protein family	OS06G0316800 PROTEIN	-	-
542	gene-VFH_III059720	Vfaba.Hedin2.R1.3g059720.1	14.2971	-8.10677	2.52796	-3.20684	0.00134201	0.0512687		-	AP2 domain	DNA-BINDING DOMAIN	DNA-binding domain	GO:0003700|GO:0009873|GO:0003677|GO:0006355
543	gene-VFH_I457960	Vfaba.Hedin2.R1.1g457960.1	1075.94	2.07552	0.647769	3.2041	0.00135484	0.0516636		qBF1.1	Proline-rich nuclear receptor coactivator motif	SPLICING FACTOR, PROLINE- AND GLUTAMINE-RICH-LIKE	-	-
544	gene-VFH_I232520	Vfaba.Hedin2.R1.1g232520.1	3068.5	-2.61835	0.817424	-3.20317	0.00135922	0.0517352		-	Cytochrome P450	TRANS-CINNAMATE 4-MONOOXYGENASE	Cytochrome P450	GO:0005506|GO:0016705|GO:0004497|GO:0020037
545	gene-VFH_I469440	Vfaba.Hedin2.R1.1g469440.1	315.351	1.89863	0.592929	3.20212	0.00136422	0.0518304		-	GDSL-like Lipase/Acylhydrolase	ZINC FINGER FYVE DOMAIN CONTAINING PROTEIN	SGNH hydrolase	GO:0016788
546	gene-VFH_II165760	Vfaba.Hedin2.R1.2g165760.1	236.596	-0.860086	0.26871	-3.2008	0.00137046	0.0519722		LG2@102.1, LG2@169.8, LG2@171.4	Fms-interacting protein/Thoc5	FMS INTERACTING PROTEIN	-	-
547	gene-VFH_III155760	Vfaba.Hedin2.R1.3g155760.1	150.993	2.89968	0.906619	3.19835	0.00138218	0.0523208		LG3@136.5, LG3@144.5	Peptidase of plants and bacteria	-	-	-
548	gene-VFH_IV141840	Vfaba.Hedin2.R1.4g141840.1	66.1262	-6.55022	2.04859	-3.19742	0.00138662	0.0523931		-	Hydrophobic seed protein	-	Bifunctional inhibitor/lipid-transfer protein/seed storage 2S albumin	-
549	gene-VFH_II174720	Vfaba.Hedin2.R1.2g174720.1	61.8053	4.28338	1.34031	3.19582	0.00139435	0.0525889		LG2@102.1, LG2@169.8, LG2@171.4	WRKY DNA -binding domain	WRKY TRANSCRIPTION FACTOR PROTEIN 1-RELATED	WRKY DNA-binding domain	GO:0003700|GO:0006355|GO:0043565
550	gene-VFH_V058880	Vfaba.Hedin2.R1.5g058880.1	47.1231	5.93326	1.85785	3.19361	0.00140504	0.052896		LG5@79.6, LG5@86.9, LG5@93.9	WRKY DNA -binding domain	WRKY TRANSCRIPTION FACTOR 21-RELATED	WRKY DNA-binding domain	GO:0003700|GO:0006355|GO:0043565
551	gene-VFH_VI139360	Vfaba.Hedin2.R1.6g139360.1	131.512	-1.57648	0.493917	-3.1918	0.00141391	0.0530635		LG6@121.0	Putative GTPase activating protein for Arf, C2 domain	ADP-RIBOSYLATION FACTOR GTPASE-ACTIVATING PROTEIN AGD12	ArfGap/RecO-like zinc finger, C2 domain (Calcium/lipid-binding domain, CaLB)	GO:0005096|GO:0005543
552	gene-VFH_IV066120	Vfaba.Hedin2.R1.4g066120.1	206.225	-1.31609	0.412353	-3.19165	0.00141462	0.0530635		-	Calcium-activated chloride channel	ANOCTAMIN	-	-
553	gene-VFH_V073960	Vfaba.Hedin2.R1.5g073960.1	4013.5	2.37598	0.74457	3.19108	0.00141741	0.053072		LG5@79.6, LG5@86.9, LG5@93.9	Calreticulin family, Calreticulin family	CALRETICULIN AND CALNEXIN	P-domain of calnexin/calreticulin, Concanavalin A-like lectins/glucanases	GO:0005509|GO:0005783|GO:0006457|GO:0051082|GO:0005515
554	gene-VFH_III096280	Vfaba.Hedin2.R1.3g096280.1	201.908	-6.34213	1.98931	-3.1881	0.00143211	0.0534457		LG3@75.2, LG3@119.2, LG3@136.5	Peroxidase	PEROXIDASE 25-RELATED	Heme-dependent peroxidases	GO:0004601|GO:0042744|GO:0006979|GO:0020037
555	gene-VFH_II053520	Vfaba.Hedin2.R1.2g053520.1	9.76336	-5.75501	1.8052	-3.18801	0.00143255	0.0534457		-	-	-	-	-
556	gene-VFH_III047040	Vfaba.Hedin2.R1.3g047040.1	295.189	3.09254	0.970382	3.18693	0.00143793	0.0535501		-	Cytochrome P450	CYTOCHROME P450	Cytochrome P450	GO:0004497|GO:0005506|GO:0016705|GO:0020037
557	gene-VFH_II263840	Vfaba.Hedin2.R1.2g263840.1	63.4239	2.45299	0.770348	3.18427	0.00145122	0.0538982		-	Isochorismatase family	OS02G0276400 PROTEIN	Isochorismatase-like hydrolases	-
558	gene-VFH_U118040	Vfaba.Hedin2.R1.Ung118040.1	127.144	1.32838	0.417202	3.18401	0.00145249	0.0538982		-	PPR repeat, E motif	PENTATRICOPEPTIDE REPEAT-CONTAINING PROTEIN		GO:0005515
559	gene-VFH_II035800	Vfaba.Hedin2.R1.2g035800.1	1524.27	1.70996	0.537626	3.18057	0.00146984	0.0544444		LG2@10.7	Helix-loop-helix DNA-binding domain	TRANSCRIPTION FACTOR PIF3	HLH, helix-loop-helix DNA-binding domain	GO:0003700|GO:0006355|GO:0046983
560	gene-VFH_IV016040	Vfaba.Hedin2.R1.4g016040.1	11.1497	3.52435	1.10836	3.17977	0.0014739	0.0544975		-	GRAS domain family	OSJNBA0084A10.13 PROTEIN-RELATED	-	-
561	gene-VFH_II008080	Vfaba.Hedin2.R1.2g008080.1	870.9	1.29681	0.407961	3.17876	0.00147908	0.0545914		LG2@10.7	ABC transporter transmembrane region, ABC transporter transmembrane region, ABC transporter, ABC transporter	ATP-BINDING CASSETTE SUB-FAMILY C	ABC transporter transmembrane region, ABC transporter transmembrane region, P-loop containing nucleoside triphosphate hydrolases, P-loop containing nucleoside triphosphate hydrolases	GO:0140359|GO:0005524|GO:0016020|GO:0055085|GO:0016887
562	gene-VFH_I379040	Vfaba.Hedin2.R1.1g379040.1	80.87	6.29087	1.98031	3.17671	0.00148958	0.0548812		-	AP2 domain	DNA-BINDING DOMAIN	DNA-binding domain	GO:0003677|GO:0003700|GO:0009873|GO:0006355
563	gene-VFH_II120520	Vfaba.Hedin2.R1.2g120520.1	33.9521	-5.10155	1.60783	-3.17294	0.00150904	0.0553954		LG2@102.1	eIF-6 family, ATPase family associated with various cellular activities (AAA)	AAA ATPASE, PUTATIVE (AFU_ORTHOLOGUE AFUA_2G12920)-RELATED-RELATED	Pentein, P-loop containing nucleoside triphosphate hydrolases	GO:0042256|GO:0043022|GO:0005524|GO:0016887
564	gene-VFH_II105360	Vfaba.Hedin2.R1.2g105360.1	22.6241	5.48054	1.72739	3.17272	0.00151016	0.0553954		LG2@102.1	Dimerisation domain, O-methyltransferase domain	O-METHYLTRANSFERASE	S-adenosyl-L-methionine-dependent methyltransferases, Winged helix DNA-binding domain	GO:0008171|GO:0046983|GO:0008168
565	gene-VFH_I242200	Vfaba.Hedin2.R1.1g242200.1	369.784	-2.779	0.875978	-3.17245	0.00151156	0.0553954		-	Plants and Prokaryotes Conserved (PCC) domain	AT-HOOK MOTIF NUCLEAR-LOCALIZED PROTEIN 15	AF0104/ALDC/Ptd012-like	GO:0003680
566	gene-VFH_V194840	Vfaba.Hedin2.R1.5g194840.1	222.488	1.51494	0.477774	3.17082	0.00152008	0.0556062		-	PAP_fibrillin	PLASTID-LIPID-ASSOCIATED PROTEIN 4, CHLOROPLASTIC-RELATED	-	-
567	gene-VFH_II088440	Vfaba.Hedin2.R1.2g088440.1	1669.31	2.33241	0.735701	3.17033	0.00152268	0.0556062		LG2@102.1	Leucine rich repeat, Protein kinase domain	LEUCINE-RICH REPEAT RECEPTOR PROTEIN KINASE EMS1	Protein kinase-like (PK-like), L domain-like	GO:0004672|GO:0006468|GO:0005524|GO:0005515
568	gene-VFH_I075480	Vfaba.Hedin2.R1.1g075480.1	22.1218	2.77325	0.875222	3.16862	0.00153165	0.0558349		LG1@168.9	Ubiquitin-conjugating enzyme	(E3-INDEPENDENT) E2 UBIQUITIN-CONJUGATING ENZYME	UBC-like	-
569	gene-VFH_IV129640	Vfaba.Hedin2.R1.4g129640.1	1623.25	1.99116	0.62876	3.1668	0.00154126	0.0560866		-	Acetamidase/Formamidase family	FORMAMIDASE C869.04-RELATED	Acetamidase/Formamidase-like	GO:0016811
570	gene-VFH_III137200	Vfaba.Hedin2.R1.3g137200.1	21.4914	-6.48754	2.04917	-3.16593	0.00154586	0.0561554		LG3@75.2, LG3@119.2, LG3@136.5, LG3@144.5	BAR domain of APPL family, Ankyrin repeats (3 copies), Putative GTPase activating protein for Arf	CENTAURIN/ARF	ArfGap/RecO-like zinc finger, PH domain-like, Ankyrin repeat, BAR/IMD domain-like	GO:0005515|GO:0005737|GO:0005096
571	gene-VFH_I210760	Vfaba.Hedin2.R1.1g210760.1	3320.34	-1.92844	0.609435	-3.16431	0.0015545	0.0562547		-	Cellulase (glycosyl hydrolase family 5)	FASCIN	(Trans)glycosidases, Actin-crosslinking proteins	GO:0004553|GO:0071704|GO:0007015|GO:0051015
572	gene-VFH_IV081160	Vfaba.Hedin2.R1.4g081160.2	128.594	1.51397	0.478474	3.16416	0.00155532	0.0562547		-	TIR domain, NB-ARC domain	LEUCINE-RICH REPEAT-CONTAINING PROTEIN	P-loop containing nucleoside triphosphate hydrolases, Toll/Interleukin receptor TIR domain, L domain-like, L domain-like	GO:0043531|GO:0006952|GO:0007165
573	gene-VFH_II191520	Vfaba.Hedin2.R1.2g191520.1	2334.41	-0.787989	0.249077	-3.16363	0.00155815	0.0562547		-	-	OS08G0519400 PROTEIN	Apolipoprotein A-I, Tropomyosin	-
574	gene-VFH_III074840	Vfaba.Hedin2.R1.3g074840.1	36.0661	5.68285	1.79645	3.16338	0.00155946	0.0562547		LG3@75.2, LG3@119.2	Protein of unknown function (DUF789)	T15D22.8	-	-
575	gene-VFH_U039000	Vfaba.Hedin2.R1.Ung039000.1	186.169	5.05835	1.59941	3.16263	0.00156349	0.0563019		-	Protein tyrosine and serine/threonine kinase, Wall-associated kinase, Wall-associated receptor kinase galacturonan-binding	WALL-ASSOCIATED RECEPTOR KINASE-LIKE 21		GO:0005509|GO:0004674|GO:0016020|GO:0004672|GO:0006468|GO:0005524|GO:0030247|GO:0007166
576	gene-VFH_II155800	Vfaba.Hedin2.R1.2g155800.1	307.469	5.78949	1.83153	3.16101	0.00157224	0.0563967		LG2@102.1, LG2@169.8	AP2 domain	DNA-BINDING DOMAIN	DNA-binding domain	GO:0003677|GO:0003700|GO:0009873|GO:0006355
577	gene-VFH_II276200	Vfaba.Hedin2.R1.2g276200.1	5457.94	-1.1387	0.360239	-3.16097	0.00157246	0.0563967		-	ATPsynthase alpha/beta subunit N-term extension, ATP synthase alpha/beta family, beta-barrel domain, ATP synthase alpha/beta family, nucleotide-binding domain	V-TYPE PROTON ATPASE CATALYTIC SUBUNIT A	P-loop containing nucleoside triphosphate hydrolases, N-terminal domain of alpha and beta subunits of F1 ATP synthase, C-terminal domain of alpha and beta subunits of F1 ATP synthase	GO:0046034|GO:1902600|GO:0005524|GO:0046961|GO:0033180
578	gene-VFH_I110160	Vfaba.Hedin2.R1.1g110160.1	9.3996	5.09825	1.61325	3.16023	0.00157643	0.0563967		-	-	-	-	-
579	gene-VFH_VI188680	Vfaba.Hedin2.R1.6g188680.1	27.7203	-2.13036	0.674201	-3.15983	0.00157861	0.0563967		qFB6.2	GrpE	GRPE PROTEIN	Coiled-coil domain of nucleotide exchange factor GrpE, Head domain of nucleotide exchange factor GrpE	GO:0000774|GO:0006457|GO:0042803|GO:0051087
580	gene-VFH_IV027080	Vfaba.Hedin2.R1.4g027080.1	1904.33	-3.20415	1.01409	-3.15962	0.00157974	0.0563967		-	C2 domain	INGRESSION PROTEIN FIC1	C2 domain (Calcium/lipid-binding domain, CaLB)	-
581	gene-VFH_V096920	Vfaba.Hedin2.R1.5g096920.1	315.717	-1.24733	0.394884	-3.15872	0.00158464	0.0564743		LG5@107.3	EamA-like transporter family, EamA-like transporter family	WAT1-RELATED PROTEIN	Multidrug resistance efflux transporter EmrE, Multidrug resistance efflux transporter EmrE	GO:0016020|GO:0022857
582	gene-VFH_I473520	Vfaba.Hedin2.R1.1g473520.1	135.496	3.20903	1.01633	3.15748	0.0015914	0.0566178		-	VQ motif	VQ MOTIF-CONTAINING PROTEIN 11-LIKE	-	-
583	gene-VFH_V105680	Vfaba.Hedin2.R1.5g105680.1	1060.4	2.83492	0.898306	3.15585	0.00160032	0.0566433		-	Rx N-terminal domain, Leucine rich repeat, NB-ARC domain	PLANT BROAD-SPECTRUM MILDEW RESISTANCE PROTEIN RPW8	P-loop containing nucleoside triphosphate hydrolases, L domain-like	GO:0050832|GO:0005515|GO:0043531
584	gene-VFH_II000400	Vfaba.Hedin2.R1.2g000400.1	732.994	-0.568708	0.180227	-3.1555	0.00160221	0.0566433		-	NAD dependent epimerase/dehydratase family	NAD DEPENDENT EPIMERASE/DEHYDRATASE	NAD(P)-binding Rossmann-fold domains	-
585	gene-VFH_II000480	Vfaba.Hedin2.R1.2g000480.1	732.994	-0.568708	0.180227	-3.1555	0.00160221	0.0566433		-	NAD dependent epimerase/dehydratase family	NAD DEPENDENT EPIMERASE/DEHYDRATASE	NAD(P)-binding Rossmann-fold domains	-
586	gene-VFH_I402240	Vfaba.Hedin2.R1.1g402240.1	44.2224	2.97405	0.942542	3.15535	0.00160306	0.0566433		-	-	EXPRESSED PROTEIN-RELATED-RELATED	-	-
587	gene-VFH_I360880	Vfaba.Hedin2.R1.1g360880.1	663.781	-0.451254	0.143039	-3.15475	0.00160634	0.0566626		-	NUC130/3NT domain, SDA1	HSDA/SDA1-RELATED	ARM repeat	GO:0000055|GO:0042273
588	gene-VFH_III094080	Vfaba.Hedin2.R1.3g094080.1	843.665	-0.554675	0.175884	-3.15364	0.00161248	0.0567823		LG3@75.2, LG3@119.2, LG3@136.5	tRNA synthetases class I (E and Q), anti-codon binding domain, tRNA synthetases class I (E and Q), catalytic domain	GLUTAMINE-TRNA LIGASE	Nucleotidylyl transferase, Ribosomal protein L25-like, GST C-terminal domain-like	GO:0000166|GO:0004812|GO:0005524|GO:0043039|GO:0006412|GO:0004818|GO:0005737|GO:0006424|GO:0006418
589	gene-VFH_V030240	Vfaba.Hedin2.R1.5g030240.1	273.877	2.44237	0.774861	3.152	0.00162154	0.0570044		-	-	INNER MEMBRANE PROTEIN DEDA-RELATED	-	-
590	gene-VFH_I084200	Vfaba.Hedin2.R1.1g084200.1	10.0504	3.72715	1.18277	3.1512	0.00162598	0.0570096		LG1@168.9	-	LEUCINE-RICH REPEAT-CONTAINING PROTEIN DDB_G0281931-RELATED	-	-
591	gene-VFH_I338960	Vfaba.Hedin2.R1.1g338960.1	478.739	1.94211	0.616349	3.15099	0.00162719	0.0570096		-	E motif, DYW family of nucleic acid deaminases, PPR repeat family, PPR repeat family, PPR repeat, PPR repeat, PPR repeat, PPR repeat	PENTATRICOPEPTIDE REPEAT-CONTAINING PROTEIN	-	GO:0008270|GO:0005515
592	gene-VFH_U058960	Vfaba.Hedin2.R1.Ung058960.1	302.911	3.18599	1.01132	3.15034	0.00163078	0.0570387		-	GMC oxidoreductase, GMC oxidoreductase	OSJNBA0019K04.7 PROTEIN		GO:0016614|GO:0050660
593	gene-VFH_I088560	Vfaba.Hedin2.R1.1g088560.1	412.317	1.5515	0.492809	3.14829	0.0016423	0.0573448		LG1@168.9	Ion transport protein	CYCLIC NUCLEOTIDE-GATED ION CHANNEL 15-RELATED-RELATED	Voltage-gated potassium channels, cAMP-binding domain-like	GO:0005216|GO:0006811|GO:0016020|GO:0055085
594	gene-VFH_V145720	Vfaba.Hedin2.R1.5g145720.1	29.4622	-6.48233	2.0604	-3.14616	0.0016543	0.0576667		-	-	-	-	-
595	gene-VFH_I095440	Vfaba.Hedin2.R1.1g095440.1	47.7146	4.40109	1.39982	3.14403	0.00166639	0.0578567		LG1@168.9	Trypsin and protease inhibitor	KUNITZ TRYPSIN INHIBITOR 2	STI-like	GO:0004866
596	gene-VFH_III200480	Vfaba.Hedin2.R1.3g200480.1	791.707	-0.845701	0.268993	-3.14395	0.00166682	0.0578567		-	C2H2 type zinc-finger (2 copies)	ZINC FINGER PROTEIN 622	beta-beta-alpha zinc fingers	-
597	gene-VFH_IV020440	Vfaba.Hedin2.R1.4g020440.1	66.2015	4.17642	1.3285	3.14372	0.00166814	0.0578567		-	Pathogenesis-related protein Bet v 1 family	POLYKETIDE CYCLASE/DEHYDRASE AND LIPID TRANSPORT SUPERFAMILY PROTEIN, POLYKETIDE CYCLASE/DEHYDRASE AND LIPID TRANSPORT SUPERFAMILY PROTEIN	Bet v1-like	GO:0006952
598	gene-VFH_I311240	Vfaba.Hedin2.R1.1g311240.1	73.5289	2.71761	0.864735	3.14271	0.00167393	0.0579605		qFB1.2	UDP-glucoronosyl and UDP-glucosyl transferase	GLUCOSYL/GLUCURONOSYL TRANSFERASES	UDP-Glycosyltransferase/glycogen phosphorylase	GO:0008194
599	gene-VFH_IV108680	Vfaba.Hedin2.R1.4g108680.1	200.978	-0.871723	0.277656	-3.13958	0.00169189	0.0584846		-	CHD5-like protein	TAIL-ANCHORED PROTEIN INSERTION RECEPTOR WRB	-	GO:0071816
600	gene-VFH_I015560	Vfaba.Hedin2.R1.1g015560.1	692.714	1.34166	0.427635	3.13739	0.00170458	0.0588252		-	NAF domain, Protein kinase domain	CALCIUM/CALMODULIN-DEPENDENT PROTEIN KINASE KINASE-RELATED	Protein kinase-like (PK-like)	GO:0004672|GO:0006468|GO:0005524|GO:0007165
601	gene-VFH_I374800	Vfaba.Hedin2.R1.1g374800.1	152.111	1.0296	0.328328	3.13588	0.00171339	0.0590306		-	-	DNA DAMAGE-REPAIR/TOLERATION PROTEIN DRT100	L domain-like	GO:0005515
602	gene-VFH_I087760	Vfaba.Hedin2.R1.1g087760.1	266.676	2.73086	0.871218	3.13453	0.00172129	0.0592045		LG1@168.9	Ion transport protein	CYCLIC NUCLEOTIDE-GATED ION CHANNEL 15-RELATED-RELATED	Voltage-gated potassium channels, cAMP-binding domain-like	GO:0005216|GO:0006811|GO:0016020|GO:0055085
603	gene-VFH_I212400	Vfaba.Hedin2.R1.1g212400.1	28.7312	-5.9555	1.90145	-3.13208	0.00173573	0.0596021		-	Carbohydrate-binding module 48 (Isoamylase N-terminal domain), Alpha amylase, catalytic domain, Sugar (and other) transporter	GLYCOGEN DEBRANCHING ENZYME	(Trans)glycosidases, MFS general substrate transporter	GO:0022857|GO:0005975|GO:0016020|GO:0055085|GO:0004553
604	gene-VFH_V196320	Vfaba.Hedin2.R1.5g196320.1	973.702	-0.51687	0.165088	-3.13088	0.00174283	0.0596489		-	RNA recognition motif. (a.k.a. RRM, RBD, or RNP domain), RNA recognition motif. (a.k.a. RRM, RBD, or RNP domain), RNA recognition motif. (a.k.a. RRM, RBD, or RNP domain)	HETEROGENEOUS NUCLEAR RIBONUCLEOPROTEIN	RNA-binding domain, RBD, RNA-binding domain, RBD	GO:0003676|GO:0003723
605	gene-VFH_I246360	Vfaba.Hedin2.R1.1g246360.1	515.876	-0.688576	0.22001	-3.12975	0.00174957	0.0596489		-	Maintenance of mitochondrial structure and function, JAB1/Mov34/MPN/PAD-1 ubiquitin protease	EUKARYOTIC TRANSLATION INITIATION FACTOR 3 SUBUNIT F-RELATED	-	GO:0005838|GO:0005515|GO:0008233|GO:0008237
606	gene-VFH_II072280	Vfaba.Hedin2.R1.2g072280.1	7.56259	5.63417	1.80052	3.12919	0.00175291	0.0596489		LG2@84.5, LG2@102.1	XH domain	RIBONUCLEASE P SUBUNIT P38	-	GO:0080188
607	gene-VFH_II073440	Vfaba.Hedin2.R1.2g073440.1	15.4744	3.03292	0.969362	3.12878	0.00175533	0.0596489		LG2@84.5, LG2@102.1	Protein of unknown function, DUF604	FRINGE-RELATED	-	-
608	gene-VFH_I393800	Vfaba.Hedin2.R1.1g393800.1	322.272	-1.30482	0.417049	-3.12871	0.00175576	0.0596489		-	NADH:flavin oxidoreductase / NADH oxidase family	NADH OXIDOREDUCTASE-RELATED	FMN-linked oxidoreductases	GO:0010181|GO:0016491
609	gene-VFH_IV079120	Vfaba.Hedin2.R1.4g079120.1	556.568	1.83695	0.587149	3.12859	0.00175647	0.0596489		-	ABC transporter transmembrane region, ABC transporter transmembrane region, ABC transporter, ABC transporter	ATP-BINDING CASSETTE SUB-FAMILY C	ABC transporter transmembrane region, ABC transporter transmembrane region, P-loop containing nucleoside triphosphate hydrolases, P-loop containing nucleoside triphosphate hydrolases	GO:0005524|GO:0016887|GO:0016020|GO:0055085|GO:0140359
610	gene-VFH_II127680	Vfaba.Hedin2.R1.2g127680.1	876.853	-2.68256	0.85747	-3.12846	0.00175726	0.0596489		LG2@102.1	Alcohol dehydrogenase GroES-like domain, Zinc-binding dehydrogenase	ALCOHOL DEHYDROGENASE	NAD(P)-binding Rossmann-fold domains, GroES-like, GroES-like	GO:0008270|GO:0016491
611	gene-VFH_IV185200	Vfaba.Hedin2.R1.4g185200.1	240.096	-1.0184	0.325805	-3.12581	0.00177319	0.0599929		-	Protein of unknown function (DUF1749)	UPF0613 PROTEIN PB24D3.06C	alpha/beta-Hydrolases	-
612	gene-VFH_I090600	Vfaba.Hedin2.R1.1g090600.1	56.1279	2.27904	0.729118	3.12574	0.00177356	0.0599929		LG1@168.9	Glycosyl hydrolase family 1	GLYCOSYL HYDROLASE	(Trans)glycosidases	GO:0004553|GO:0005975
613	gene-VFH_IV165440	Vfaba.Hedin2.R1.4g165440.1	18.62	-6.46875	2.06978	-3.12533	0.00177609	0.0599929		-	-	ATP-BINDING CASSETTE SUB-FAMILY C	P-loop containing nucleoside triphosphate hydrolases	-
614	gene-VFH_V145280	Vfaba.Hedin2.R1.5g145280.1	797.682	2.20819	0.707018	3.12325	0.00178865	0.0602211		-	NLI interacting factor-like phosphatase	DULLARD PROTEIN PHOSPHATASE	HAD-like	-
615	gene-VFH_U017440	Vfaba.Hedin2.R1.Ung017440.1	38.3645	2.44493	0.782817	3.12325	0.00178866	0.0602211		-	0			-
616	gene-VFH_IV210120	Vfaba.Hedin2.R1.4g210120.1	131.473	1.20221	0.385014	3.12252	0.00179313	0.0602736		-	MBOAT, membrane-bound O-acyltransferase family	STEROL O-ACYLTRANSFERASE	-	GO:0004144|GO:0019432|GO:0008374
617	gene-VFH_V069760	Vfaba.Hedin2.R1.5g069760.1	241.482	1.64439	0.52683	3.1213	0.00180057	0.0604255		LG5@79.6, LG5@86.9, LG5@93.9	C-JID domain, Leucine rich repeat, TIR domain, NB-ARC domain	LEUCINE-RICH REPEAT-CONTAINING PROTEIN	P-loop containing nucleoside triphosphate hydrolases, Toll/Interleukin receptor TIR domain, L domain-like, L domain-like	GO:0005515|GO:0043531|GO:0006952|GO:0007165
618	gene-VFH_I255360	Vfaba.Hedin2.R1.1g255360.1	1838.12	3.09151	0.991006	3.11957	0.00181115	0.0605879		-	Glycine rich protein family	NODULIN-24	-	-
619	gene-VFH_III225760	Vfaba.Hedin2.R1.3g225760.1	1215	-0.995618	0.319154	-3.11955	0.00181126	0.0605879		-	RNA recognition motif. (a.k.a. RRM, RBD, or RNP domain), RNA recognition motif. (a.k.a. RRM, RBD, or RNP domain), RNA recognition motif. (a.k.a. RRM, RBD, or RNP domain)	TRNA SELENOCYSTEINE 1-ASSOCIATED PROTEIN 1-RELATED-RELATED	RNA-binding domain, RBD, RNA-binding domain, RBD	GO:0003676|GO:0003723
620	gene-VFH_VI016320	Vfaba.Hedin2.R1.6g016320.1	558.961	2.25623	0.723536	3.11835	0.00181869	0.0607385		-	MatE	MULTIDRUG RESISTANCE PROTEIN	-	GO:0015297|GO:0016020|GO:0042910|GO:0055085
621	gene-VFH_II250400	Vfaba.Hedin2.R1.2g250400.1	216.045	-0.879737	0.282288	-3.11646	0.00183039	0.0609208		-	Triose-phosphate Transporter family	SOLUTE CARRIER FAMILY 35	-	-
622	gene-VFH_II003560	Vfaba.Hedin2.R1.2g003560.1	169.75	-1.97318	0.633193	-3.11624	0.00183175	0.0609208		-	Plant invertase/pectin methylesterase inhibitor	PECTINESTERASE INHIBITOR-LIKE	Plant invertase/pectin methylesterase inhibitor	GO:0004857
623	gene-VFH_IV240320	Vfaba.Hedin2.R1.4g240320.1	571.67	-0.931148	0.298824	-3.11604	0.00183298	0.0609208		-	Nucleoside transporter	EQUILIBRATIVE NUCLEOSIDE TRANSPORTER	-	GO:0005337|GO:0016020|GO:1901642
624	gene-VFH_III051760	Vfaba.Hedin2.R1.3g051760.1	108.333	1.81098	0.581337	3.11521	0.00183815	0.060974		-	Myb-like DNA-binding domain	SWI/SNF COMPLEX-RELATED	Homeodomain-like	GO:0003677
625	gene-VFH_I070240	Vfaba.Hedin2.R1.1g070240.1	68.0147	2.16733	0.695809	3.11484	0.00184047	0.060974		LG1@168.9	Hsp20/alpha crystallin family	21.7 KDA CLASS VI HEAT SHOCK PROTEIN	HSP20-like chaperones	-
626	gene-VFH_I097960	Vfaba.Hedin2.R1.1g097960.1	50.0199	3.16871	1.01758	3.11398	0.00184584	0.0610543		LG1@168.9	Salt stress response/antifungal, Salt stress response/antifungal, Salt stress response/antifungal, Salt stress response/antifungal, Protein kinase domain	PROMASTIGOTE SURFACE ANTIGEN PROTEIN PSA	Protein kinase-like (PK-like)	GO:0004672|GO:0005524|GO:0006468
627	gene-VFH_IV218800	Vfaba.Hedin2.R1.4g218800.1	242.878	-3.90907	1.25575	-3.11293	0.00185238	0.061173		-	Glycosyl hydrolases family 16	XYLOGLUCAN ENDOTRANSGLUCOSYLASE/HYDROLASE PROTEIN 8-RELATED	Concanavalin A-like lectins/glucanases	GO:0004553|GO:0005975
628	gene-VFH_VI031560	Vfaba.Hedin2.R1.6g031560.1	2.37797	9.24219	2.96966	3.11221	0.00185692	NA		-	Protein kinase domain	MITOGEN-ACTIVATED PROTEIN KINASE	Protein kinase-like (PK-like)	GO:0005524|GO:0004672|GO:0006468
629	gene-VFH_III005920	Vfaba.Hedin2.R1.3g005920.1	81.5274	-1.46342	0.470267	-3.11189	0.00185894	0.0612918		-	Survival motor neuron (SMN) interacting protein 1 (SIP1)	GEMIN2	-	GO:0000387
630	gene-VFH_U044200	Vfaba.Hedin2.R1.Ung044200.1	22.6127	3.95413	1.27142	3.11002	0.00187073	0.0615823		-	0	FASCIN		GO:0007015|GO:0051015
631	gene-VFH_I294960	Vfaba.Hedin2.R1.1g294960.1	1625.94	-1.46042	0.469831	-3.1084	0.00188105	0.0617276		-	-	TRANSMEMBRANE PROTEIN DDB_G0292058	-	-
632	gene-VFH_III234320	Vfaba.Hedin2.R1.3g234320.1	46.8437	-2.0445	0.657819	-3.10799	0.00188363	0.0617276		-	SWIM zinc finger	-	-	GO:0008270
633	gene-VFH_V191480	Vfaba.Hedin2.R1.5g191480.1	73.3388	-8.05281	2.59106	-3.10792	0.00188408	0.0617276		-	Lipase (class 3)	PHOSPHOLIPASE A1 PLIP2, CHLOROPLASTIC	alpha/beta-Hydrolases	GO:0006629|GO:0008970
634	gene-VFH_III146440	Vfaba.Hedin2.R1.3g146440.1	35.3984	4.17471	1.34428	3.10553	0.00189937	0.0620369		LG3@136.5, LG3@144.5	Leucine rich repeat, Leucine rich repeat, Leucine rich repeat, Leucine rich repeat, Leucine Rich Repeat	LRR RECEPTOR-LIKE KINASE	L domain-like, L domain-like	GO:0005515
635	gene-VFH_U071040	Vfaba.Hedin2.R1.Ung071040.1	633.827	-1.0147	0.326741	-3.10551	0.00189952	0.0620369		-	Thioredoxin-like domain, Thioredoxin	PROTEIN DISULFIDE ISOMERASE		-
636	gene-VFH_I440560	Vfaba.Hedin2.R1.1g440560.1	95.1368	-1.20785	0.389042	-3.10468	0.00190482	0.0621122		-	Glycolipid transfer protein (GLTP)	GLYCOLIPID TRANSFER PROTEIN-RELATED	Glycolipid transfer protein, GLTP	GO:0005737|GO:0120009|GO:0120013
637	gene-VFH_III160520	Vfaba.Hedin2.R1.3g160520.1	4.17133	-6.10544	1.96727	-3.10352	0.00191236	NA		-	-	-	-	-
638	gene-VFH_III146480	Vfaba.Hedin2.R1.3g146480.1	369.578	4.38614	1.4136	3.10281	0.00191692	0.0623042		LG3@136.5, LG3@144.5	Leucine rich repeat, Leucine rich repeat, Leucine rich repeat, Leucine rich repeat, Leucine rich repeat, Leucine rich repeat, Leucine rich repeat, Leucine rich repeat, Leucine Rich repeat, Leucine Rich repeat, Leucine rich repeat N-terminal domain	LRR RECEPTOR-LIKE SERINE/THREONINE-PROTEIN KINASE-RELATED	L domain-like, L domain-like, L domain-like	GO:0005515
639	gene-VFH_I061720	Vfaba.Hedin2.R1.1g061720.1	421.467	-0.98024	0.315959	-3.10243	0.0019194	0.0623042		LG1@168.9	Dcp1-like decapping family	TRANSCRIPTION FACTOR SMIF DECAPPING ENZYME DCP1	PH domain-like	GO:0000290|GO:0008047|GO:0043085
640	gene-VFH_III209440	Vfaba.Hedin2.R1.3g209440.1	13653.6	3.69484	1.19113	3.10196	0.00192241	0.0623042		-	-	CHLOROPHYLL A/B BINDING PROTEIN	Chlorophyll a-b binding protein	GO:0009765|GO:0016020
641	gene-VFH_III207400	Vfaba.Hedin2.R1.3g207400.1	392.674	-2.36619	0.762815	-3.10191	0.00192275	0.0623042		-	Endomembrane protein 70	TRANSMEMBRANE 9 SUPERFAMILY PROTEIN, TRANSMEMBRANE 9 SUPERFAMILY PROTEIN	MFS general substrate transporter	GO:0016020
642	gene-VFH_I356800	Vfaba.Hedin2.R1.1g356800.1	3.85865	6.27601	2.02372	3.10122	0.00192725	NA		-	K-box region, SRF-type transcription factor (DNA-binding and dimerisation domain)	SERUM RESPONSE FACTOR HOMOLOG	SRF-like	GO:0003700|GO:0005634|GO:0006355|GO:0000977|GO:0045944|GO:0003677|GO:0046983
643	gene-VFH_I407320	Vfaba.Hedin2.R1.1g407320.1	210.913	1.89445	0.611346	3.09882	0.0019429	0.0628589		-	zinc-finger of the FCS-type, C2-C2	OS02G0174800 PROTEIN	-	-
644	gene-VFH_III041720	Vfaba.Hedin2.R1.3g041720.1	178.449	-1.01237	0.326802	-3.0978	0.00194965	0.0629789		-	Acylphosphatase	ACYLPHOSPHATASE	Acylphosphatase/BLUF domain-like	GO:0003998
645	gene-VFH_IV048360	Vfaba.Hedin2.R1.4g048360.1	592.057	3.20717	1.03634	3.09471	0.00197009	0.0635265		-	WRKY DNA -binding domain	WRKY TRANSCRIPTION FACTOR 30-RELATED-RELATED	WRKY DNA-binding domain	GO:0003700|GO:0006355|GO:0043565
646	gene-VFH_II102600	Vfaba.Hedin2.R1.2g102600.1	45.2214	-1.83567	0.593242	-3.09431	0.00197274	0.0635265		LG2@102.1	-	OS06G0608100 PROTEIN	-	-
647	gene-VFH_U014960	Vfaba.Hedin2.R1.Ung014960.1	666.951	-0.823715	0.266264	-3.0936	0.00197743	0.0635787		-	Thioredoxin	GEO12009P1		GO:0015035
648	gene-VFH_II140280	Vfaba.Hedin2.R1.2g140280.2	325.168	2.70852	0.876284	3.09092	0.00199538	0.0640563		LG2@102.1	WRKY DNA -binding domain	WRKY TRANSCRIPTION FACTOR 21-RELATED	WRKY DNA-binding domain	GO:0003700|GO:0006355|GO:0043565
649	gene-VFH_II021880	Vfaba.Hedin2.R1.2g021880.1	6902.13	-1.19513	0.38682	-3.08963	0.00200404	0.0641505		LG2@10.7	Mitochondrial carrier protein, Mitochondrial carrier protein, Mitochondrial carrier protein	ADP, ATP CARRIER PROTEIN 1-RELATED-RELATED	Mitochondrial carrier	GO:0055085|GO:0005471|GO:0005743|GO:0140021|GO:1990544
650	gene-VFH_I048960	Vfaba.Hedin2.R1.1g048960.1	51.9023	2.97002	0.96138	3.08933	0.00200608	0.0641505		LG1@168.9	Legume lectin domain, Protein kinase domain	-	Protein kinase-like (PK-like), Concanavalin A-like lectins/glucanases	GO:0004672|GO:0005524|GO:0006468|GO:0030246
651	gene-VFH_II178160	Vfaba.Hedin2.R1.2g178160.1	5.0292	-7.67635	2.48498	-3.0891	0.00200761	0.0641505		-	AP2 domain	ETHYLENE-RESPONSIVE TRANSCRIPTION FACTOR ERF042-RELATED	DNA-binding domain	GO:0003677|GO:0003700|GO:0006355
652	gene-VFH_I249360	Vfaba.Hedin2.R1.1g249360.1	237.567	-1.13521	0.367594	-3.08823	0.00201355	0.0642413		-	Omp85 superfamily domain	SORTING AND ASSEMBLY MACHINERY SAMM50 PROTEIN FAMILY MEMBER	-	GO:0019867
653	gene-VFH_VI004800	Vfaba.Hedin2.R1.6g004800.1	1842.46	2.07779	0.672974	3.08747	0.00201865	0.064305		-	Sigma-70, region 4, Sigma-70 region 2, Sigma-70 region 3	RNA POLYMERASE SIGMA FACTOR RPO	Sigma2 domain of RNA polymerase sigma factors, Sigma3 and sigma4 domains of RNA polymerase sigma factors, Sigma3 and sigma4 domains of RNA polymerase sigma factors	GO:0003700|GO:0006352|GO:0006355
654	gene-VFH_I360360	Vfaba.Hedin2.R1.1g360360.1	19.4827	-3.7617	1.21897	-3.08596	0.00202896	0.0643526		-	-	EXPRESSED PROTEIN	-	-
655	gene-VFH_VI026800	Vfaba.Hedin2.R1.6g026800.1	23.1884	3.22765	1.04603	3.08563	0.0020312	0.0643526		-	Associated with HOX, Homeobox KN domain	HOMEOBOX PROTEIN TRANSCRIPTION FACTORS	Homeodomain-like	GO:0003677|GO:0006355
656	gene-VFH_I391160	Vfaba.Hedin2.R1.1g391160.1	174.19	-0.720232	0.233429	-3.08544	0.00203252	0.0643526		-	-	OSJNBA0013K16.11 PROTEIN	-	-
657	gene-VFH_VI115120	Vfaba.Hedin2.R1.6g115120.2	1532.89	0.605751	0.196344	3.08515	0.00203453	0.0643526		-	Williams-Beuren syndrome DDT (WSD), D-TOX E motif, WSTF, HB1, Itc1p, MBD9 motif 1, HB1, ASXL, restriction endonuclease HTH domain, DDT domain, Homeodomain	HOMEOBOX-DDT DOMAIN PROTEIN RLT2	Homeodomain-like	GO:0006357|GO:0006355|GO:0003677
658	gene-VFH_IV032040	Vfaba.Hedin2.R1.4g032040.1	314.421	2.24477	0.727647	3.08498	0.00203569	0.0643526		-	Signal peptide peptidase, PA domain	SIGNAL PEPTIDE PEPTIDASE	PA domain	GO:0004190|GO:0016020
659	gene-VFH_I382800	Vfaba.Hedin2.R1.1g382800.1	47.0159	2.9714	0.964053	3.0822	0.00205477	0.0648569		-	Protein of unknown function (DUF1442)	DUF1442 FAMILY PROTEIN	-	-
660	gene-VFH_I290640	Vfaba.Hedin2.R1.1g290640.1	444.868	-1.17255	0.38059	-3.08089	0.00206384	0.065044		-	Ribosomal protein L11 methyltransferase (PrmA)	PROTEIN ARGININE N-METHYLTRANSFERASE	S-adenosyl-L-methionine-dependent methyltransferases	GO:0016274|GO:0018216
661	gene-VFH_IV028560	Vfaba.Hedin2.R1.4g028560.1	537.909	1.29788	0.421376	3.0801	0.00206928	0.0650671		-	Enoyl-(Acyl carrier protein) reductase, short chain dehydrogenase	(+)-NEOMENTHOL DEHYDROGENASE	NAD(P)-binding Rossmann-fold domains	GO:0016491|GO:0016616
662	gene-VFH_VI062440	Vfaba.Hedin2.R1.6g062440.1	2570.92	-0.386791	0.125601	-3.07953	0.00207327	0.0650671		-	Threonyl and Alanyl tRNA synthetase second additional domain, DHHA1 domain, tRNA synthetases class II (A)	ALANYL-TRNA SYNTHETASE	Class II aaRS and biotin synthetases, ThrRS/AlaRS common domain, Translation proteins, Putative anticodon-binding domain of alanyl-tRNA synthetase (AlaRS)	GO:0003676|GO:0000166|GO:0004813|GO:0005524|GO:0005737|GO:0006419|GO:0004812
663	gene-VFH_I412320	Vfaba.Hedin2.R1.1g412320.1	6.47706	5.19237	1.68615	3.07943	0.002074	0.0650671		-	-	-	-	-
664	gene-VFH_II161760	Vfaba.Hedin2.R1.2g161760.1	430.12	1.46528	0.476509	3.07502	0.00210487	0.0659355		LG2@102.1, LG2@169.8	Serine carboxypeptidase	SERINE PROTEASE FAMILY S10 SERINE CARBOXYPEPTIDASE	alpha/beta-Hydrolases	GO:0004185|GO:0006508
665	gene-VFH_I085960	Vfaba.Hedin2.R1.1g085960.1	86.1332	-3.27015	1.06506	-3.0704	0.00213771	0.0668632		LG1@168.9	non-haem dioxygenase in morphine synthesis N-terminal, 2OG-Fe(II) oxygenase superfamily	OXOGLUTARATE/IRON-DEPENDENT DIOXYGENASE	Clavaminate synthase-like	-
666	gene-VFH_II236400	Vfaba.Hedin2.R1.2g236400.1	139.289	-1.14414	0.372794	-3.0691	0.00214705	0.067054		-	EF-hand domain pair	-	EF-hand	GO:0005509
667	gene-VFH_U009240	Vfaba.Hedin2.R1.Ung009240.1	80.9537	3.67837	1.19953	3.0665	0.00216583	0.0673953		-	LURP-one-related	-		-
668	gene-VFH_II070880	Vfaba.Hedin2.R1.2g070880.1	47.8437	-3.05693	0.996953	-3.06627	0.00216744	0.0673953		-	-	-	-	-
669	gene-VFH_IV066600	Vfaba.Hedin2.R1.4g066600.1	71.7589	1.98383	0.646992	3.06623	0.00216774	0.0673953		-	Exocyst complex component Sec6	EXOCYST COMPLEX COMPONENT SEC6-RELATED	-	GO:0000145|GO:0006887
670	gene-VFH_VI091440	Vfaba.Hedin2.R1.6g091440.1	288.243	-0.594043	0.193812	-3.06504	0.00217637	0.0675622		-	SHS2 domain found in N terminus of Rpb7p/Rpc25p/MJ0397, S1 RNA binding domain	DNA-DIRECTED RNA POLYMERASE II, III	N-terminal, heterodimerisation domain of RBP7 (RpoE), Nucleic acid-binding proteins	GO:0006351|GO:0006352|GO:0003676
671	gene-VFH_VI177000	Vfaba.Hedin2.R1.6g177000.1	668.576	3.22556	1.05275	3.06394	0.00218439	0.0676672		LG6@169.6	WRKY DNA -binding domain	WRKY TRANSCRIPTION FACTOR 30-RELATED-RELATED	WRKY DNA-binding domain	GO:0003700|GO:0006355|GO:0043565
672	gene-VFH_VI054400	Vfaba.Hedin2.R1.6g054400.1	798.066	-1.31045	0.427737	-3.06368	0.00218629	0.0676672		-	Polysaccharide biosynthesis	OS11G0490100 PROTEIN	-	GO:0045492
673	gene-VFH_I269080	Vfaba.Hedin2.R1.1g269080.2	50.927	2.92473	0.954902	3.06286	0.00219234	0.0676768		-	-	-	-	-
674	gene-VFH_IV238480	Vfaba.Hedin2.R1.4g238480.1	15.9802	-5.59488	1.82675	-3.06275	0.00219314	0.0676768		-	-	-	-	-
675	gene-VFH_I228640	Vfaba.Hedin2.R1.1g228640.1	9.76995	-8.10299	2.64623	-3.06209	0.00219798	0.0676913		-	UDP-glucoronosyl and UDP-glucosyl transferase	GLYCOSYLTRANSFERASE	UDP-Glycosyltransferase/glycogen phosphorylase	GO:0008194
676	gene-VFH_III148840	Vfaba.Hedin2.R1.3g148840.1	240.186	-0.809014	0.264229	-3.06179	0.00220015	0.0676913		LG3@136.5, LG3@144.5	WPP domain, Leucine Rich repeat, Leucine Rich repeat, Leucine Rich repeat, Leucine Rich repeat, Leucine Rich repeat, Leucine Rich repeat, Leucine Rich repeat	RAN GTPASE-ACTIVATING PROTEIN 1	RNI-like	GO:0005515|GO:0005096
677	gene-VFH_II003200	Vfaba.Hedin2.R1.2g003200.1	2457.42	-1.4393	0.470318	-3.06027	0.00221139	0.0679362		-	Plant invertase/pectin methylesterase inhibitor	PECTINESTERASE INHIBITOR-LIKE	Plant invertase/pectin methylesterase inhibitor	GO:0004857
678	gene-VFH_IV136520	Vfaba.Hedin2.R1.4g136520.1	4070.04	-4.85881	1.58873	-3.0583	0.002226	0.0682839		-	K+ potassium transporter, K+ potassium transporter	OSMOTIC STRESS POTASSIUM TRANSPORTER	-	GO:0015079|GO:0016020|GO:0071805
679	gene-VFH_VI078640	Vfaba.Hedin2.R1.6g078640.1	212.296	-0.923576	0.302108	-3.05711	0.00223481	0.0684527		-	Ras family	DRAB11-RELATED	P-loop containing nucleoside triphosphate hydrolases	GO:0005525|GO:0003924
680	gene-VFH_U060760	Vfaba.Hedin2.R1.Ung060760.1	1325.47	-5.77115	1.88901	-3.05512	0.00224968	0.068767		-	0	LYSINE-RICH ARABINOGALACTAN PROTEIN 17-RELATED		GO:0005886
681	gene-VFH_IV195280	Vfaba.Hedin2.R1.4g195280.1	3628.29	-3.51031	1.1491	-3.05482	0.00225193	0.068767		-	Pathogenesis-related protein Bet v 1 family	-	Bet v1-like	GO:0006952|GO:0004864|GO:0009738|GO:0010427|GO:0038023
682	gene-VFH_VI064160	Vfaba.Hedin2.R1.6g064160.1	131.893	-1.30117	0.425997	-3.05441	0.00225504	0.068767		-	Clp protease	ATP-DEPENDENT CLP PROTEASE PROTEOLYTIC SUBUNIT	ClpP/crotonase	GO:0004176|GO:0004252|GO:0006508
683	gene-VFH_II189880	Vfaba.Hedin2.R1.2g189880.1	380.158	1.36421	0.446861	3.05287	0.00226664	0.0690193		-	FAD dependent oxidoreductase	PEROXISOMAL SARCOSINE OXIDASE	FAD-linked reductases, C-terminal domain, FAD/NAD(P)-binding domain	GO:0016491|GO:0050660
684	gene-VFH_V011520	Vfaba.Hedin2.R1.5g011520.1	655.086	-1.17799	0.386097	-3.05103	0.00228056	0.0691142		-	PRA1 family protein	PRENYLATED RAB ACCEPTOR 1-RELATED	-	-
685	gene-VFH_I451120	Vfaba.Hedin2.R1.1g451120.1	9.54062	-7.42011	2.43209	-3.05091	0.00228147	0.0691142		-	Petal formation-expressed	F-BOX PROTEIN WITH A DOMAIN PROTEIN	-	-
686	gene-VFH_II138440	Vfaba.Hedin2.R1.2g138440.1	1053.96	-0.999457	0.327624	-3.05062	0.00228368	0.0691142		LG2@102.1	Tim17/Tim22/Tim23/Pmp24 family, SAM domain (Sterile alpha motif)	MITOCHONDRIAL IMPORT INNER MEMBRANE TRANSLOCASE SUBUNIT TIM22	SAM/Pointed domain	GO:0005515|GO:0042721|GO:0045039
687	gene-VFH_IV023280	Vfaba.Hedin2.R1.4g023280.1	615.21	-2.16325	0.70929	-3.04988	0.00228937	0.0691142		-	Major Facilitator Superfamily	MAJOR FACILITATOR SUPERFAMILY DOMAIN-CONTAINING PROTEIN 10, MAJOR FACILITATOR SUPERFAMILY DOMAIN-CONTAINING PROTEIN 10	MFS general substrate transporter	GO:0022857|GO:0055085
688	gene-VFH_I297280	Vfaba.Hedin2.R1.1g297280.1	115.658	-1.57005	0.514824	-3.04968	0.00229088	0.0691142		-	Amino acid permease	SOLUTE CARRIER FAMILY 12, CATION COTRANSPORTERS	-	GO:0006811|GO:0015377|GO:0016020|GO:0055085
689	gene-VFH_I441240	Vfaba.Hedin2.R1.1g441240.1	1623.35	1.36141	0.446439	3.04949	0.00229233	0.0691142		-	NPR1/NIM1 like defence protein C terminal, Domain of unknown function (DUF3420), BTB/POZ domain, Ankyrin repeat	REGULATORY PROTEIN NPR3	POZ domain, Ankyrin repeat	GO:0005515|GO:0009862|GO:2000022|GO:2000031
690	gene-VFH_III194480	Vfaba.Hedin2.R1.3g194480.1	173.266	-0.995816	0.326566	-3.04936	0.00229332	0.0691142		-	3' exoribonuclease family, domain 1	EXOSOME COMPLEX EXONUCLEASE RIBOSOMAL RNA PROCESSING PROTEIN	Ribonuclease PH domain 2-like, Ribosomal protein S5 domain 2-like	-
691	gene-VFH_II002120	Vfaba.Hedin2.R1.2g002120.1	402.783	-1.89031	0.620041	-3.04868	0.00229846	0.0691142		-	-	GPI-ANCHORED PROTEIN LLG1-RELATED-RELATED	-	-
692	gene-VFH_IV219040	Vfaba.Hedin2.R1.4g219040.1	119.52	-5.72219	1.87705	-3.04851	0.0022998	0.0691142		-	Xyloglucan endo-transglycosylase (XET) C-terminus, Glycosyl hydrolases family 16	XYLOGLUCAN ENDOTRANSGLUCOSYLASE/HYDROLASE PROTEIN 8-RELATED	Concanavalin A-like lectins/glucanases	GO:0005618|GO:0006073|GO:0016762|GO:0048046|GO:0004553|GO:0005975|GO:0010411|GO:0042546
693	gene-VFH_III098560	Vfaba.Hedin2.R1.3g098560.1	394.246	-0.742854	0.243827	-3.04665	0.00231409	0.0694057		LG3@75.2, LG3@115.2, LG3@119.2, LG3@136.5	Vps51/Vps67	UNCHARACTERIZED	-	-
694	gene-VFH_I492800	Vfaba.Hedin2.R1.1g492800.1	466.288	-0.851702	0.279594	-3.04621	0.00231749	0.0694057		-	Phosphomethylpyrimidine kinase, Thiamine monophosphate synthase	PHOSPHOMETHYLPYRIMIDINE KINASE	Ribokinase-like, Thiamin phosphate synthase	GO:0004789|GO:0009228|GO:0008972
695	gene-VFH_IV105400	Vfaba.Hedin2.R1.4g105400.1	1849.02	-4.11614	1.35135	-3.04594	0.00231956	0.0694057		-	Pectinacetylesterase	NOTUM-RELATED	-	GO:0016787
696	gene-VFH_IV019840	Vfaba.Hedin2.R1.4g019840.1	358.086	-6.17906	2.02983	-3.04412	0.00233359	0.0697249		-	Cytochrome P450	CYTOCHROME P450, FAMILY 76, SUBFAMILY C, POLYPEPTIDE 5-RELATED	Cytochrome P450	GO:0005506|GO:0016705|GO:0004497|GO:0020037
697	gene-VFH_I146680	Vfaba.Hedin2.R1.1g146680.4	6.71738	-5.68022	1.86701	-3.04242	0.00234681	0.0700062		LG1@168.9	Pentatricopeptide repeat domain, Pentatricopeptide repeat domain, PPR repeat family, PPR repeat	PENTATRICOPEPTIDE REPEAT-CONTAINING PROTEIN 3, MITOCHONDRIAL	-	GO:0005515
698	gene-VFH_III182800	Vfaba.Hedin2.R1.3g182800.1	106.056	2.77812	0.91324	3.04204	0.00234977	0.0700062		-	RNA dependent RNA polymerase	RNA-DEPENDENT RNA POLYMERASE	RNA-binding domain, RBD	GO:0003723|GO:0003968|GO:0003676
699	gene-VFH_VI027680	Vfaba.Hedin2.R1.6g027680.1	63.9797	5.11994	1.68445	3.03954	0.0023694	0.0704896		-	-	IQ DOMAIN-CONTAINING PROTEIN IQM3	-	-
700	gene-VFH_VI122440	Vfaba.Hedin2.R1.6g122440.1	200.446	-1.0229	0.337005	-3.03526	0.00240326	0.0713944		LG6@110.0, LG6@110.0, qFB6.1	DJ-1/PfpI family, DJ-1/PfpI family	PROTEIN/NUCLEIC ACID DEGLYCASE DJ-1-RELATED	Class I glutamine amidotransferase-like, Class I glutamine amidotransferase-like	-
701	gene-VFH_III163640	Vfaba.Hedin2.R1.3g163640.1	46.9383	3.85379	1.27004	3.03439	0.00241026	0.0714881		-	Protein kinase domain	RUST RESISTANCE KINASE LR10-RELATED	Protein kinase-like (PK-like)	GO:0004672|GO:0006468|GO:0005524
702	gene-VFH_V124400	Vfaba.Hedin2.R1.5g124400.1	97.3032	-1.02442	0.337648	-3.034	0.00241332	0.0714881		-	Vitamin B6 photo-protection and homoeostasis	RUS1 FAMILY PROTEIN C16ORF58	-	-
703	gene-VFH_III227360	Vfaba.Hedin2.R1.3g227360.1	1868.19	1.71112	0.564308	3.03225	0.00242739	0.0718022		-	Arabidopsis broad-spectrum mildew resistance protein RPW8, NB-ARC domain	PLANT BROAD-SPECTRUM MILDEW RESISTANCE PROTEIN RPW8	P-loop containing nucleoside triphosphate hydrolases, L domain-like	GO:0043531|GO:0050832
704	gene-VFH_II210240	Vfaba.Hedin2.R1.2g210240.1	303.353	-0.856961	0.282703	-3.03131	0.00243493	0.0719224		-	AARP2CN (NUC121) domain, 40S ribosome biogenesis protein Tsr1 and BMS1 C-terminal, 40S ribosome biogenesis protein Tsr1 and BMS1 C-terminal	RIBOSOME BIOGENESIS PROTEIN	-	GO:0042254|GO:0005634
705	gene-VFH_IV110560	Vfaba.Hedin2.R1.4g110560.1	67.3673	2.32655	0.767714	3.03049	0.00244156	0.0719997		-	Protein of unknown function (DUF295)	F-BOX PROTEIN SKIP23	F-box domain	GO:0005515
706	gene-VFH_III117400	Vfaba.Hedin2.R1.3g117400.1	123.061	1.0054	0.331801	3.03013	0.0024445	0.0719997		LG3@75.2, LG3@119.2, LG3@136.5	Protein of unknown function, DUF573	BNAANNG10740D PROTEIN-RELATED	-	GO:0006355
707	gene-VFH_U065000	Vfaba.Hedin2.R1.Ung065000.1	212.848	4.62748	1.52808	3.02829	0.0024594	0.0723358		-	Xylanase inhibitor C-terminal, Xylanase inhibitor N-terminal	ASPARTYL PROTEASES		GO:0004190|GO:0006508
708	gene-VFH_I491400	Vfaba.Hedin2.R1.1g491400.1	12.6208	-5.59719	1.849	-3.02714	0.00246876	0.072508		-	Ulp1 protease family, C-terminal catalytic domain	SENTRIN-SPECIFIC PROTEASE 8	Cysteine proteinases	GO:0019784|GO:0006508|GO:0008234
709	gene-VFH_V113560	Vfaba.Hedin2.R1.5g113560.1	10390.2	-3.22906	1.06691	-3.02655	0.00247361	0.0725477		-	Domain of unknown function (DUF3474), Fatty acid desaturase	OMEGA-6 FATTY ACID DESATURASE, CHLOROPLASTIC	-	GO:0016717|GO:0006629
710	gene-VFH_VI083600	Vfaba.Hedin2.R1.6g083600.1	239.29	-4.73029	1.56325	-3.02593	0.00247871	0.0725943		-	Uncharacterized protein family, UPF0114	OS06G0710300 PROTEIN	-	-
711	gene-VFH_IV228400	Vfaba.Hedin2.R1.4g228400.1	1330.86	2.29431	0.758637	3.02426	0.00249244	0.0728934		-	Lipocalin-like domain	APOLIPOPROTEIN D	Lipocalins	-
712	gene-VFH_I285760	Vfaba.Hedin2.R1.1g285760.1	248.826	-6.24606	2.06617	-3.02302	0.00250266	0.073089		-	Fasciclin domain	FASCICLIN-LIKE ARABINOGALACTAN PROTEIN	FAS1 domain	-
713	gene-VFH_II059080	Vfaba.Hedin2.R1.2g059080.1	1501.78	1.65009	0.545931	3.02253	0.00250667	0.073103		LG2@84.5	D-mannose binding lectin, S-locus glycoprotein domain, Protein kinase domain	OS07G0415500 PROTEIN	Protein kinase-like (PK-like), alpha-D-mannose-specific plant lectins	GO:0005524|GO:0048544|GO:0004672|GO:0006468|GO:0004674
714	gene-VFH_I046160	Vfaba.Hedin2.R1.1g046160.1	300.738	-1.9135	0.633608	-3.02001	0.00252769	0.0736122		LG1@168.9	Glutaredoxin	GLUTAREDOXIN	Thioredoxin-like	-
715	gene-VFH_VI149720	Vfaba.Hedin2.R1.6g149720.1	199.019	-1.00916	0.334212	-3.01951	0.00253183	0.0736294		LG6@121.0, LG6@169.6	Zinc finger, C3HC4 type (RING finger)	E3 UBIQUITIN PROTEIN LIGASE DRIP1	RING/U-box	GO:0004842|GO:0046872
716	gene-VFH_IV069840	Vfaba.Hedin2.R1.4g069840.1	20.1169	-3.91047	1.29548	-3.01856	0.00253982	0.0736986		-	-	AMINO ACID-LIGASE	-	-
717	gene-VFH_I020520	Vfaba.Hedin2.R1.1g020520.1	50.3274	-4.66036	1.54401	-3.01835	0.00254156	0.0736986		-	Plant organelle RNA recognition domain	PROTEIN WHAT'S THIS FACTOR 1 HOMOLOG, CHLOROPLASTIC	-	GO:0003723
718	gene-VFH_I002880	Vfaba.Hedin2.R1.1g002880.1	8488.42	-1.43866	0.4767	-3.01795	0.00254489	0.0736986		-	Transaldolase/Fructose-6-phosphate aldolase	TRANSALDOLASE	Aldolase	GO:0004801|GO:0005737|GO:0006098|GO:0005975
719	gene-VFH_III073400	Vfaba.Hedin2.R1.3g073400.1	253.953	1.6141	0.534971	3.01717	0.00255144	0.0737851		LG3@75.2, LG3@119.2	Domain of unknown function (DUF3475), Protein of unknown function (DUF668)	BNAC09G50660D PROTEIN	-	GO:0045927
720	gene-VFH_II227720	Vfaba.Hedin2.R1.2g227720.1	242.222	3.64898	1.20995	3.01583	0.00256281	0.0740105		-	-	-	-	-
721	gene-VFH_I414520	Vfaba.Hedin2.R1.1g414520.1	3399.84	-1.06869	0.3545	-3.01465	0.00257279	0.0741048		-	Ribosomal L30 N-terminal domain, Ribosomal protein L30p/L7e	60S RIBOSOMAL PROTEIN L7	Ribosomal protein L30p/L7e	GO:0000463|GO:0003735|GO:0022625
722	gene-VFH_II039760	Vfaba.Hedin2.R1.2g039760.1	1601.52	-1.15028	0.38157	-3.01459	0.00257323	0.0741048		LG2@10.7	Citrate synthase, C-terminal domain	CITRATE SYNTHASE	Citrate synthase	GO:0006099|GO:0046912
723	gene-VFH_U109240	Vfaba.Hedin2.R1.Ung109240.1	2955.23	2.33118	0.773585	3.01348	0.00258268	0.0741728		-	NADP oxidoreductase coenzyme F420-dependent, NADP oxidoreductase coenzyme F420-dependent	AROGENATE DEHYDROGENASE-RELATED		GO:0004665|GO:0006571|GO:0008977|GO:0033730
724	gene-VFH_IV081880	Vfaba.Hedin2.R1.4g081880.1	142.011	-0.878612	0.291561	-3.01347	0.00258276	0.0741728		-	Conserved hypothetical ATP binding protein	XPA-BINDING PROTEIN 1-RELATED	P-loop containing nucleoside triphosphate hydrolases	-
725	gene-VFH_U053040	Vfaba.Hedin2.R1.Ung053040.1	55.9171	-4.08267	1.35677	-3.00911	0.00262014	0.0751422		-	Elongation factor Tu GTP binding domain	TRANSLATION FACTOR		GO:0003924|GO:0005525
726	gene-VFH_III048680	Vfaba.Hedin2.R1.3g048680.1	917.118	-1.04931	0.348921	-3.0073	0.00263584	0.0754877		-	Isocitrate/isopropylmalate dehydrogenase	DECARBOXYLATING DEHYDROGENASES-ISOCITRATE, ISOPROPYLMALATE, TARTRATE	Isocitrate/Isopropylmalate dehydrogenase-like	GO:0006099|GO:0000287|GO:0016616|GO:0051287
727	gene-VFH_V009800	Vfaba.Hedin2.R1.5g009800.1	35.0079	7.01126	2.33192	3.00664	0.00264149	0.075545		-	Hpt domain	PHOSPHORELAY INTERMEDIATE PROTEIN YPD1	Histidine-containing phosphotransfer domain, HPT domain	GO:0000160|GO:0009927|GO:0043424
728	gene-VFH_III038040	Vfaba.Hedin2.R1.3g038040.1	42.1633	2.28449	0.75994	3.00614	0.00264583	0.0755649		LG3@24.7, LG3@28.4	Late embryogenesis abundant protein	LATE EMBRYOGENESIS ABUNDANT (LEA) HYDROXYPROLINE-RICH GLYCOPROTEIN FAMILY	-	-
729	gene-VFH_U007160	Vfaba.Hedin2.R1.Ung007160.1	613.187	-1.44196	0.479867	-3.00491	0.00265658	0.0757187		-	Enolase, C-terminal TIM barrel domain, Enolase, N-terminal domain	ENOLASE		GO:0000015|GO:0000287|GO:0004634|GO:0006096
730	gene-VFH_IV209800	Vfaba.Hedin2.R1.4g209800.1	1493.57	1.63033	0.542609	3.00461	0.00265923	0.0757187		-	Glyoxalase/Bleomycin resistance protein/Dioxygenase superfamily	GLYOXALASE FAMILY PROTEIN	Glyoxalase/Bleomycin resistance protein/Dihydroxybiphenyl dioxygenase	-
731	gene-VFH_II086920	Vfaba.Hedin2.R1.2g086920.1	18.2353	-8.78109	2.92305	-3.00409	0.00266379	0.0757187		LG2@102.1	PPR repeat family, PPR repeat family, PPR repeat	PENTATRICOPEPTIDE REPEAT-CONTAINING PROTEIN PET309, MITOCHONDRIAL	-	GO:0005515
732	gene-VFH_III147120	Vfaba.Hedin2.R1.3g147120.1	21.4582	-5.60793	1.86691	-3.00385	0.00266584	0.0757187		-	-	-	-	-
733	gene-VFH_IV099440	Vfaba.Hedin2.R1.4g099440.1	1236.17	1.11466	0.371166	3.00313	0.00267217	0.0757946		-	Adenosylmethionine decarboxylase	S-ADENOSYLMETHIONINE DECARBOXYLASE	S-adenosylmethionine decarboxylase	GO:0004014|GO:0008295|GO:0006597
734	gene-VFH_II255840	Vfaba.Hedin2.R1.2g255840.1	97.4014	-2.20647	0.735221	-3.0011	0.00269008	0.0761982		-	Reticulon	RETICULON	-	-
735	gene-VFH_VI047760	Vfaba.Hedin2.R1.6g047760.1	262.497	-0.787998	0.262705	-2.99956	0.00270372	0.0764799		-	CDP-alcohol phosphatidyltransferase	PHOSPHATIDYLINOSITOL SYNTHASE	-	GO:0008654|GO:0016020|GO:0016780
736	gene-VFH_IV116800	Vfaba.Hedin2.R1.4g116800.2	254.949	2.92249	0.974482	2.99902	0.00270853	0.0765112		-	Cytochrome P450	CYTOCHROME P450 26	Cytochrome P450	GO:0005506|GO:0016705|GO:0004497|GO:0020037
737	gene-VFH_U048760	Vfaba.Hedin2.R1.Ung048760.1	212.643	0.922148	0.307614	2.99775	0.00271984	0.076726		-	0			-
738	gene-VFH_I089440	Vfaba.Hedin2.R1.1g089440.1	2641.89	-1.06582	0.355693	-2.99646	0.00273135	0.076946		LG1@168.9	CoA binding domain, CoA-ligase	SUCCINYL-COA LIGASE SUBUNIT ALPHA	Succinyl-CoA synthetase domains, NAD(P)-binding Rossmann-fold domains	GO:0003824
739	gene-VFH_I323040	Vfaba.Hedin2.R1.1g323040.1	28.6142	-6.21693	2.07513	-2.99593	0.00273611	0.0769754		-	Ribosomal L18 of archaea, bacteria, mitoch. and chloroplast	39S RIBOSOMAL PROTEIN L18, MITOCHONDRIAL	Translational machinery components	GO:0003735|GO:0005840|GO:0006412
740	gene-VFH_I046600	Vfaba.Hedin2.R1.1g046600.1	1287.08	2.08004	0.694575	2.9947	0.00274719	0.0771822		LG1@168.9	Myb-like DNA-binding domain	TRANSCRIPTION ACTIVATOR GLK1	Homeodomain-like	GO:0003700|GO:0045893|GO:0003677
741	gene-VFH_VI104680	Vfaba.Hedin2.R1.6g104680.1	10.6403	6.59691	2.20348	2.99385	0.00275477	0.0772029		-	haloacid dehalogenase-like hydrolase, Cation transporter/ATPase, N-terminus, E1-E2 ATPase	CALCIUM-TRANSPORTING ATPASE	Calcium ATPase, transmembrane domain M, Calcium ATPase, transduction domain A, HAD-like	GO:0000166|GO:0005215|GO:0005524|GO:0016020|GO:0016887
742	gene-VFH_III059360	Vfaba.Hedin2.R1.3g059360.1	453.56	2.39266	0.799208	2.99379	0.00275538	0.0772029		-	AP2 domain	DNA-BINDING DOMAIN	DNA-binding domain	GO:0003677|GO:0003700|GO:0009873|GO:0006355
743	gene-VFH_VI186160	Vfaba.Hedin2.R1.6g186160.1	64.8116	2.34297	0.782837	2.99292	0.00276321	0.0773177		-	Senescence domain	SPARTIN	-	-
744	gene-VFH_I123880	Vfaba.Hedin2.R1.1g123880.1	237.288	-0.918282	0.307009	-2.99106	0.0027801	0.0775362		LG1@168.9	Elongation factor Tu domain 2, Elongation factor G C-terminus, Elongation factor Tu GTP binding domain	ELONGATION FACTOR G, MITOCHONDRIAL	EF-G C-terminal domain-like, P-loop containing nucleoside triphosphate hydrolases, Translation proteins	GO:0005525|GO:0003924
745	gene-VFH_II042640	Vfaba.Hedin2.R1.2g042640.1	240.065	-0.956174	0.319697	-2.99088	0.00278179	0.0775362		LG2@10.7	ATP synthase	ATP SYNTHASE GAMMA CHAIN	ATP synthase (F1-ATPase), gamma subunit	GO:0015986|GO:0045261|GO:0046933
746	gene-VFH_II062040	Vfaba.Hedin2.R1.2g062040.1	791.558	-0.697707	0.233283	-2.99082	0.00278225	0.0775362		LG2@68.4, LG2@84.5	Middle or third domain of peptidase_M16, Peptidase M16 inactive domain, Peptidase M16 inactive domain, Insulinase (Peptidase family M16)	NARDILYSIN	LuxS/MPP-like metallohydrolase, LuxS/MPP-like metallohydrolase, LuxS/MPP-like metallohydrolase, LuxS/MPP-like metallohydrolase	GO:0046872
747	gene-VFH_III048960	Vfaba.Hedin2.R1.3g048960.1	618.357	-1.0584	0.35401	-2.98975	0.00279208	0.0776951		-	Cys/Met metabolism PLP-dependent enzyme	TRANS-SULFURATION ENZYME FAMILY MEMBER	PLP-dependent transferases	GO:0004121|GO:0071266|GO:0019346|GO:0030170|GO:0003824
748	gene-VFH_V069880	Vfaba.Hedin2.R1.5g069880.2	870.762	2.77732	0.929063	2.98938	0.00279546	0.0776951		LG5@79.6, LG5@86.9, LG5@93.9	Protein kinase domain	MITOGEN-ACTIVATED PROTEIN KINASE	Protein kinase-like (PK-like)	GO:0004672|GO:0006468|GO:0005524|GO:0004707
749	gene-VFH_U089280	Vfaba.Hedin2.R1.Ung089280.1	19.5458	-5.48563	1.83537	-2.98885	0.00280031	0.0777256		-	0			-
750	gene-VFH_I282920	Vfaba.Hedin2.R1.1g282920.1	10915.4	4.21061	1.4096	2.98709	0.00281645	0.0780689		-	Fructose-bisphosphate aldolase class-I	FRUCTOSE-BISPHOSPHATE ALDOLASE	Aldolase	GO:0004332|GO:0006096
751	gene-VFH_VI061640	Vfaba.Hedin2.R1.6g061640.1	368.682	3.88176	1.2999	2.9862	0.00282468	0.0781923		-	Lipase (class 3)	PHOSPHOLIPASE A1-IBETA2, CHLOROPLASTIC	alpha/beta-Hydrolases, Formin homology 2 domain (FH2 domain)	GO:0006629
752	gene-VFH_IV191120	Vfaba.Hedin2.R1.4g191120.1	93.7832	-1.01041	0.338425	-2.98564	0.00282989	0.0782319		-	mTERF, mTERF	CGI-12 PROTEIN-RELATED	-	GO:0003690|GO:0006355
753	gene-VFH_II208040	Vfaba.Hedin2.R1.2g208040.1	89.456	-1.4569	0.488301	-2.98361	0.00284873	0.0786477		-	Glycine cleavage H-protein	UNCHARACTERIZED	Single hybrid motif	-
754	gene-VFH_I276560	Vfaba.Hedin2.R1.1g276560.1	207.208	-1.11678	0.374392	-2.98291	0.00285526	0.078723		-	Calcineurin-like phosphoesterase	-	Metallo-dependent phosphatases	GO:0016787
755	gene-VFH_VI019040	Vfaba.Hedin2.R1.6g019040.1	381.783	-0.961122	0.322288	-2.98219	0.00286197	0.0788032		-	Phosphotyrosyl phosphate activator (PTPA) protein	SERINE/THREONINE-PROTEIN PHOSPHATASE 2A REGULATORY SUBUNIT B	PTPA-like	GO:0019211
756	gene-VFH_V072240	Vfaba.Hedin2.R1.5g072240.1	2419.48	1.13604	0.381128	2.98075	0.00287546	0.0790695		LG5@79.6, LG5@86.9, LG5@93.9	Zinc finger C-x8-C-x5-C-x3-H type (and similar), Zinc finger C-x8-C-x5-C-x3-H type (and similar), Zinc finger C-x8-C-x5-C-x3-H type (and similar), Zinc finger C-x8-C-x5-C-x3-H type (and similar)	PROTEIN PHOSPHATASE RELATED	CCCH zinc finger, CCCH zinc finger, CCCH zinc finger	GO:0046872
757	gene-VFH_IV214720	Vfaba.Hedin2.R1.4g214720.1	12.6729	5.5334	1.85696	2.97982	0.00288422	0.0792052		-	-	TRANSCRIPTION FACTOR, PUTATIVE (DUF863)-RELATED	-	-
758	gene-VFH_V135320	Vfaba.Hedin2.R1.5g135320.1	424.093	-2.33148	0.782881	-2.97808	0.00290059	0.0794418		-	E motif, E+ motif, DYW family of nucleic acid deaminases, PPR repeat family, PPR repeat family, PPR repeat, PPR repeat, PPR repeat, PPR repeat	PENTATRICOPEPTIDE REPEAT-CONTAINING PROTEIN	-	GO:0008270|GO:0005515
759	gene-VFH_II267800	Vfaba.Hedin2.R1.2g267800.1	34.3923	-6.40655	2.1513	-2.97799	0.00290148	0.0794418		-	VQ motif	VQ MOTIF-CONTAINING PROTEIN 11-LIKE	-	-
760	gene-VFH_U013720	Vfaba.Hedin2.R1.Ung013720.1	81.576	-1.07211	0.360088	-2.97736	0.00290741	0.0794418		-	4'-phosphopantetheinyl transferase superfamily	PHOSPHOPANTETHEINE TRANSFERASE		GO:0000287|GO:0008897
761	gene-VFH_I440960	Vfaba.Hedin2.R1.1g440960.1	1841.2	-0.591707	0.198741	-2.97728	0.00290818	0.0794418		-	Sey1 three-helix bundle domain, Root hair defective 3 GTP-binding protein (RHD3) GTPase domain	PROTEIN SEY1	P-loop containing nucleoside triphosphate hydrolases	GO:0005525
762	gene-VFH_I346280	Vfaba.Hedin2.R1.1g346280.1	831.896	-0.740773	0.248854	-2.97673	0.00291338	0.0794789		-	Conserved oligomeric complex COG6	COMPONENT OF OLIGOMERIC GOLGI COMPLEX 6	-	GO:0006891|GO:0017119
763	gene-VFH_I418880	Vfaba.Hedin2.R1.1g418880.1	474.68	2.09636	0.704466	2.97581	0.00292217	0.0796137		-	Protein kinase domain	OS07G0415500 PROTEIN	Protein kinase-like (PK-like)	GO:0004672|GO:0006468|GO:0005524
764	gene-VFH_VI053760	Vfaba.Hedin2.R1.6g053760.1	151.561	-2.14177	0.720035	-2.97454	0.00293429	0.0798389		-	Thymidylate synthase, Dihydrofolate reductase	THYMIDYLATE SYNTHASE 1	Thymidylate synthase/dCMP hydroxymethylase, Dihydrofolate reductase-like	GO:0016741|GO:0004146|GO:0046654|GO:0004799|GO:0006231
765	gene-VFH_II077160	Vfaba.Hedin2.R1.2g077160.1	757.457	1.60013	0.538327	2.97241	0.00295472	0.0802189		LG2@84.5, LG2@102.1	Protein kinase domain	SERINE/THREONINE-PROTEIN KINASE-LIKE PROTEIN CCR4	Protein kinase-like (PK-like), RCC1/BLIP-II	GO:0004674|GO:0004672|GO:0006468|GO:0005524
766	gene-VFH_I426160	Vfaba.Hedin2.R1.1g426160.1	17.8636	6.36664	2.14201	2.97228	0.002956	0.0802189		-	Sugar efflux transporter for intercellular exchange, Sugar efflux transporter for intercellular exchange	RAG1-ACTIVATING PROTEIN 1	-	GO:0016020
767	gene-VFH_IV063160	Vfaba.Hedin2.R1.4g063160.1	1336.25	-0.552568	0.185954	-2.97153	0.00296317	0.0803081		-	Helicase conserved C-terminal domain, DEAD/DEAH box helicase	ATP-DEPENDENT RNA HELICASE DBP3	P-loop containing nucleoside triphosphate hydrolases	GO:0003724|GO:0003676|GO:0005524
768	gene-VFH_II053000	Vfaba.Hedin2.R1.2g053000.1	124.98	0.963269	0.324323	2.97009	0.0029771	0.080525		LG2@84.5	RNA recognition motif. (a.k.a. RRM, RBD, or RNP domain)	TRANSFORMER-2 SEX-DETERMINING PROTEIN-RELATED	RNA-binding domain, RBD	GO:0003676|GO:0003723
769	gene-VFH_U091200	Vfaba.Hedin2.R1.Ung091200.1	53.6463	3.39428	1.14289	2.9699	0.00297895	0.080525		-	0	T23E23.1		-
770	gene-VFH_V023800	Vfaba.Hedin2.R1.5g023800.1	19.0646	-9.72536	3.27511	-2.96947	0.00298311	0.0805322		-	ATP synthase alpha/beta family, beta-barrel domain, ATP synthase alpha/beta chain, C terminal domain, ATP synthase alpha/beta family, nucleotide-binding domain	ATP SYNTHASE SUBUNIT ALPHA, MITOCHONDRIAL	P-loop containing nucleoside triphosphate hydrolases, N-terminal domain of alpha and beta subunits of F1 ATP synthase, C-terminal domain of alpha and beta subunits of F1 ATP synthase	GO:0032559|GO:0046034|GO:1902600|GO:0005524|GO:0015986|GO:0045261|GO:0046933
771	gene-VFH_II117360	Vfaba.Hedin2.R1.2g117360.1	517.493	-1.0213	0.344122	-2.96784	0.00299896	0.0807749		LG2@102.1	Glutamine amidotransferase domain, Asparagine synthase	ASPARAGINE SYNTHETASE	N-terminal nucleophile aminohydrolases (Ntn hydrolases), Adenine nucleotide alpha hydrolases-like	GO:0004066|GO:0006529
772	gene-VFH_U008960	Vfaba.Hedin2.R1.Ung008960.1	537.373	1.50174	0.50602	2.96775	0.0029999	0.0807749		-	Protein phosphatase 2C, Protein phosphatase 2C	PROTEIN PHOSPHATASE 2C		GO:0004722|GO:0006470|GO:0043169
773	gene-VFH_U043640	Vfaba.Hedin2.R1.Ung043640.1	414.531	1.19486	0.40268	2.96726	0.00300465	0.0807977		-	S-locus glycoprotein domain, D-mannose binding lectin, PAN-like domain, Protein kinase domain	OS07G0415500 PROTEIN		GO:0048544|GO:0004672|GO:0006468|GO:0005524|GO:0004674
774	gene-VFH_I008400	Vfaba.Hedin2.R1.1g008400.1	8.50969	-5.57628	1.88142	-2.96386	0.00303808	0.0815512		-	-	ADAPTER PROTEIN, PUTATIVE-RELATED	Winged helix DNA-binding domain	-
775	gene-VFH_U031560	Vfaba.Hedin2.R1.Ung031560.1	646.06	-1.10329	0.372278	-2.96361	0.00304054	0.0815512		-	0	CYTOCHROME C OXIDASE POLYPEPTIDE VIA		GO:0005743|GO:0005751
776	gene-VFH_III019640	Vfaba.Hedin2.R1.3g019640.1	934.193	-0.594198	0.200606	-2.96202	0.00305628	0.0817813		LG3@24.7, LG3@27.7, LG3@28.4	Ubiquitin-specific protease C-terminal, ICP0-binding domain of Ubiquitin-specific protease 7, MATH domain, Ubiquitin carboxyl-terminal hydrolase	UBIQUITIN CARBOXYL-TERMINAL HYDROLASE	Cysteine proteinases, TRAF domain-like	GO:0004843|GO:0006511|GO:0016579|GO:0005515
777	gene-VFH_V043560	Vfaba.Hedin2.R1.5g043560.1	18.6806	-15.1061	5.1003	-2.9618	0.00305851	0.0817813		-	Multicopper oxidase, Multicopper oxidase, Multicopper oxidase	MULTI-COPPER OXIDASE	Cupredoxins, Cupredoxins, Cupredoxins	GO:0005507|GO:0016491|GO:0046274|GO:0048046|GO:0052716
778	gene-VFH_VI021160	Vfaba.Hedin2.R1.6g021160.1	504.191	2.25694	0.762082	2.96155	0.00306097	0.0817813		-	Prephenate dehydratase	PREPHENATE DEHYDRATASE P PROTEIN	ACT-like, Periplasmic binding protein-like II	GO:0004664|GO:0009094
779	gene-VFH_III077120	Vfaba.Hedin2.R1.3g077120.1	96.6286	-1.71563	0.579672	-2.95966	0.00307977	0.0821774		LG3@75.2, LG3@119.2	Phloem protein 2	F-BOX DOMAIN-CONTAINING PROTEIN	F-box domain	GO:0005515
780	gene-VFH_III007960	Vfaba.Hedin2.R1.3g007960.1	431.07	-0.76115	0.257232	-2.959	0.00308638	0.0822479		-	EF-hand domain pair, EF-hand domain pair, EF hand	RETICULOCALBIN	EF-hand, EF-hand	GO:0005509
781	gene-VFH_I291600	Vfaba.Hedin2.R1.1g291600.1	397.045	-1.43561	0.485235	-2.95858	0.00309059	0.0822542		-	Protein of unknown function (DUF1005)	OS08G0163500 PROTEIN	-	-
782	gene-VFH_III087080	Vfaba.Hedin2.R1.3g087080.1	278.901	-1.08867	0.368083	-2.95769	0.00309952	0.0823861		LG3@75.2, LG3@119.2	DIRP, Myb-like DNA-binding domain	LIN-9	Homeodomain-like	GO:0006351|GO:0017053
783	gene-VFH_V127400	Vfaba.Hedin2.R1.5g127400.1	2.09058	6.51064	2.20176	2.95702	0.00310631	NA		-	PPR repeat	OS07G0599000 PROTEIN	-	GO:0005515
784	gene-VFH_U093360	Vfaba.Hedin2.R1.Ung093360.1	8.13518	-5.8304	1.97354	-2.95428	0.00313396	0.0831945		-	0			-
785	gene-VFH_I429680	Vfaba.Hedin2.R1.1g429680.1	266.352	0.976654	0.330726	2.95306	0.00314636	0.0832189		-	Stress-induced protein Di19, C-terminal, Drought induced 19 protein (Di19), zinc-binding	PROTEIN DEHYDRATION-INDUCED 19	-	-
786	gene-VFH_VI083400	Vfaba.Hedin2.R1.6g083400.1	270.361	-4.29083	1.45326	-2.95256	0.00315153	0.0832189		-	-	OS08G0107100 PROTEIN-RELATED	-	-
787	gene-VFH_I201040	Vfaba.Hedin2.R1.1g201040.1	243.931	1.10787	0.375238	2.95246	0.00315251	0.0832189		-	HSP20-like domain found in ArsA, Anion-transporting ATPase	OS02G0711200 PROTEIN	P-loop containing nucleoside triphosphate hydrolases	-
788	gene-VFH_I482000	Vfaba.Hedin2.R1.1g482000.1	355.162	2.15325	0.729401	2.95207	0.00315648	0.0832189		-	Leucine rich repeat, Leucine rich repeat N-terminal domain, Leucine Rich Repeat, Leucine Rich Repeat, Protein kinase domain	LRR RECEPTOR-LIKE SERINE/THREONINE-PROTEIN KINASE-RELATED	Protein kinase-like (PK-like), L domain-like, L domain-like	GO:0005524|GO:0005515|GO:0004672|GO:0006468
789	gene-VFH_VI065760	Vfaba.Hedin2.R1.6g065760.1	1158.82	-0.828736	0.280748	-2.95188	0.00315841	0.0832189		-	Domain of unknown function (DUF5915), Anticodon-binding domain of tRNA ligase, tRNA synthetases class I (I, L, M and V), tRNA synthetases class I (I, L, M and V)	SOLEUCYL-TRNA SYNTHETASE	Nucleotidylyl transferase, ValRS/IleRS/LeuRS editing domain, Anticodon-binding domain of a subclass of class I aminoacyl-tRNA synthetases	GO:0004812|GO:0006418|GO:0002161|GO:0000166|GO:0004822|GO:0005524|GO:0006428|GO:0000049
790	gene-VFH_III153280	Vfaba.Hedin2.R1.3g153280.1	237.111	-1.09672	0.371581	-2.9515	0.00316236	0.0832189		LG3@136.5, LG3@144.5	-	BNAC09G30780D PROTEIN	RNI-like, WD40 repeat-like	GO:0071493|GO:0080008|GO:0005515
791	gene-VFH_III109680	Vfaba.Hedin2.R1.3g109680.1	356.665	-1.91995	0.650513	-2.95144	0.00316301	0.0832189		LG3@75.2, LG3@115.2, LG3@119.2, LG3@136.5	-	NUCLEAR TRANSPORT FACTOR 2 (NTF2) FAMILY PROTEIN	NTF2-like	-
792	gene-VFH_IV095400	Vfaba.Hedin2.R1.4g095400.1	788.441	5.0431	1.70977	2.94958	0.00318211	0.0836152		-	bHLH-MYC and R2R3-MYB transcription factors N-terminal, Helix-loop-helix DNA-binding domain	MYC	HLH, helix-loop-helix DNA-binding domain	GO:0003700|GO:0006355|GO:0046983
793	gene-VFH_U102640	Vfaba.Hedin2.R1.Ung102640.1	43.4122	1.62348	0.550575	2.94871	0.00319106	0.0837299		-	Early Flowering 4 domain	PROTEIN ELF4-LIKE 4		GO:0042753
794	gene-VFH_I335000	Vfaba.Hedin2.R1.1g335000.1	709.401	1.35541	0.459811	2.94775	0.00320098	0.0837299		-	Polyketide cyclase / dehydrase and lipid transport	-	Bet v1-like	-
795	gene-VFH_III208800	Vfaba.Hedin2.R1.3g208800.1	1222.71	0.647968	0.21982	2.94772	0.00320127	0.0837299		-	B-box zinc finger, B-box zinc finger	ZINC FINGER PROTEIN CONSTANS-LIKE 4	-	GO:0009909|GO:0008270
796	gene-VFH_U073400	Vfaba.Hedin2.R1.Ung073400.1	251.088	3.95985	1.34342	2.94759	0.00320265	0.0837299		-	Cytochrome P450	CYTOCHROME P450 71B11-RELATED		GO:0005506|GO:0016705|GO:0004497|GO:0020037
797	gene-VFH_V165280	Vfaba.Hedin2.R1.5g165280.1	23.8619	-5.24236	1.77923	-2.94642	0.0032148	0.0839414		-	Lipase (class 3)	PHOSPHOLIPASE A1 PLIP2, CHLOROPLASTIC	alpha/beta-Hydrolases	GO:0006629|GO:0008970
798	gene-VFH_I326440	Vfaba.Hedin2.R1.1g326440.1	186.673	0.812407	0.275965	2.94388	0.00324128	0.0845264		-	Amino acid kinase family	GLUTAMATE 5-KINASE	Carbamate kinase-like	GO:0016301
799	gene-VFH_IV121360	Vfaba.Hedin2.R1.4g121360.1	464.686	1.15629	0.392915	2.94285	0.00325208	0.0847012		-	Protein kinase domain	LEAF RUST 10 DISEASE-RESISTANCE LOCUS RECEPTOR-LIKE PROTEIN KINASE-LIKE 1.4	Protein kinase-like (PK-like)	GO:0004672|GO:0005524|GO:0006468
800	gene-VFH_I393320	Vfaba.Hedin2.R1.1g393320.1	375.579	-2.03137	0.690738	-2.94087	0.00327294	0.0849375		-	-	EXPRESSED PROTEIN	Nucleotide-diphospho-sugar transferases	-
801	gene-VFH_IV157360	Vfaba.Hedin2.R1.4g157360.2	415.964	1.45309	0.494109	2.94082	0.0032734	0.0849375		-	Histidine phosphatase superfamily (branch 1)	PHOSPHOGLYCERATE MUTASE FAMILY PROTEIN	Phosphoglycerate mutase-like	-
802	gene-VFH_II197200	Vfaba.Hedin2.R1.2g197200.1	40.9395	-3.21054	1.09183	-2.9405	0.00327683	0.0849375		-	RING-like zinc finger, von Willebrand factor type A domain	CALCIUM-ACTIVATED CHLORIDE CHANNEL REGULATOR	RING/U-box, vWA-like	-
803	gene-VFH_III142480	Vfaba.Hedin2.R1.3g142480.1	266.062	3.08842	1.05033	2.94043	0.00327756	0.0849375		LG3@136.5, LG3@144.5	Ring finger domain	RING FINGER AND PROTEASE ASSOCIATED DOMAIN-CONTAINING	RING/U-box	-
804	gene-VFH_I432400	Vfaba.Hedin2.R1.1g432400.1	2854.06	-1.78381	0.607123	-2.93814	0.00330187	0.0854607		-	CoA-ligase, Citrate synthase, C-terminal domain	ATP-CITRATE SYNTHASE	NAD(P)-binding Rossmann-fold domains, Citrate synthase	GO:0003824|GO:0006099|GO:0046912
805	gene-VFH_III059000	Vfaba.Hedin2.R1.3g059000.1	1138.59	2.01782	0.687035	2.937	0.00331401	0.0856677		-	CRAL/TRIO, N-terminal domain, CRAL/TRIO domain	PATELLIN-1	CRAL/TRIO domain, CRAL/TRIO N-terminal domain	GO:0008289
806	gene-VFH_III012640	Vfaba.Hedin2.R1.3g012640.1	1386.71	-1.92622	0.655961	-2.93649	0.00331954	0.0857038		-	3-Oxoacyl-[acyl-carrier-protein (ACP)] synthase III C terminal, FAE1/Type III polyketide synthase-like protein	3-KETOACYL-COA SYNTHASE	Thiolase-like, Thiolase-like	GO:0006633|GO:0016020|GO:0016747|GO:0016746
807	gene-VFH_I354040	Vfaba.Hedin2.R1.1g354040.1	461.826	-0.650198	0.22147	-2.93584	0.0033265	0.0857765		-	von Willebrand factor type A domain, Ubiquitin interaction motif, Ubiquitin interaction motif, Ubiquitin interaction motif	26S PROTEASOME NON-ATPASE REGULATORY SUBUNIT 4	vWA-like	-
808	gene-VFH_I050600	Vfaba.Hedin2.R1.1g050600.1	364.581	2.93733	1.0008	2.93497	0.00333578	0.085836		LG1@168.9	Formiminotransferase domain, N-terminal subdomain	FORMIMINOTRANSFERASE-CYCLODEAMINASE	Formiminotransferase domain of formiminotransferase-cyclodeaminase., Formiminotransferase domain of formiminotransferase-cyclodeaminase.	GO:0005542|GO:0016740
809	gene-VFH_U108560	Vfaba.Hedin2.R1.Ung108560.1	2670.49	-1.02815	0.350323	-2.93485	0.0033371	0.085836		-	3, 4-dihydroxy-2-butanone 4-phosphate synthase, GTP cyclohydrolase II	GTP CYCLOHYDROLASE II-RELATED		GO:0009231|GO:0008686|GO:0003935
810	gene-VFH_III014400	Vfaba.Hedin2.R1.3g014400.1	201.267	1.52768	0.52081	2.93327	0.0033541	0.0861664		-	Serine-threonine protein phosphatase N-terminal domain, Calcineurin-like phosphoesterase	SERINE/THREONINE PROTEIN PHOSPHATASE	Metallo-dependent phosphatases	GO:0016787
811	gene-VFH_VI092960	Vfaba.Hedin2.R1.6g092960.1	3031.75	1.17293	0.399989	2.93241	0.00336344	0.0862992		-	Stress up-regulated Nod 19	STRESS UP-REGULATED NOD 19 PROTEIN	-	-
812	gene-VFH_I007760	Vfaba.Hedin2.R1.1g007760.1	790.207	1.78054	0.607634	2.93029	0.00338643	0.0867182		-	Leucine rich repeat, Leucine rich repeat, Leucine Rich repeat, Leucine Rich repeats (2 copies), Leucine Rich repeats (2 copies), Leucine Rich Repeat, Leucine Rich Repeat, Leucine Rich Repeat, Leucine Rich Repeat, Leucine Rich Repeat, Protein kinase domain	LEUCINE RICH REPEAT KINASE 2	Protein kinase-like (PK-like), L domain-like, RNI-like	GO:0004672|GO:0006468|GO:0005524|GO:0005515
813	gene-VFH_IV011920	Vfaba.Hedin2.R1.4g011920.1	18.7244	-4.00724	1.3676	-2.93013	0.00338815	0.0867182		-	non-haem dioxygenase in morphine synthesis N-terminal, 2OG-Fe(II) oxygenase superfamily	2-OXOGLUTARATE (2OG) AND FE(II)-DEPENDENT OXYGENASE SUPERFAMILY PROTEIN-RELATED, 2-OXOGLUTARATE (2OG) AND FE(II)-DEPENDENT OXYGENASE SUPERFAMILY PROTEIN-RELATED	Clavaminate synthase-like	-
814	gene-VFH_I364800	Vfaba.Hedin2.R1.1g364800.1	93.0302	1.36216	0.465213	2.92802	0.00341123	0.0872011		-	Zinc-finger domain of monoamine-oxidase A repressor R1	OS05G0300700 PROTEIN	-	GO:0006355
815	gene-VFH_III067400	Vfaba.Hedin2.R1.3g067400.1	130.384	1.01652	0.347284	2.92706	0.0034218	0.0873424		LG3@75.2, LG3@119.2	Arginase family, ABC transporter	ARGINASE/AGMATINASE	Arginase/deacetylase, P-loop containing nucleoside triphosphate hydrolases	GO:0016813|GO:0046872|GO:0005524
816	gene-VFH_IV106720	Vfaba.Hedin2.R1.4g106720.1	203.251	-1.00967	0.344978	-2.92675	0.00342519	0.0873424		-	Pyridine nucleotide-disulphide oxidoreductase	THIOREDOXIN REDUCTASE 1-RELATED-RELATED	FAD/NAD(P)-binding domain	GO:0016491|GO:0004791|GO:0005737|GO:0019430
817	gene-VFH_I467840	Vfaba.Hedin2.R1.1g467840.1	25.135	2.22292	0.759715	2.92599	0.00343364	0.08745		-	PADRE domain	DUF4228 DOMAIN PROTEIN-RELATED	-	-
818	gene-VFH_IV062200	Vfaba.Hedin2.R1.4g062200.1	2448.44	-0.871585	0.297946	-2.92531	0.00344113	0.0875331		-	e3 binding domain, Biotin-requiring enzyme, 2-oxoacid dehydrogenases acyltransferase (catalytic domain)	DIHYDROLIPOAMIDE ACETYL/SUCCINYL-TRANSFERASE-RELATED	CoA-dependent acyltransferases, Single hybrid motif, Peripheral subunit-binding domain of 2-oxo acid dehydrogenase complex	GO:0004742|GO:0006090|GO:0045254|GO:0006086|GO:0016746
819	gene-VFH_V068200	Vfaba.Hedin2.R1.5g068200.1	13.1376	-5.19435	1.77759	-2.92214	0.00347638	0.0883215		-	-	-	-	-
820	gene-VFH_II195760	Vfaba.Hedin2.R1.2g195760.1	196.015	-5.26301	1.80214	-2.92042	0.0034956	0.0887008		-	-	-	-	-
821	gene-VFH_II200480	Vfaba.Hedin2.R1.2g200480.1	96.5364	2.56506	0.878865	2.91861	0.00351596	0.0891082		-	Leucine carboxyl methyltransferase	S-ADENOSYL-L-METHIONINE-DEPENDENT METHYLTRANSFERASE YKTD-RELATED	S-adenosyl-L-methionine-dependent methyltransferases	GO:0008168|GO:0032259
822	gene-VFH_V073560	Vfaba.Hedin2.R1.5g073560.1	920.68	2.72819	0.934899	2.91816	0.003521	0.089127		LG5@79.6, LG5@86.9, LG5@93.9	Uncharacterized conserved protein (DUF2358)	PROTEIN, PUTATIVE (DUF2358)-RELATED	-	-
823	gene-VFH_V053880	Vfaba.Hedin2.R1.5g053880.1	4429.04	-1.3518	0.463603	-2.91586	0.00354711	0.0896783		LG5@79.6, LG5@86.9, LG5@93.9	Sodium/calcium exchanger protein, Sodium/calcium exchanger protein	VACUOLAR CALCIUM ION TRANSPORTER	-	GO:0006812|GO:0008324|GO:0016020|GO:0006816|GO:0015369|GO:0055085
824	gene-VFH_VI138560	Vfaba.Hedin2.R1.6g138560.1	20.1	6.97088	2.39112	2.91532	0.0035532	0.0896925		LG6@121.0	K+ potassium transporter, K+ potassium transporter, K+ potassium transporter	OSMOTIC STRESS POTASSIUM TRANSPORTER	-	GO:0015079|GO:0016020|GO:0071805
825	gene-VFH_IV128720	Vfaba.Hedin2.R1.4g128720.1	28.6962	4.75326	1.6306	2.91505	0.00355634	0.0896925		-	NPH3 family, BTB/POZ domain	OS12G0117600 PROTEIN	POZ domain	GO:0005515
826	gene-VFH_I214720	Vfaba.Hedin2.R1.1g214720.1	43.551	2.54574	0.873971	2.91284	0.00358158	0.0899984		qFB1.3	non-haem dioxygenase in morphine synthesis N-terminal, 2OG-Fe(II) oxygenase superfamily	OXOGLUTARATE/IRON-DEPENDENT DIOXYGENASE	Clavaminate synthase-like	-
827	gene-VFH_VI140680	Vfaba.Hedin2.R1.6g140680.1	1286.68	-1.03783	0.356312	-2.91269	0.00358325	0.0899984		LG6@121.0	LETM1-like, RBD	LEUCINE ZIPPER-EF-HAND CONTAINING TRANSMEMBRANE PROTEIN	EF-hand	GO:0005509|GO:0005743|GO:0043022
828	gene-VFH_I152440	Vfaba.Hedin2.R1.1g152440.2	122.07	-0.860688	0.295542	-2.91224	0.00358849	0.0899984		LG1@168.9	GlcNAc-PI de-N-acetylase	N-ACETYLGLUCOSAMINYL-PHOSPHATIDYLINOSITOL DE-N-ACETYLASE-RELATED	LmbE-like	-
829	gene-VFH_VI122400	Vfaba.Hedin2.R1.6g122400.1	158.841	-1.07522	0.369256	-2.91187	0.00359271	0.0899984		LG6@110.0, LG6@110.0, qFB6.1	bZIP transcription factor	CAMP-RESPONSE ELEMENT BINDING PROTEIN-RELATED	Leucine zipper domain	GO:0003700|GO:0045893|GO:0006355
830	gene-VFH_I170760	Vfaba.Hedin2.R1.1g170760.1	1936.75	-0.638876	0.219416	-2.91172	0.00359449	0.0899984		LG1@168.9	Protein kinase domain	SERINE/THREONINE-PROTEIN KINASE	Protein kinase-like (PK-like)	GO:0004674|GO:0005524|GO:0006468|GO:0004672
831	gene-VFH_V003440	Vfaba.Hedin2.R1.5g003440.1	2325.02	3.2918	1.13054	2.91171	0.00359455	0.0899984		-	WRKY DNA -binding domain	WRKY TRANSCRIPTION FACTOR 36-RELATED	WRKY DNA-binding domain	GO:0003700|GO:0006355|GO:0043565
832	gene-VFH_III147160	Vfaba.Hedin2.R1.3g147160.1	6.38918	-6.0182	2.06801	-2.91014	0.00361268	0.0903431		-	-	-	-	-
833	gene-VFH_VI182960	Vfaba.Hedin2.R1.6g182960.1	58.5145	3.43837	1.1818	2.90943	0.00362083	0.0904008		-	Myb-like DNA-binding domain	TRANSCRIPTION FACTOR KUA1	Homeodomain-like	GO:0003676|GO:0008270|GO:0003677
834	gene-VFH_III224000	Vfaba.Hedin2.R1.3g224000.1	854.273	-0.651354	0.223898	-2.90915	0.00362408	0.0904008		-	Vacuolar protein sorting protein 11 C terminal, Region in Clathrin and VPS	VACUOLAR PROTEIN SORTING-ASSOCIATED PROTEIN	RING/U-box, WD40 repeat-like	GO:0005515|GO:0006886|GO:0016192
835	gene-VFH_I085760	Vfaba.Hedin2.R1.1g085760.1	355.379	2.14056	0.735889	2.90881	0.00362808	0.0904008		LG1@168.9	-	-	Acetoacetate decarboxylase-like	-
836	gene-VFH_VI072520	Vfaba.Hedin2.R1.6g072520.1	44.5253	4.61648	1.58774	2.90757	0.00364244	0.0904617		-	GMC oxidoreductase, GMC oxidoreductase	LONG-CHAIN-ALCOHOL OXIDASE	FAD/NAD(P)-binding domain	GO:0016614|GO:0050660|GO:0046577
837	gene-VFH_III010520	Vfaba.Hedin2.R1.3g010520.1	3216.22	-0.748377	0.257391	-2.90755	0.0036427	0.0904617		-	ATP synthase alpha/beta family, beta-barrel domain, ATP synthase alpha/beta family, nucleotide-binding domain	V-TYPE PROTON ATPASE SUBUNIT B	P-loop containing nucleoside triphosphate hydrolases	GO:0033180|GO:0046961|GO:1902600|GO:0005524|GO:0046034
838	gene-VFH_U043880	Vfaba.Hedin2.R1.Ung043880.1	3671.02	-3.19239	1.09799	-2.90747	0.00364363	0.0904617		-	UDP-glucoronosyl and UDP-glucosyl transferase	GLUCOSYL/GLUCURONOSYL TRANSFERASES		GO:0008194
839	gene-VFH_II087320	Vfaba.Hedin2.R1.2g087320.1	14.4889	7.31084	2.51586	2.9059	0.003662	0.090807		LG2@102.1	Ndr family	N-MYC DOWNSTREAM REGULATED	alpha/beta-Hydrolases	-
840	gene-VFH_I455000	Vfaba.Hedin2.R1.1g455000.1	4727.01	-2.11584	0.728212	-2.90553	0.00366631	0.090807		-	Xylanase inhibitor N-terminal, Xylanase inhibitor C-terminal	ASPARTYL PROTEASE-RELATED	Acid proteases	GO:0004190|GO:0006508
841	gene-VFH_III179080	Vfaba.Hedin2.R1.3g179080.1	171.853	1.8595	0.640121	2.90491	0.00367356	0.0908779		-	PPPDE putative peptidase domain	DESUMOYLATING ISOPEPTIDASE	-	GO:0008233
842	gene-VFH_IV128320	Vfaba.Hedin2.R1.4g128320.1	11.0651	4.91267	1.69218	2.90317	0.00369407	0.0912743		-	-	OS01G0888066 PROTEIN-RELATED	-	-
843	gene-VFH_VI161240	Vfaba.Hedin2.R1.6g161240.1	212.715	-0.964901	0.332403	-2.9028	0.0036984	0.0912743		LG6@169.6	Williams-Beuren syndrome DDT (WSD), D-TOX E motif, ATP-utilising chromatin assembly and remodelling N-terminal, DDT domain	BROMODOMAIN ADJACENT TO ZINC FINGER DOMAIN, 2A	-	-
844	gene-VFH_V121200	Vfaba.Hedin2.R1.5g121200.1	2.16119	-7.74016	2.66704	-2.90215	0.00370611	NA		-	Tryptophan synthase alpha chain	TRYPTOPHAN SYNTHASE, ALPHA CHAIN	Ribulose-phoshate binding barrel	GO:0004834|GO:0006568
845	gene-VFH_VI121560	Vfaba.Hedin2.R1.6g121560.1	127.659	-0.990284	0.341254	-2.9019	0.00370908	0.0913692		LG6@110.0, LG6@110.0, qFB6.1	-	VACUOLAR IMPORT AND DEGRADATION PROTEIN 27	-	-
846	gene-VFH_III068400	Vfaba.Hedin2.R1.3g068400.1	350.489	-0.622027	0.214396	-2.9013	0.00371615	0.0913692		LG3@75.2, LG3@119.2	Actin	ACTIN	Actin-like ATPase domain, Actin-like ATPase domain	-
847	gene-VFH_U051960	Vfaba.Hedin2.R1.Ung051960.1	149.897	2.04294	0.704182	2.90116	0.00371788	0.0913692		-	FMN-dependent dehydrogenase	S -2-HYDROXY-ACID OXIDASE-RELATED		GO:0010181|GO:0016491
848	gene-VFH_IV131760	Vfaba.Hedin2.R1.4g131760.1	419.34	1.70804	0.588851	2.90064	0.003724	0.0913692		-	Homeobox associated leucine zipper, Homeodomain	HOMEOBOX-LEUCINE ZIPPER PROTEIN HAT14	Homeodomain-like	GO:0000981|GO:0006355|GO:0043565|GO:0003677
849	gene-VFH_U120200	Vfaba.Hedin2.R1.Ung120200.2	5633.95	-0.548571	0.189122	-2.90061	0.00372431	0.0913692		-	14-3-3 protein	14-3-3 PROTEIN		-
850	gene-VFH_I148680	Vfaba.Hedin2.R1.1g148680.1	511.477	-1.14275	0.394073	-2.89984	0.00373354	0.0914872		LG1@168.9	-	-	-	GO:0000724|GO:0003677
851	gene-VFH_III149480	Vfaba.Hedin2.R1.3g149480.1	722.212	1.72018	0.593368	2.89901	0.00374348	0.0916223		LG3@136.5, LG3@144.5	Protein tyrosine and serine/threonine kinase, Protein tyrosine and serine/threonine kinase, Salt stress response/antifungal, Salt stress response/antifungal	PROMASTIGOTE SURFACE ANTIGEN PROTEIN PSA	Protein kinase-like (PK-like)	GO:0004672|GO:0006468|GO:0005524
852	gene-VFH_II144480	Vfaba.Hedin2.R1.2g144480.1	199.223	3.07893	1.06225	2.8985	0.00374958	0.0916223		LG2@102.1	WRKY DNA -binding domain	WRKY TRANSCRIPTION FACTOR PROTEIN 1-RELATED	WRKY DNA-binding domain	GO:0003700|GO:0006355|GO:0043565
853	gene-VFH_VI107200	Vfaba.Hedin2.R1.6g107200.1	5.75842	4.86545	1.67875	2.89827	0.00375233	0.0916223		-	-	-	-	-
854	gene-VFH_III165120	Vfaba.Hedin2.R1.3g165120.1	17.7305	9.12732	3.15113	2.89652	0.00377327	0.0919504		-	Myb-like DNA-binding domain, Myb-like DNA-binding domain	MYB TRANSCRIPTION FACTOR-RELATED-RELATED	Homeodomain-like	GO:0003700|GO:0006355|GO:0043565|GO:0003824
855	gene-VFH_IV051440	Vfaba.Hedin2.R1.4g051440.1	354.081	2.63077	0.908287	2.89641	0.00377465	0.0919504		-	Cytochrome P450	CYTOCHROME P450 78A7-RELATED	Cytochrome P450	GO:0005506|GO:0016705|GO:0004497|GO:0020037
856	gene-VFH_I282480	Vfaba.Hedin2.R1.1g282480.1	521.367	2.50578	0.865513	2.89514	0.00378991	0.0920533		-	Leucine rich repeat, Leucine rich repeat, Leucine rich repeat N-terminal domain, Protein kinase domain	LEUCINE RICH REPEAT KINASE 2	Protein kinase-like (PK-like), L domain-like, L domain-like	GO:0004672|GO:0005524|GO:0006468|GO:0005515
857	gene-VFH_VI110320	Vfaba.Hedin2.R1.6g110320.1	190.826	-1.08546	0.375003	-2.89455	0.00379704	0.0920533		-	Serine aminopeptidase, S33	PHOSPHOLIPASE-RELATED	alpha/beta-Hydrolases	-
858	gene-VFH_III158920	Vfaba.Hedin2.R1.3g158920.1	337.887	-2.20941	0.763347	-2.89437	0.0037992	0.0920533		LG3@144.5	Fasciclin domain, Fasciclin domain	OS02G0491300 PROTEIN-RELATED	FAS1 domain, FAS1 domain	-
859	gene-VFH_II057960	Vfaba.Hedin2.R1.2g057960.1	18.2488	-6.25531	2.1612	-2.89436	0.00379927	0.0920533		LG2@84.5	Leucine Rich repeat, Leucine Rich repeat	UNCHARACTERIZED	RNI-like	GO:0005515
860	gene-VFH_II155640	Vfaba.Hedin2.R1.2g155640.1	11.9584	4.9685	1.7167	2.89421	0.0038011	0.0920533		-	-	-	-	-
861	gene-VFH_VI192760	Vfaba.Hedin2.R1.6g192760.1	551.702	-4.99928	1.72819	-2.89278	0.00381848	0.0923566		qFB6.2	PLAC8 family	DUF614 FAMILY PROTEIN-RELATED	-	-
862	gene-VFH_I043120	Vfaba.Hedin2.R1.1g043120.1	11.7887	3.33399	1.15268	2.89238	0.00382337	0.0923566		LG1@168.9	-	INTERACTOR OF CONSTITUTIVE ACTIVE ROPS 2, CHLOROPLASTIC-RELATED	-	-
863	gene-VFH_U051400	Vfaba.Hedin2.R1.Ung051400.1	794.581	-1.02515	0.354469	-2.89208	0.003827	0.0923566		-	Exocyst complex component Sec10, Exocyst complex component Sec10	SEC10		GO:0005737
864	gene-VFH_IV233600	Vfaba.Hedin2.R1.4g233600.1	37.8006	16.5382	5.72224	2.89016	0.00385047	0.0928147		-	Major intrinsic protein	AQUAPORIN OR AQUAGLYCEROPORIN RELATED	Aquaporin-like	GO:0015267|GO:0016020|GO:0055085
865	gene-VFH_IV065680	Vfaba.Hedin2.R1.4g065680.1	1193.69	-0.733451	0.25385	-2.88931	0.00386093	0.0928485		-	Ubiquitin carboxyl-terminal hydrolase, Ubiquitin family	UBIQUITIN CARBOXYL-TERMINAL HYDROLASE	Ubiquitin-like, Cysteine proteinases	GO:0004843|GO:0016579|GO:0043161|GO:0005515|GO:0006511
866	gene-VFH_VI198320	Vfaba.Hedin2.R1.6g198320.1	3217.75	3.01043	1.04196	2.88919	0.00386237	0.0928485		qFB6.2	FKBP-type peptidyl-prolyl cis-trans isomerase	PEPTIDYL-PROLYL CIS-TRANS ISOMERASE FKBP17-2, CHLOROPLASTIC	FKBP-like	GO:0003755
867	gene-VFH_IV105240	Vfaba.Hedin2.R1.4g105240.1	38.2982	-2.51752	0.87143	-2.88895	0.00386533	0.0928485		-	Nodulin-like	UNCHARACTERIZED NODULIN-LIKE PROTEIN	MFS general substrate transporter, MFS general substrate transporter	-
868	gene-VFH_I213800	Vfaba.Hedin2.R1.1g213800.1	847.906	-1.76131	0.609784	-2.88841	0.00387191	0.0928989		-	Phosphate-induced protein 1 conserved region	PROTEIN EXORDIUM-LIKE 5	-	-
869	gene-VFH_VI074280	Vfaba.Hedin2.R1.6g074280.1	3519.23	-0.783279	0.271259	-2.88757	0.00388236	0.0929816		-	26S proteasome non-ATPase regulatory subunit RPN1 C-terminal, RPN1 N-terminal domain, Proteasome/cyclosome repeat	26S PROTEASOME NON-ATPASE REGULATORY SUBUNIT	ARM repeat	GO:0000502|GO:0030234|GO:0042176
870	gene-VFH_II158120	Vfaba.Hedin2.R1.2g158120.1	499.605	-0.648151	0.224543	-2.88653	0.00389514	0.0929816		LG2@102.1, LG2@169.8	CBS domain, CBS domain, CBS domain, CBS domain, PB1 domain	AMP-ACTIVATED PROTEIN KINASE, GAMMA REGULATORY SUBUNIT	CBS-domain pair, CBS-domain pair, CAD & PB1 domains	GO:0005515
871	gene-VFH_VI008600	Vfaba.Hedin2.R1.6g008600.1	972.908	2.44017	0.845399	2.88641	0.00389664	0.0929816		-	Serine carboxypeptidase	SERINE PROTEASE FAMILY S10 SERINE CARBOXYPEPTIDASE	alpha/beta-Hydrolases	GO:0004185|GO:0006508
872	gene-VFH_III084320	Vfaba.Hedin2.R1.3g084320.1	291.412	-1.8514	0.64142	-2.8864	0.00389676	0.0929816		LG3@75.2, LG3@119.2	Phosphopantetheine attachment site	ACYL CARRIER PROTEIN	ACP-like	GO:0000036|GO:0006633|GO:0031177
873	gene-VFH_I225920	Vfaba.Hedin2.R1.1g225920.1	289.319	1.18059	0.409069	2.88606	0.00390103	0.0929816		-	AAA domain (Cdc48 subfamily)	CHAPERONE PROTEIN CLPD, CHLOROPLASTIC	P-loop containing nucleoside triphosphate hydrolases	GO:0005524|GO:0016887
874	gene-VFH_VI086800	Vfaba.Hedin2.R1.6g086800.1	479.149	-0.732371	0.253772	-2.88594	0.0039025	0.0929816		-	ZIP Zinc transporter	ZINC TRANSPORTER SLC39A7 HISTIDINE-RICH MEMBRANE PROTEIN KE4	-	GO:0016020|GO:0030001|GO:0046873|GO:0055085
875	gene-VFH_I075160	Vfaba.Hedin2.R1.1g075160.1	940.042	2.76566	0.958479	2.88547	0.00390831	0.0929816		LG1@168.9	Protein of unknown function (DUF2921)	FAMILY PROTEIN, PUTATIVE (DUF2921)-RELATED	-	-
876	gene-VFH_V059920	Vfaba.Hedin2.R1.5g059920.1	17.4282	-5.43383	1.88334	-2.88522	0.00391146	0.0929816		LG5@79.6, LG5@86.9, LG5@93.9	-	AUTOPHAGY PROTEIN 16-LIKE	WD40 repeat-like	GO:0005515|GO:0000045
877	gene-VFH_IV063400	Vfaba.Hedin2.R1.4g063400.1	225.162	4.25108	1.47374	2.88456	0.00391965	0.0929816		-	TIR domain, NB-ARC domain	LEUCINE-RICH REPEAT-CONTAINING PROTEIN	P-loop containing nucleoside triphosphate hydrolases, Toll/Interleukin receptor TIR domain, L domain-like, Winged helix DNA-binding domain	GO:0043531|GO:0006952|GO:0007165
878	gene-VFH_IV021800	Vfaba.Hedin2.R1.4g021800.1	188.781	-1.00867	0.349721	-2.88421	0.00392395	0.0929816		-	Phospholipid methyltransferase	PROTEIN-S ISOPRENYLCYSTEINE O-METHYLTRANSFERASE	-	-
879	gene-VFH_U044840	Vfaba.Hedin2.R1.Ung044840.1	1555.61	-0.694164	0.240684	-2.88413	0.00392498	0.0929816		-	26S proteasome subunit RPN7, PCI domain	26S PROTESOME SUBUNIT 6		-
880	gene-VFH_III002800	Vfaba.Hedin2.R1.3g002800.1	6.176	5.61573	1.94752	2.88353	0.00393249	0.0929816		-	Leucine rich repeat, Leucine rich repeat	OS01G0149700 PROTEIN	L domain-like	GO:0005515
881	gene-VFH_II154640	Vfaba.Hedin2.R1.2g154640.1	27.2876	2.8783	0.998257	2.88333	0.00393494	0.0929816		LG2@102.1	-	OS01G0888900 PROTEIN	-	-
882	gene-VFH_III071200	Vfaba.Hedin2.R1.3g071200.1	157.869	-0.890447	0.308854	-2.88307	0.00393822	0.0929816		LG3@75.2, LG3@119.2	PRA1 family protein	PRENYLATED RAB ACCEPTOR 1-RELATED	-	-
883	gene-VFH_II196200	Vfaba.Hedin2.R1.2g196200.1	23.9948	3.11215	1.07967	2.88251	0.00394519	0.0930285		-	Protein kinase domain	SERINE/THREONINE-PROTEIN KINASE IAL-RELATED	Protein kinase-like (PK-like)	GO:0004672|GO:0006468|GO:0005524
884	gene-VFH_I144440	Vfaba.Hedin2.R1.1g144440.1	21.2772	4.05012	1.40522	2.88219	0.0039492	0.0930285		LG1@168.9	Protein of unknown function (DUF1645)	OS07G0619500 PROTEIN	-	-
885	gene-VFH_U069000	Vfaba.Hedin2.R1.Ung069000.1	95.6727	-6.25085	2.16958	-2.88113	0.00396253	0.0930858		-	Major Facilitator Superfamily	SOLUTE CARRIER FAMILY 17		GO:0022857|GO:0055085
886	gene-VFH_VI161320	Vfaba.Hedin2.R1.6g161320.1	124.52	-0.796874	0.276593	-2.88104	0.00396369	0.0930858		LG6@169.6	mRNA cleavage and polyadenylation factor CLP1 P-loop	CLEAVAGE/POLYADENYLATION FACTOR IA SUBUNIT CLP1P	P-loop containing nucleoside triphosphate hydrolases	GO:0006396|GO:0051731
887	gene-VFH_V045200	Vfaba.Hedin2.R1.5g045200.1	85.9158	0.941898	0.326943	2.88092	0.00396512	0.0930858		-	GRAS domain family	OSJNBA0084A10.13 PROTEIN-RELATED	-	-
888	gene-VFH_V194400	Vfaba.Hedin2.R1.5g194400.1	111.096	3.26667	1.13416	2.88027	0.00397341	0.0931749		-	PAP_fibrillin	PLASTID-LIPID-ASSOCIATED PROTEIN 4, CHLOROPLASTIC-RELATED	-	-
889	gene-VFH_VI142080	Vfaba.Hedin2.R1.6g142080.1	3606.02	-5.95449	2.06782	-2.87959	0.00398189	0.0932681		LG6@121.0	Cupin, Cupin	OS03G0336100 PROTEIN-RELATED	RmlC-like cupins	GO:0045735
890	gene-VFH_II057600	Vfaba.Hedin2.R1.2g057600.1	128.763	-1.81088	0.628951	-2.87921	0.00398678	0.093277		LG2@84.5	Chloroplast envelope transporter	PROTEIN TIC110, CHLOROPLASTIC	-	-
891	gene-VFH_III114680	Vfaba.Hedin2.R1.3g114680.1	74.187	-4.55761	1.58348	-2.87822	0.00399921	0.0934623		LG3@75.2, LG3@119.2, LG3@136.5	non-haem dioxygenase in morphine synthesis N-terminal, 2OG-Fe(II) oxygenase superfamily	OXIDOREDUCTASE, 2OG-FE II OXYGENASE FAMILY PROTEIN	Clavaminate synthase-like	-
892	gene-VFH_IV240040	Vfaba.Hedin2.R1.4g240040.2	3415.12	-0.724687	0.251842	-2.87755	0.00400782	0.0935197		-	Sec23-binding domain of Sec16	SEC31-RELATED PROTEIN	WD40 repeat-like	GO:0006888|GO:0005515
893	gene-VFH_II011200	Vfaba.Hedin2.R1.2g011200.1	255.821	2.42606	0.843168	2.87732	0.0040107	0.0935197		LG2@10.7	NB-ARC domain	NB-ARC DOMAIN-CONTAINING PROTEIN-RELATED	P-loop containing nucleoside triphosphate hydrolases, L domain-like, L domain-like	GO:0043531
894	gene-VFH_III168760	Vfaba.Hedin2.R1.3g168760.1	7.74934	-5.48642	1.90718	-2.87672	0.00401831	0.0935918		-	-	-	-	-
895	gene-VFH_I213680	Vfaba.Hedin2.R1.1g213680.1	1803.44	-1.57389	0.547368	-2.87538	0.0040354	0.0937929		-	Phosphate-induced protein 1 conserved region	PROTEIN EXORDIUM-LIKE 5	-	-
896	gene-VFH_II185040	Vfaba.Hedin2.R1.2g185040.1	414.518	2.29945	0.799717	2.87533	0.004036	0.0937929		-	-	PLASTID TRANSCRIPTIONALLY ACTIVE PROTEIN	DnaJ/Hsp40 cysteine-rich domain	-
897	gene-VFH_IV114560	Vfaba.Hedin2.R1.4g114560.1	1844.92	-0.904044	0.314517	-2.87439	0.00404807	0.0939679		-	ATP synthase subunit C, ATP synthase subunit C	-	F1F0 ATP synthase subunit C, F1F0 ATP synthase subunit C	GO:0015078|GO:0033177|GO:1902600|GO:0033179|GO:0046961
898	gene-VFH_I464600	Vfaba.Hedin2.R1.1g464600.1	2.39011	-7.6662	2.6673	-2.87414	0.00405125	NA		-	-	-	-	-
899	gene-VFH_I219080	Vfaba.Hedin2.R1.1g219080.1	809.92	1.23186	0.428726	2.8733	0.00406214	0.0941795		qFB1.3	UDP-glucoronosyl and UDP-glucosyl transferase	GLYCOSYLTRANSFERASE	UDP-Glycosyltransferase/glycogen phosphorylase	GO:0008194
900	gene-VFH_I421480	Vfaba.Hedin2.R1.1g421480.1	1809.43	1.40313	0.488391	2.87297	0.00406628	0.0941795		-	Peptidase dimerisation domain, Peptidase family M20/M25/M40	ALLANTOATE DEIMINASE-RELATED	Bacterial exopeptidase dimerisation domain, Zn-dependent exopeptidases	GO:0016787|GO:0016813
901	gene-VFH_I159280	Vfaba.Hedin2.R1.1g159280.1	117.355	-1.28621	0.447966	-2.87123	0.00408884	0.0945962		LG1@168.9	Fcf2 pre-rRNA processing	UNCHARACTERIZED	-	-
902	gene-VFH_U068760	Vfaba.Hedin2.R1.Ung068760.1	1137.72	-0.475184	0.165586	-2.86971	0.00410847	0.0949442		-	Aminopeptidase P, N-terminal domain, Metallopeptidase family M24	XAA-PRO AMINOPEPTIDASE 3		GO:0030145|GO:0070006
903	gene-VFH_IV020640	Vfaba.Hedin2.R1.4g020640.1	3684.15	4.43466	1.54573	2.86897	0.00411808	0.0950602		-	Pathogenesis-related protein Bet v 1 family	POLYKETIDE CYCLASE/DEHYDRASE AND LIPID TRANSPORT SUPERFAMILY PROTEIN, POLYKETIDE CYCLASE/DEHYDRASE AND LIPID TRANSPORT SUPERFAMILY PROTEIN	Bet v1-like	GO:0006952
904	gene-VFH_I367960	Vfaba.Hedin2.R1.1g367960.1	408.408	1.32013	0.460385	2.86744	0.00413807	0.0954153		-	Remorin, C-terminal region	OS02G0116800 PROTEIN	-	-
905	gene-VFH_II243080	Vfaba.Hedin2.R1.2g243080.1	1126.66	3.79202	1.32275	2.86676	0.00414692	0.095513		-	Thiolase, C-terminal domain, Thiolase, N-terminal domain	3-KETOACYL-COA THIOLASE, PEROXISOMAL	Thiolase-like, Thiolase-like	GO:0016746|GO:0016747
906	gene-VFH_U093800	Vfaba.Hedin2.R1.Ung093800.1	307.684	0.764887	0.26686	2.86625	0.00415364	0.0955615		-	0	OSJNBA0011J08.25 PROTEIN-RELATED		-
907	gene-VFH_II108720	Vfaba.Hedin2.R1.2g108720.1	541.511	-5.55264	1.93795	-2.86522	0.00416726	0.0957684		LG2@102.1	Xyloglucan endo-transglycosylase (XET) C-terminus, Glycosyl hydrolases family 16	XYLOGLUCAN ENDOTRANSGLUCOSYLASE/HYDROLASE PROTEIN 8-RELATED	Concanavalin A-like lectins/glucanases	GO:0005618|GO:0006073|GO:0016762|GO:0048046|GO:0004553|GO:0005975|GO:0010411|GO:0042546
908	gene-VFH_V065480	Vfaba.Hedin2.R1.5g065480.1	51.4261	2.46817	0.861538	2.86484	0.00417214	0.0957741		LG5@79.6, LG5@86.9, LG5@93.9	Major Facilitator Superfamily, SPX domain, SPX domain	INNER MEMBRANE TRANSPORT PROTEIN YAJR	MFS general substrate transporter	GO:0022857|GO:0055085
909	gene-VFH_I228080	Vfaba.Hedin2.R1.1g228080.1	2983.66	-0.441902	0.154299	-2.86394	0.00418407	0.0959418		-	Ubiquitin-activating enzyme E1 FCCH domain, zinc-binding in reverse transcriptase, Ubiquitin-activating enzyme, SCCH domain, Ubiquitin fold domain, ThiF family, ThiF family	UBIQUITIN-ACTIVATING ENZYME E1	Activating enzymes of the ubiquitin-like proteins, Activating enzymes of the ubiquitin-like proteins	GO:0008641|GO:0036211
910	gene-VFH_I070800	Vfaba.Hedin2.R1.1g070800.1	1481.25	2.36484	0.825915	2.8633	0.0041926	0.0960309		LG1@168.9	GRAS domain family	OSJNBA0084A10.13 PROTEIN-RELATED	-	-
911	gene-VFH_III087720	Vfaba.Hedin2.R1.3g087720.1	235.635	-1.19538	0.417594	-2.86254	0.00420258	0.0961531		LG3@75.2, LG3@119.2	Helicase conserved C-terminal domain, DEAD/DEAH box helicase	RNA HELICASE	P-loop containing nucleoside triphosphate hydrolases, P-loop containing nucleoside triphosphate hydrolases	GO:0003724|GO:0003676|GO:0005524
912	gene-VFH_III233400	Vfaba.Hedin2.R1.3g233400.1	218.338	-0.968108	0.338257	-2.86205	0.00420908	0.0961955		-	Triose-phosphate Transporter family	SOLUTE CARRIER FAMILY 35	-	-
913	gene-VFH_IV118480	Vfaba.Hedin2.R1.4g118480.1	813.559	-0.819106	0.286239	-2.86162	0.00421484	0.0962211		-	Sugar (and other) transporter	-	MFS general substrate transporter	GO:0008643|GO:0051119|GO:0022857|GO:0016020|GO:0055085
914	gene-VFH_II179680	Vfaba.Hedin2.R1.2g179680.1	4002.64	-0.817251	0.285767	-2.85985	0.00423844	0.0965481		-	Endomembrane protein 70	TRANSMEMBRANE 9 SUPERFAMILY PROTEIN, TRANSMEMBRANE 9 SUPERFAMILY PROTEIN	MFS general substrate transporter	GO:0016020
915	gene-VFH_IV132640	Vfaba.Hedin2.R1.4g132640.1	38.9452	4.61373	1.6134	2.85963	0.00424134	0.0965481		-	Helix-loop-helix DNA-binding domain	BHLH TRANSCRIPTION FACTOR	HLH, helix-loop-helix DNA-binding domain	GO:0046983
916	gene-VFH_V181360	Vfaba.Hedin2.R1.5g181360.1	848.791	-0.608106	0.212662	-2.8595	0.00424316	0.0965481		-	Eukaryotic glutathione synthase, ATP binding domain, Eukaryotic glutathione synthase	GLUTATHIONE SYNTHETASE	Glutathione synthetase ATP-binding domain-like, PreATP-grasp domain	GO:0004363|GO:0005524|GO:0006750|GO:0016874
917	gene-VFH_I071760	Vfaba.Hedin2.R1.1g071760.2	826.85	-0.537407	0.187972	-2.85898	0.00425006	0.0965588		LG1@168.9	Variant UBP zinc finger, Zn-finger in ubiquitin-hydrolases and other protein, UBA/TS-N domain, UBA/TS-N domain, Ubiquitin carboxyl-terminal hydrolase	UBIQUITIN CARBOXYL-TERMINAL HYDROLASE	RING/U-box, Cysteine proteinases, UBA-like	GO:0008270|GO:0004843|GO:0006511|GO:0005515|GO:0016579
918	gene-VFH_I321360	Vfaba.Hedin2.R1.1g321360.1	76.7704	-1.21991	0.426797	-2.85828	0.00425945	0.0965588		-	Cullin protein neddylation domain, Cullin family	CULLIN	Cullin homology domain, Cullin repeat-like, Winged helix DNA-binding domain	GO:0006511|GO:0031625
919	gene-VFH_VI196960	Vfaba.Hedin2.R1.6g196960.1	120.624	-0.985028	0.344628	-2.85824	0.00426	0.0965588		qFB6.2	PPR repeat family, PPR repeat family, PPR repeat family, PPR repeat family, PPR repeat family, PPR repeat, PPR repeat, PPR repeat	TETRATRICOPEPTIDE REPEAT (TPR)-LIKE SUPERFAMILY PROTEIN-RELATED, TETRATRICOPEPTIDE REPEAT (TPR)-LIKE SUPERFAMILY PROTEIN-RELATED	HCP-like	GO:0005515
920	gene-VFH_I195400	Vfaba.Hedin2.R1.1g195400.1	2367.42	2.14145	0.749265	2.85807	0.00426228	0.0965588		-	Alcohol dehydrogenase GroES-like domain, Zinc-binding dehydrogenase	ALDEHYDE REDUCTASE	NAD(P)-binding Rossmann-fold domains, GroES-like	GO:0008270|GO:0016491
921	gene-VFH_II064600	Vfaba.Hedin2.R1.2g064600.1	97.1703	1.28212	0.448664	2.85763	0.00426814	0.096586		-	-	-	-	-
922	gene-VFH_I296800	Vfaba.Hedin2.R1.1g296800.1	127.296	-0.859705	0.300937	-2.85676	0.00427992	0.0967469		-	-	OS02G0582400 PROTEIN	-	-
923	gene-VFH_I098560	Vfaba.Hedin2.R1.1g098560.1	53.1186	5.12769	1.79542	2.85599	0.00429029	0.096816		LG1@168.9	non-haem dioxygenase in morphine synthesis N-terminal, 2OG-Fe(II) oxygenase superfamily	2-OXOGLUTARATE (2OG) AND FE(II)-DEPENDENT OXYGENASE SUPERFAMILY PROTEIN-RELATED, 2-OXOGLUTARATE (2OG) AND FE(II)-DEPENDENT OXYGENASE SUPERFAMILY PROTEIN-RELATED	Clavaminate synthase-like	-
924	gene-VFH_II059440	Vfaba.Hedin2.R1.2g059440.1	71.3614	-5.92996	2.07643	-2.85584	0.00429233	0.096816		LG2@84.5	Ketopantoate hydroxymethyltransferase, Arginase family	3-METHYL-2-OXOBUTANOATE HYDROXYMETHYLTRANSFERASE	Arginase/deacetylase, Phosphoenolpyruvate/pyruvate domain	GO:0003864|GO:0015940|GO:0046872|GO:0003824
925	gene-VFH_II111640	Vfaba.Hedin2.R1.2g111640.1	1224.82	-1.28512	0.450077	-2.85533	0.00429915	0.0968642		LG2@102.1	Ribosomal protein L22p/L17e	60S RIBOSOMAL PROTEIN L17	Ribosomal protein L22	GO:0003735|GO:0005840|GO:0006412|GO:0015934
926	gene-VFH_U102160	Vfaba.Hedin2.R1.Ung102160.2	41.8434	1.81901	0.637524	2.85325	0.00432748	0.0973966		-	Acetyltransferase (GNAT) family, BRCA1 C Terminus (BRCT) domain, BRCA1 C Terminus (BRCT) domain	PAX TRANSCRIPTION ACTIVATION DOMAIN INTERACTING PROTEIN		GO:0016747
927	gene-VFH_IV224040	Vfaba.Hedin2.R1.4g224040.1	878.005	3.19155	1.11914	2.85179	0.00434735	0.0976497		-	-	OS02G0793800 PROTEIN	-	-
928	gene-VFH_II269520	Vfaba.Hedin2.R1.2g269520.1	91.5816	1.46508	0.513752	2.85173	0.00434816	0.0976497		-	-	UNCHARACTERIZED	RNI-like, RNI-like	GO:0005515
929	gene-VFH_U029280	Vfaba.Hedin2.R1.Ung029280.1	983.765	-0.619727	0.217358	-2.85117	0.0043558	0.0977154		-	Proteasome subunit	METALLOPROTEASE TLDD		GO:0005839|GO:0051603
930	gene-VFH_VI197280	Vfaba.Hedin2.R1.6g197280.1	1436.12	1.71961	0.603375	2.84998	0.00437216	0.0979761		qFB6.2	N-terminal C2 in EEIG1 and EHBP1 proteins	PROTEIN PLASTID MOVEMENT IMPAIRED 1-RELATED 1	-	-
931	gene-VFH_I367600	Vfaba.Hedin2.R1.1g367600.1	813.393	1.2322	0.432527	2.84884	0.0043879	0.0982226		-	Protein of unknown function (DUF1685)	OSJNBA0071G03.3 PROTEIN	-	-
932	gene-VFH_II198040	Vfaba.Hedin2.R1.2g198040.1	1072.04	1.93403	0.679145	2.84774	0.00440308	0.098456		-	Protein kinase domain	LRR RECEPTOR-LIKE SERINE/THREONINE-PROTEIN KINASE-RELATED	Protein kinase-like (PK-like), L domain-like, RNI-like	GO:0004672|GO:0005524|GO:0006468
933	gene-VFH_V024720	Vfaba.Hedin2.R1.5g024720.1	1053.38	2.45654	0.86308	2.84625	0.00442376	0.0988003		-	-	HEAVY METAL TRANSPORT/DETOXIFICATION SUPERFAMILY PROTEIN, HEAVY METAL TRANSPORT/DETOXIFICATION SUPERFAMILY PROTEIN	HMA, heavy metal-associated domain	GO:0046872
934	gene-VFH_IV149880	Vfaba.Hedin2.R1.4g149880.1	42.3943	3.55728	1.24995	2.84594	0.00442803	0.0988003		LG4@135.3	-	VON WILLEBRAND FACTOR A DOMAIN PROTEIN	-	-
935	gene-VFH_II191040	Vfaba.Hedin2.R1.2g191040.1	121.922	-2.26957	0.797753	-2.84496	0.00444171	0.0989991		-	Sodium/calcium exchanger protein	VACUOLAR CALCIUM ION TRANSPORTER	-	GO:0016020|GO:0055085|GO:0006812|GO:0008324
936	gene-VFH_II067720	Vfaba.Hedin2.R1.2g067720.1	3392.72	1.76193	0.619662	2.84337	0.00446389	0.0993691		LG2@68.4, LG2@84.5	Flavin containing amine oxidoreductase	FLAVIN MONOAMINE OXIDASE	FAD-linked reductases, C-terminal domain, FAD/NAD(P)-binding domain	GO:0016491
937	gene-VFH_III148880	Vfaba.Hedin2.R1.3g148880.1	1454.26	-2.83979	0.998841	-2.84309	0.00446791	0.0993691		LG3@136.5, LG3@144.5	alpha/beta hydrolase fold	ARYLACETAMIDE DEACETYLASE	alpha/beta-Hydrolases	GO:0016787
938	gene-VFH_U101880	Vfaba.Hedin2.R1.Ung101880.1	363.068	1.79747	0.632572	2.84153	0.00448978	0.0996239		-	Protein phosphatase 2C	PROTEIN PHOSPHATASE		-
939	gene-VFH_VI081040	Vfaba.Hedin2.R1.6g081040.1	412.732	-0.846429	0.297904	-2.84128	0.00449323	0.0996239		-	Ribosomal protein L1p/L10e family	54S RIBOSOMAL PROTEIN L1, MITOCHONDRIAL	Ribosomal protein L1	GO:0003723|GO:0003735|GO:0006412|GO:0015934
940	gene-VFH_U041120	Vfaba.Hedin2.R1.Ung041120.1	149.402	1.96817	0.692714	2.84124	0.0044938	0.0996239		-	B3 DNA binding domain	B3 DOMAIN-CONTAINING TRANSCRIPTION FACTOR ABI3		GO:0003700|GO:0003677
941	gene-VFH_I269200	Vfaba.Hedin2.R1.1g269200.1	617.976	1.41522	0.498339	2.83988	0.00451309	0.0999443		-	Ankyrin repeats (3 copies), NPR1/NIM1 like defence protein C terminal, Domain of unknown function (DUF3420), BTB/POZ domain	REGULATORY PROTEIN NPR3	POZ domain, Ankyrin repeat	GO:0009862|GO:2000022|GO:2000031|GO:0005515
942	gene-VFH_V041480	Vfaba.Hedin2.R1.5g041480.1	304.912	3.75459	1.32236	2.83932	0.00452103	0.100013		-	Regulated-SNARE-like domain, Synaptobrevin	SNARE PROTEINS	SNARE-like, SNARE fusion complex	GO:0016020|GO:0016192
943	gene-VFH_III062200	Vfaba.Hedin2.R1.3g062200.1	927.369	3.76789	1.32738	2.83859	0.00453127	0.100072		LG3@75.2	AUX/IAA family	AUXIN-RESPONSIVE PROTEIN IAA17	CAD & PB1 domains	GO:0005515|GO:0005634|GO:0006355
944	gene-VFH_I405960	Vfaba.Hedin2.R1.1g405960.2	107.691	1.18421	0.417202	2.83845	0.00453333	0.100072		-	-	STEROL 3-BETA-GLUCOSYLTRANSFERASE	UDP-Glycosyltransferase/glycogen phosphorylase	GO:0008194
945	gene-VFH_IV202000	Vfaba.Hedin2.R1.4g202000.1	244.312	0.927255	0.326746	2.83785	0.0045419	0.100154		-	EF-hand domain pair, Region found in RelA / SpoT proteins	GUANOSINE-3', 5'-BIS DIPHOSPHATE 3'-PYROPHOSPHOHYDROLASE	Nucleotidyltransferase, EF-hand	GO:0015969|GO:0005509
946	gene-VFH_IV078200	Vfaba.Hedin2.R1.4g078200.1	229.046	-1.0038	0.353879	-2.83655	0.00456039	0.100439		-	Pre-mRNA-splicing factor SF3a complex subunit 2 (Prp11), Zinc-finger of C2H2 type	SPLICING FACTOR 3A SUBUNIT 2	beta-beta-alpha zinc fingers	GO:0003676|GO:0005634|GO:0008270
947	gene-VFH_VI015720	Vfaba.Hedin2.R1.6g015720.1	121.673	-1.29701	0.457297	-2.83626	0.00456453	0.100439		-	3'-5' exonuclease, HRDC domain	POLYMYOSITIS/SCLERODERMA AUTOANTIGEN-RELATED	Ribonuclease H-like, HRDC-like	GO:0003676|GO:0006139|GO:0008408|GO:0000175|GO:0000467|GO:0000166|GO:0044237
948	gene-VFH_I028000	Vfaba.Hedin2.R1.1g028000.1	1625.11	-1.55316	0.54769	-2.83583	0.00457068	0.100468		-	pfkB family carbohydrate kinase	HEXOKINASE FAMILY MEMBER	Ribokinase-like	GO:0016301|GO:0016773
949	gene-VFH_U002000	Vfaba.Hedin2.R1.Ung002000.1	272.473	1.60772	0.567172	2.83462	0.00458802	0.100742		-	AUX/IAA family	AUXIN-RESPONSIVE PROTEIN IAA17		GO:0005515|GO:0005634|GO:0006355
950	gene-VFH_U054280	Vfaba.Hedin2.R1.Ung054280.1	587.584	1.14755	0.404908	2.83411	0.00459539	0.100773		-	MSP (Major sperm protein) domain	VESICLE-ASSOCIATED MEMBRANE PROTEIN-ASSOCIATED PROTEIN		GO:0005789
951	gene-VFH_I446560	Vfaba.Hedin2.R1.1g446560.1	736.095	0.919196	0.324363	2.83384	0.00459916	0.100773		-	F-box domain	OS02G0783600 PROTEIN	F-box domain, Galactose oxidase, central domain	GO:0005515
952	gene-VFH_II154560	Vfaba.Hedin2.R1.2g154560.1	440.71	-1.2493	0.441105	-2.83222	0.00462265	0.101129		LG2@102.1	Respiratory burst NADPH oxidase, Ferric reductase NAD binding domain, Ferric reductase NAD binding domain, FAD-binding domain, Ferric reductase like transmembrane component	NADPH OXIDASE	Riboflavin synthase domain-like, Ferredoxin reductase-like, C-terminal NADP-linked domain, EF-hand	GO:0016020|GO:0016491|GO:0004601|GO:0050664|GO:0005509
953	gene-VFH_I014440	Vfaba.Hedin2.R1.1g014440.1	884.917	4.12714	1.4573	2.83204	0.00462518	0.101129		-	Transferase family	-	-	-
954	gene-VFH_I365680	Vfaba.Hedin2.R1.1g365680.1	526.324	-1.06524	0.37623	-2.83136	0.00463507	0.101191		-	tRNA synthetases class I (W and Y)	TRYPTOPHANYL-TRNA SYNTHETASE	Nucleotidylyl transferase	GO:0000166|GO:0004812|GO:0005524|GO:0006418|GO:0004830|GO:0006436
955	gene-VFH_I382400	Vfaba.Hedin2.R1.1g382400.1	39.2671	2.63344	0.930159	2.83117	0.0046378	0.101191		-	Plant invertase/pectin methylesterase inhibitor	PECTINESTERASE INHIBITOR-LIKE	Plant invertase/pectin methylesterase inhibitor	GO:0004857
956	gene-VFH_I195120	Vfaba.Hedin2.R1.1g195120.1	1061	4.45312	1.57311	2.83077	0.0046436	0.101211		-	Alcohol dehydrogenase GroES-like domain, Zinc-binding dehydrogenase	ALDEHYDE REDUCTASE	NAD(P)-binding Rossmann-fold domains, GroES-like	GO:0016491|GO:0008270
957	gene-VFH_VI002120	Vfaba.Hedin2.R1.6g002120.1	159.305	1.13474	0.401362	2.82722	0.00469534	0.102231		-	VAD1 Analog of StAR-related lipid transfer domain, VAD1 Analog of StAR-related lipid transfer domain, GRAM domain, C2 domain, C2 domain	BNAA05G37250D PROTEIN	C2 domain (Calcium/lipid-binding domain, CaLB), C2 domain (Calcium/lipid-binding domain, CaLB)	-
958	gene-VFH_VI092360	Vfaba.Hedin2.R1.6g092360.1	112886	4.28611	1.51637	2.82656	0.00470509	0.102336		-	Chlorophyll A-B binding protein	CHLOROPHYLL A/B BINDING PROTEIN	Chlorophyll a-b binding protein	GO:0009765|GO:0016020
959	gene-VFH_I309240	Vfaba.Hedin2.R1.1g309240.1	29.7857	17.0501	6.03478	2.82531	0.00472351	0.102581		qFB1.2	Pathogenesis-related protein Bet v 1 family	-	Bet v1-like	GO:0006952
960	gene-VFH_II246360	Vfaba.Hedin2.R1.2g246360.1	24.4812	4.7185	1.67021	2.8251	0.00472665	0.102581		-	Protein kinase domain	G-TYPE LECTIN S-RECEPTOR-LIKE SERINE/THREONINE-PROTEIN KINASE SD2-5	Protein kinase-like (PK-like)	GO:0005524|GO:0004672|GO:0006468
961	gene-VFH_II017000	Vfaba.Hedin2.R1.2g017000.1	1656.6	1.24268	0.43992	2.82479	0.00473123	0.102581		LG2@10.7	Ataxin-2 C-terminal region	OS05G0344200 PROTEIN	-	-
962	gene-VFH_II092680	Vfaba.Hedin2.R1.2g092680.1	172.299	-1.94552	0.689383	-2.82211	0.00477085	0.103312		LG2@102.1	U-box domain	U BOX DOMAIN-CONTAINING	RING/U-box, ARM repeat	GO:0005515|GO:0004842|GO:0016567
963	gene-VFH_U084080	Vfaba.Hedin2.R1.Ung084080.1	6.65673	7.0758	2.50792	2.82138	0.00478172	0.103312		-	Clp protease	ATP-DEPENDENT CLP PROTEASE PROTEOLYTIC SUBUNIT		GO:0004176|GO:0004252|GO:0006508
964	gene-VFH_I265680	Vfaba.Hedin2.R1.1g265680.1	11.2989	4.0284	1.42781	2.82138	0.00478178	0.103312		-	Domain of unknown function (DUF4413), hAT family C-terminal dimerisation region	BED FINGER-RELATED	Ribonuclease H-like	GO:0046983|GO:0003677
965	gene-VFH_IV133920	Vfaba.Hedin2.R1.4g133920.1	34.3035	3.37958	1.19794	2.82117	0.00478491	0.103312		-	-	-	-	-
966	gene-VFH_III090080	Vfaba.Hedin2.R1.3g090080.1	36.9084	2.88279	1.02199	2.82077	0.00479088	0.103333		LG3@75.2, LG3@119.2	Universal stress protein family	ADENINE NUCLEOTIDE ALPHA HYDROLASES-LIKE SUPERFAMILY PROTEIN, ADENINE NUCLEOTIDE ALPHA HYDROLASES-LIKE SUPERFAMILY PROTEIN	Adenine nucleotide alpha hydrolases-like	-
967	gene-VFH_IV218880	Vfaba.Hedin2.R1.4g218880.1	600.019	-3.67229	1.30216	-2.82016	0.00479994	0.103421		-	Xyloglucan endo-transglycosylase (XET) C-terminus, Glycosyl hydrolases family 16	XYLOGLUCAN ENDOTRANSGLUCOSYLASE/HYDROLASE PROTEIN 8-RELATED	Concanavalin A-like lectins/glucanases	GO:0004553|GO:0005618|GO:0006073|GO:0016762|GO:0048046|GO:0005975|GO:0010411|GO:0042546
968	gene-VFH_III163120	Vfaba.Hedin2.R1.3g163120.1	201.319	1.28103	0.454451	2.81885	0.00481961	0.103737		-	Trehalose-phosphatase, Glycosyltransferase family 20	TREHALOSE-6-PHOSPHATE SYNTHASE	HAD-like, UDP-Glycosyltransferase/glycogen phosphorylase	GO:0003824|GO:0005992
969	gene-VFH_III158560	Vfaba.Hedin2.R1.3g158560.1	169.832	1.16239	0.412506	2.81788	0.00483422	0.103943		LG3@144.5	Exonuclease V - a 5' deoxyribonuclease, Exonuclease V - a 5' deoxyribonuclease	EXONUCLEASE V	-	GO:0045145
970	gene-VFH_I173800	Vfaba.Hedin2.R1.1g173800.1	426.927	-0.835665	0.296608	-2.81741	0.00484126	0.103987		LG1@168.9	DAK2 domain, Dak1 domain	TRIOKINASE/FMN CYCLASE	DAK1/DegV-like, DhaL-like	GO:0004371|GO:0006071|GO:0005524
971	gene-VFH_VI191360	Vfaba.Hedin2.R1.6g191360.1	17.2856	3.79721	1.34794	2.81705	0.00484669	0.103995		qFB6.2	-	IQ DOMAIN-CONTAINING PROTEIN IQM3	-	-
972	gene-VFH_V137960	Vfaba.Hedin2.R1.5g137960.1	8.57379	-5.58749	1.98548	-2.81418	0.00489015	0.104717		-	-	-	-	-
973	gene-VFH_IV139080	Vfaba.Hedin2.R1.4g139080.1	103.279	1.80974	0.643083	2.81416	0.00489042	0.104717		-	Cotton fibre expressed protein	EXPRESSED PROTEIN	-	-
974	gene-VFH_I347560	Vfaba.Hedin2.R1.1g347560.1	45.5417	-4.65676	1.6553	-2.81325	0.00490437	0.104799		-	Hydroxymethylglutaryl-coenzyme A reductase	3-HYDROXY-3-METHYLGLUTARYL-COENZYME A REDUCTASE	Substrate-binding domain of HMG-CoA reductase, NAD-binding domain of HMG-CoA reductase	GO:0004420|GO:0005515|GO:0008299|GO:0015936|GO:0016616
975	gene-VFH_I347600	Vfaba.Hedin2.R1.1g347600.1	45.5417	-4.65676	1.6553	-2.81325	0.00490437	0.104799		-	Hydroxymethylglutaryl-coenzyme A reductase	3-HYDROXY-3-METHYLGLUTARYL-COENZYME A REDUCTASE	Substrate-binding domain of HMG-CoA reductase, NAD-binding domain of HMG-CoA reductase	GO:0004420|GO:0005515|GO:0008299|GO:0015936|GO:0016616
976	gene-VFH_II175440	Vfaba.Hedin2.R1.2g175440.1	1406.82	2.88487	1.02561	2.81283	0.00491069	0.104826		LG2@169.8, LG2@171.4	-	NAD(P)H-QUINONE OXIDOREDUCTASE SUBUNIT U, CHLOROPLASTIC	Chaperone J-domain	GO:0009535|GO:0010598
977	gene-VFH_I098080	Vfaba.Hedin2.R1.1g098080.1	566.267	0.927259	0.329701	2.81242	0.00491703	0.104853		LG1@168.9	Protein tyrosine and serine/threonine kinase, Protein tyrosine and serine/threonine kinase	OS07G0586332 PROTEIN	Protein kinase-like (PK-like)	GO:0005524|GO:0004672|GO:0006468
978	gene-VFH_IV203840	Vfaba.Hedin2.R1.4g203840.1	7.35811	-6.94873	2.47183	-2.81117	0.0049362	0.105153		-	-	-	-	-
979	gene-VFH_II088600	Vfaba.Hedin2.R1.2g088600.1	583.842	-1.10876	0.394548	-2.81021	0.00495098	0.105294		LG2@102.1	Raffinose synthase or seed imbibition protein Sip1	-	(Trans)glycosidases	-
980	gene-VFH_V048160	Vfaba.Hedin2.R1.5g048160.1	20.6613	6.31868	2.24858	2.81008	0.00495298	0.105294		-	Probable lipid transfer	LIPID BINDING PROTEIN-RELATED	Bifunctional inhibitor/lipid-transfer protein/seed storage 2S albumin	GO:0005504|GO:0009627
981	gene-VFH_III132160	Vfaba.Hedin2.R1.3g132160.1	2587	2.23895	0.796971	2.80932	0.00496458	0.105432		LG3@75.2, LG3@119.2, LG3@136.5	Heavy-metal-associated domain	COPPER TRANSPORT PROTEIN FAMILY-RELATED	HMA, heavy metal-associated domain	GO:0046872
982	gene-VFH_I259680	Vfaba.Hedin2.R1.1g259680.1	544.188	-1.15731	0.412213	-2.80754	0.0049921	0.105908		-	Ubiquitin fusion degradation protein UFD1	UBIQUITIN FUSION DEGRADATON PROTEIN 1	-	GO:0006511
983	gene-VFH_IV189360	Vfaba.Hedin2.R1.4g189360.1	245.302	-1.84512	0.657542	-2.80609	0.00501464	0.106277		-	Phosphopantetheine attachment site	ACYL CARRIER PROTEIN	ACP-like	GO:0000036|GO:0006633
984	gene-VFH_V170640	Vfaba.Hedin2.R1.5g170640.1	4.0362	5.03454	1.79601	2.80317	0.00506023	NA		-	Chitinase class I	CHITINASE-RELATED	Lysozyme-like	GO:0004568|GO:0005975|GO:0006032|GO:0016998
985	gene-VFH_I045400	Vfaba.Hedin2.R1.1g045400.1	178.26	1.96518	0.701269	2.80233	0.00507357	0.107417		LG1@168.9	TCP family transcription factor	TRANSCRIPTION FACTOR TCP4-RELATED	-	GO:0003700
986	gene-VFH_U095800	Vfaba.Hedin2.R1.Ung095800.1	95.2875	2.64407	0.944236	2.80023	0.00510668	0.108007		-	Dynein light chain type 1	DYNEIN LIGHT CHAIN		GO:0007017|GO:0030286
987	gene-VFH_I199920	Vfaba.Hedin2.R1.1g199920.1	154.91	1.93792	0.692468	2.79857	0.00513301	0.108453		-	Leucine rich repeat, Leucine rich repeat N-terminal domain, Protein kinase domain	SOMATIC EMBRYOGENESIS RECEPTOR KINASE 1	Protein kinase-like (PK-like), L domain-like	GO:0005524|GO:0004672|GO:0006468|GO:0005515
988	gene-VFH_VI007840	Vfaba.Hedin2.R1.6g007840.1	288.453	-0.733613	0.262329	-2.79654	0.00516528	0.109024		-	SCAMP family	SECRETORY CARRIER-ASSOCIATED MEMBRANE PROTEIN SCAMP	-	GO:0015031|GO:0016020
989	gene-VFH_I011920	Vfaba.Hedin2.R1.1g011920.1	64.2648	2.37372	0.848963	2.79603	0.00517352	0.109086		-	Tyrosine phosphatase family, C2 domain of PTEN tumour-suppressor protein	PHOSPHATASE WITH HOMOLOGY TO TENSIN	(Phosphotyrosine protein) phosphatases II, C2 domain (Calcium/lipid-binding domain, CaLB)	GO:0004721|GO:0016311|GO:0016791
990	gene-VFH_III136680	Vfaba.Hedin2.R1.3g136680.1	3.31786	6.07326	2.1731	2.79474	0.0051941	NA		-	-	-	-	-
991	gene-VFH_VI019000	Vfaba.Hedin2.R1.6g019000.1	101.716	-1.28892	0.461367	-2.79369	0.0052111	0.109762		-	Serine aminopeptidase, S33	HYDROLASE, ALPHA/BETA FOLD FAMILY PROTEIN, EXPRESSED-RELATED	alpha/beta-Hydrolases	-
992	gene-VFH_I375280	Vfaba.Hedin2.R1.1g375280.1	1066.41	-0.411084	0.147179	-2.7931	0.00522059	0.109762		-	Aminotransferase class-V	CYSTEINE DESULFURYLASE FAMILY MEMBER	PLP-dependent transferases	GO:0030170|GO:0031071|GO:0044571|GO:0003824
993	gene-VFH_VI118640	Vfaba.Hedin2.R1.6g118640.1	1869.28	1.28216	0.459071	2.79295	0.005223	0.109762		LG6@110.0, LG6@110.0, qFB6.1	PMR5 N terminal Domain, GDSL/SGNH-like Acyl-Esterase family found in Pmr5 and Cas1p	PROTEIN TRICHOME BIREFRINGENCE-LIKE 9-RELATED	-	GO:0016740|GO:0016413
994	gene-VFH_I106720	Vfaba.Hedin2.R1.1g106720.1	60.5428	-4.30916	1.543	-2.79272	0.00522674	0.109762		LG1@168.9	-	-	Hemopexin-like domain	-
995	gene-VFH_I240840	Vfaba.Hedin2.R1.1g240840.2	888.672	-1.17698	0.421894	-2.78976	0.00527467	0.110656		-	Phosphomethylpyrimidine kinase	PYRIDOXAL KINASE	Ribokinase-like	GO:0008478|GO:0009443
996	gene-VFH_III071720	Vfaba.Hedin2.R1.3g071720.1	2199.03	-1.97709	0.708817	-2.78928	0.00528258	0.110688		LG3@75.2, LG3@119.2	Putative S-adenosyl-L-methionine-dependent methyltransferase	SAM-DEPENDENT METHYLTRANSFERASE	S-adenosyl-L-methionine-dependent methyltransferases, S-adenosyl-L-methionine-dependent methyltransferases	GO:0008168
997	gene-VFH_IV078240	Vfaba.Hedin2.R1.4g078240.1	728.146	-0.788609	0.282756	-2.78901	0.00528691	0.110688		-	NADH ubiquinone oxidoreductase subunit NDUFA12	NADH-UBIQUINONE OXIDOREDUCTASE SUBUNIT B17.2	-	GO:0016020|GO:0032981
998	gene-VFH_IV020680	Vfaba.Hedin2.R1.4g020680.1	500.184	4.79414	1.71954	2.78803	0.00530299	0.110822		-	Pathogenesis-related protein Bet v 1 family	POLYKETIDE CYCLASE/DEHYDRASE AND LIPID TRANSPORT SUPERFAMILY PROTEIN, POLYKETIDE CYCLASE/DEHYDRASE AND LIPID TRANSPORT SUPERFAMILY PROTEIN	Bet v1-like	GO:0006952
999	gene-VFH_II067640	Vfaba.Hedin2.R1.2g067640.1	1191.12	1.1882	0.426206	2.78785	0.00530587	0.110822		LG2@68.4, LG2@84.5	-	OS08G0516900 PROTEIN	-	-
1000	gene-VFH_U087880	Vfaba.Hedin2.R1.Ung087880.1	147.767	-1.14104	0.409322	-2.78764	0.00530937	0.110822		-	Multicopper oxidase, Multicopper oxidase, Multicopper oxidase	MULTI-COPPER OXIDASE		GO:0005507|GO:0016491
1001	gene-VFH_V048640	Vfaba.Hedin2.R1.5g048640.1	74.9296	2.33184	0.836652	2.78711	0.00531812	0.110824		-	Glutathione S-transferase, N-terminal domain, Glutathione S-transferase, C-terminal domain	GLUTATHIONE S-TRANSFERASE, GST, SUPERFAMILY, GST DOMAIN CONTAINING, GLUTATHIONE S-TRANSFERASE, GST, SUPERFAMILY, GST DOMAIN CONTAINING	Thioredoxin-like, GST C-terminal domain-like	GO:0004364|GO:0006749
[truncated: 33,378 more rows]

## Sheet: Table_S6
Table S6: Results table for DESeq2 (v. 1.38.3; R v. 4.2.2), differential expression between control and inoculated with Botrytis fabae, 33 h.p.i. for NV293 (S) (leaf). Pfam, PANTHER and SUPERFAMILY functional annotations. Results sorted and ranked by Padj (Benjamini and Hochberg, 1995). Reads counted against annotation of Vicia faba cv. Hedin2, assembly GCA_948472305.1, accessed 14 November 2023
[truncated: 34,381 more rows]

[truncated: 3 more sheets: Table_S7, Table_S8, Table_S9]
